# Supplementary material for: Synthesis and Insecticidal Evaluation of Chiral Neonicotinoids Analogs: The Laurel Wilt Case
Source: MDPI journal article supplement (doi:10.3390/molecules26144225), 2021-07-12
Supplement: s1 [file s1]

# Synthesis and insecticidal evaluation of chiral neonicotinoids analogs: The Laurelt wilt case

Saúl A. Luna-Hernández <sup>1</sup>, Israel Bonilla-Landa <sup>1</sup>, Alfonso Reyes-Luna <sup>1</sup>, Alfredo Rodríguez-Hernández <sup>1</sup>, Ulises Cuapio-Muñoz <sup>1</sup>, Luis A. Ibarra-Juárez <sup>1</sup>, Gabriel Suarez-Mendez,<sup>1</sup> Felipe Barrera-Méndez <sup>1,3</sup>, Irving D. Pérez-Landa <sup>1</sup>, Francisco J. Enríquez-Medrano <sup>2</sup>, Ramón E. Díaz de León-Gómez <sup>2</sup>, and José L. Olivares-Romero <sup>1,\*</sup>

<sup>1</sup> Instituto de Ecología, A.C., Red de Estudios Moleculares Avanzados, Clúster Científico y Tecnológico BioMimic®, Campus III, Carretera Antigua a Coatepec No. 351, 91073, Xalapa, Veracruz, México; c7h5n3o6.lh@gmail.com (S.A.L.H.); israel.bonilla@inecol.mx (I.B.L.); alfonsoreyeslunauv@gmail.com (A.R.L.); fredor2236@gmail.com (A.R.H.); ulisescuapio@gmail.com (U.C.H.); luis.Ibarra@inecol.mx (L.A.I.J.); investigacion.suarez@hotmail.com (G.S.M.) felipe.barrera@inecol.mx (F.B.M.); david.perez@posgrado.ecologia.edu.mx (I.D.P.L)

<sup>2</sup> Centro de Investigación en Química Aplicada, Blvd. Enrique Reyna, No. 140, 25294, Saltillo, Coahuila, México.; javier.enriquez@ciqa.edu.mx (F.J.E.M.); ramon.diazdeleon@ciqa.edu.mx (R.E.D.d.L.G.)

<sup>3</sup> Cátedra CONACyT en el Instituto de Ecología, A.C; felipe.barrera@inecol.mx

\*Correspondence: jose.olivares@inecol.mx

This document contains all the <sup>1</sup>H and <sup>13</sup>C NMR spectra for all compounds.

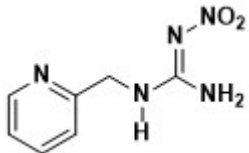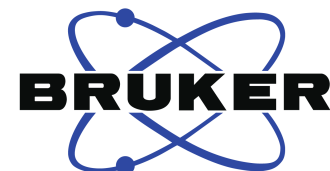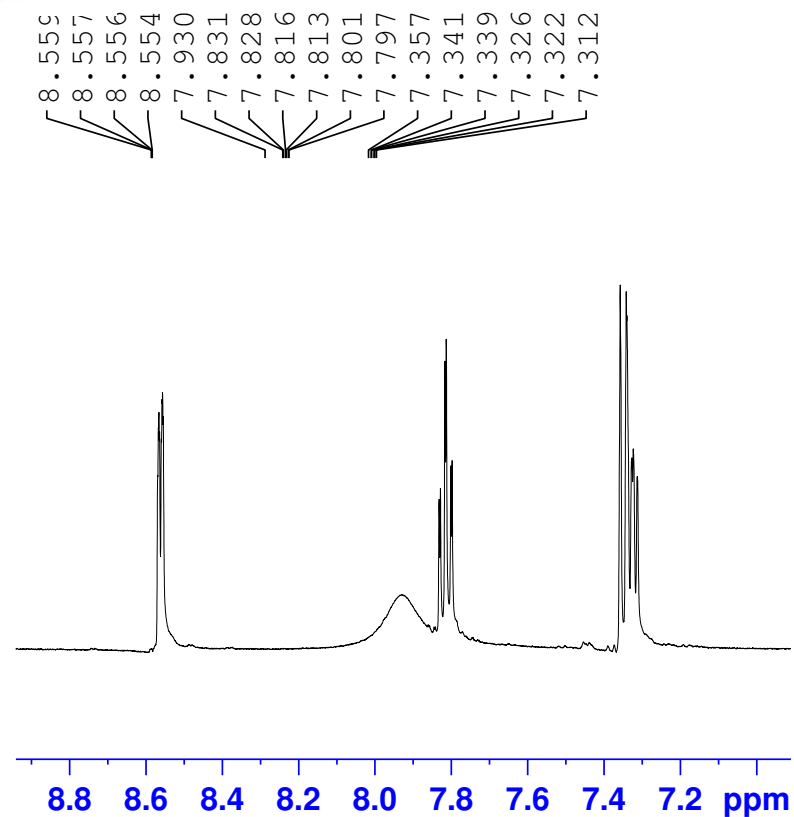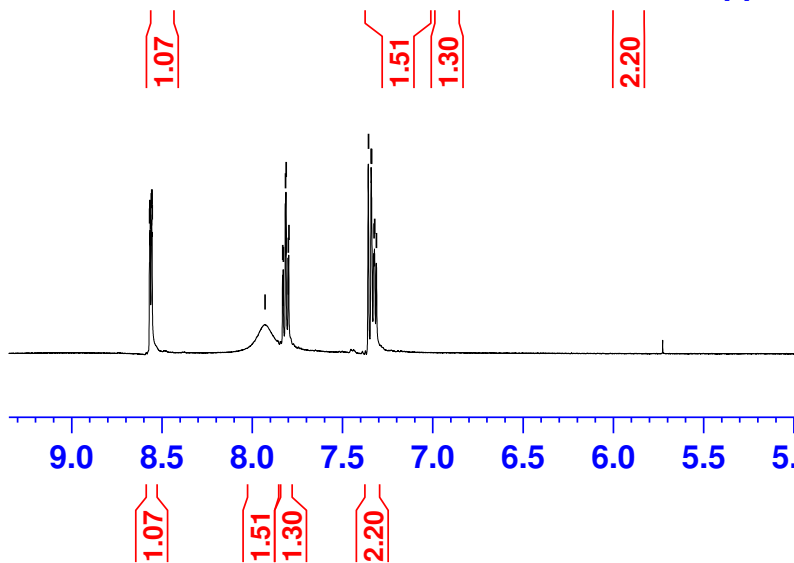

Current Data Parameters  
 NAME 2  
 EXPNO 2  
 PROCNO 1

F2 - Acquisition Parameters  
 Date\_ 20180703  
 Time 12.22 h  
 INSTRUM spect  
 PROBHD Z119470\_0187 (   
 PULPROG zg30  
 TD 65536  
 SOLVENT DMSO  
 NS 5  
 DS 1  
 SWH 10000.000 Hz  
 FIDRES 0.305176 Hz  
 AQ 3.2767999 sec  
 RG 139.09  
 DW 50.000 usec  
 DE 6.50 usec  
 TE 323.1 K  
 D1 1.00000000 sec  
 TD0 1  
 SFO1 500.1830886 MHz  
 NUC1 1H  
 P1 10.00 usec  
 PLW1 18.10400009 W

F2 - Processing parameters  
 SI 65536  
 SF 500.1800000 MHz  
 WDW EM  
 SSB 0  
 LB 0.30 Hz  
 GB 0  
 PC 1.00

—159.42  
—156.81

—129.71  
—127.72

—114.52

—79.58  
—77.30

—55.58  
—50.41

—33.91

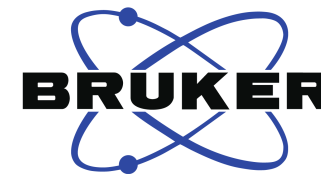

Current Data Parameters  
NAME 47  
EXPNO 3  
PROCNO 1

F2 - Acquisition Parameters  
Date\_ 20190611  
Time 18.18 h  
INSTRUM spect  
PROBHD Z119470\_0187 (  
PULPROG deptq135  
TD 65536  
SOLVENT DMSO  
NS 200  
DS 8  
SWH 29761.904 Hz  
FIDRES 0.908261 Hz  
AQ 1.1010048 sec  
RG 192.72  
DW 16.800 usec  
DE 6.50 usec  
TE 298.2 K  
CNST2 145.0000000  
D1 2.00000000 sec  
D2 0.00344828 sec  
D12 0.00002000 sec  
TD0 1  
SFO1 125.7829381 MHz  
NUC1 13C  
P1 10.00 usec  
PCPD 20.00 usec  
PLW1 82.09700012 W  
SFO2 500.1820007 MHz  
NUC2 1H  
CPDPRG[2] waltz16  
P0 15.70 usec  
P3 10.47 usec  
P4 20.94 usec  
PCPD2 80.00 usec  
PLW2 18.10400009 W  
PLW12 0.31009001 W

F2 - Processing parameters  
SI 32768  
SF 125.7703610 MHz  
WDW EM  
SSB 0  
LB 1.00 Hz  
GB 0  
PC 1.40

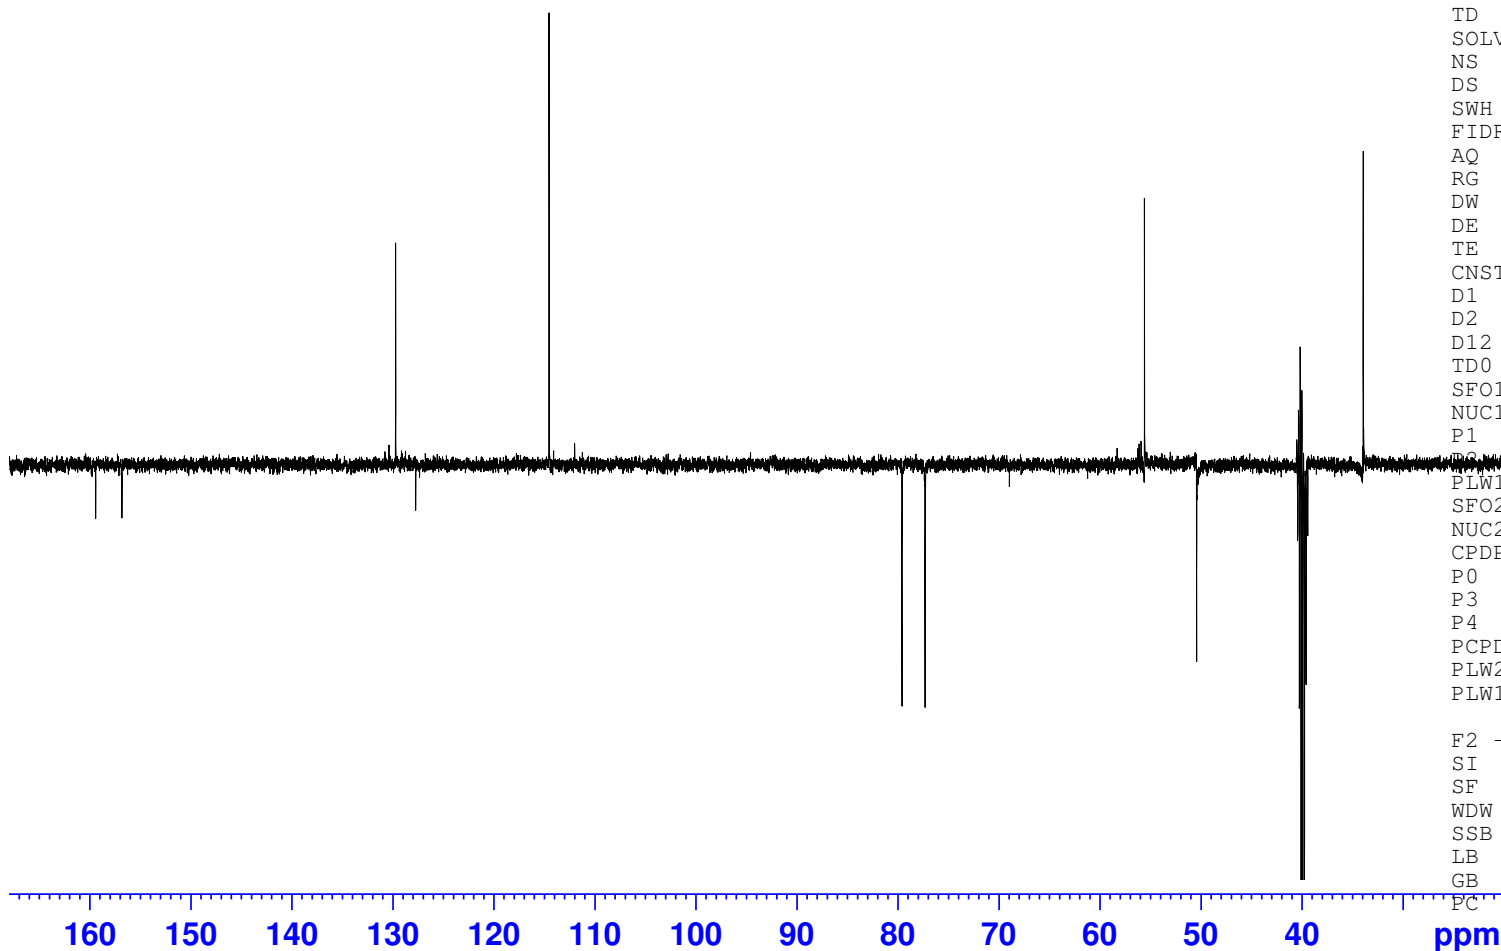

$^{13}\text{C}$  (DEPTQ135) NMR (125 MHz, DMSO- $d_6$ ) of **47**

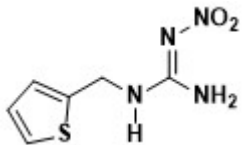

— 9.077

8.129  
7.877  
7.510  
7.500  
7.469  
7.458  
7.449  
7.144  
7.040  
7.033  
7.030  
7.023  
6.991  
6.984

— 4.568

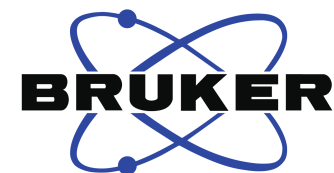

Current Data Parameters  
NAME 3  
EXPNO 2  
PROCNO 1

F2 - Acquisition Parameters  
Date\_ 20180712  
Time 18.33 h  
INSTRUM spect  
PROBHD z119470\_0187 (  
PULPROG zg30  
TD 65536  
SOLVENT DMSO  
NS 16  
DS 2  
SWH 10000.000 Hz  
FIDRES 0.305176 Hz  
AQ 3.2767999 sec  
RG 88.37  
DW 50.000 usec  
DE 12.72 usec  
TE 287.5 K  
D1 5.00000000 sec  
TD0 1  
SFO1 500.1830886 MHz  
NUC1 1H  
P0 3.33 usec  
P1 10.00 usec  
PLW1 18.10400009 W

F2 - Processing parameters  
SI 65536  
SF 500.1800000 MHz  
WDW EM  
SSB 0  
LB 0.30 Hz  
GB 0  
PC 1.00

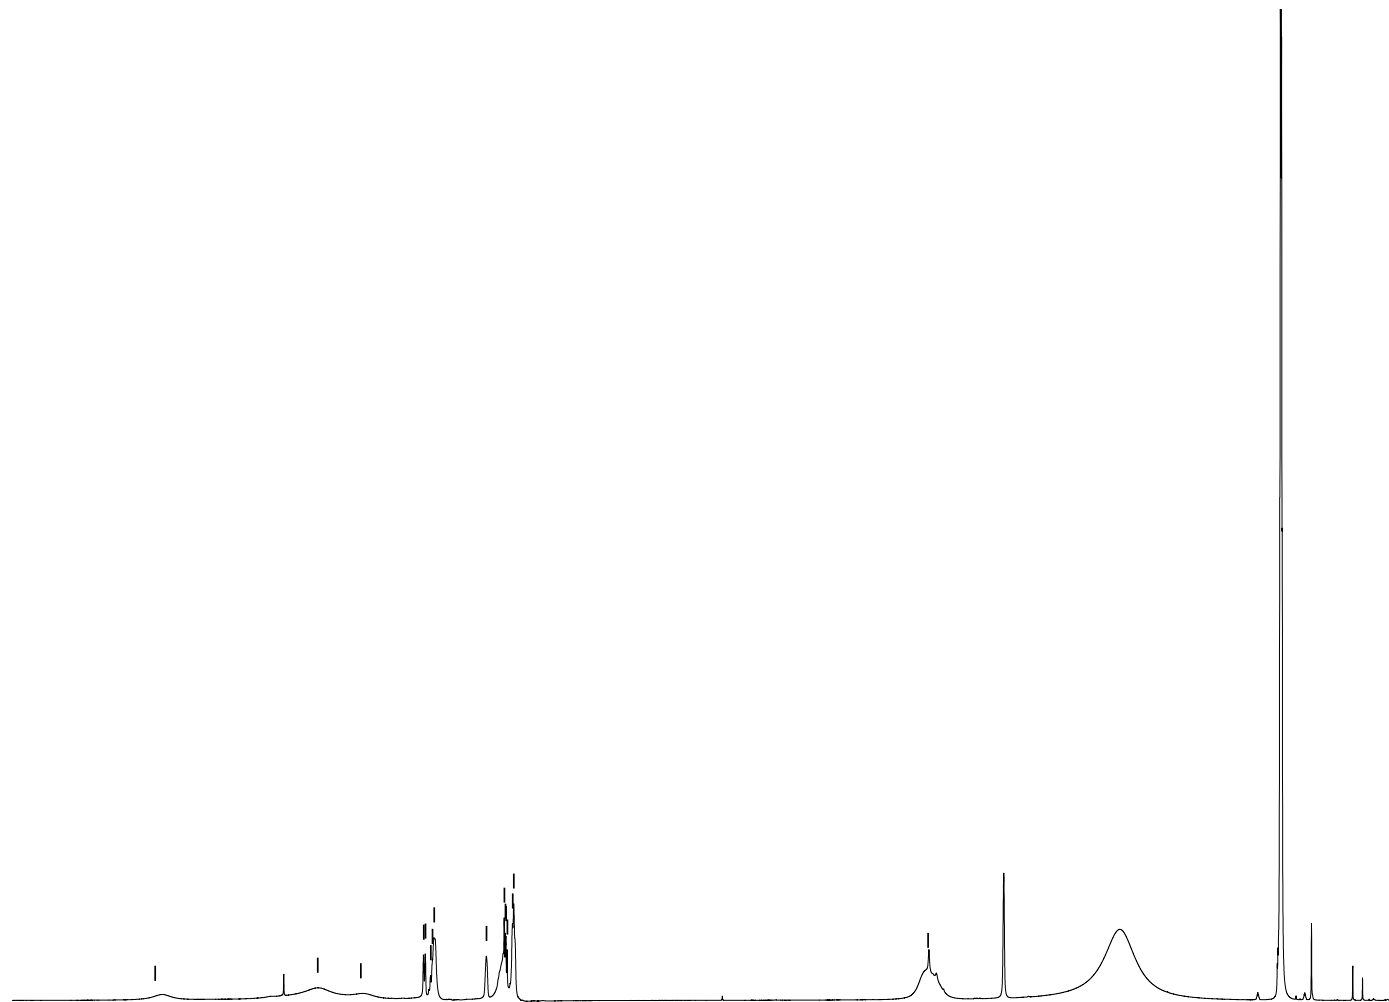

9.5 9.0 8.5 8.0 7.5 7.0 6.5 6.0 5.5 5.0 4.5 4.0 3.5 3.0 2.5 ppm

0.41

1.90

1.28

2.19

2.09



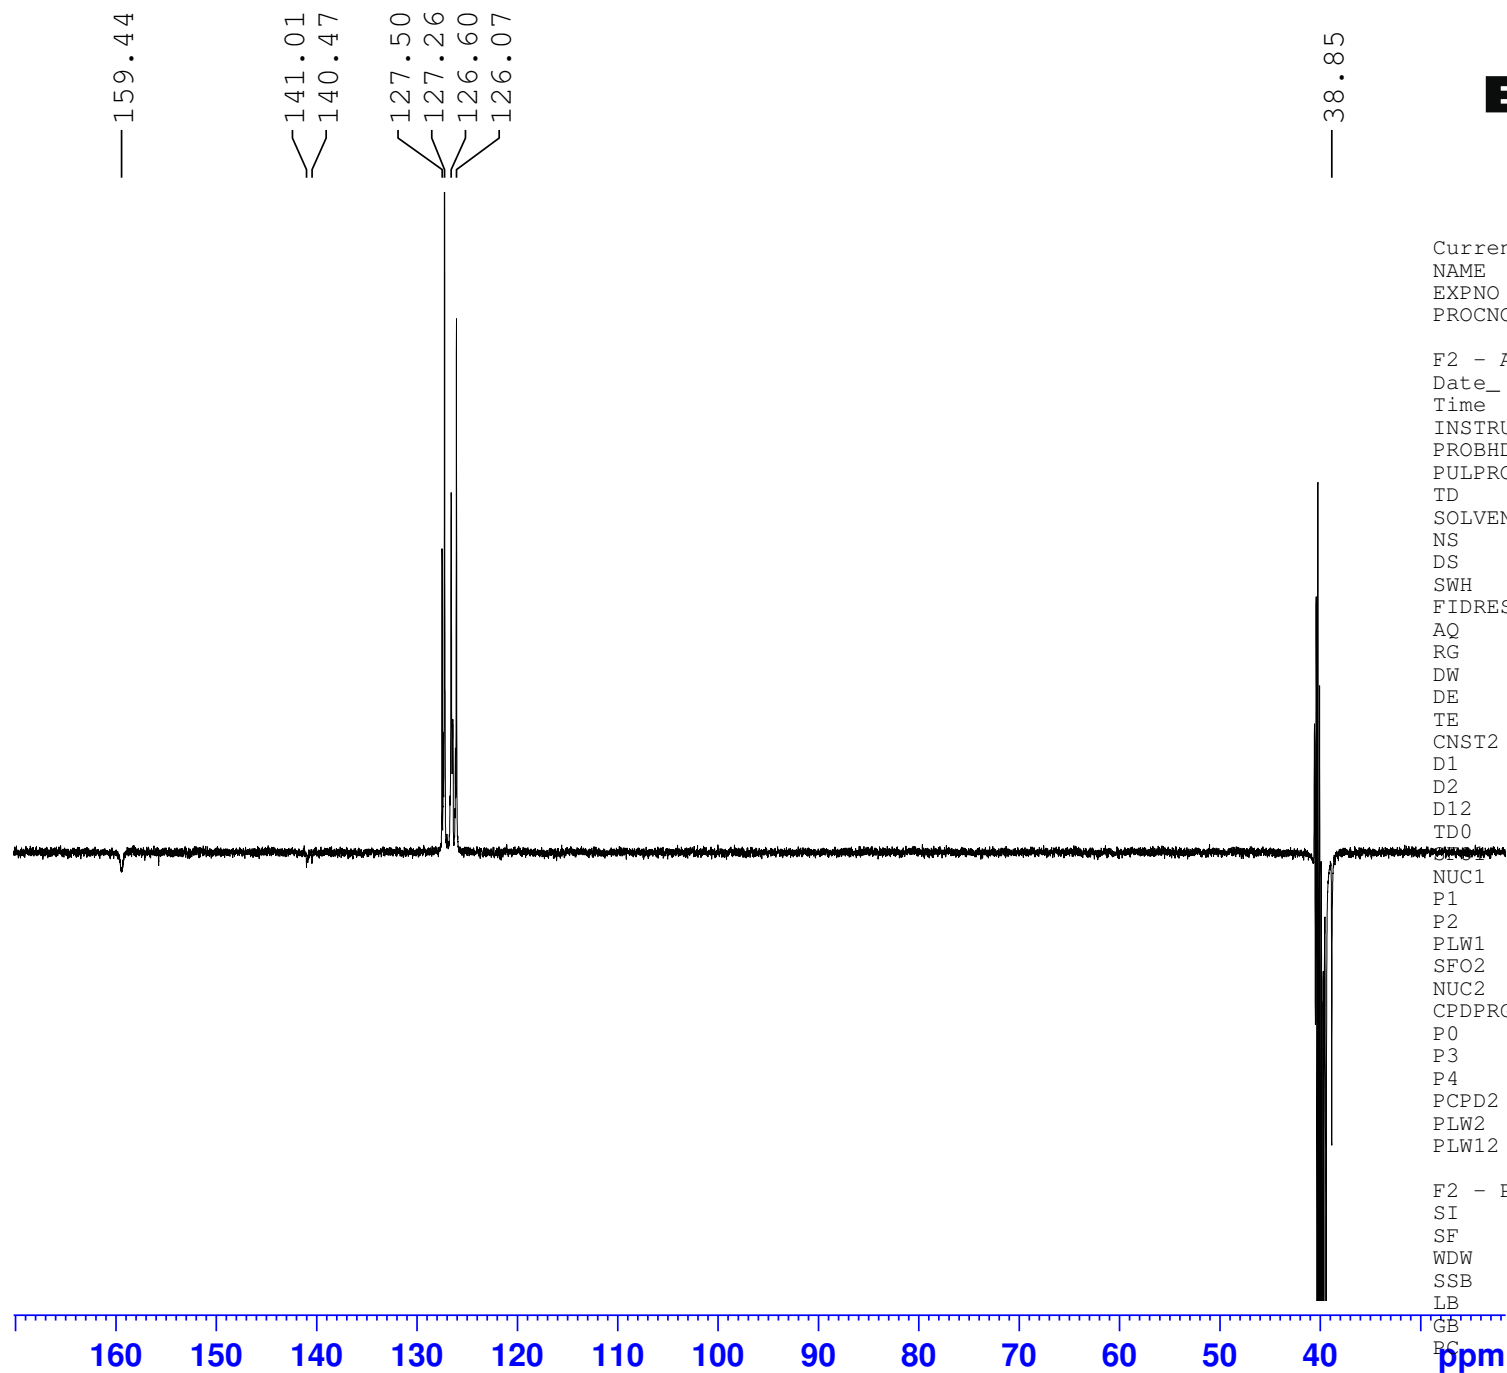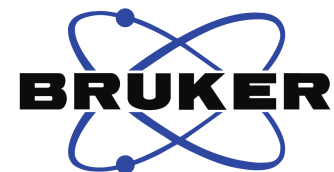

Current Data Parameters  
 NAME 3  
 EXPNO 1  
 PROCNO 1

F2 - Acquisition Parameters  
 Date\_ 20180713  
 Time 9.21 h  
 INSTRUM spect  
 PROBHD Z119470\_0187 (  
 PULPROG deptq135  
 TD 65536  
 SOLVENT DMSO  
 NS 16874  
 DS 8  
 SWH 29761.904 Hz  
 FIDRES 0.908261 Hz  
 AQ 1.1010048 sec  
 RG 192.72  
 DW 16.800 usec  
 DE 6.50 usec  
 TE 288.2 K  
 CNST2 145.0000000  
 D1 2.00000000 sec  
 D2 0.00344828 sec  
 D12 0.00002000 sec  
 TD0 1  
 SFO1 125.7829381 MHz  
 NUC1 13C  
 P1 10.00 usec  
 P2 20.00 usec  
 PLW1 82.09700012 W  
 SFO2 500.1820007 MHz  
 NUC2 1H  
 CPDPRG[2] waltz16  
 P0 15.00 usec  
 P3 10.00 usec  
 P4 20.00 usec  
 PCPD2 80.00 usec  
 PLW2 18.10400009 W  
 PLW12 0.28288001 W

F2 - Processing parameters  
 SI 32768  
 SF 125.7703610 MHz  
 WDW EM  
 SSB 0  
 LB 1.00 Hz  
 GB 0  
 BC 1.40

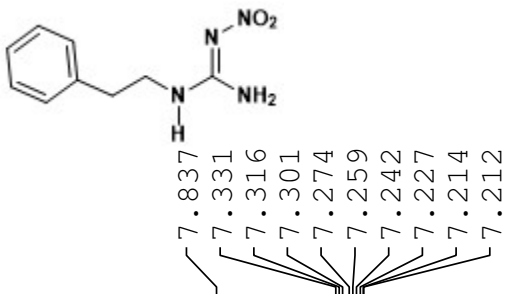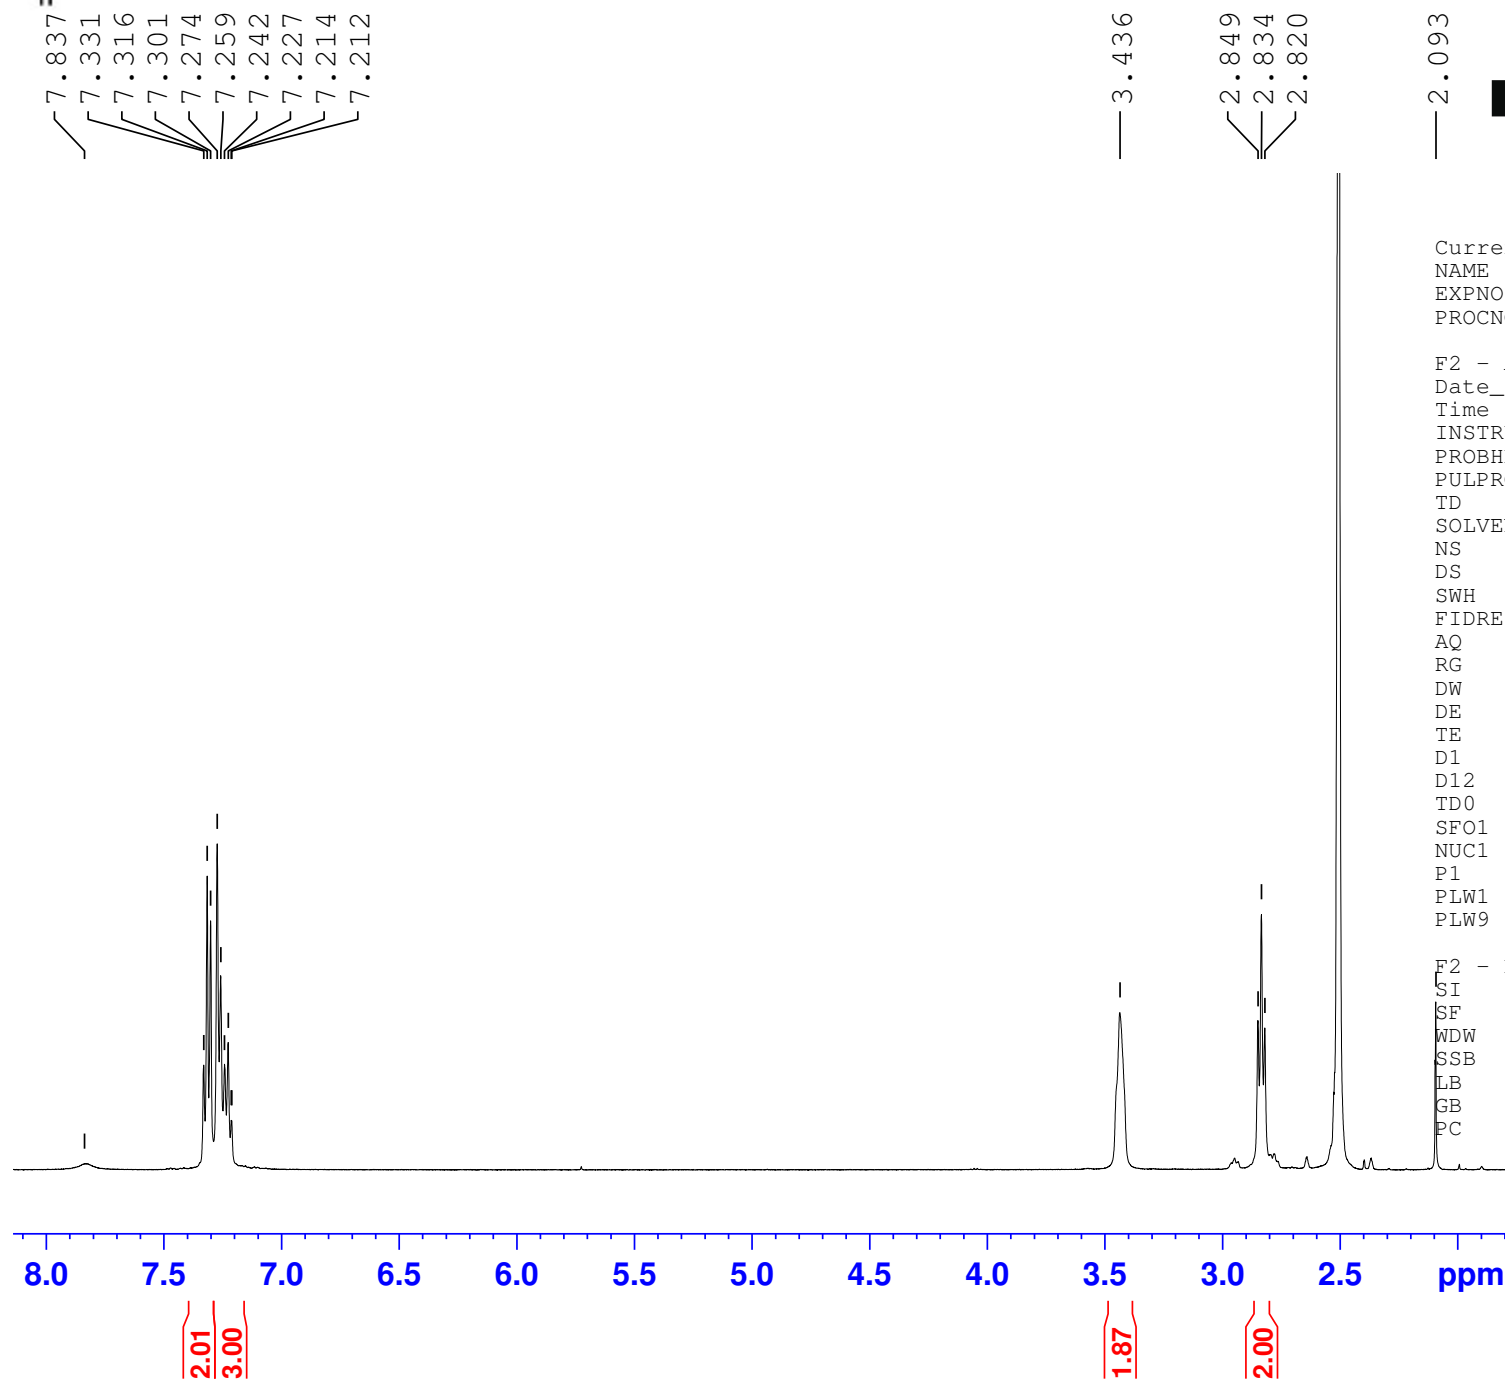

**BRUKER**

Current Data Parameters

|        |   |
|--------|---|
| NAME   | 4 |
| EXPNO  | 3 |
| PROCNO | 1 |

F2 - Acquisition Parameters

|         |                 |
|---------|-----------------|
| Date_   | 20180703        |
| Time    | 12.11 h         |
| INSTRUM | spect           |
| PROBHD  | Z119470_0187 (  |
| PULPROG | zgpgpr          |
| TD      | 32768           |
| SOLVENT | DMSO            |
| NS      | 8               |
| DS      | 4               |
| SWH     | 8012.820 Hz     |
| FIDRES  | 0.489064 Hz     |
| AQ      | 2.0447233 sec   |
| RG      | 123.82          |
| DW      | 62.400 usec     |
| DE      | 6.50 usec       |
| TE      | 323.2 K         |
| D1      | 2.00000000 sec  |
| D12     | 0.00002000 sec  |
| TD0     | 1               |
| SFO1    | 500.1816031 MHz |
| NUC1    | 1H              |
| P1      | 10.00 usec      |
| PLW1    | 18.10400009 W   |
| PLW9    | 0.00007242 W    |

F2 - Processing parameters

|     |                 |
|-----|-----------------|
| SI  | 32768           |
| SF  | 500.1800000 MHz |
| WDW | EM              |
| SSB | 0               |
| LB  | 0.30 Hz         |
| GB  | 0               |
| PC  | 1.00            |

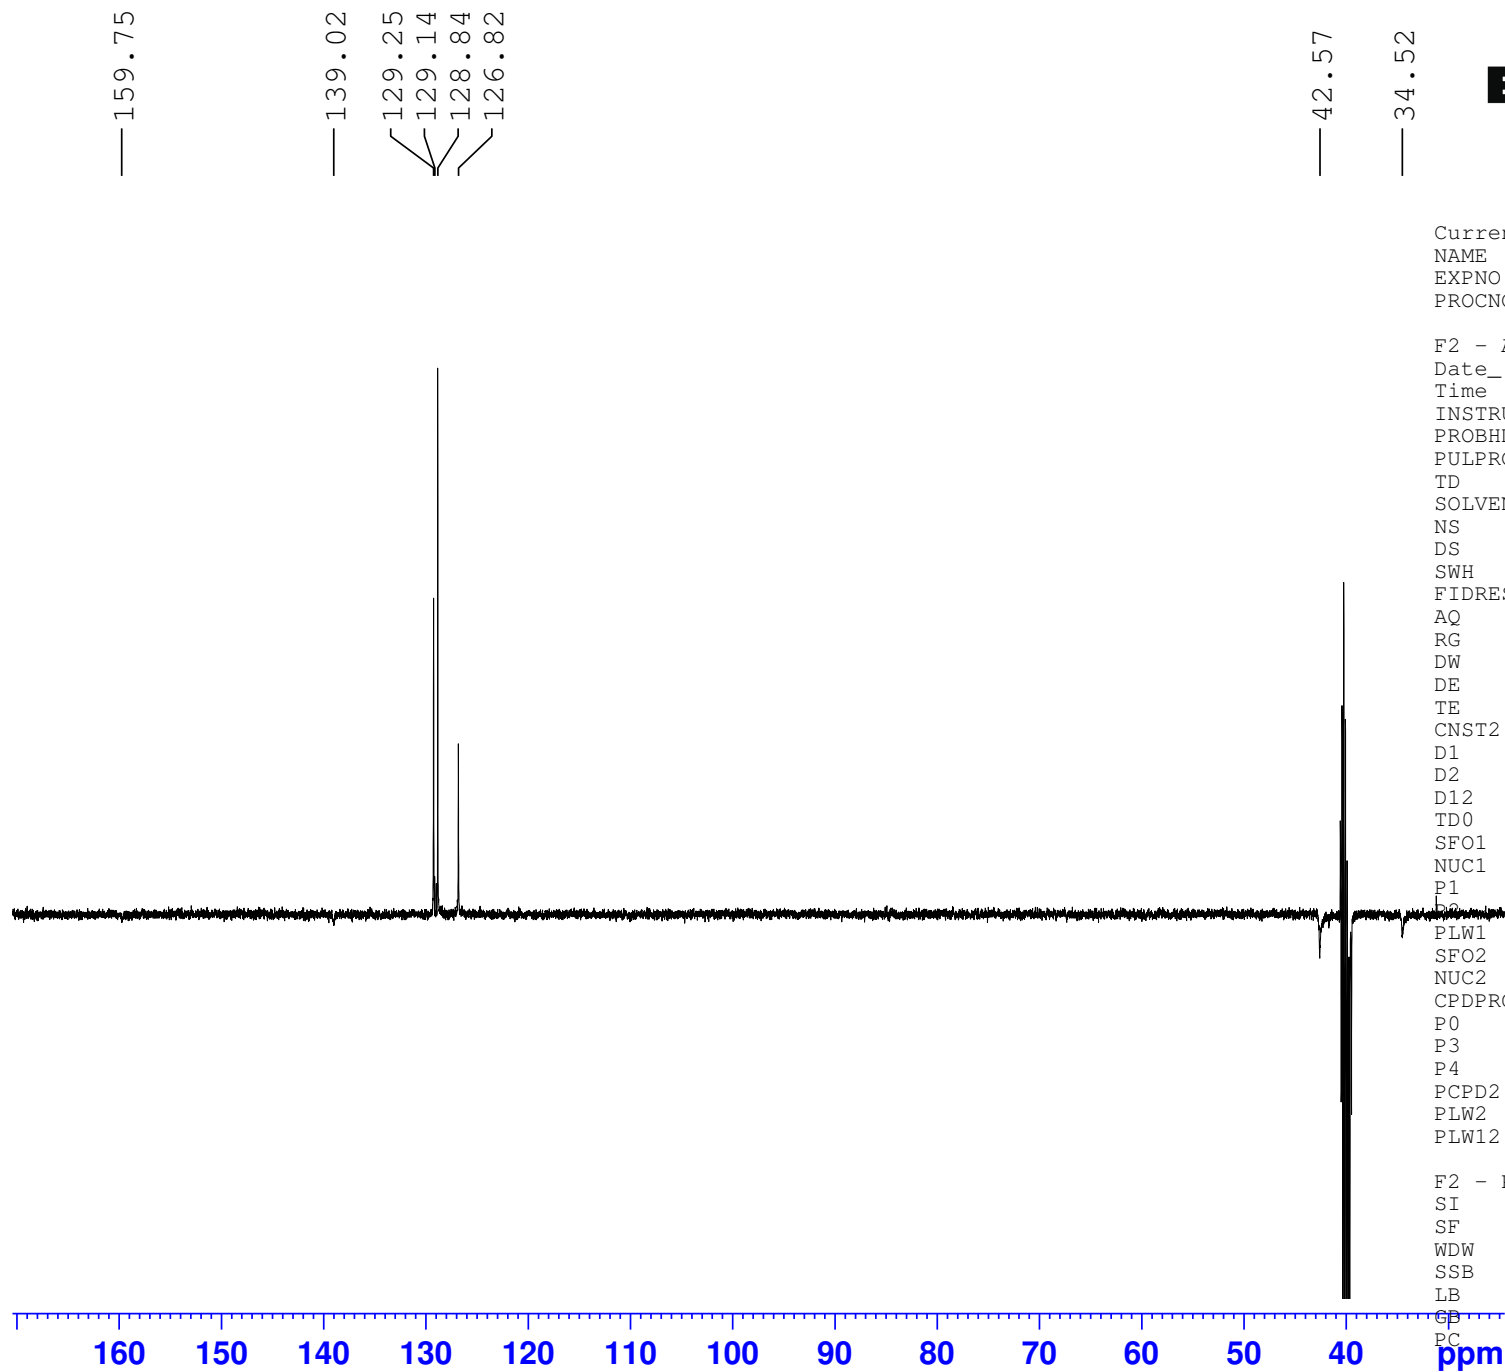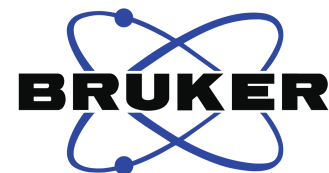

Current Data Parameters  
 NAME 4  
 EXPNO 4  
 PROCNO 1

F2 - Acquisition Parameters  
 Date\_ 20180704  
 Time 12.07 h  
 INSTRUM spect  
 PROBHD Z119470\_0187 (  
 PULPROG deptq135  
 TD 65536  
 SOLVENT DMSO  
 NS 2422  
 DS 8  
 SWH 29761.904 Hz  
 FIDRES 0.908261 Hz  
 AQ 1.1010048 sec  
 RG 192.72  
 DW 16.800 usec  
 DE 6.50 usec  
 TE 291.4 K  
 CNST2 145.0000000  
 D1 2.00000000 sec  
 D2 0.00344828 sec  
 D12 0.00002000 sec  
 TD0 1  
 SFO1 125.7829381 MHz  
 NUC1 13C  
 P1 10.00 usec  
 PLW1 82.09700012 W  
 SFO2 500.1820007 MHz  
 NUC2 1H  
 CPDPRG[2] waltz16  
 P0 15.00 usec  
 P3 10.00 usec  
 P4 20.00 usec  
 PCPD2 80.00 usec  
 PLW2 18.10400009 W  
 PLW12 0.28288001 W

F2 - Processing parameters  
 SI 32768  
 SF 125.7703610 MHz  
 WDW EM  
 SSB 0  
 LB 1.00 Hz  
 GB 0  
 PC 1.40

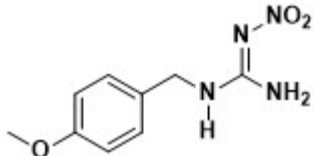

— 7.86;

7.266  
7.249  
6.935  
6.918

— 4.339

— 3.754

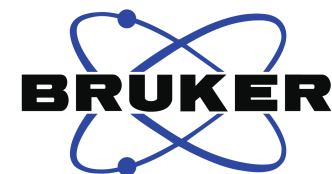

#### Current Data Parameters

NAME 5  
EXPNO 1  
PROCNO 1

#### F2 - Acquisition Parameters

Date\_ 20181204  
Time 12.00 h  
INSTRUM spect  
PROBHD Z119470\_0187 (  
PULPROG zg30  
TD 65536  
SOLVENT DMSO  
NS 16  
DS 2  
SWH 10000.000 Hz  
FIDRES 0.305176 Hz  
AQ 3.2767999 sec  
RG 95.16  
DW 50.000 usec  
DE 6.50 usec  
TE 323.1 K  
D1 1.00000000 sec  
TD0 1  
SFO1 500.1830886 MHz  
NUC1 1H  
P0 3.33 usec  
P1 10.00 usec  
PLW1 18.10400009 W

#### F2 - Processing parameters

SI 65536  
SF 500.1800000 MHz  
WDW EM  
SSB 0  
LB 0.30 Hz  
GB 0  
PC 1.00

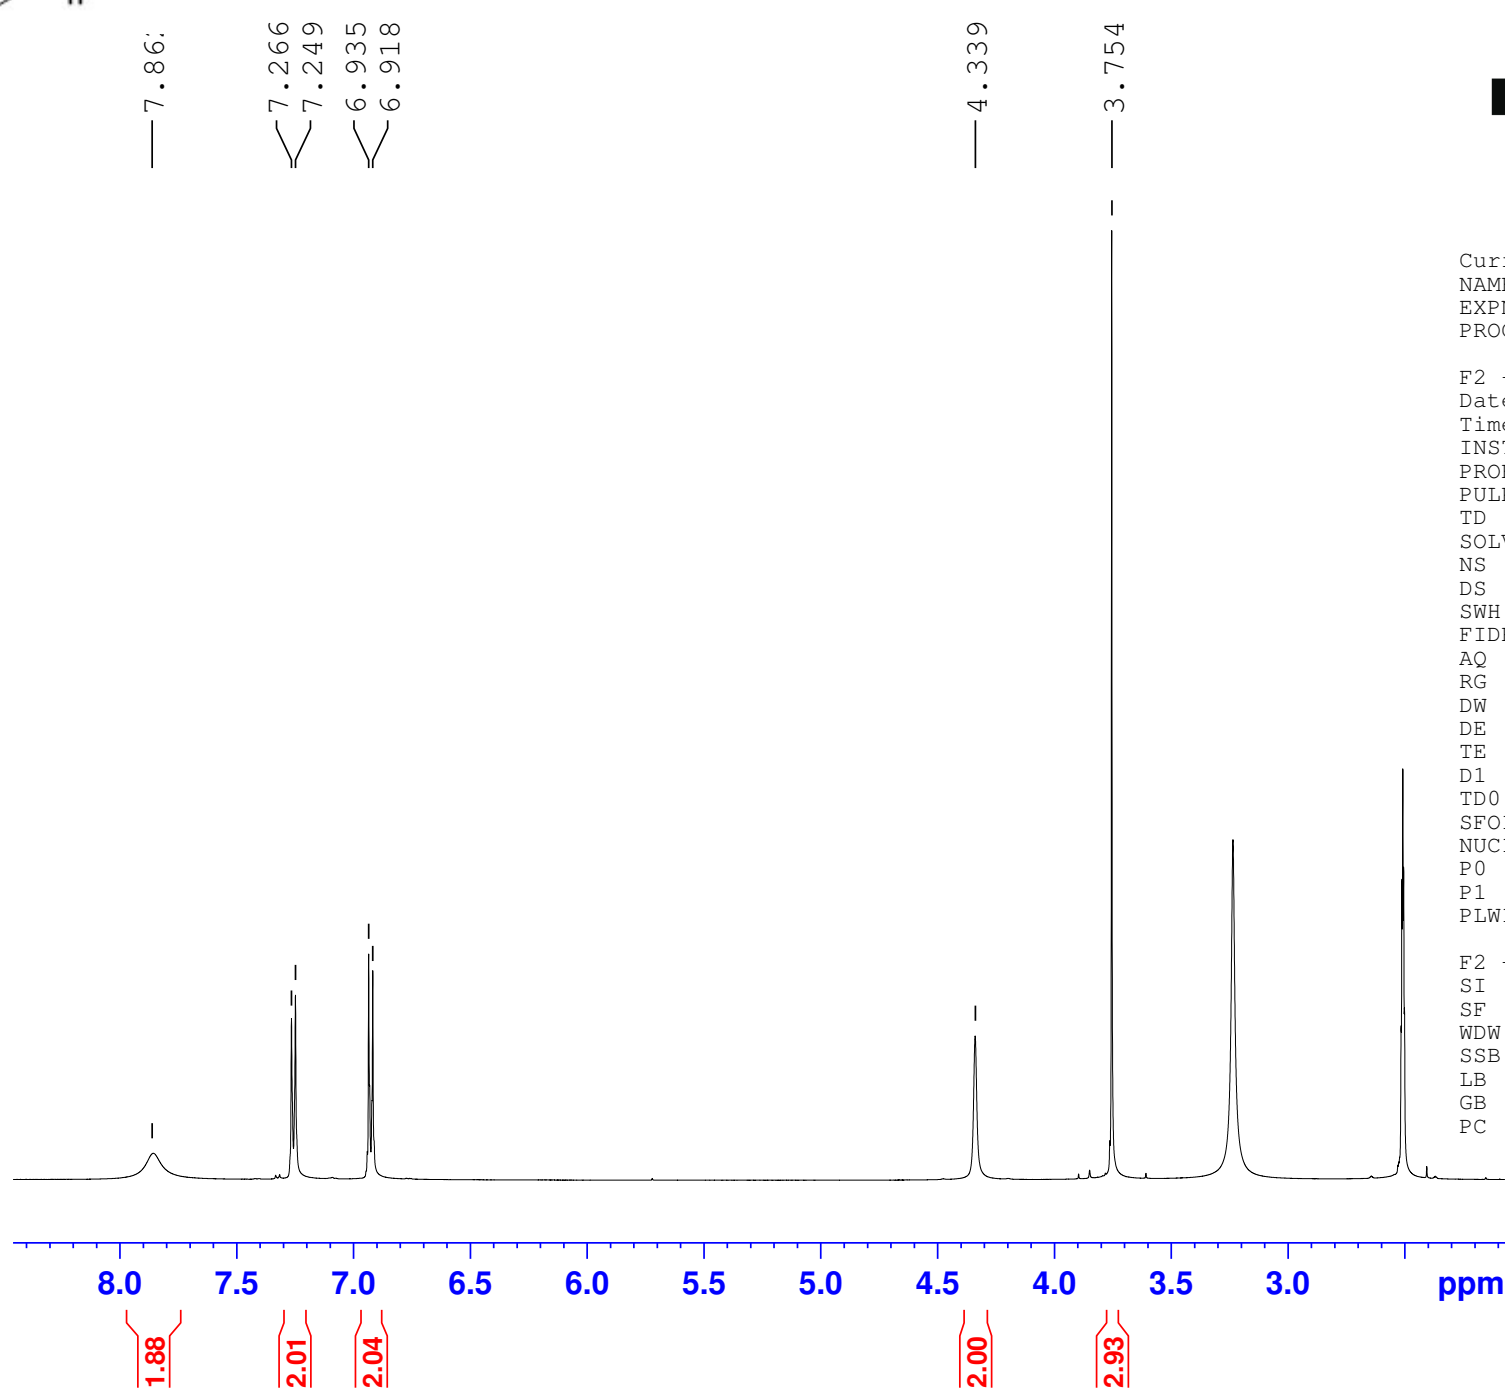

<sup>1</sup>H NMR (500 MHz, DMSO-d<sub>6</sub>, 50°C) of **5**

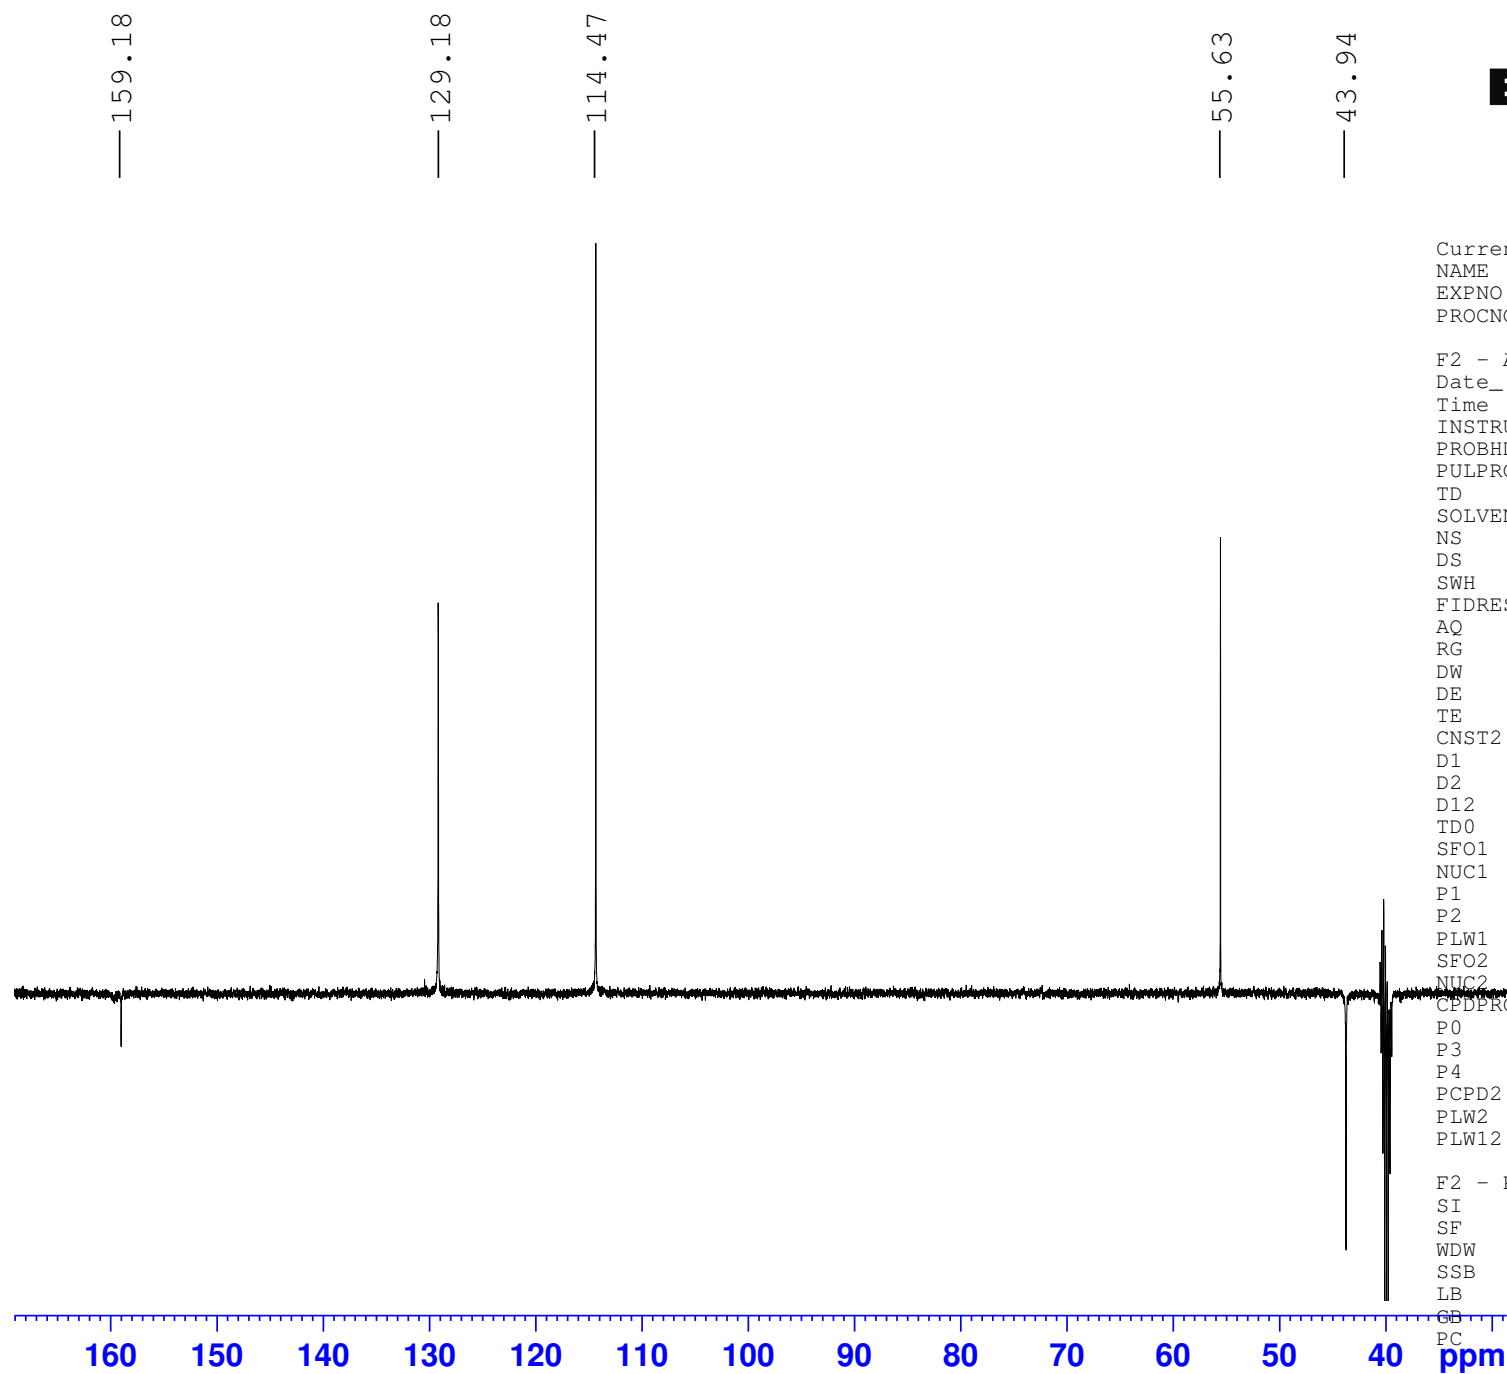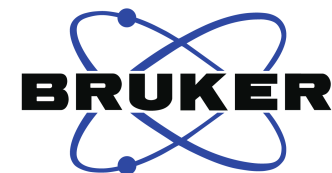

Current Data Parameters  
NAME 5  
EXPNO 2  
PROCNO 1

F2 - Acquisition Parameters  
Date\_ 20181204  
Time 15.51 h  
INSTRUM spect  
PROBHD Z119470\_0187 (  
PULPROG deptq135  
TD 65536  
SOLVENT DMSO  
NS 441  
DS 8  
SWH 29761.904 Hz  
FIDRES 0.908261 Hz  
AQ 1.1010048 sec  
RG 192.72  
DW 16.800 usec  
DE 6.50 usec  
TE 293.6 K  
CNST2 145.0000000  
D1 2.00000000 sec  
D2 0.00344828 sec  
D12 0.00002000 sec  
TD0 1  
SFO1 125.7829381 MHz  
NUC1 13C  
P1 10.00 usec  
P2 20.00 usec  
PLW1 82.09700012 W  
SFO2 500.1820007 MHz  
NUC2 1H  
CPDPRG[2] waltz16  
P0 15.00 usec  
P3 10.00 usec  
P4 20.00 usec  
PCPD2 80.00 usec  
PLW2 18.10400009 W  
PLW12 0.28288001 W

F2 - Processing parameters  
SI 32768  
SF 125.7703610 MHz  
WDW EM  
SSB 0  
LB 1.00 Hz  
GB 0  
PC 1.40

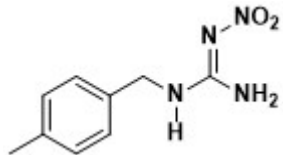

— 7.873

7.216  
7.200  
7.178  
7.162

— 4.370

— 2.298

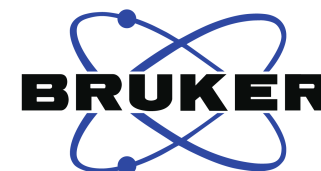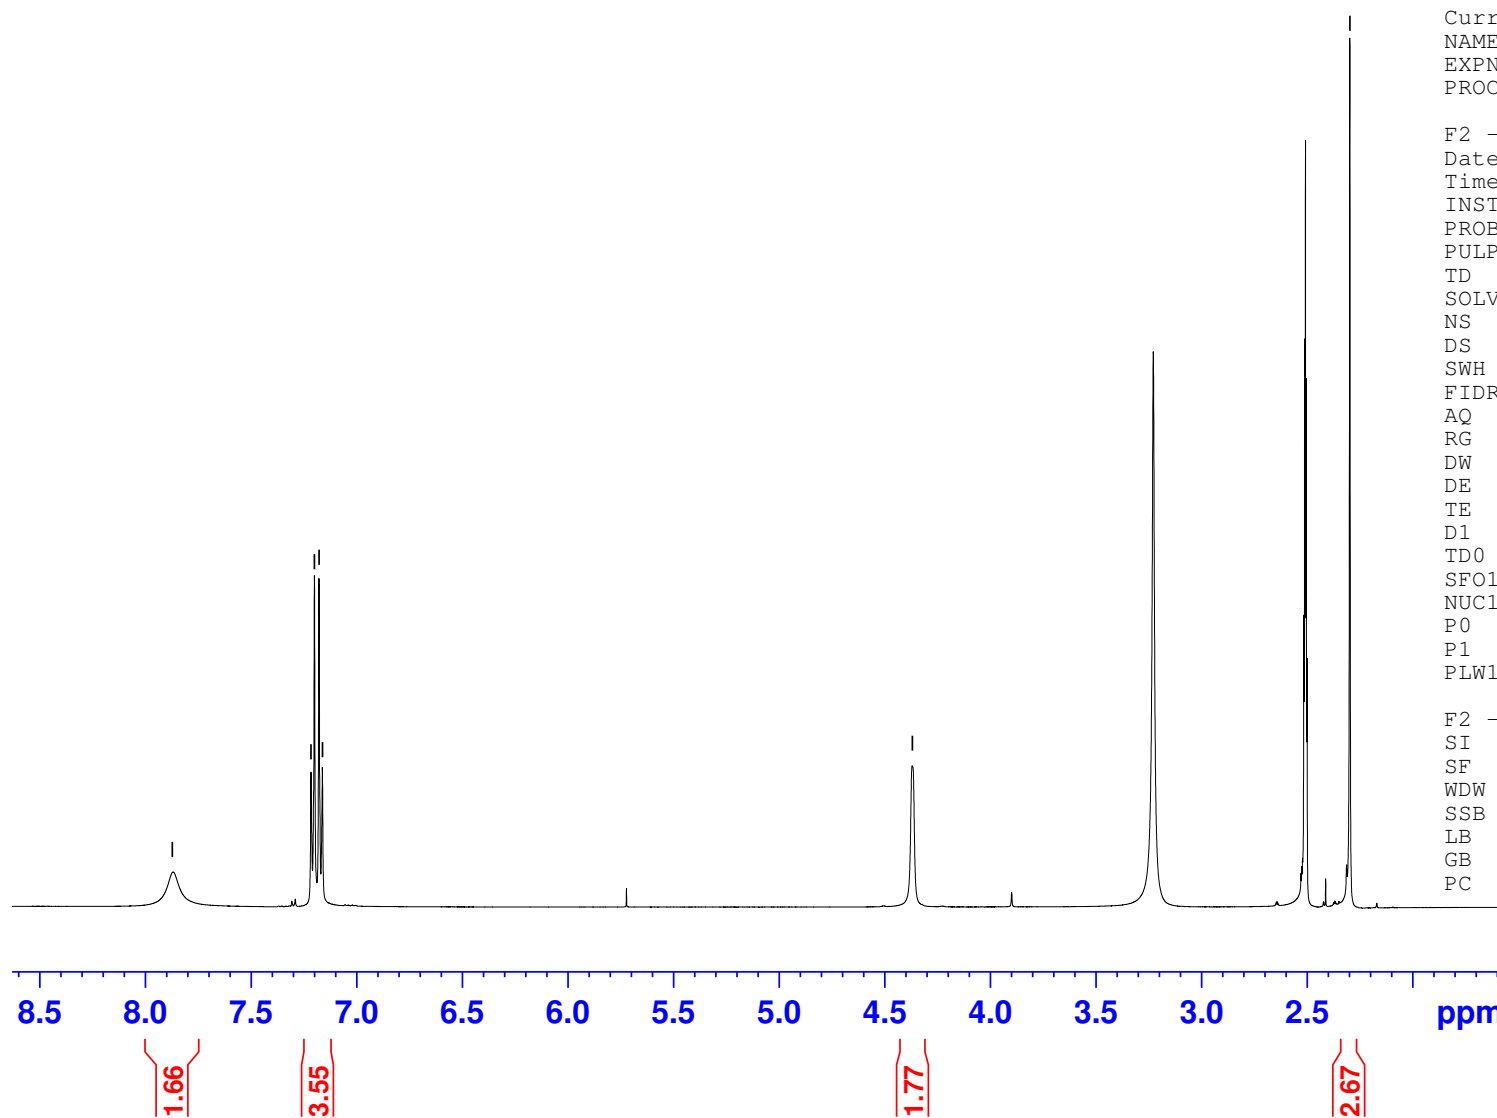

Current Data Parameters  
NAME 6  
EXPNO 3  
PROCNO 1

F2 - Acquisition Parameters  
Date\_ 20181204  
Time 10.07 h  
INSTRUM spect  
PROBHD Z119470\_0187 (   
PULPROG zg30  
TD 65536  
SOLVENT DMSO  
NS 16  
DS 2  
SWH 10000.000 Hz  
FIDRES 0.305176 Hz  
AQ 3.2767999 sec  
RG 108.3  
DW 50.000 usec  
DE 6.50 usec  
TE 323.2 K  
D1 1.00000000 sec  
TD0 1  
SFO1 500.1830886 MHz  
NUC1 1H  
P0 3.33 usec  
P1 10.00 usec  
PLW1 18.10400009 W

F2 - Processing parameters  
SI 65536  
SF 500.1800000 MHz  
WDW EM  
SSB 0  
LB 0.30 Hz  
GB 0  
PC 1.00

<sup>1</sup>H NMR (500 MHz, DMSO-d<sub>6</sub>, 50°C) of **6**

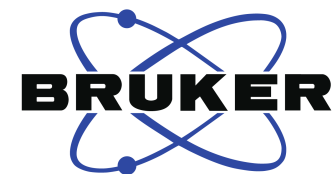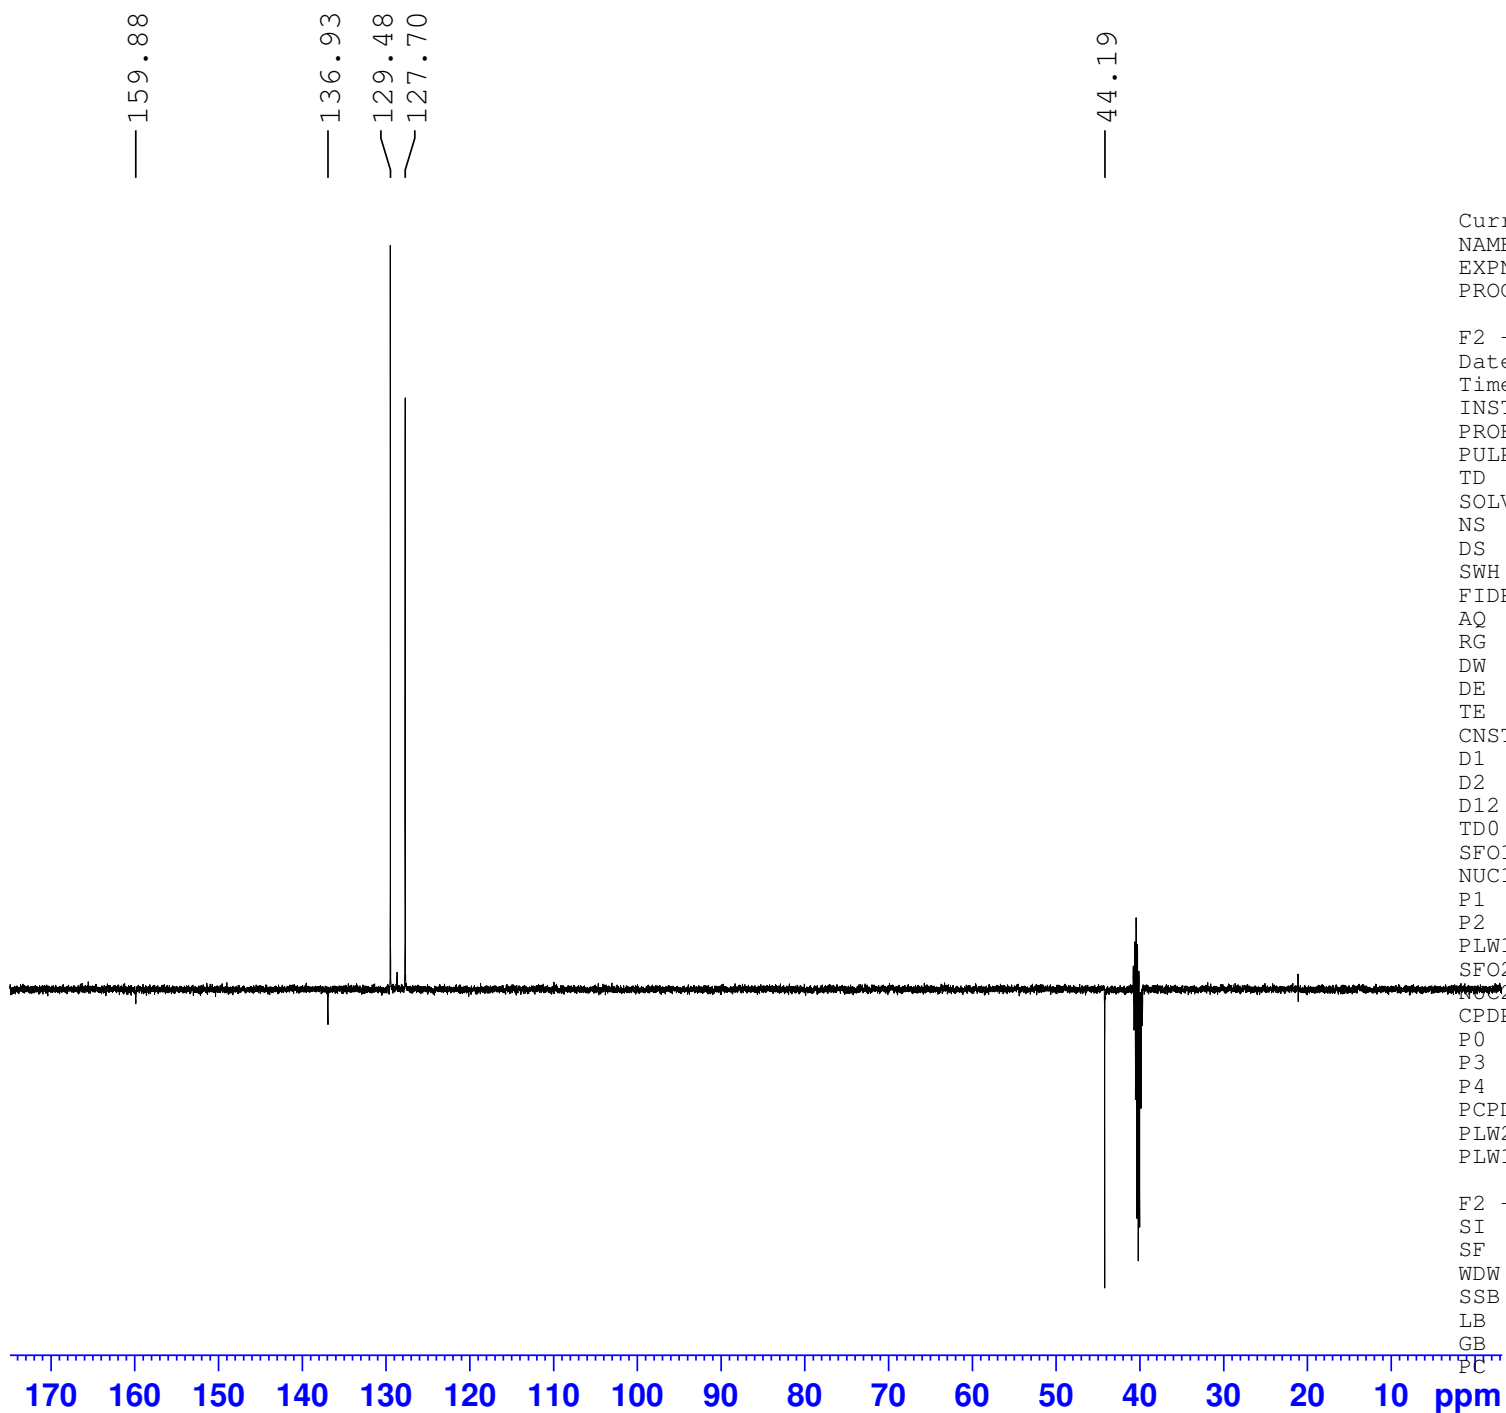

Current Data Parameters  
NAME 6  
EXPNO 2  
PROCNO 1

F2 - Acquisition Parameters  
Date\_ 20181204  
Time 10.28 h  
INSTRUM spect  
PROBHD Z119470\_0187 (   
PULPROG deptq135  
TD 65536  
SOLVENT DMSO  
NS 366  
DS 8  
SWH 29761.904 Hz  
FIDRES 0.908261 Hz  
AQ 1.1010048 sec  
RG 192.72  
DW 16.800 usec  
DE 6.50 usec  
TE 323.2 K  
CNST2 145.0000000  
D1 2.00000000 sec  
D2 0.00344828 sec  
D12 0.00002000 sec  
TD0 1  
SFO1 125.7829381 MHz  
NUC1 13C  
P1 10.00 usec  
P2 20.00 usec  
PLW1 82.09700012 W  
SFO2 500.1820007 MHz  
NUC2 1H  
CPDPRG[2] waltz16  
P0 15.00 usec  
P3 10.00 usec  
P4 20.00 usec  
PCPD2 80.00 usec  
PLW2 18.10400009 W  
PLW12 0.28288001 W

F2 - Processing parameters  
SI 32768  
SF 125.7703610 MHz  
WDW EM  
SSB 0  
LB 1.00 Hz  
GB 0  
PC 1.40

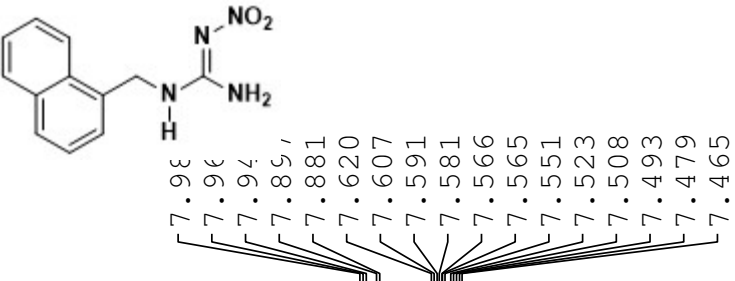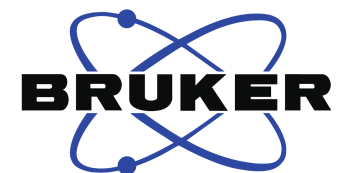

Current Data Parameters  
 NAME 7  
 EXPNO 1  
 PROCNO 1

F2 - Acquisition Parameters  
 Date\_ 20181204  
 Time 13.21 h  
 INSTRUM spect  
 PROBHD Z119470\_0187 (   
 PULPROG zg30  
 TD 65536  
 SOLVENT DMSO  
 NS 16  
 DS 2  
 SWH 10000.000 Hz  
 FIDRES 0.305176 Hz  
 AQ 3.2767999 sec  
 RG 139.09  
 DW 50.000 usec  
 DE 6.50 usec  
 TE 323.2 K  
 D1 1.00000000 sec  
 TD0 1  
 SFO1 500.1830886 MHz  
 NUC1 1H  
 P0 3.33 usec  
 P1 10.00 usec  
 PLW1 18.10400009 W

F2 - Processing parameters  
 SI 65536  
 SF 500.1800000 MHz  
 WDW EM  
 SSB 0  
 LB 0.30 Hz  
 GB 0  
 PC 1.00

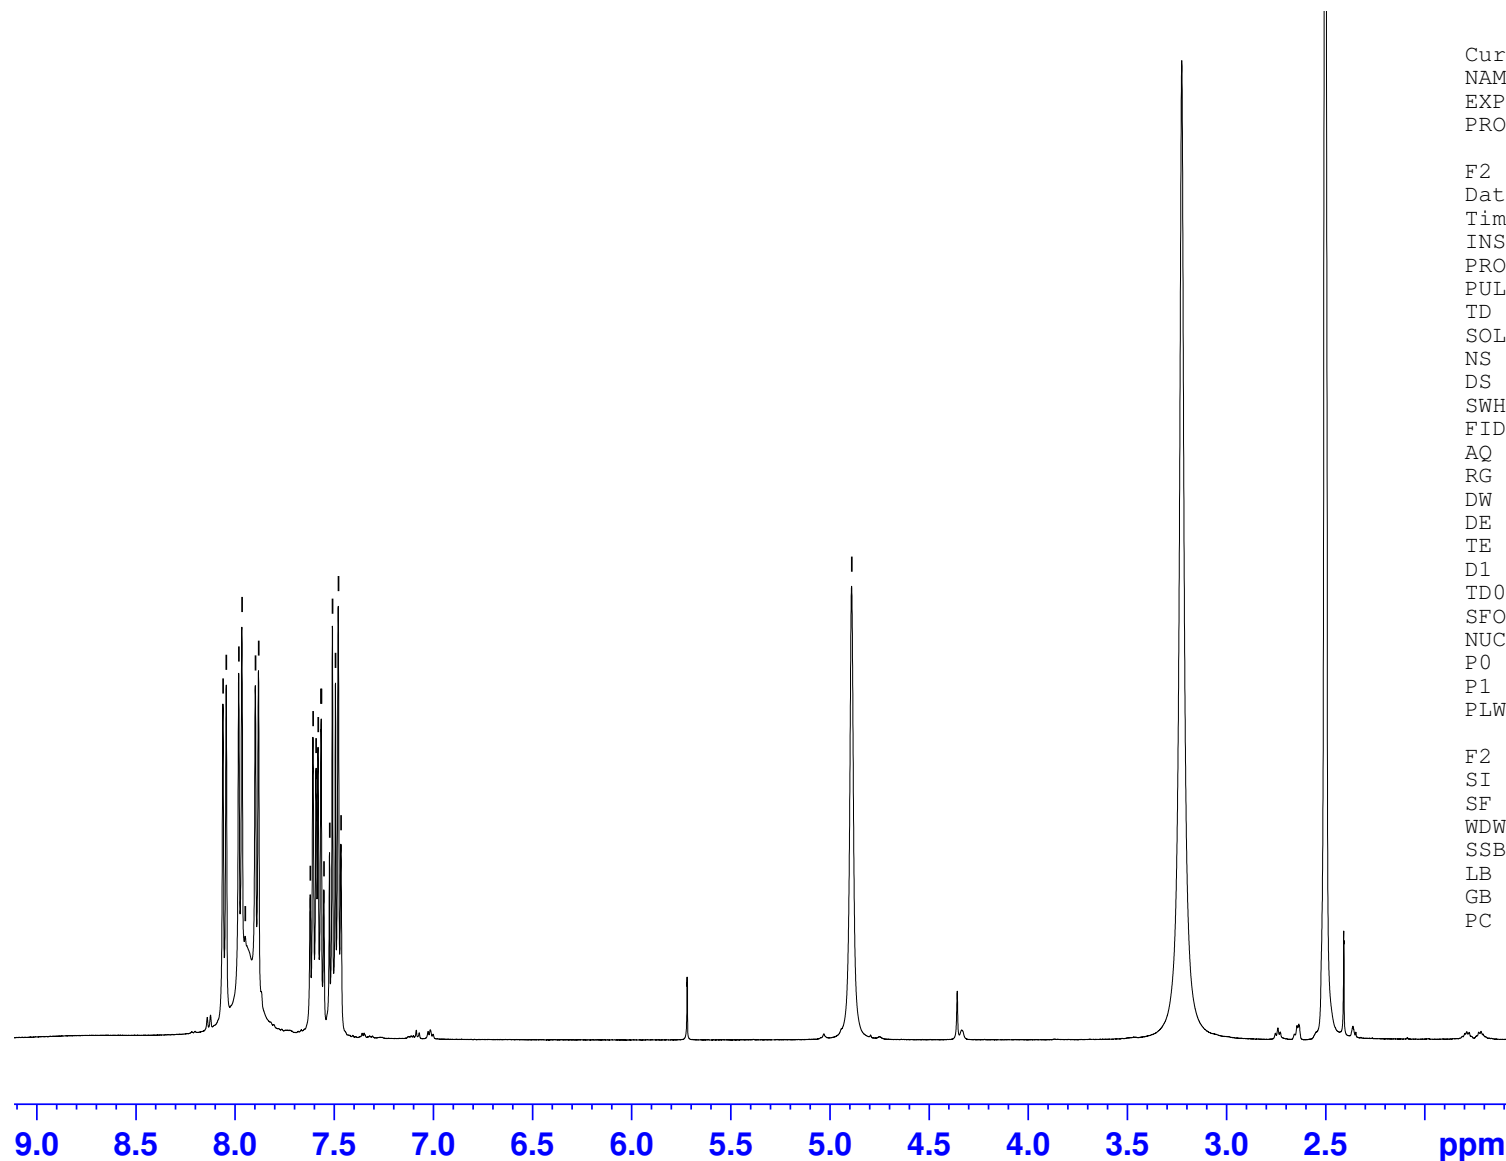

<sup>1</sup>H NMR (500 MHz, DMSO-d<sub>6</sub>, 50°C) of 7



—159.96

133.88  
131.18  
129.05  
128.42  
126.87  
126.41  
125.91  
123.73

—42.70

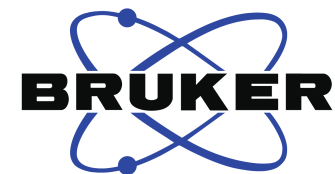

Current Data Parameters  
NAME 7  
EXPNO 2  
PROCNO 1

F2 - Acquisition Parameters  
Date\_ 20181204  
Time 14.43 h  
INSTRUM spect  
PROBHD Z119470\_0187 (  
PULPROG deptq135  
TD 65536  
SOLVENT DMSO  
NS 1536  
DS 8  
SWH 29761.904 Hz  
FIDRES 0.908261 Hz  
AQ 1.1010048 sec  
RG 192.72  
DW 16.800 usec  
DE 6.50 usec  
TE 323.1 K  
CNST2 145.000000  
D1 2.0000000 sec  
D2 0.00344828 sec  
D12 0.00002000 sec  
TD0 1  
SFO1 125.7829381 MHz  
NUC1 13C  
P1 10.00 usec  
P2 20.00 usec  
PLW1 82.09700012 W  
SFO2 500.1820007 MHz  
NUC2 1H  
CPDPRG[2] waltz16  
P0 15.00 usec  
P3 10.00 usec  
P4 20.00 usec  
PCPD2 80.00 usec  
PLW2 18.10400009 W  
PLW12 0.28288001 W

F2 - Processing parameters  
SI 32768  
SF 125.7703610 MHz  
WDW EM  
SSB 0  
LB 1.00 Hz  
GB 0  
Hc 1.40

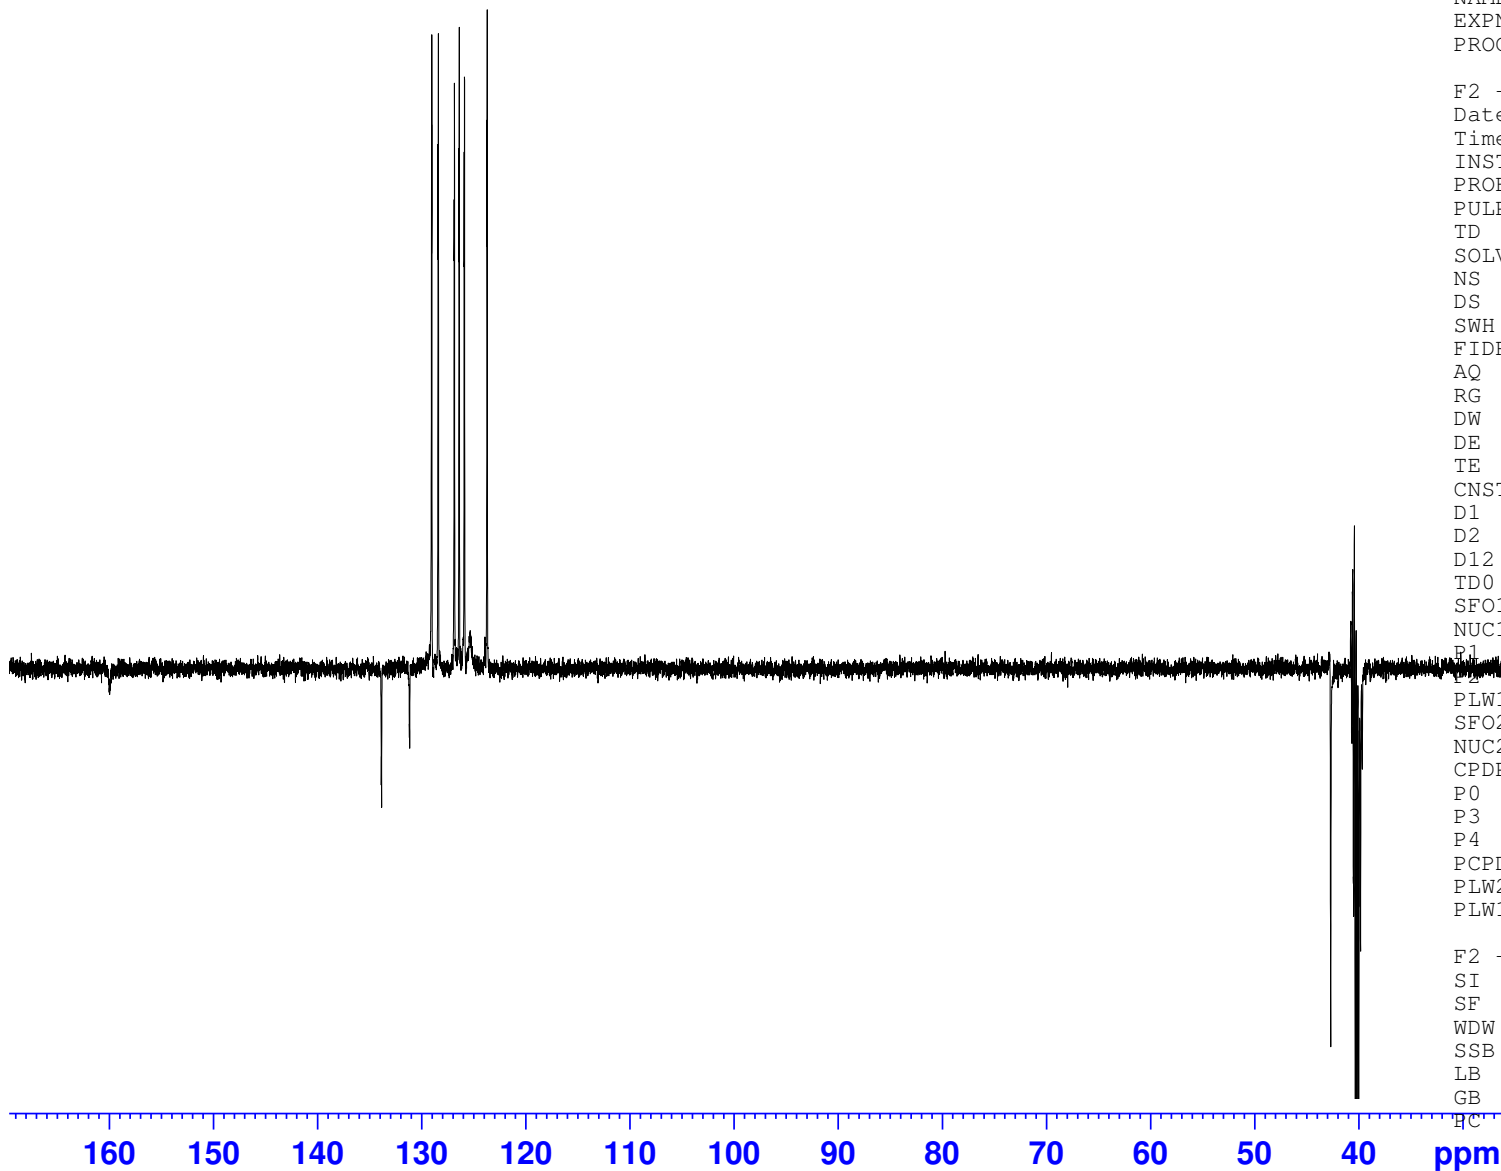

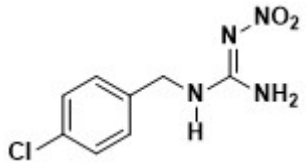

7.951  
7.434  
7.420  
7.404  
7.340  
7.323

4.402

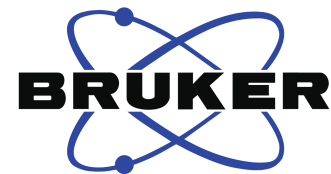

Current Data Parameters  
NAME 8  
EXPNO 1  
PROCNO 1

F2 - Acquisition Parameters  
Date\_ 20181204  
Time 9.21 h  
INSTRUM spect  
PROBHD Z119470\_0187 (  
PULPROG zg30  
TD 65536  
SOLVENT DMSO  
NS 16  
DS 2  
SWH 10000.000 Hz  
FIDRES 0.305176 Hz  
AQ 3.2767999 sec  
RG 95.16  
DW 50.000 usec  
DE 6.50 usec  
TE 323.2 K  
D1 1.00000000 sec  
TD0 1  
SFO1 500.1830886 MHz  
NUC1 1H  
P0 3.33 usec  
P1 10.00 usec  
PLW1 18.10400009 W

F2 - Processing parameters  
SI 65536  
SF 500.1800000 MHz  
WDW EM  
SSB 0  
LB 0.30 Hz  
GB 0  
PC 1.00

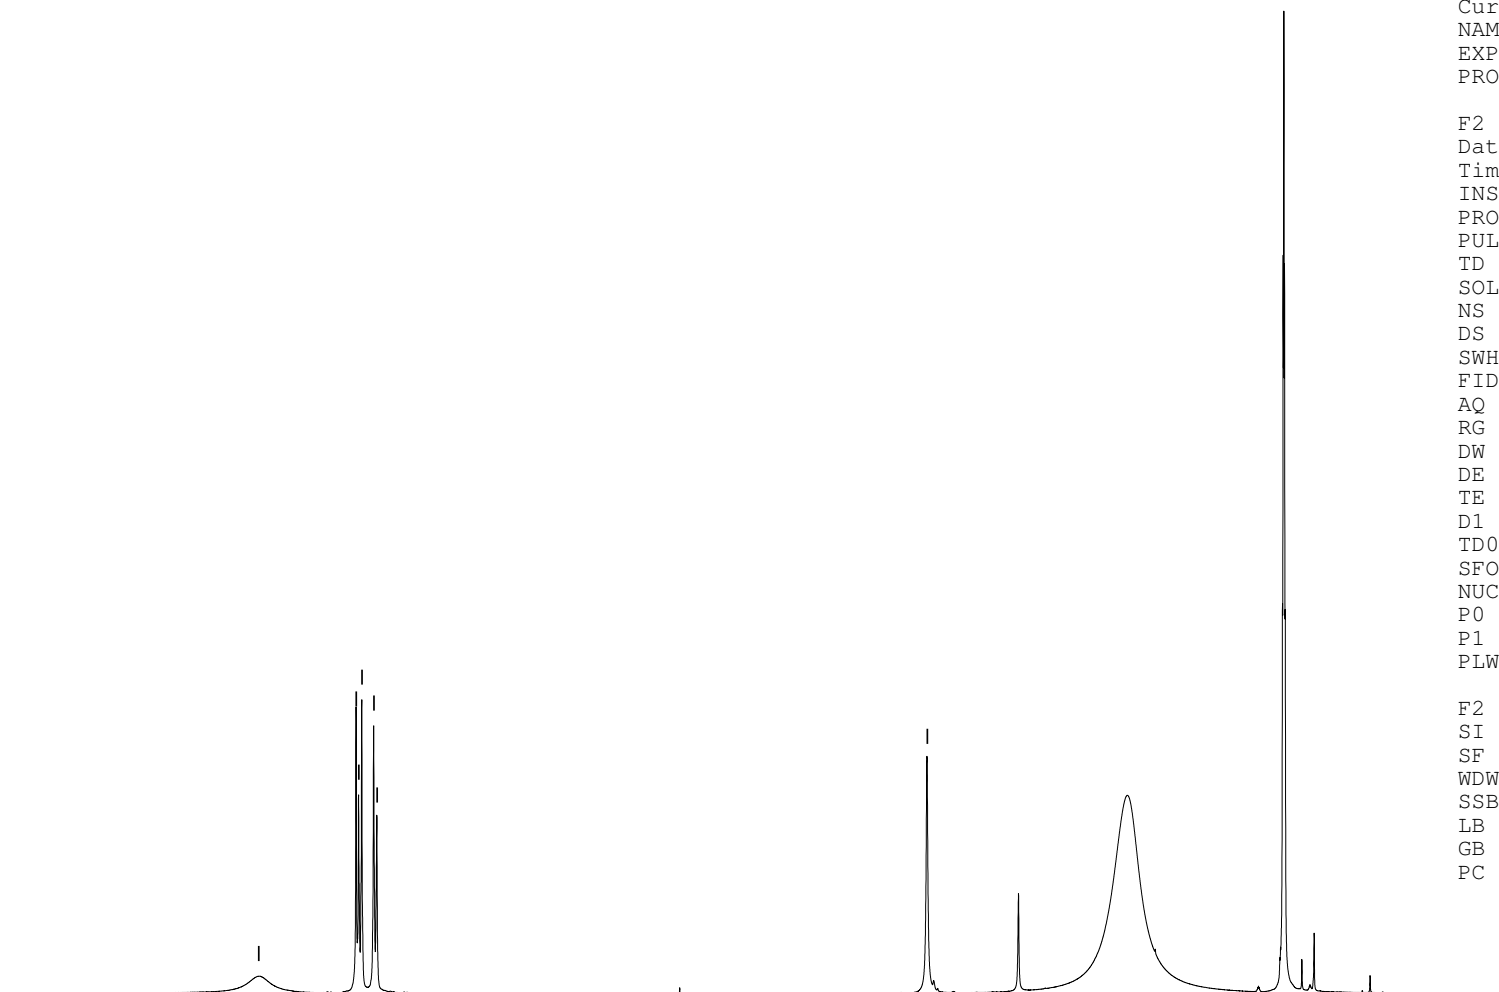

9.0 8.5 8.0 7.5 7.0 6.5 6.0 5.5 5.0 4.5 4.0 3.5 3.0 2.5 2.0 ppm

1.47  
2.44  
1.66

1.61

<sup>1</sup>H NMR (500 MHz, DMSO-d<sub>6</sub>, 50°C) of **8**

—159.92

132.33  
129.53  
128.84

—43.65

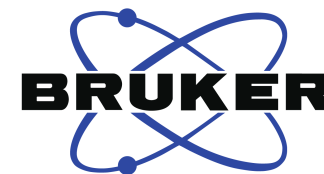

Current Data Parameters  
NAME 8  
EXPNO 2  
PROCNO 1

F2 - Acquisition Parameters  
Date\_ 20181204  
Time 9.54 h  
INSTRUM spect  
PROBHD z119470\_0187 (  
PULPROG deptq135  
TD 65536  
SOLVENT DMSO  
NS 578  
DS 8  
SWH 29761.904 Hz  
FIDRES 0.908261 Hz  
AQ 1.1010048 sec  
RG 192.72  
DW 16.800 usec  
DE 6.50 usec  
TE 323.1 K  
CNST2 145.000000  
D1 2.00000000 sec  
D2 0.00344828 sec  
D12 0.00002000 sec  
TD0 1  
SF01 125.7829381 MHz  
NUC1 13C  
P1 10.00 usec  
P2 20.00 usec  
PLW1 82.09700012 W  
SF02 500.1820007 MHz  
NUC2 1H  
CPDPRG[2] waltz16  
P0 15.00 usec  
P3 10.00 usec  
P4 20.00 usec  
PCPD2 80.00 usec  
PLW2 18.10400009 W  
PLW12 0.28288001 W

F2 - Processing parameters  
SI 32768  
SF 125.7703610 MHz  
WDW EM  
SSB 0  
LB 1.00 Hz  
GB 0  
PC 1.40

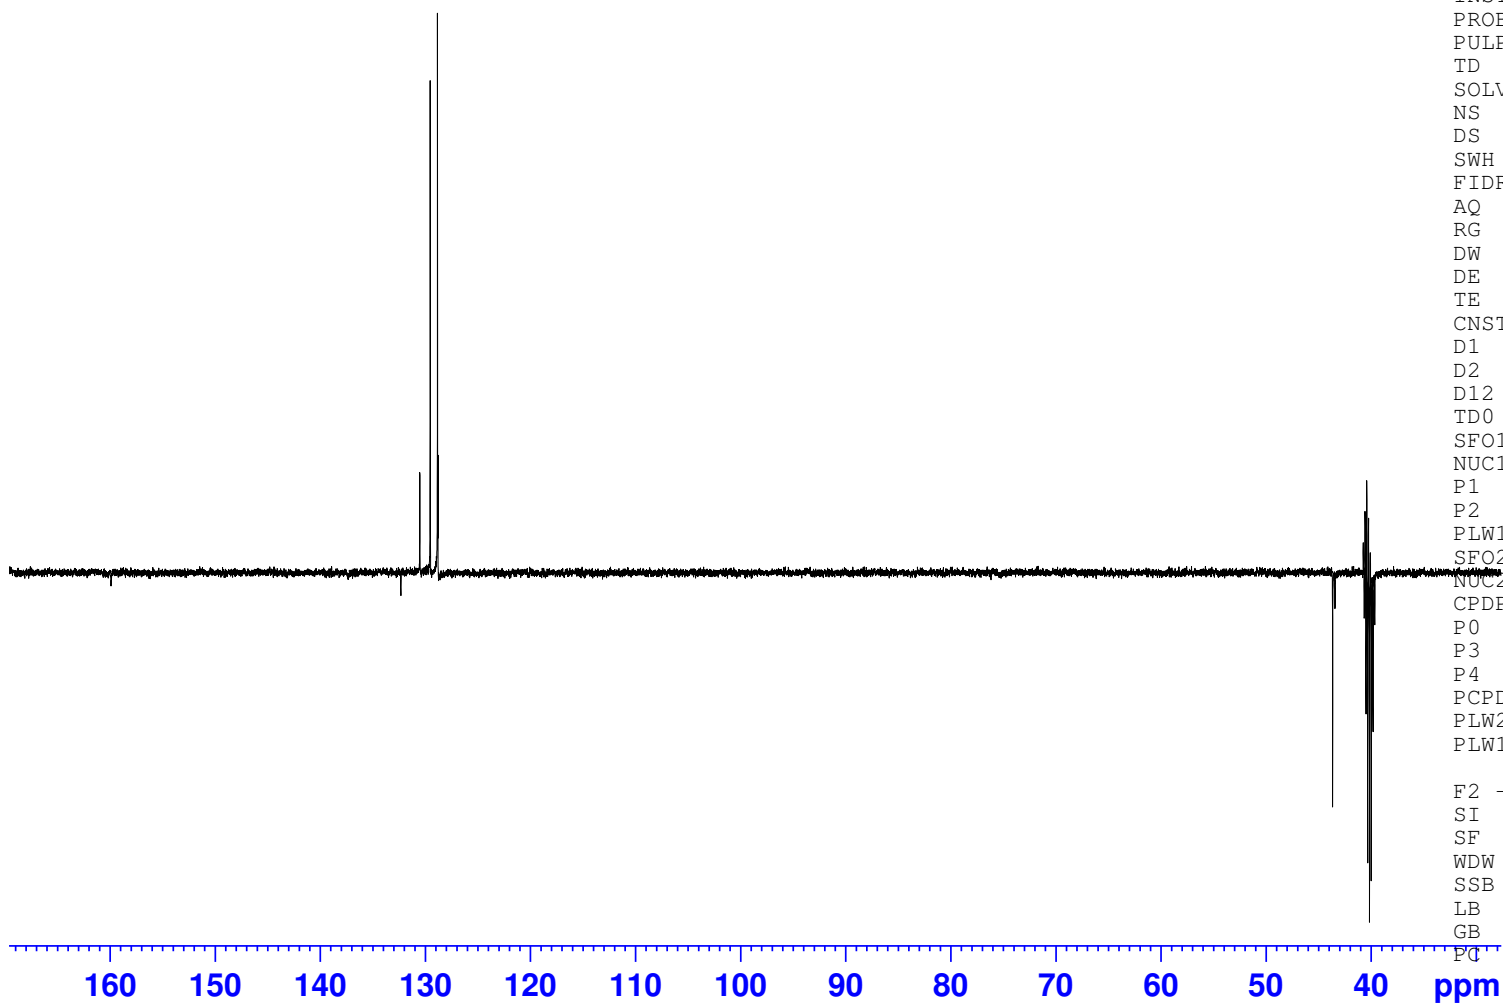

<sup>13</sup>C (DEPTQ135) NMR (125 MHz, DMSO-d<sub>6</sub>, 50°C) of **8**

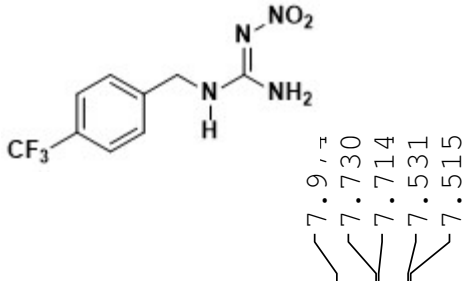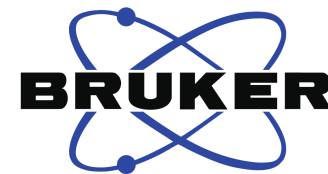

Current Data Parameters  
 NAME 9  
 EXPNO 2  
 PROCNO 1

F2 - Acquisition Parameters  
 Date\_ 20180816  
 Time 20.01 h  
 INSTRUM spect  
 PROBHD z119470\_0187 (  
 PULPROG zg30  
 TD 65536  
 SOLVENT DMSO  
 NS 16  
 DS 2  
 SWH 10000.000 Hz  
 FIDRES 0.305176 Hz  
 AQ 3.2767999 sec  
 RG 88.37  
 DW 50.000 usec  
 DE 6.50 usec  
 TE 323.4 K  
 D1 1.00000000 sec  
 TD0 1  
 SF01 500.1830886 MHz  
 NUC1 1H  
 P0 3.33 usec  
 P1 10.00 usec  
 PLW1 18.10400009 W

F2 - Processing parameters  
 SI 65536  
 SF 500.1800000 MHz  
 WDW EM  
 SSB 0  
 LB 0.30 Hz  
 GB 0  
 PC 1.00

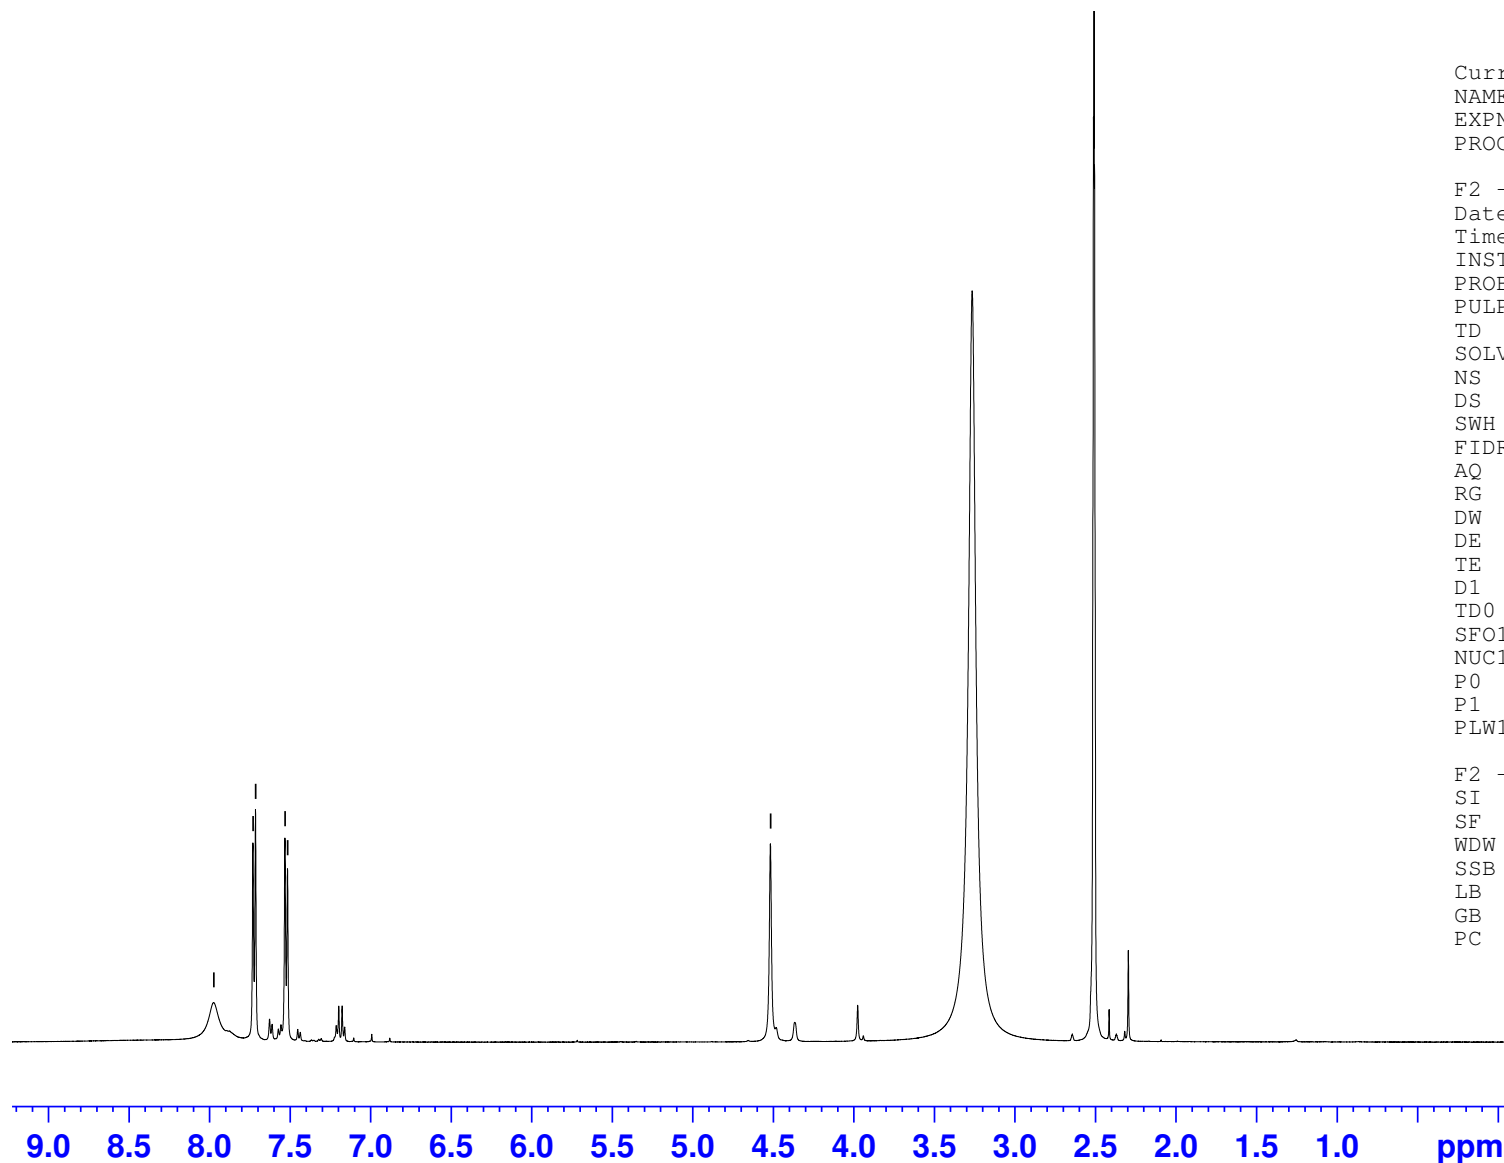

<sup>1</sup>H NMR (500 MHz, DMSO-d<sub>6</sub>, 50°C) of 9

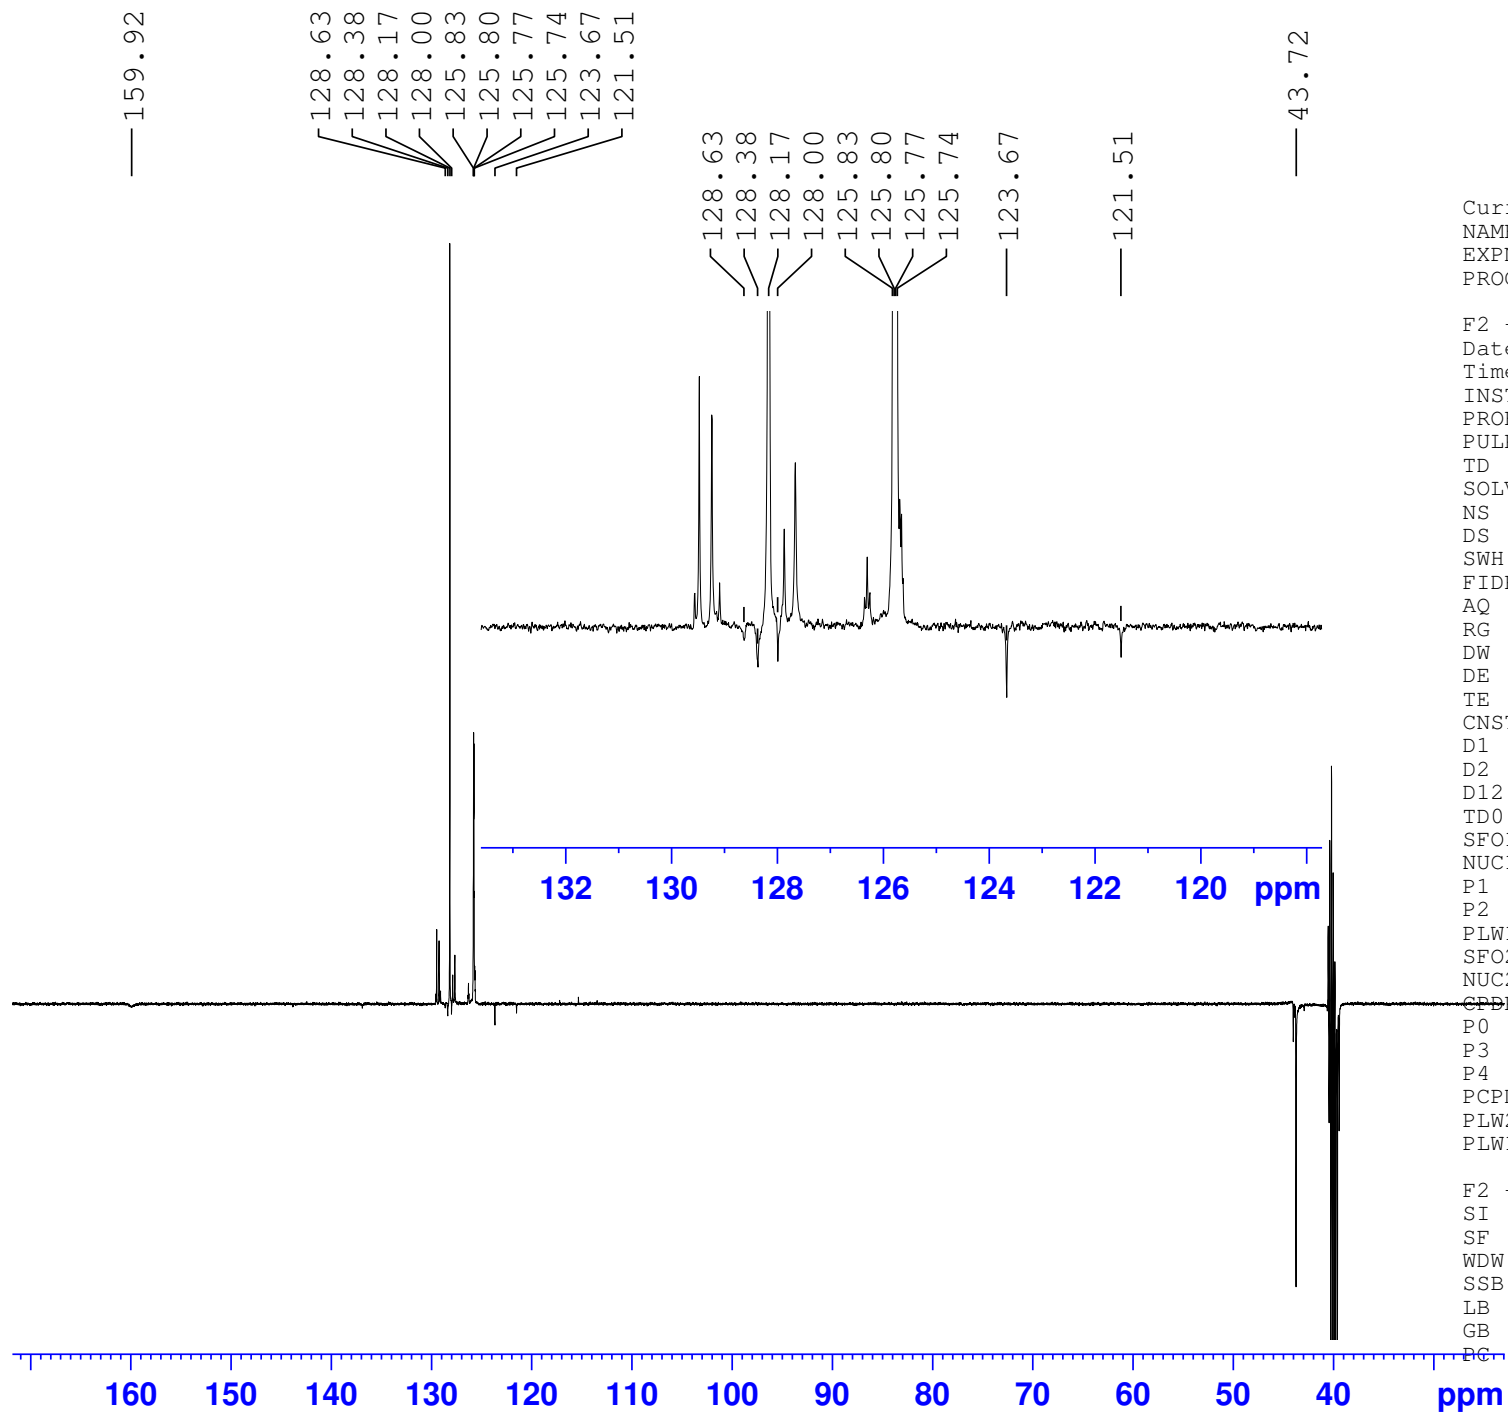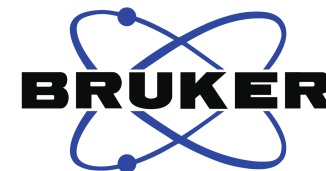

Current Data Parameters  
 NAME 9  
 EXPNO 3  
 PROCNO 1

F2 - Acquisition Parameters  
 Date\_ 20180817  
 Time 9.09 h  
 INSTRUM spect  
 PROBHD Z119470\_0187 (  
 PULPROG deptq135  
 TD 65536  
 SOLVENT DMSO  
 NS 14945  
 DS 8  
 SWH 29761.904 Hz  
 FIDRES 0.908261 Hz  
 AQ 1.1010048 sec  
 RG 192.72  
 DW 16.800 usec  
 DE 6.50 usec  
 TE 297.1 K  
 CNST2 145.000000  
 D1 2.00000000 sec  
 D2 0.00344828 sec  
 D12 0.00002000 sec  
 TD0 1  
 SFO1 125.7829381 MHz  
 NUC1 13C  
 P1 10.00 usec  
 P2 20.00 usec  
 PLW1 82.09700012 W  
 SFO2 500.1820007 MHz  
 NUC2 1H  
 CPDPRG[2] waltz16  
 P0 15.00 usec  
 P3 10.00 usec  
 P4 20.00 usec  
 PCPD2 80.00 usec  
 PLW2 18.10400009 W  
 PLW12 0.28288001 W

F2 - Processing parameters  
 SI 32768  
 SF 125.7703610 MHz  
 WDW EM  
 SSB 0  
 LB 1.00 Hz  
 GB 0  
 PC 1.40

<sup>13</sup>C (DEPTQ135) NMR (125 MHz, DMSO-d<sub>6</sub>) of 9

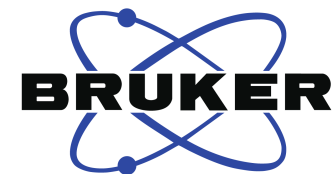

Current Data Parameters  
NAME 9  
EXPNO 6  
PROCNO 1

F2 - Acquisition Parameters  
Date\_ 20190801  
Time 14.44 h  
INSTRUM spect  
PROBHD Z119470\_0187 (  
PULPROG zgfhigqn.2  
TD 131072  
SOLVENT DMSO  
NS 16  
DS 4  
SWH 113636.367 Hz  
FIDRES 1.733953 Hz  
AQ 0.5767168 sec  
RG 11.27  
DW 4.400 usec  
DE 6.50 usec  
TE 293.4 K  
D1 1.00000000 sec  
D11 0.03000000 sec  
D12 0.00002000 sec  
TD0 1  
SFO1 470.5923603 MHz  
NUC1 19F  
P1 16.00 usec  
PLW1 36.93899918 W  
SFO2 500.1820007 MHz  
NUC2 1H  
CPDPRG[2] waltz16  
PCPD2 80.00 usec  
PLW2 18.10400009 W  
PLW12 0.31009001 W

F2 - Processing parameters  
SI 65536  
SF 470.6394242 MHz  
WDW EM  
SSB 0  
LB 0.30 Hz  
GB 0  
CB 1.00

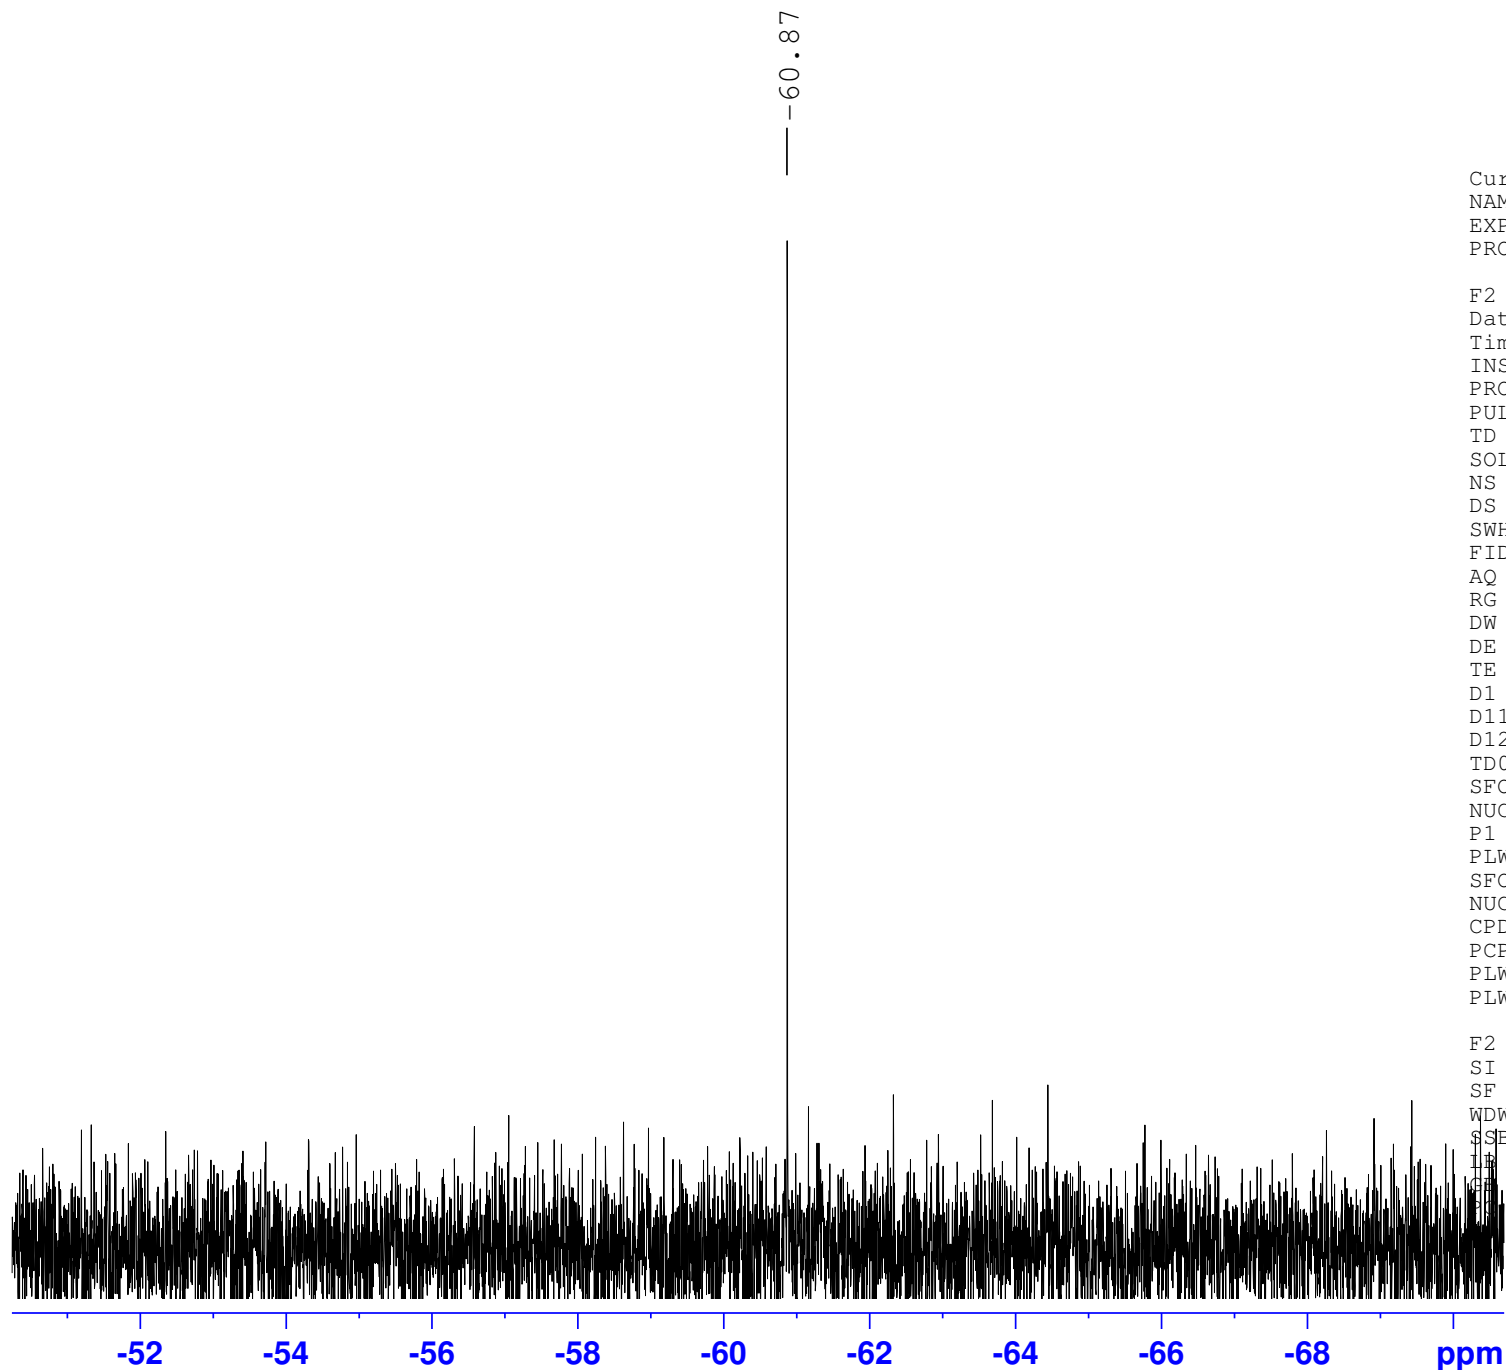

<sup>19</sup>F NMR (470 MHz, DMSO-d<sub>6</sub>) of 9

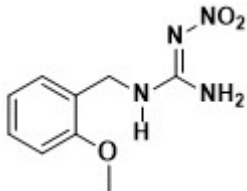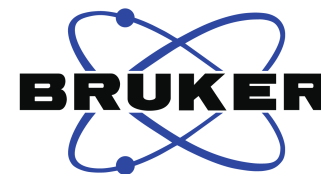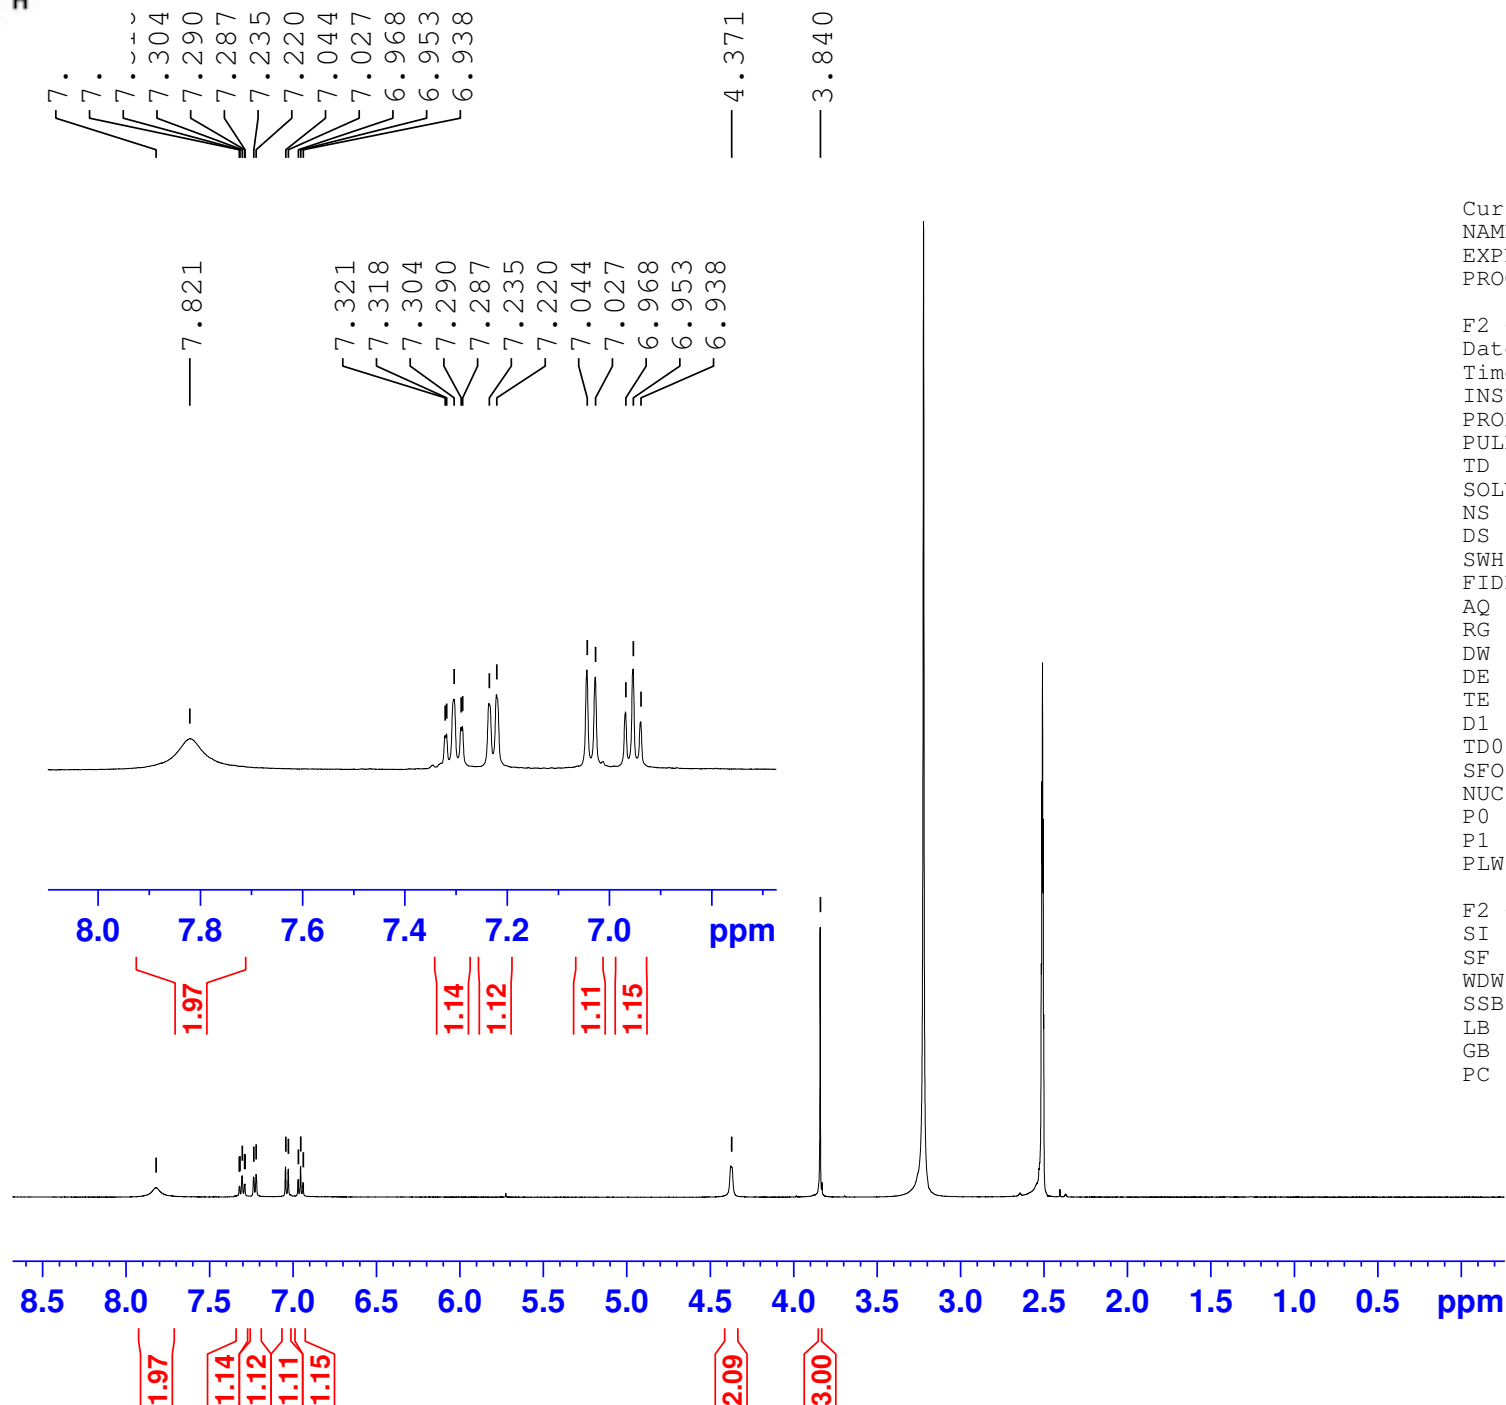

Current Data Parameters  
NAME 10  
EXPNO 1  
PROCNO 1

F2 - Acquisition Parameters  
Date\_ 20180817  
Time 11.06 h  
INSTRUM spect  
PROBHD Z119470\_0187 (  
PULPROG zg30  
TD 65536  
SOLVENT DMSO  
NS 5  
DS 1  
SWH 10000.000 Hz  
FIDRES 0.305176 Hz  
AQ 3.2767999 sec  
RG 139.09  
DW 50.000 usec  
DE 6.50 usec  
TE 323.1 K  
D1 1.00000000 sec  
TD0 1  
SFO1 500.1830886 MHz  
NUC1 1H  
P0 3.33 usec  
P1 10.00 usec  
PLW1 18.10400009 W

F2 - Processing parameters  
SI 65536  
SF 500.1800000 MHz  
WDW EM  
SSB 0  
LB 0.30 Hz  
GB 0  
PC 1.00

<sup>1</sup>H NMR (500 MHz, DMSO-d<sub>6</sub>, 50°C) of **10**

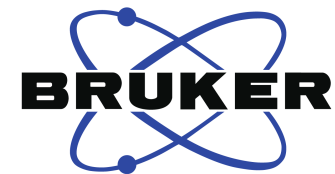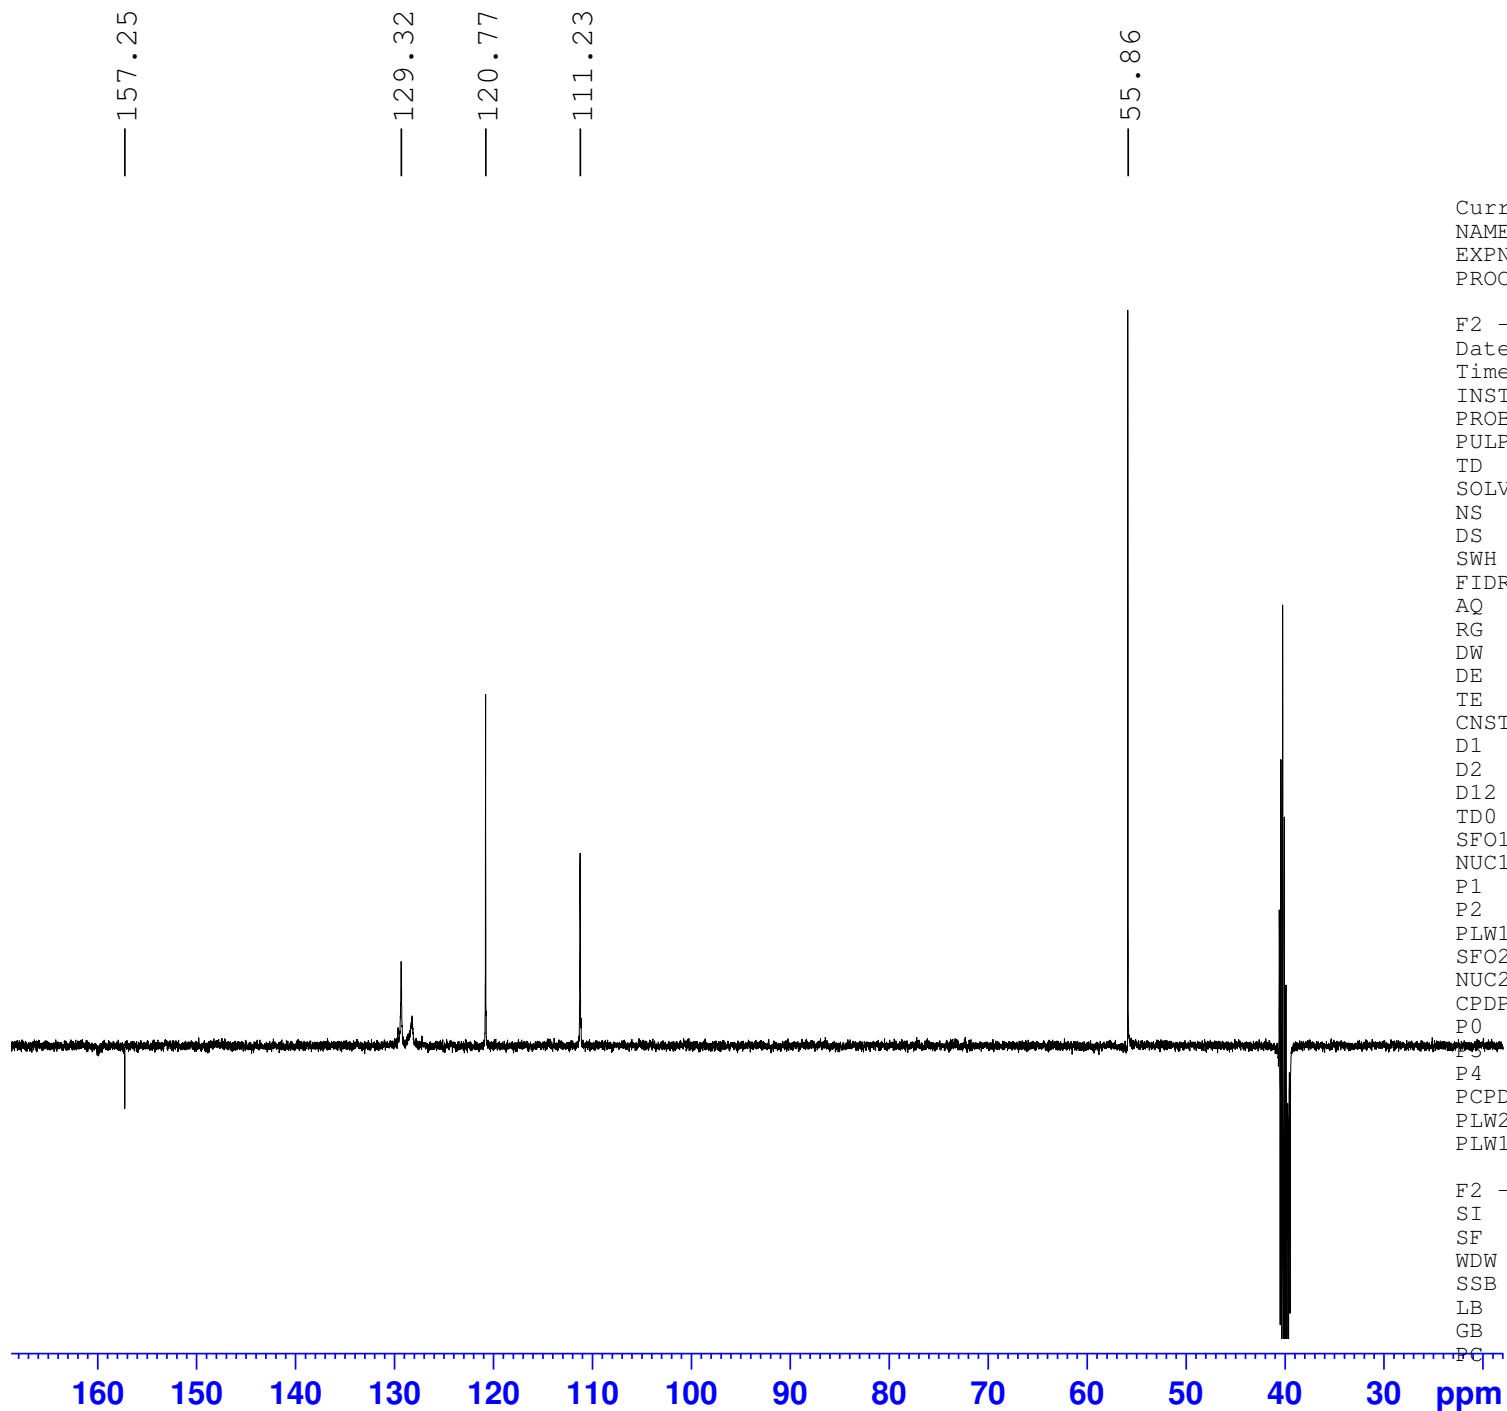

Current Data Parameters  
NAME 10  
EXPNO 2  
PROCNO 1

F2 - Acquisition Parameters  
Date\_ 20180817  
Time 15.58 h  
INSTRUM spect  
PROBHD Z119470\_0187 (  
PULPROG deptq135  
TD 65536  
SOLVENT DMSO  
NS 5120  
DS 8  
SWH 29761.904 Hz  
FIDRES 0.908261 Hz  
AQ 1.1010048 sec  
RG 192.72  
DW 16.800 usec  
DE 6.50 usec  
TE 290.9 K  
CNST2 145.0000000  
D1 2.00000000 sec  
D2 0.00344828 sec  
D12 0.00002000 sec  
TD0 1  
SFO1 125.7829381 MHz  
NUC1 13C  
P1 10.00 usec  
P2 20.00 usec  
PLW1 82.09700012 W  
SFO2 500.1820007 MHz  
NUC2 1H  
CPDPRG[2] waltz16  
P0 15.00 usec  
P3 10.00 usec  
P4 20.00 usec  
PCPD2 80.00 usec  
PLW2 18.10400009 W  
PLW12 0.28288001 W

F2 - Processing parameters  
SI 32768  
SF 125.7703610 MHz  
WDW EM  
SSB 0  
LB 1.00 Hz  
GB 0  
PC 1.40



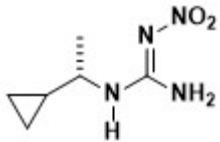

6.66  
3.10  
3.09  
3.082  
1.386  
1.373  
1.050  
1.045  
1.041  
1.035  
1.029  
1.025  
1.019  
1.013  
1.008  
1.003  
0.993  
0.698  
0.690  
0.681  
0.671  
0.668  
0.664  
0.654  
0.640  
0.394  
0.384  
0.374  
0.366  
0.357  
0.351  
0.342  
0.334  
0.325  
0.319  
0.317  
0.315  
0.310

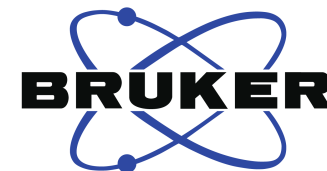

1.035  
1.029  
1.025  
1.019  
0.681  
0.671  
0.668  
0.664  
0.654  
0.640  
0.394  
0.384  
0.374  
0.366  
0.357  
0.351  
0.342  
0.334  
0.325  
0.315

Current Data Parameters  
NAME S-11  
EXPNO 4  
PROCNO 1

F2 - Acquisition Parameters  
Date\_ 20180601  
Time 10.34 h  
INSTRUM spect  
PROBHD Z119470\_0187 (  
PULPROG zgcppr  
TD 32768  
SOLVENT CDC13  
NS 16  
DS 4  
SWH 8012.820 Hz  
FIDRES 0.489064 Hz  
AQ 2.0447233 sec  
RG 139.09  
DW 62.400 usec  
DE 6.50 usec  
TE 291.0 K  
D1 2.00000000 sec  
D12 0.00002000 sec  
TD0 1  
SFO1 500.1808034 MHz  
NUC1 1H  
P1 10.00 usec  
PLW1 18.10400009 W  
PLW9 0.00007242 W

F2 - Processing parameters  
SI 32768  
SF 500.1800000 MHz  
WDW EM  
SSB 0  
LB 0.30 Hz  
GB 0  
PC 1.00

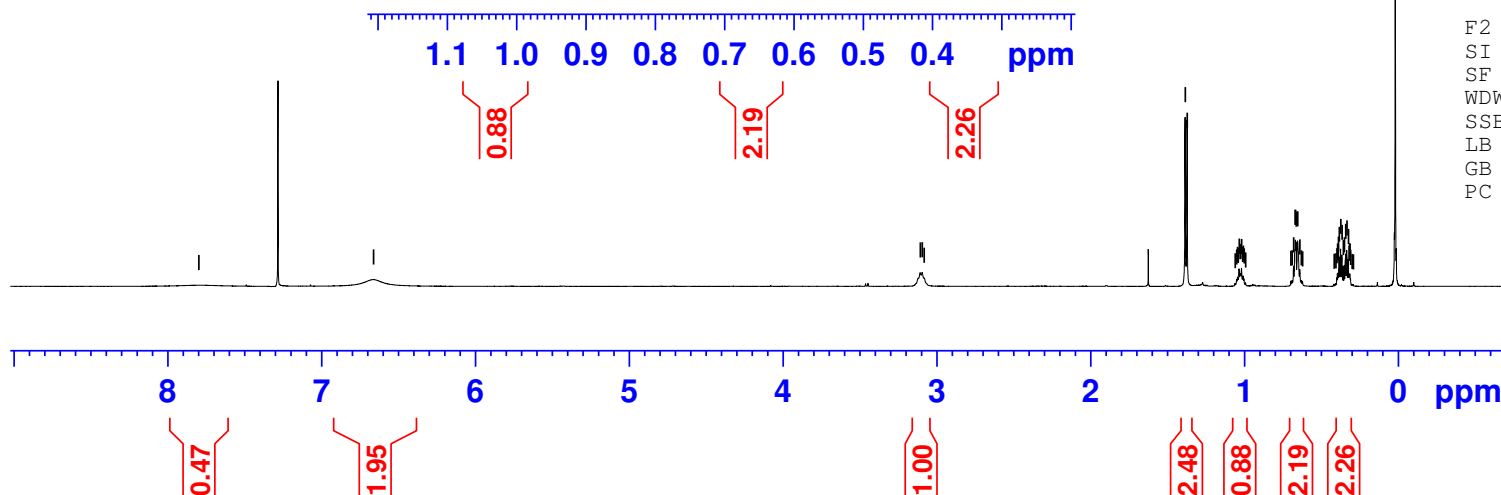

<sup>1</sup>H NMR (500 MHz, CDCl<sub>3</sub>) of S-11

—158.62

—52.33

—20.21  
—16.90

3.85  
3.15  
0.01

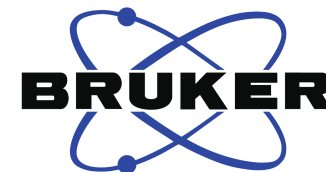

Current Data Parameters  
NAME S-11  
EXPNO 3  
PROCNO 1

F2 - Acquisition Parameters  
Date\_ 20180601  
Time 13.59 h  
INSTRUM spect  
PROBHD Z119470\_0187 (  
PULPROG deptq135  
TD 65536  
SOLVENT CDC13  
NS 3832  
DS 8  
SWH 29761.904 Hz  
FIDRES 0.908261 Hz  
AQ 1.1010048 sec  
RG 192.72  
DW 16.800 usec  
DE 6.50 usec  
TE 291.7 K  
CNST2 145.0000000  
D1 2.00000000 sec  
D2 0.00344828 sec  
D12 0.00002000 sec  
TD0 1  
SFO1 125.7829381 MHz  
NUC1 13C  
P1 10.00 usec  
P2 20.00 usec  
PLW1 82.09700012 W  
SFO2 500.1820007 MHz  
NUC2 1H  
CPDPRG[2] waltz16  
P0 15.00 usec  
P3 10.00 usec  
P4 20.00 usec  
PCPD2 80.00 usec  
PLW2 18.10400009 W  
PLW12 0.28288001 W

F2 - Processing parameters  
SI 32768  
SF 125.7703610 MHz  
WDW EM  
SSB 0  
LB 1.00 Hz  
GB 0  
PC 1.40

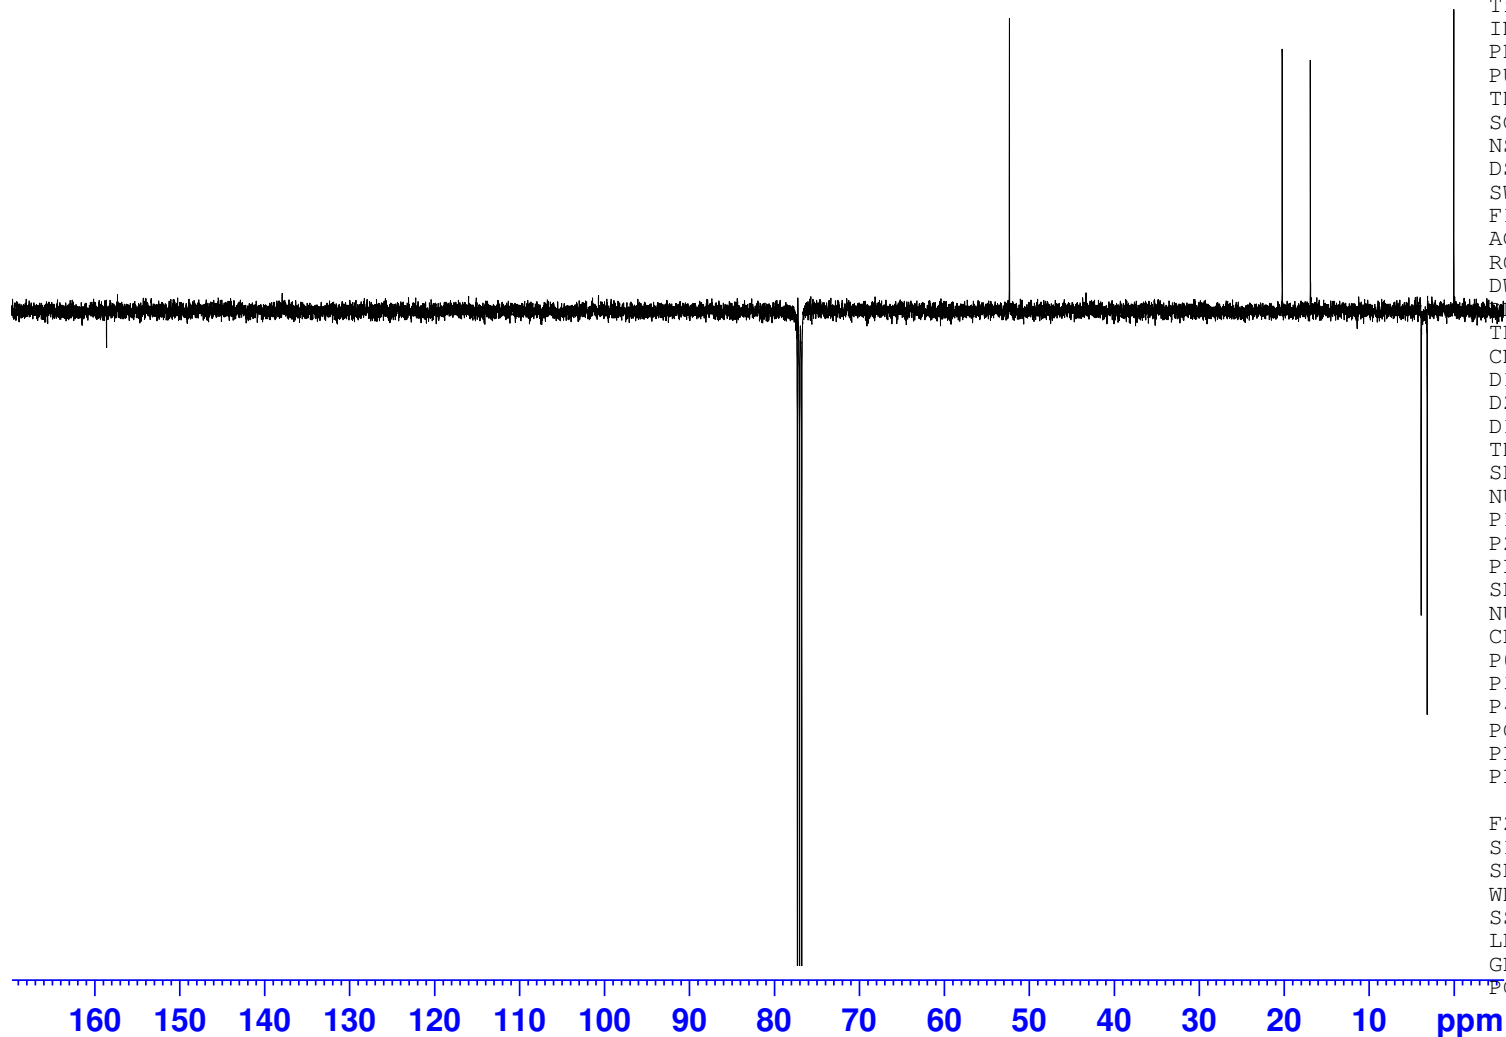

<sup>13</sup>C (DEPTQ135) NMR (125 MHz, CDCl<sub>3</sub>) of S-11

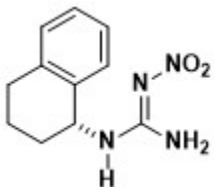

7.267  
7.255  
7.252  
7.186  
7.135  
7.122

— 4.998

2.890  
2.879  
2.866  
2.857  
2.844  
2.804  
2.792  
2.780  
2.759  
2.111  
2.093  
2.085  
2.074  
1.926  
1.909  
1.890  
1.877



Current Data Parameters  
NAME S-12  
EXPNO 3  
PROCNO 1

F2 - Acquisition Parameters  
Date\_ 20200410  
Time 13.04 h  
INSTRUM spect  
PROBHD z119470\_0187 (  
PULPROG zg30  
TD 65536  
SOLVENT MeOD  
NS 16  
DS 2  
SWH 10000.000 Hz  
FIDRES 0.305176 Hz  
AQ 3.276799 sec  
RG 95.16  
DW 50.000 usec  
DE 6.50 usec  
TE 323.2 K  
D1 1.00000000 sec  
TD0 1  
SFO1 500.1830886 MHz  
NUC1 1H  
P0 3.49 usec  
P1 10.47 usec  
PLW1 18.10400009 W

F2 - Processing parameters  
SI 65536  
SF 500.1800000 MHz  
WDW EM  
SSB 0  
LB 0.30 Hz  
GB 0  
PC 1.00

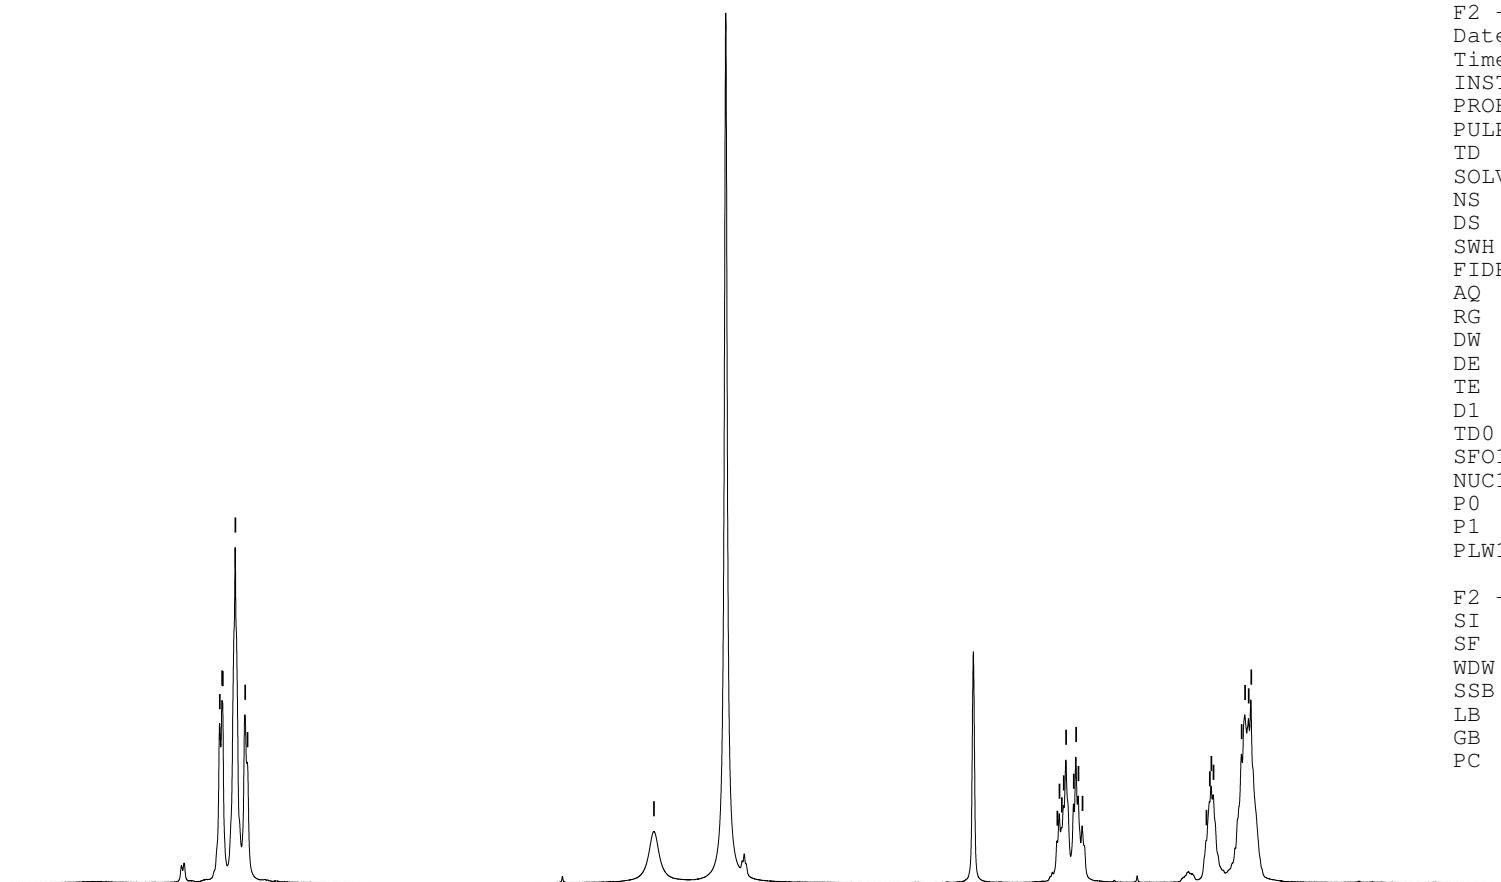

8.0 7.5 7.0 6.5 6.0 5.5 5.0 4.5 4.0 3.5 3.0 2.5 2.0 1.5 ppm

4.68

1.00

2.11

1.22  
3.24

<sup>1</sup>H NMR (500 MHz, CD<sub>3</sub>OD, 50°C) of **S-12**

—159.05

—137.35  
128.89  
128.01  
127.30  
125.93

—49.51

—29.62  
—28.58

—19.48

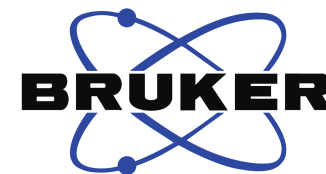

Current Data Parameters  
NAME S-12  
EXPNO 4  
PROCNO 1

F2 - Acquisition Parameters  
Date\_ 20200410  
Time 13.16 h  
INSTRUM spect  
PROBHD Z119470\_0187 (  
PULPROG deptq135  
TD 65536  
SOLVENT MeOD  
NS 203  
DS 8  
SWH 29761.904 Hz  
FIDRES 0.908261 Hz  
AQ 1.1010048 sec  
RG 192.72  
DW 16.800 usec  
DE 6.50 usec  
TE 323.1 K  
CNST2 145.0000000  
D1 2.00000000 sec  
D2 0.00344828 sec  
D12 0.00002000 sec  
TD0 1  
SFO1 125.7829381 MHz  
NUC1 13C  
P1 10.00 usec  
P2 20.00 usec  
PLW1 82.09700012 W  
SFO2 500.1820007 MHz  
NUC2 1H  
CPDPRG[2] waltz16  
P0 15.70 usec  
P3 10.47 usec  
P4 20.94 usec  
PCPD2 80.00 usec  
PLW2 18.10400009 W  
PLW12 0.31009001 W

F2 - Processing parameters  
SI 32768  
SF 125.7703610 MHz  
WDW EM  
SSB 0  
LB 1.00 Hz  
GB 0  
PC 1.40

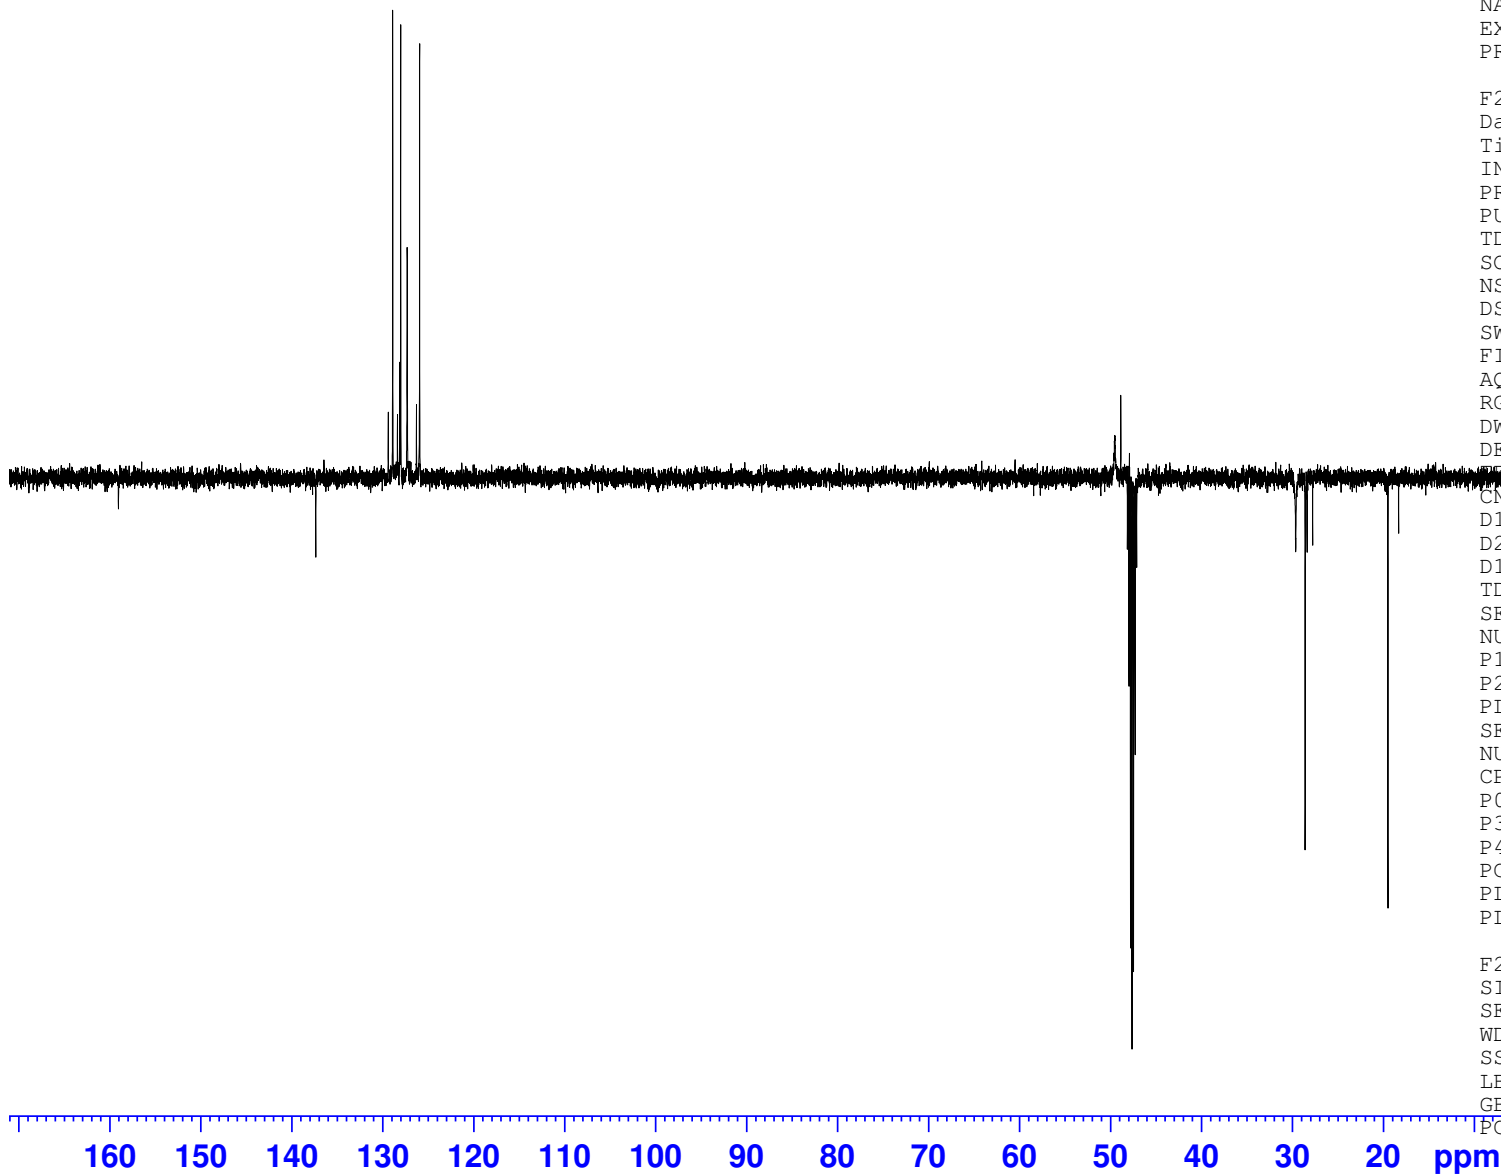

<sup>13</sup>C (DEPTQ135) NMR (125 MHz, CD<sub>3</sub>OD, 50°C) of **S-12**

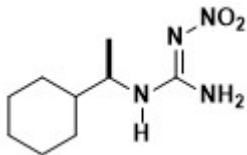

— 8.471

— 6.647

3.346  
1.841  
1.821  
1.799  
1.755  
1.730  
1.703  
1.673  
1.499  
1.494  
1.311  
1.283  
1.270  
1.237  
1.233  
1.227  
1.200  
1.194  
1.175  
1.169  
1.150  
1.143

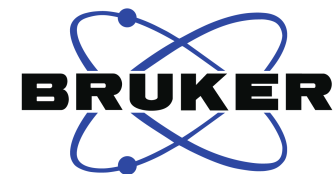

Current Data Parameters  
NAME R-13  
EXPNO 1  
PROCNO 1

F2 - Acquisition Parameters  
Date\_ 20170810  
Time 10.48 h  
INSTRUM spect  
PROBHD zg30  
PULPROG zg30  
TD 65536  
SOLVENT CDCl3  
NS 16  
DS 2  
SWH 10000.000 Hz  
FIDRES 0.305176 Hz  
AQ 3.2767999 sec  
RG 139.09  
DW 50.000 usec  
DE 6.50 usec  
TE 292.0 K  
D1 1.00000000 sec  
TD0 1  
SFO1 500.1830886 MHz  
NUC1 1H  
P1 10.00 usec  
PLW1 18.10400009 W

F2 - Processing parameters  
SI 65536  
SF 500.1800094 MHz  
WDW EM  
SSB 0  
LB 0.30 Hz  
GB 0  
PC 1.00

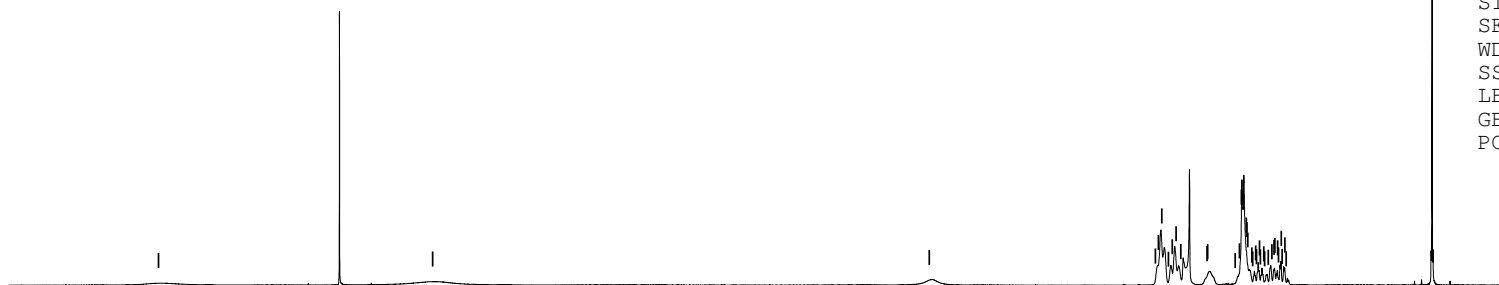

9.0 8.5 8.0 7.5 7.0 6.5 6.0 5.5 5.0 4.5 4.0 3.5 3.0 2.5 2.0 1.5 1.0 0.5 ppm

0.80

1.83

1.00

6.27

1.15

9.52

<sup>1</sup>H NMR (500 MHz, CDCl<sub>3</sub>) of **R-13**

—158.63

—42.97

—28.99

—26.12

—25.95

—17.68

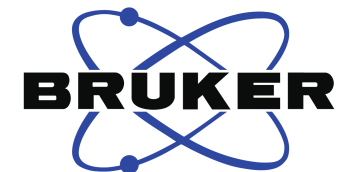

Current Data Parameters  
NAME R-13  
EXPNO 2  
PROCNO 1

F2 - Acquisition Parameters  
Date\_ 20170813  
Time 1.58 h  
INSTRUM spect  
PROBHD Z119470\_0187 (   
PULPROG deptq135  
TD 65536  
SOLVENT CDCl3  
NS 10240  
DS 8  
SWH 29761.904 Hz  
FIDRES 0.908261 Hz  
AQ 1.1010048 sec  
RG 192.72  
DW 16.800 usec  
DE 6.50 usec  
TE 291.3 K  
CNST2 145.0000000  
D1 2.00000000 sec  
D2 0.00344828 sec  
D12 0.00002000 sec  
TD0 1  
SFO1 125.7829381 MHz  
NUC1 13C  
P1 10.00 usec  
P2 20.00 usec  
PLW1 82.09700012 W  
SFO2 500.1820007 MHz  
NUC2 1H  
CPDPRG[2] waltz16  
P0 15.00 usec  
P3 10.00 usec  
P4 20.00 usec  
PCPD2 80.00 usec  
PLW2 18.10400009 W  
PLW12 0.28680280 W

F2 - Processing parameters  
SI 32768  
SF 125.7703610 MHz  
WDW EM  
SSB 0  
LB 1.00 Hz  
GB 0  
PC 1.40

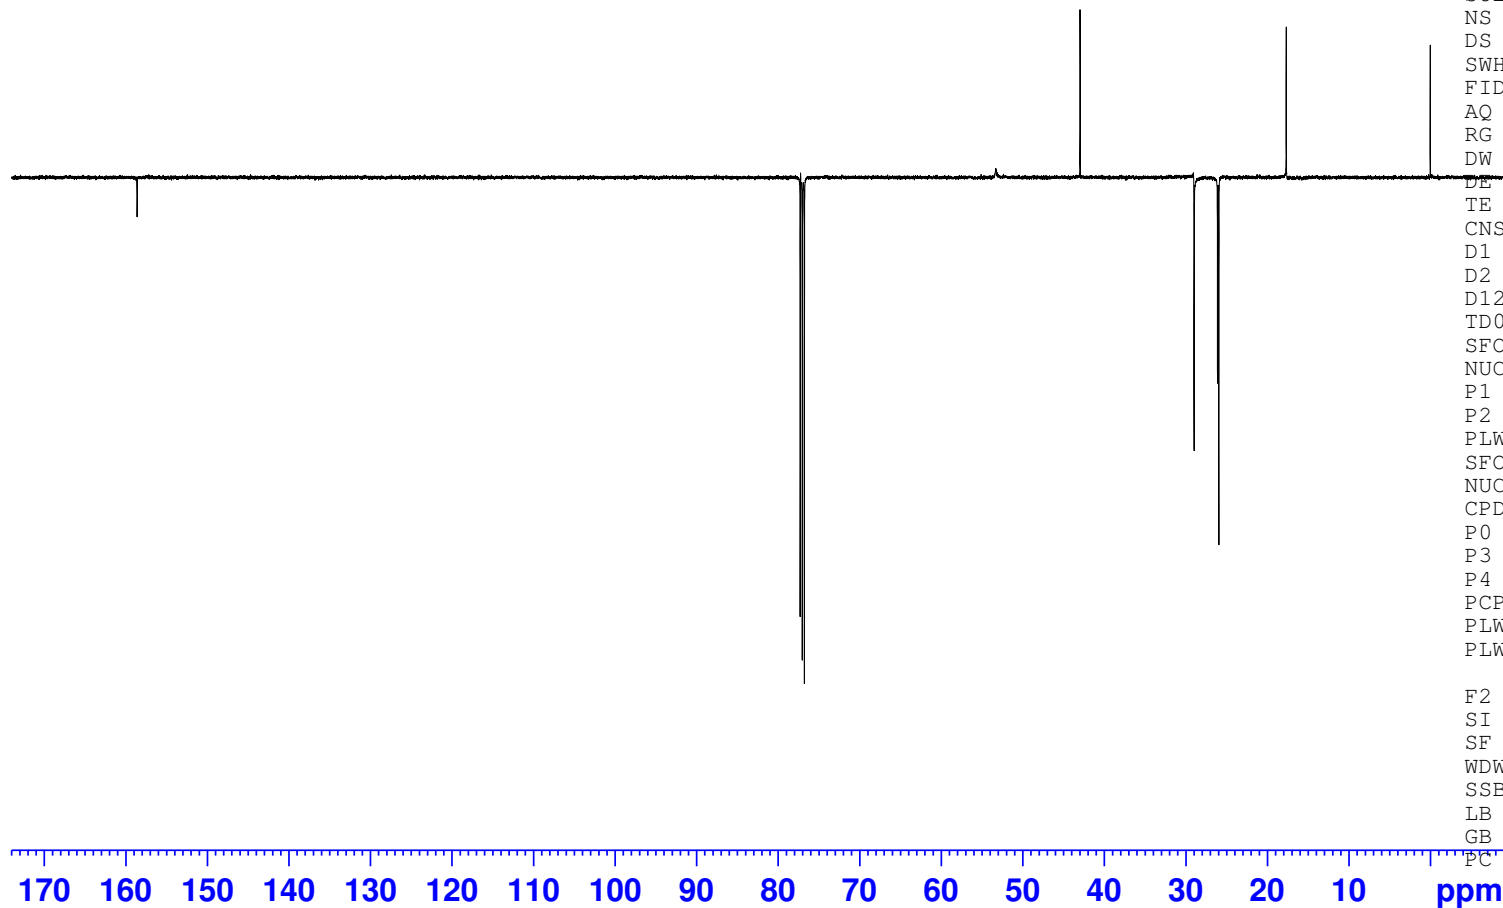

$^{13}\text{C}$  (DEPTQ135) NMR (125 MHz,  $\text{CDCl}_3$ ) of **R-13**

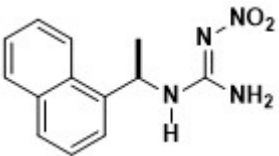

7.61  
7.61  
7.61  
7.61  
7.642  
7.631  
7.628  
7.614  
7.611  
7.608  
7.601  
7.594  
7.592  
7.581  
7.579  
7.553  
7.537  
7.522  
7.284  
5.437

2.065  
1.803  
1.789  
1.621  
1.259

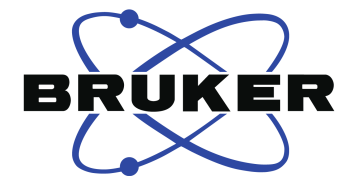

Current Data Parameters  
NAME R-14  
EXPNO 1  
PROCNO 1

F2 - Acquisition Parameters  
Date\_ 20170519  
Time 14.55 h  
INSTRUM spect  
PROBHD Z119470\_0187 (  
PULPROG zg30  
TD 65536  
SOLVENT CDCl3  
NS 16  
DS 2  
SWH 10000.000 Hz  
FIDRES 0.305176 Hz  
AQ 3.2767999 sec  
RG 139.09  
DW 50.000 usec  
DE 6.50 usec  
TE 292.6 K  
D1 1.00000000 sec  
TD0 1  
SFO1 500.1830886 MHz  
NUC1 1H  
P1 10.00 usec  
PLW1 18.10400009 W

F2 - Processing parameters  
SI 65536  
SF 500.1800000 MHz  
WDW EM  
SSB 0  
LB 0.30 Hz  
GB 0  
PC 1.00

8.050  
8.033  
7.978  
7.963  
7.900  
7.884  
7.658  
7.648  
7.645  
7.642  
7.631  
7.628  
7.614  
7.611  
7.608  
7.601  
7.594  
7.592  
7.553  
7.537  
7.522

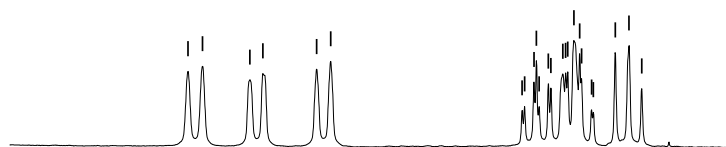

8.2 8.1 8.0 7.9 7.8 7.7 7.6 ppm

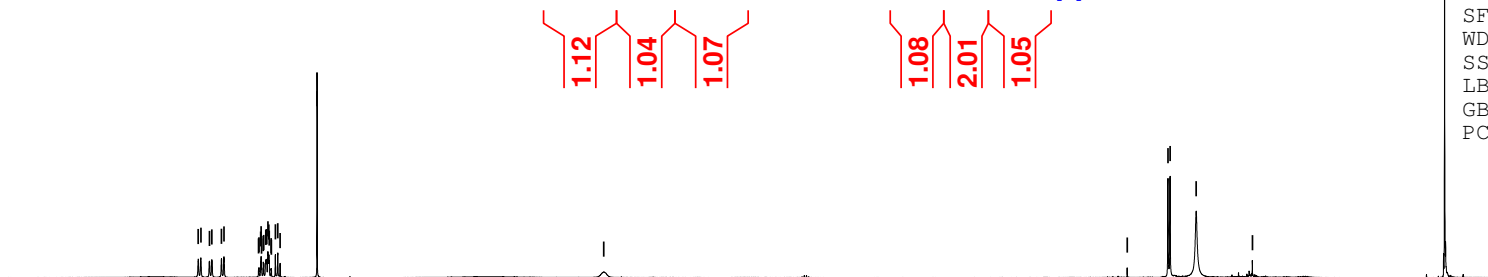

9.0 8.5 8.0 7.5 7.0 6.5 6.0 5.5 5.0 4.5 4.0 3.5 3.0 2.5 2.0 1.5 1.0 0.5 ppm

<sup>1</sup>H NMR (500 MHz, CDCl<sub>3</sub>) of *R*-14

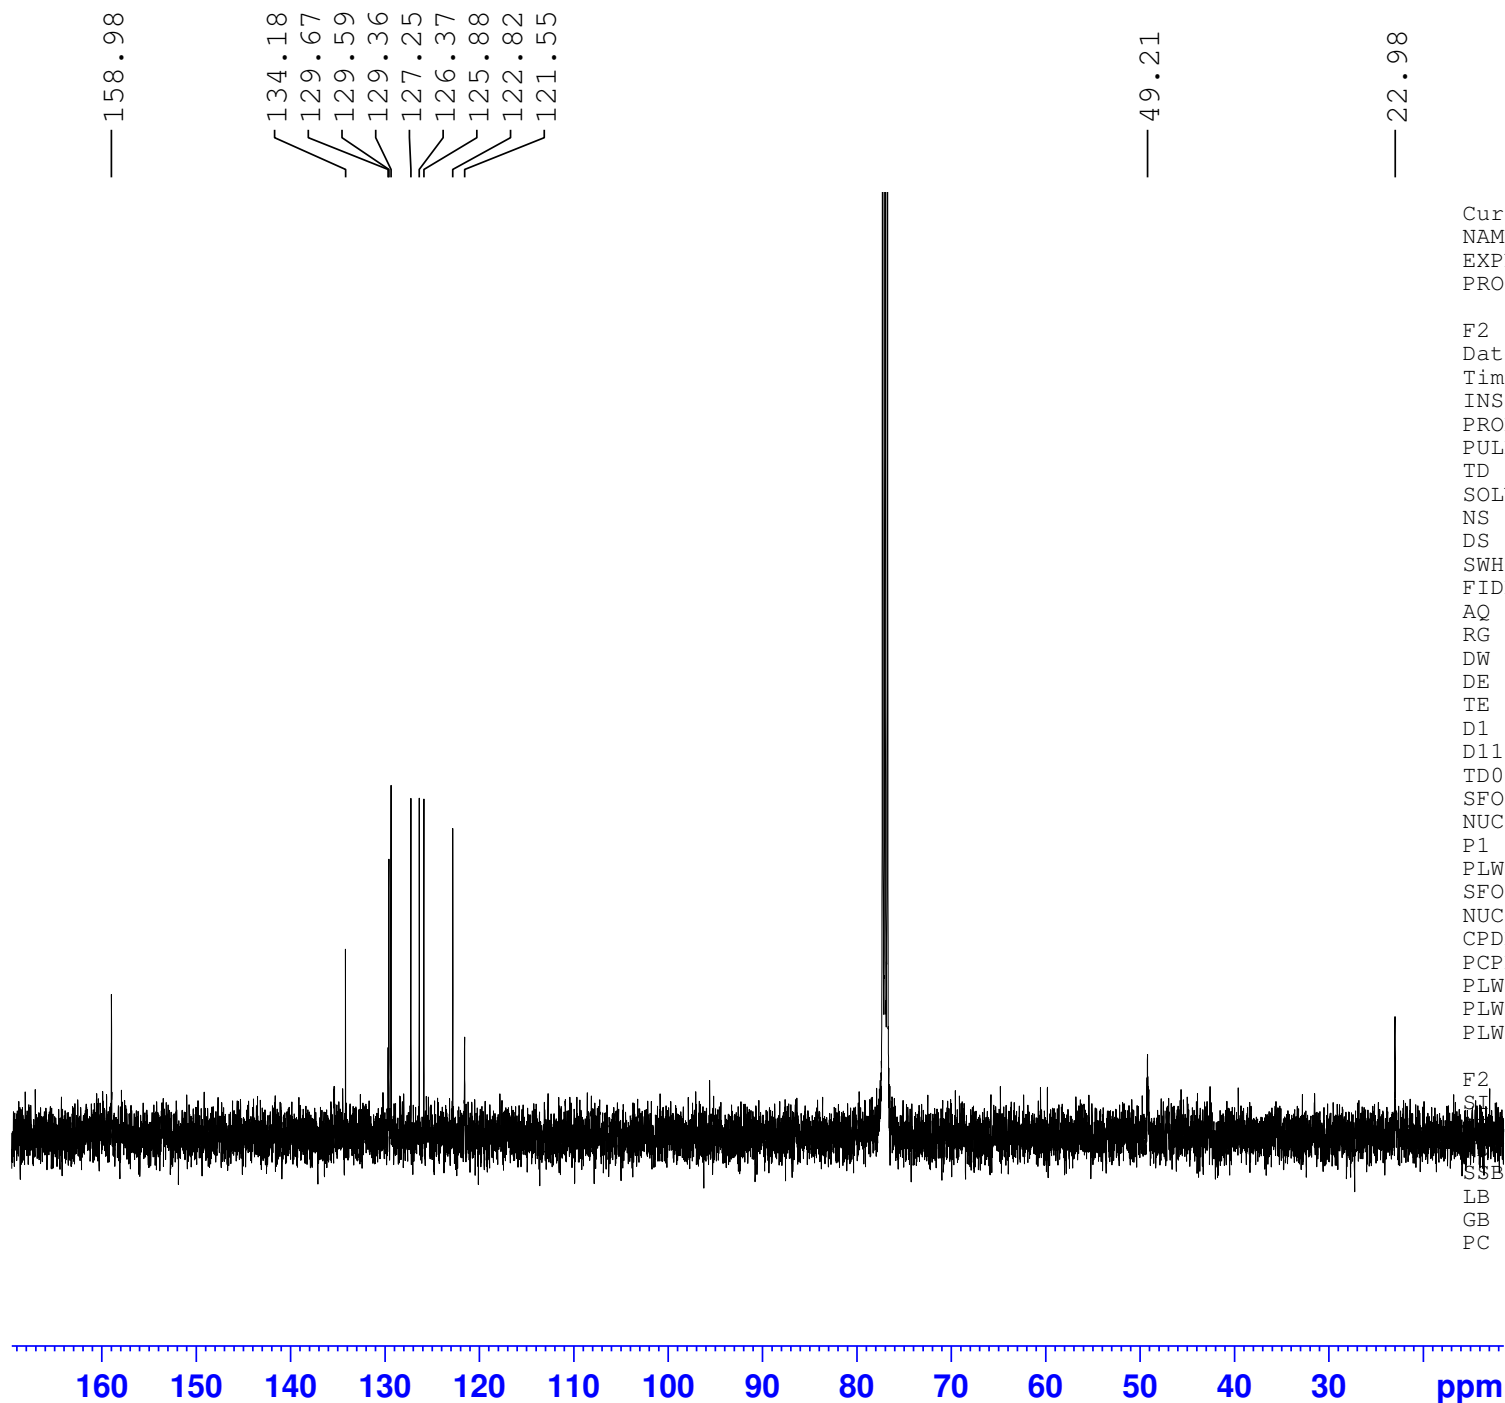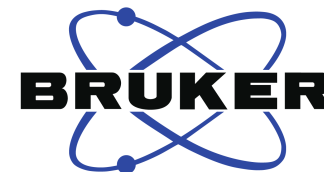

Current Data Parameters  
 NAME 13C  
 EXPNO 1  
 PROCNO 1

F2 - Acquisition Parameters  
 Date\_ 20170519  
 Time 17.39 h  
 INSTRUM spect  
 PROBHD Z119470\_0187 (  
 PULPROG zgpg30  
 TD 65536  
 SOLVENT CDCl3  
 NS 1024  
 DS 4  
 SWH 29761.904 Hz  
 FIDRES 0.908261 Hz  
 AQ 1.1010048 sec  
 RG 192.72  
 DW 16.800 usec  
 DE 6.50 usec  
 TE 293.6 K  
 D1 2.00000000 sec  
 D11 0.03000000 sec  
 TD0 1  
 SFO1 125.7829381 MHz  
 NUC1 13C  
 P1 10.00 usec  
 PLW1 82.09700012 W  
 SFO2 500.1820007 MHz  
 NUC2 1H  
 CPDPRG[2] waltz16  
 PCPD2 80.00 usec  
 PLW2 18.10400009 W  
 PLW12 0.28680280 W  
 PLW13 0.14374560 W

F2 - Processing parameters  
 SI 32768  
 SF 125.7703631 MHz  
 EM  
 SSB 0  
 LB 1.00 Hz  
 GB 0  
 PC 1.40



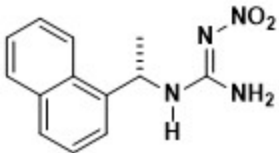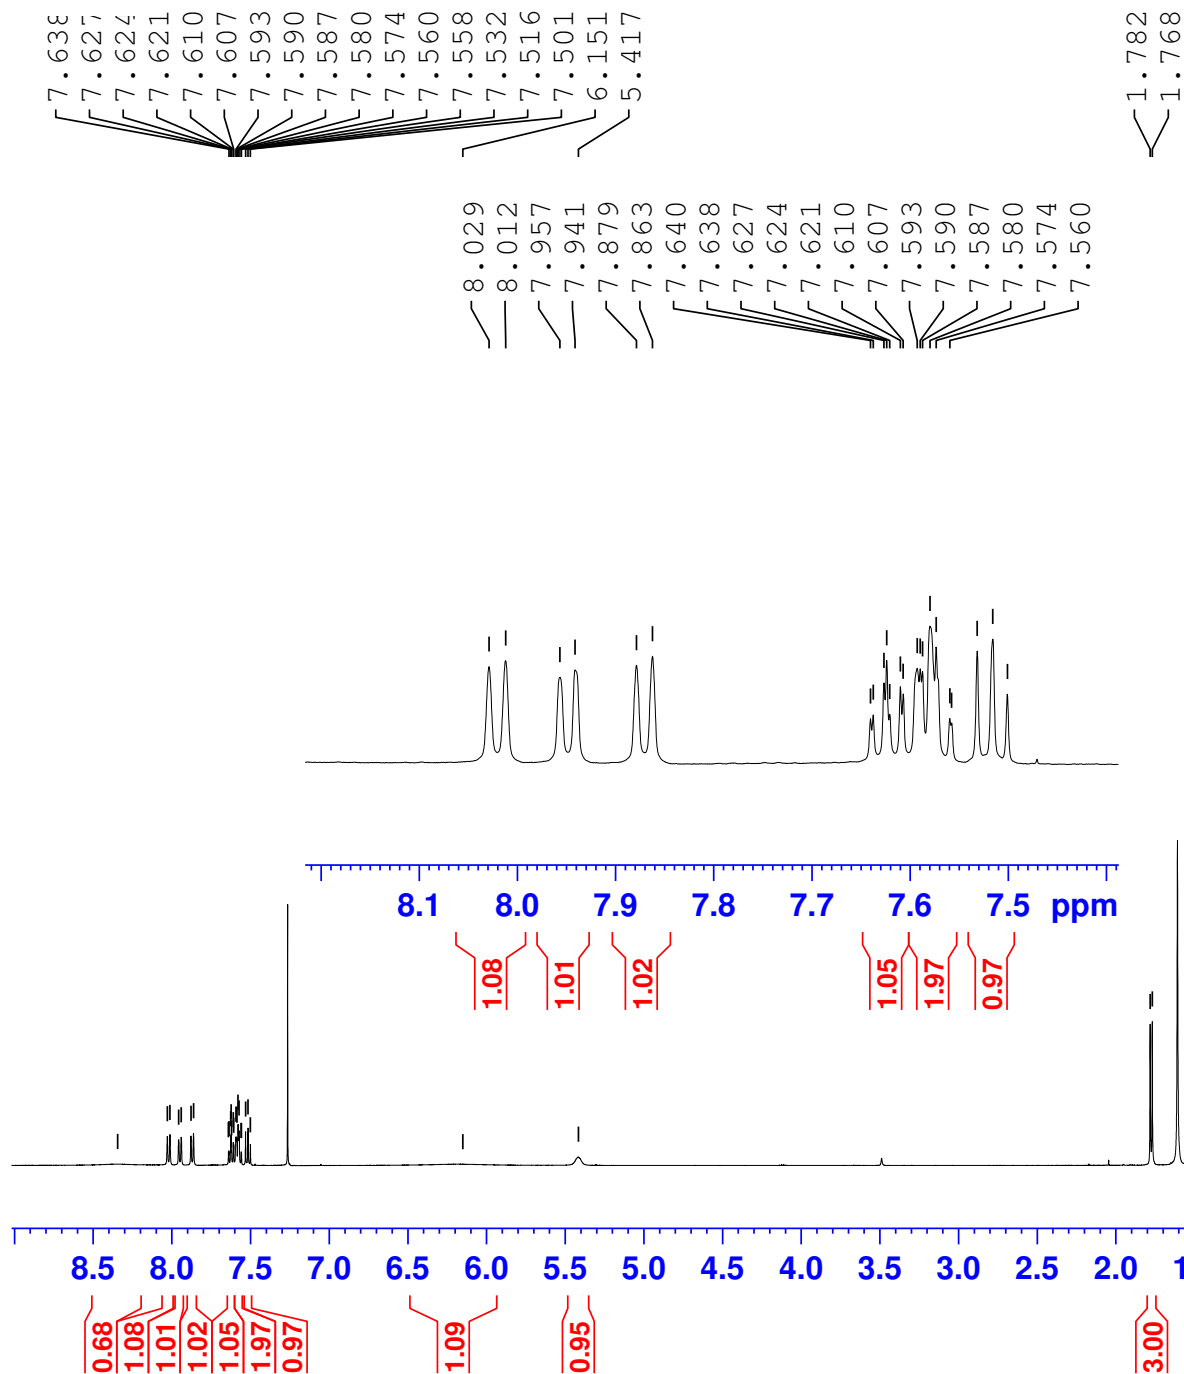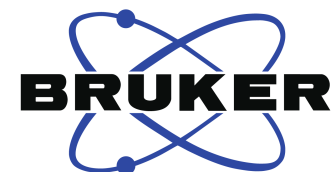

Current Data Parameters  
NAME S-15  
EXPNO 1  
PROCNO 1

F2 - Acquisition Parameters  
Date\_ 20170531  
Time 17.19 h  
INSTRUM spect  
PROBHD Z119470\_0187 (  
PULPROG zg30  
TD 65536  
SOLVENT CDCl3  
NS 16  
DS 2  
SWH 10000.000 Hz  
FIDRES 0.305176 Hz  
AQ 3.2767999 sec  
RG 139.09  
DW 50.000 usec  
DE 6.50 usec  
TE 291.4 K  
D1 1.00000000 sec  
TD0 1  
SFO1 500.1830886 MHz  
NUC1 1H  
P1 10.00 usec  
PLW1 18.10400009 W

F2 - Processing parameters  
SI 65536  
SF 500.1800101 MHz  
WDW EM  
SSB 0  
LB 0.30 Hz  
GB 0  
PC 1.00

<sup>1</sup>H NMR (500 MHz, CDCl<sub>3</sub>) of S-15

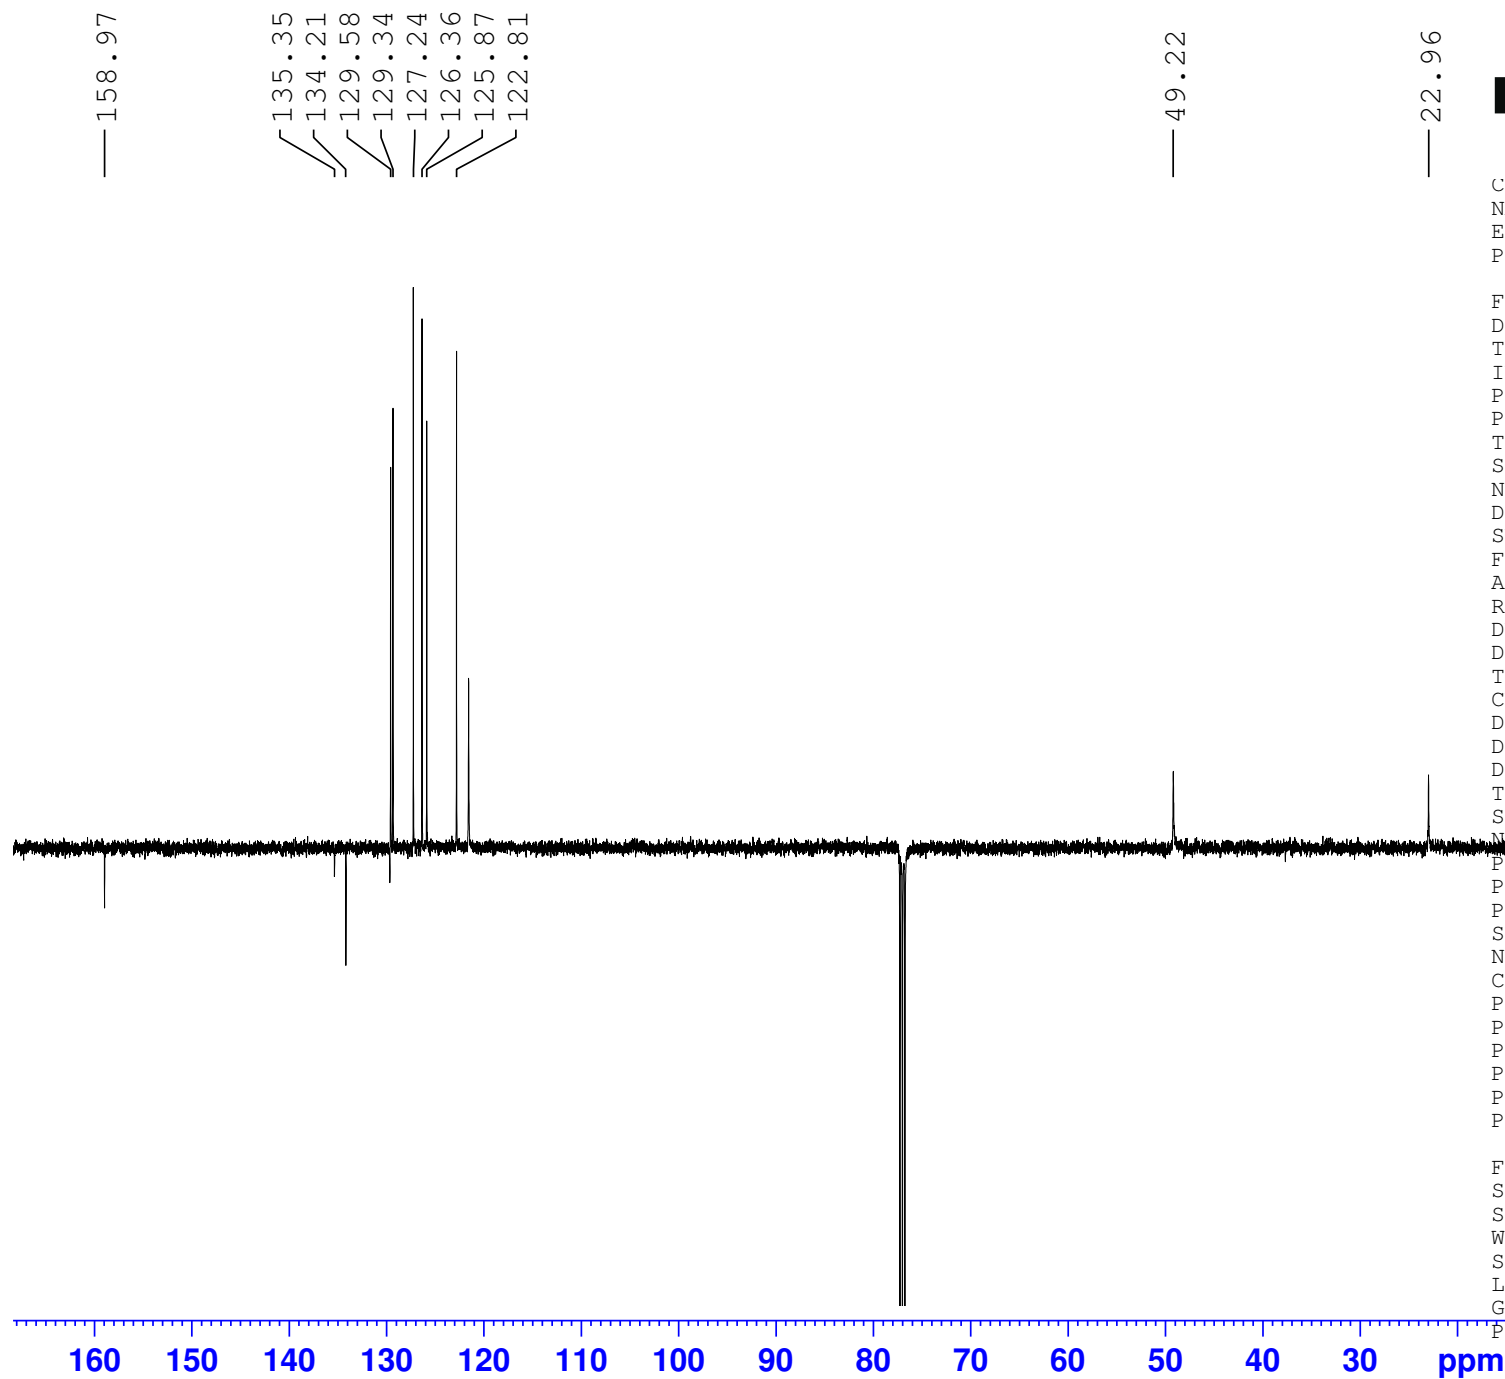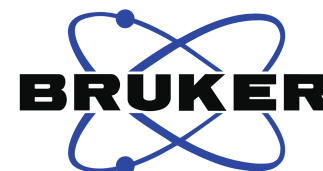

Current Data Parameters  
 NAME S-15  
 EXPNO 2  
 PROCNO 1

F2 - Acquisition Parameters  
 Date\_ 20170601  
 Time 2.18 h  
 INSTRUM spect  
 PROBHD Z119470\_0187 (  
 PULPROG deptq135  
 TD 65536  
 SOLVENT CDCl3  
 NS 10240  
 DS 8  
 SWH 29761.904 Hz  
 FIDRES 0.908261 Hz  
 AQ 1.1010048 sec  
 RG 192.72  
 DW 16.800 usec  
 DE 6.50 usec  
 TE 291.5 K  
 CNST2 145.0000000  
 D1 2.00000000 sec  
 D2 0.00344828 sec  
 D12 0.00002000 sec  
 TD0 1  
 SFO1 125.7829381 MHz  
 NUC1 13C  
 P1 10.00 usec  
 P2 20.00 usec  
 PLW1 82.09700012 W  
 SFO2 500.1820007 MHz  
 NUC2 1H  
 CPDPRG[2] waltz16  
 P0 15.00 usec  
 P3 10.00 usec  
 P4 20.00 usec  
 PCPD2 80.00 usec  
 PLW2 18.10400009 W  
 PLW12 0.28680280 W

F2 - Processing parameters  
 SI 32768  
 SF 125.7703639 MHz  
 WDW EM  
 SSB 0  
 LB 1.00 Hz  
 GB 0  
 FC 1.40

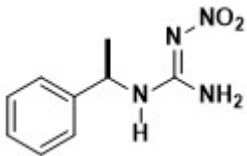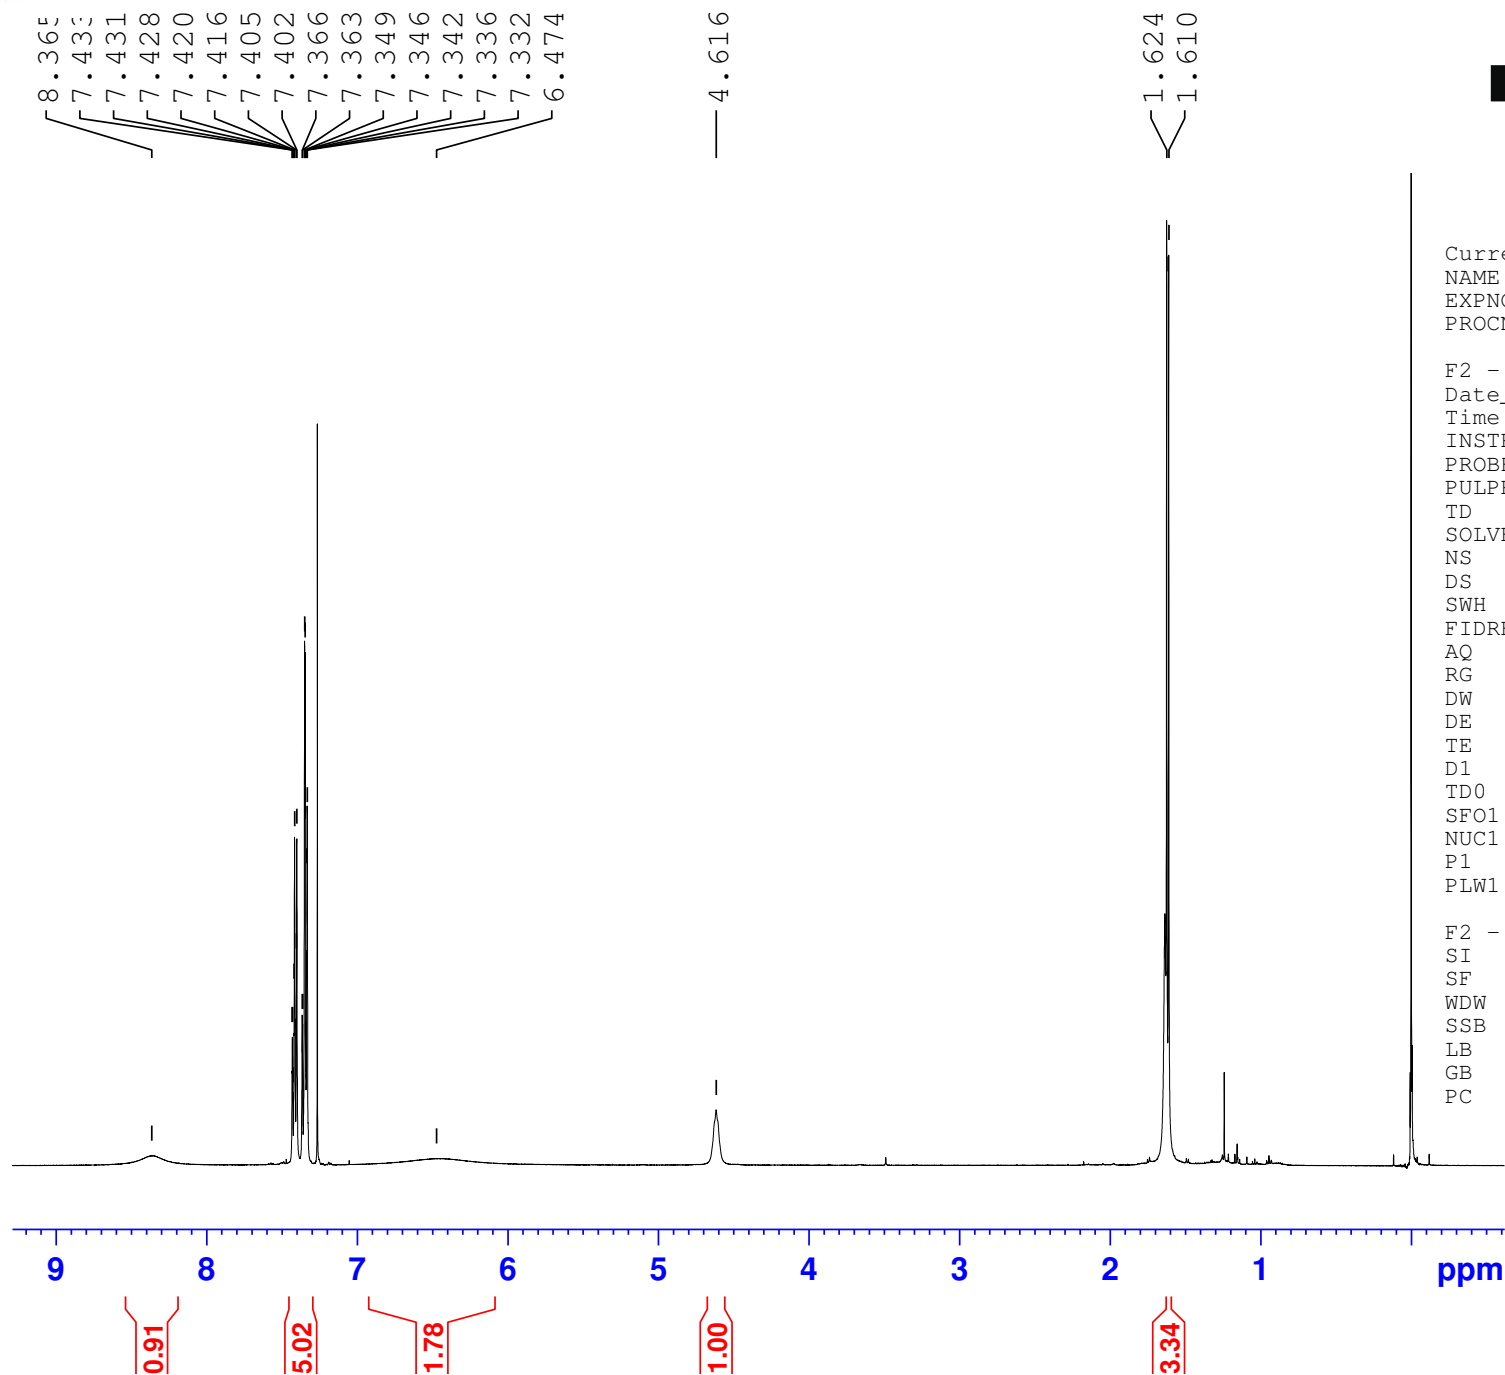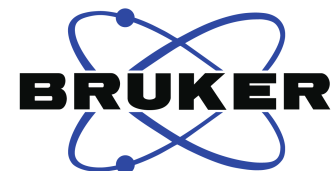

Current Data Parameters  
 NAME 1  
 EXPNO 1  
 PROCNO 1

F2 - Acquisition Parameters  
 Date\_ 20170519  
 Time 14.42 h  
 INSTRUM spect  
 PROBHD Z119470\_0187 (  
 PULPROG zg30  
 TD 65536  
 SOLVENT CDCl3  
 NS 16  
 DS 2  
 SWH 10000.000 Hz  
 FIDRES 0.305176 Hz  
 AQ 3.2767999 sec  
 RG 139.09  
 DW 50.000 usec  
 DE 6.50 usec  
 TE 292.6 K  
 D1 1.00000000 sec  
 TD0 1  
 SFO1 500.1830886 MHz  
 NUC1 1H  
 P1 10.00 usec  
 PLW1 18.10400009 W

F2 - Processing parameters  
 SI 65536  
 SF 500.1800096 MHz  
 WDW EM  
 SSB 0  
 LB 0.30 Hz  
 GB 0  
 PC 1.00

<sup>1</sup>H NMR (500 MHz, CDCl<sub>3</sub>) of **R-16**

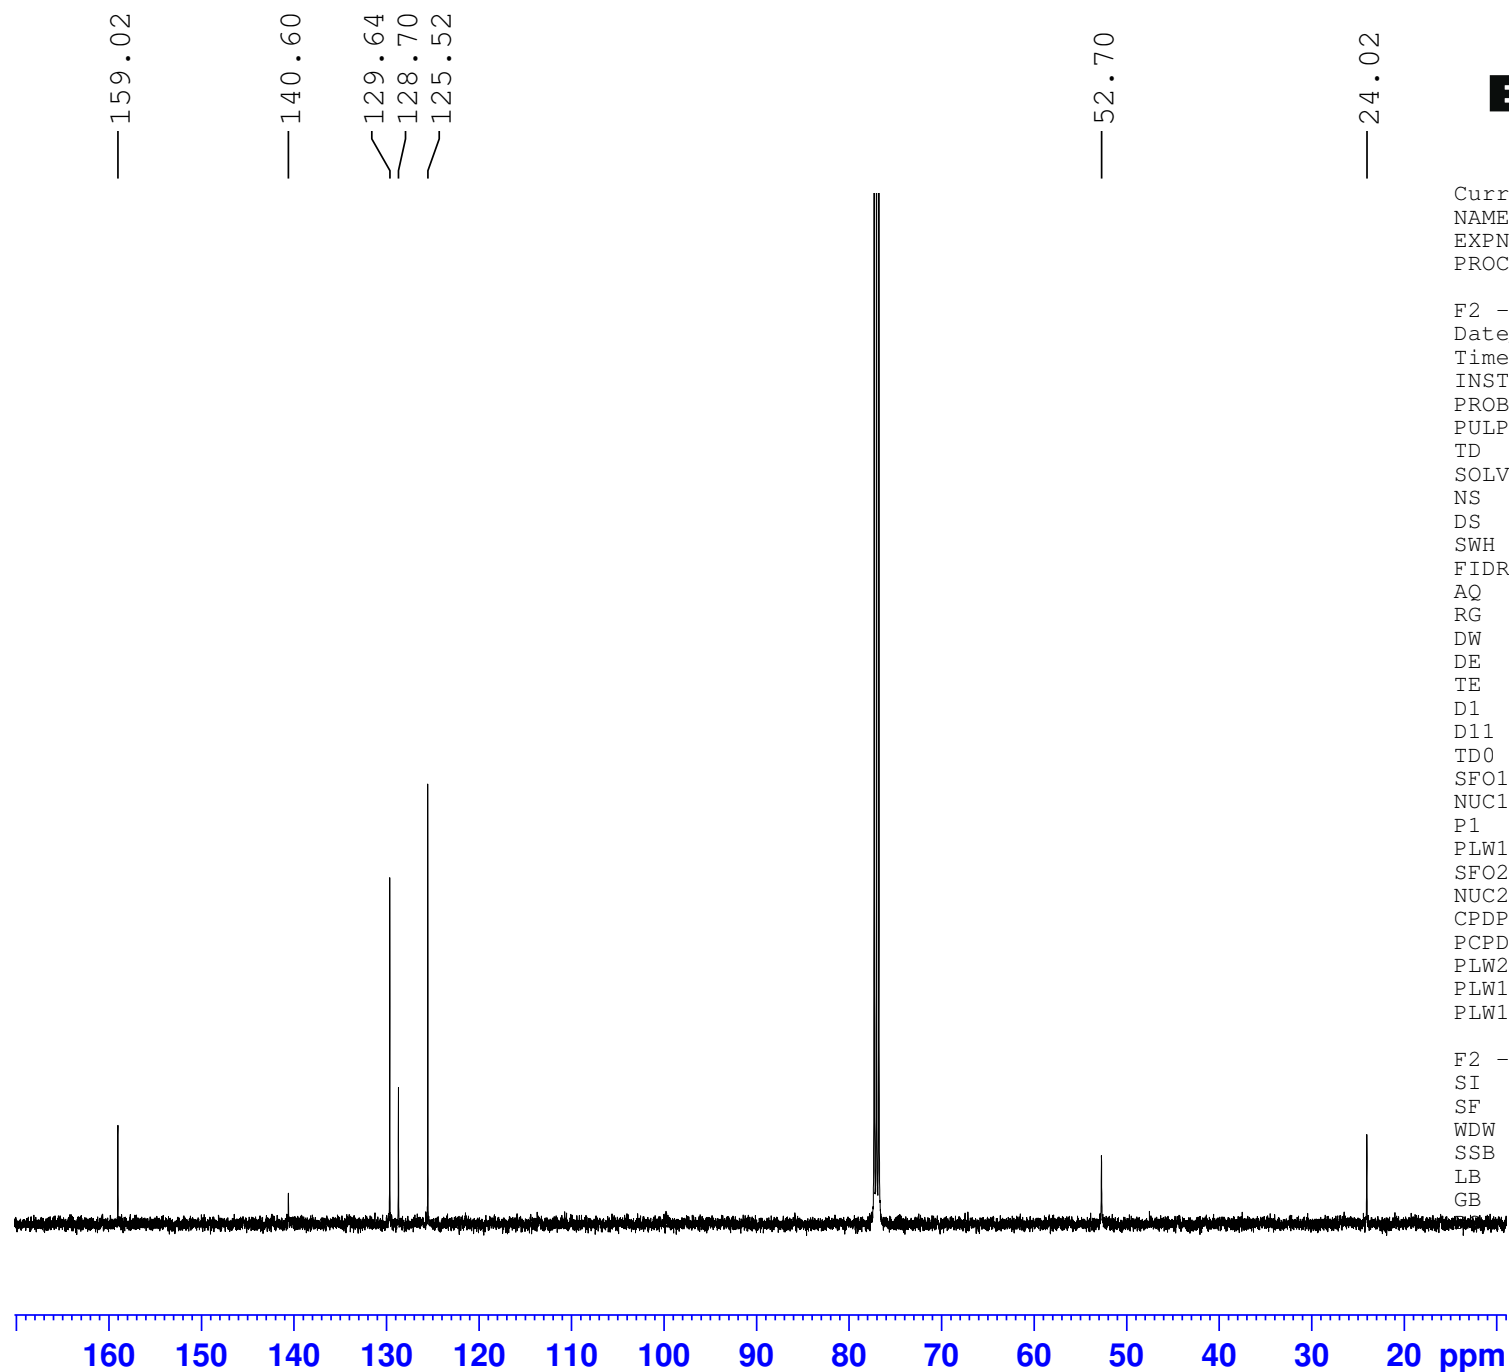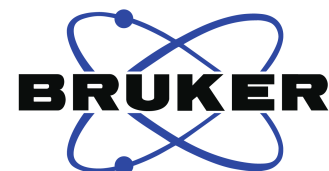

Current Data Parameters  
 NAME 2  
 EXPNO 1  
 PROCNO 1

F2 - Acquisition Parameters  
 Date\_ 20170519  
 Time 18.36 h  
 INSTRUM spect  
 PROBHD Z119470\_0187 (  
 PULPROG zgpg30  
 TD 65536  
 SOLVENT CDCl3  
 NS 1024  
 DS 4  
 SWH 29761.904 Hz  
 FIDRES 0.908261 Hz  
 AQ 1.1010048 sec  
 RG 192.72  
 DW 16.800 usec  
 DE 6.50 usec  
 TE 293.6 K  
 D1 2.00000000 sec  
 D11 0.03000000 sec  
 TD0 1  
 SFO1 125.7829381 MHz  
 NUC1 13C  
 P1 10.00 usec  
 PLW1 82.09700012 W  
 SFO2 500.1820007 MHz  
 NUC2 1H  
 CPDPRG[2] waltz16  
 PCPD2 80.00 usec  
 PLW2 18.10400009 W  
 PLW12 0.28680280 W  
 PLW13 0.14374560 W

F2 - Processing parameters  
 SI 32768  
 SF 125.7703632 MHz  
 WDW EM  
 SSB 0  
 LB 1.00 Hz  
 GB 0  
 1.40

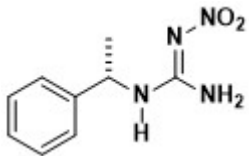

8.40  
7.427  
7.412  
7.401  
7.398  
7.362  
7.359  
7.348  
7.345  
7.335  
7.331  
6.536

— 4.622

1.621  
1.608

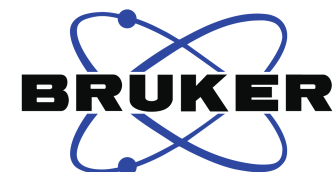

Current Data Parameters  
NAME 1H  
EXPNO 1  
PROCNO 1

F2 - Acquisition Parameters  
Date\_ 20170519  
Time 15.34 h  
INSTRUM spect  
PROBHD Z119470\_0187 (   
PULPROG zg30  
TD 65536  
SOLVENT CDCl3  
NS 16  
DS 2  
SWH 10000.000 Hz  
FIDRES 0.305176 Hz  
AQ 3.2767999 sec  
RG 139.09  
DW 50.000 usec  
DE 6.50 usec  
TE 292.2 K  
D1 1.00000000 sec  
TD0 1  
SFO1 500.1830886 MHz  
NUC1 1H  
P1 10.00 usec  
PLW1 18.10400009 W

F2 - Processing parameters  
SI 65536  
SF 500.1800094 MHz  
WDW EM  
SSB 0  
LB 0.30 Hz  
GB 0  
PC 1.00

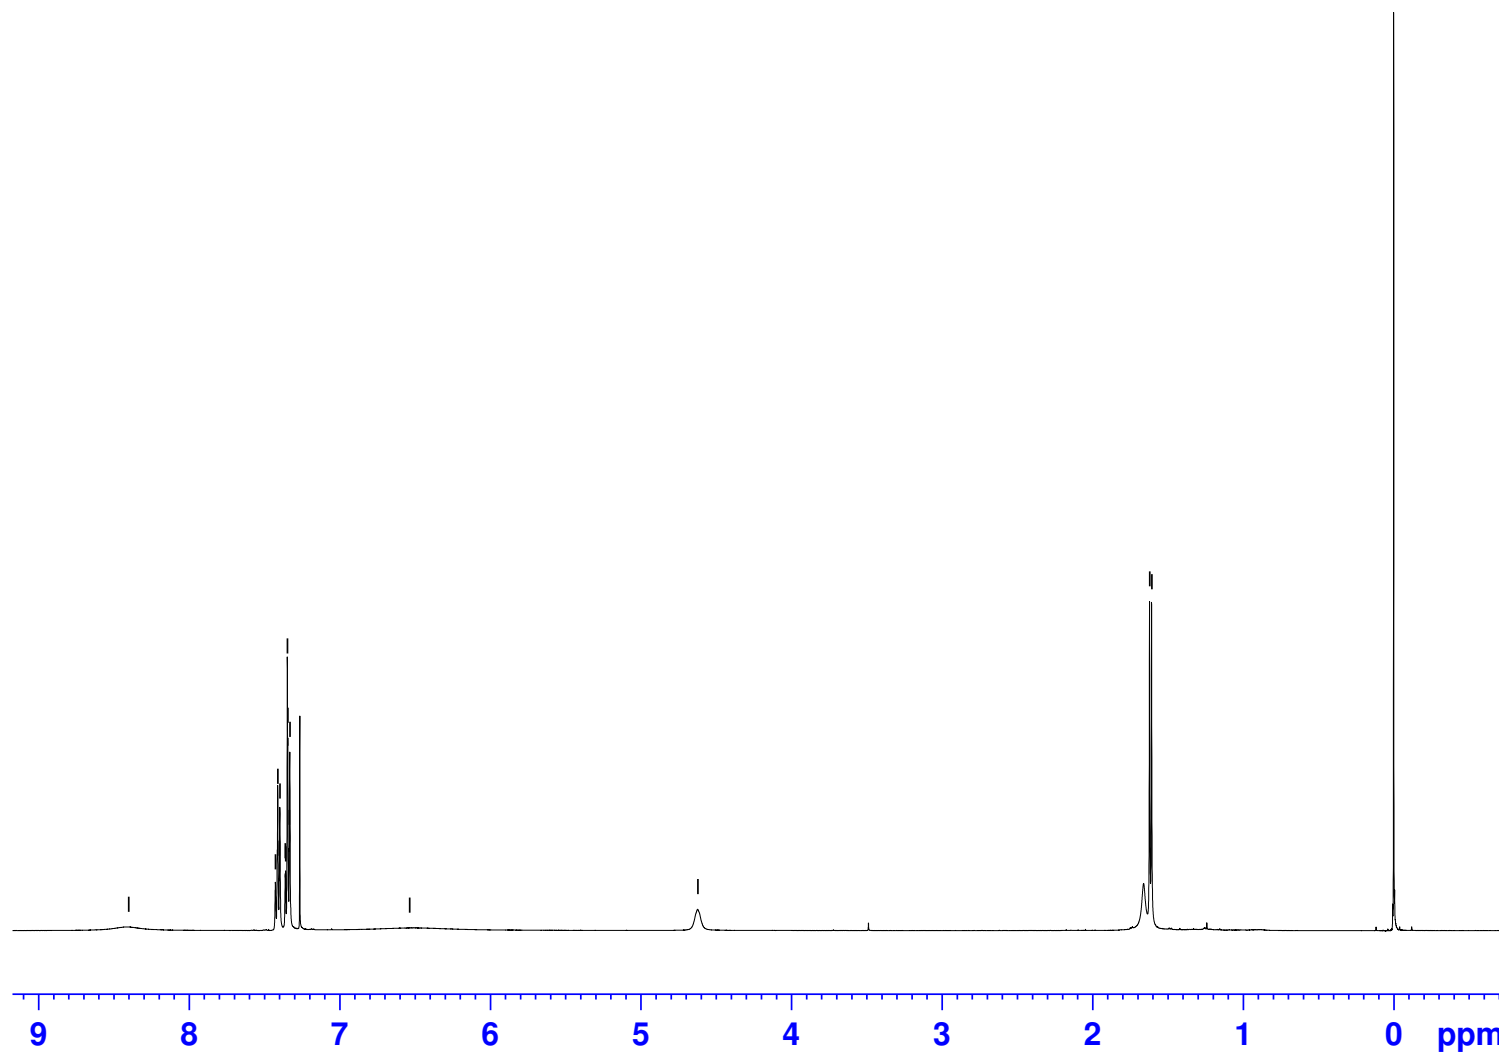

<sup>1</sup>H NMR (500 MHz, CDCl<sub>3</sub>) of **S-17**

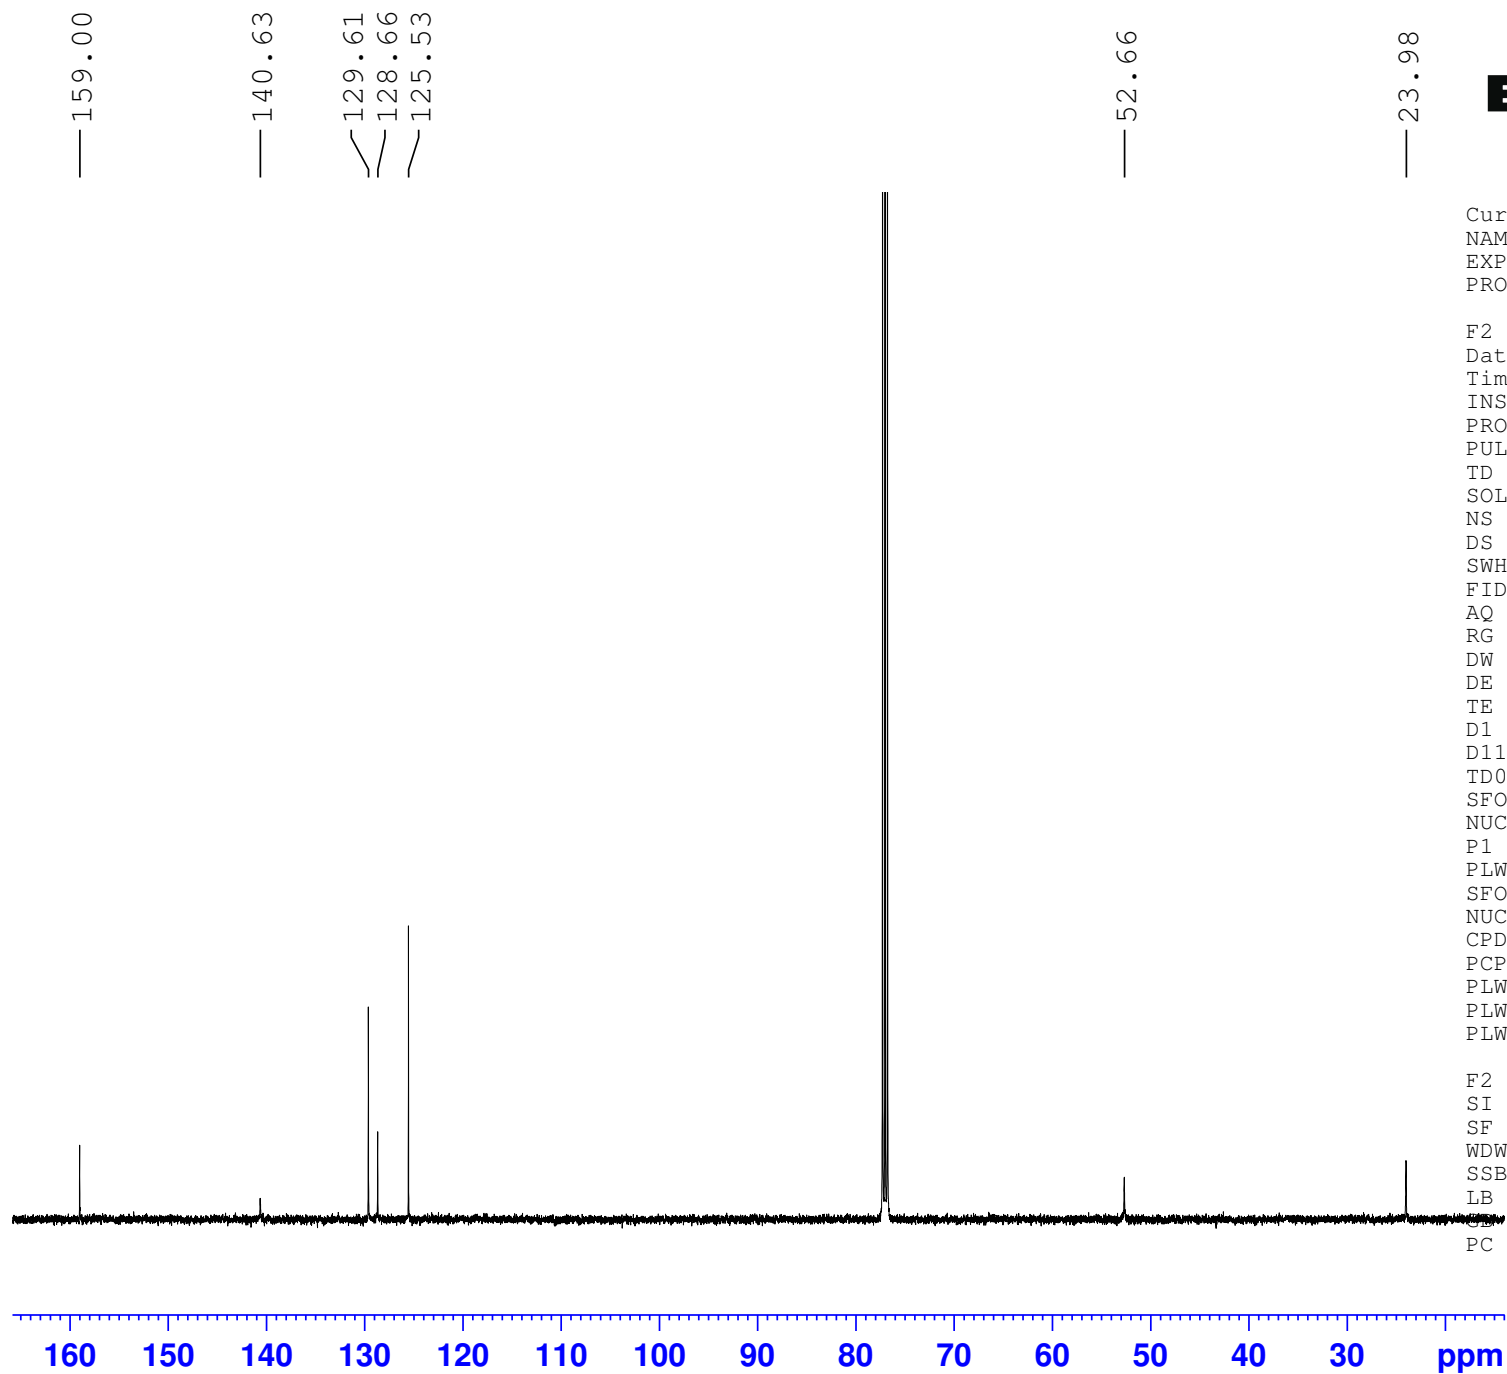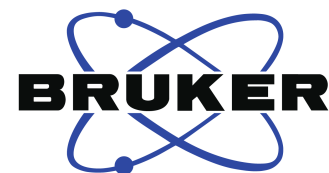

Current Data Parameters  
 NAME 13C  
 EXPNO 1  
 PROCNO 1

F2 - Acquisition Parameters  
 Date\_ 20170519  
 Time 16.41 h  
 INSTRUM spect  
 PROBHD Z119470\_0187 (   
 PULPROG zgpg30  
 TD 65536  
 SOLVENT CDCl3  
 NS 1024  
 DS 4  
 SWH 29761.904 Hz  
 FIDRES 0.908261 Hz  
 AQ 1.1010048 sec  
 RG 192.72  
 DW 16.800 usec  
 DE 6.50 usec  
 TE 293.5 K  
 D1 2.00000000 sec  
 D11 0.03000000 sec  
 TD0 1  
 SFO1 125.7829381 MHz  
 NUC1 13C  
 P1 10.00 usec  
 PLW1 82.09700012 W  
 SFO2 500.1820007 MHz  
 NUC2 1H  
 CPDPRG[2] waltz16  
 PCPD2 80.00 usec  
 PLW2 18.10400009 W  
 PLW12 0.28680280 W  
 PLW13 0.14374560 W

F2 - Processing parameters  
 SI 32768  
 SF 125.7703633 MHz  
 WDW EM  
 SSB 0  
 LB 1.00 Hz  
 GB 0  
 PC 1.40

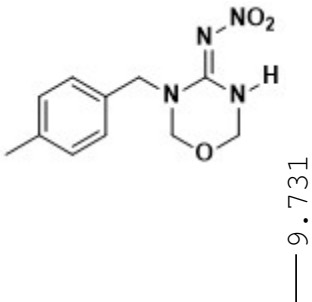

7.216  
7.200  
7.184  
7.168

4.971  
4.929  
4.565

— 3.216

— 2.300

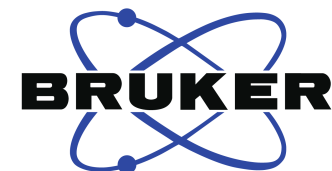

Current Data Parameters  
NAME 18  
EXPNO 1  
PROCNO 1

F2 - Acquisition Parameters  
Date\_ 20181204  
Time 11.33 h  
INSTRUM spect  
PROBHD Z119470\_0187 (  
PULPROG zg30  
TD 65536  
SOLVENT DMSO  
NS 16  
DS 2  
SWH 10000.000 Hz  
FIDRES 0.305176 Hz  
AQ 3.2767999 sec  
RG 108.3  
DW 50.000 usec  
DE 6.50 usec  
TE 323.1 K  
D1 1.00000000 sec  
TD0 1  
SFO1 500.1830886 MHz  
NUC1 1H  
P0 3.33 usec  
P1 10.00 usec  
PLW1 18.10400009 W

F2 - Processing parameters  
SI 65536  
SF 500.1800000 MHz  
WDW EM  
SSB 0  
LB 0.30 Hz  
GB 0  
PC 1.00

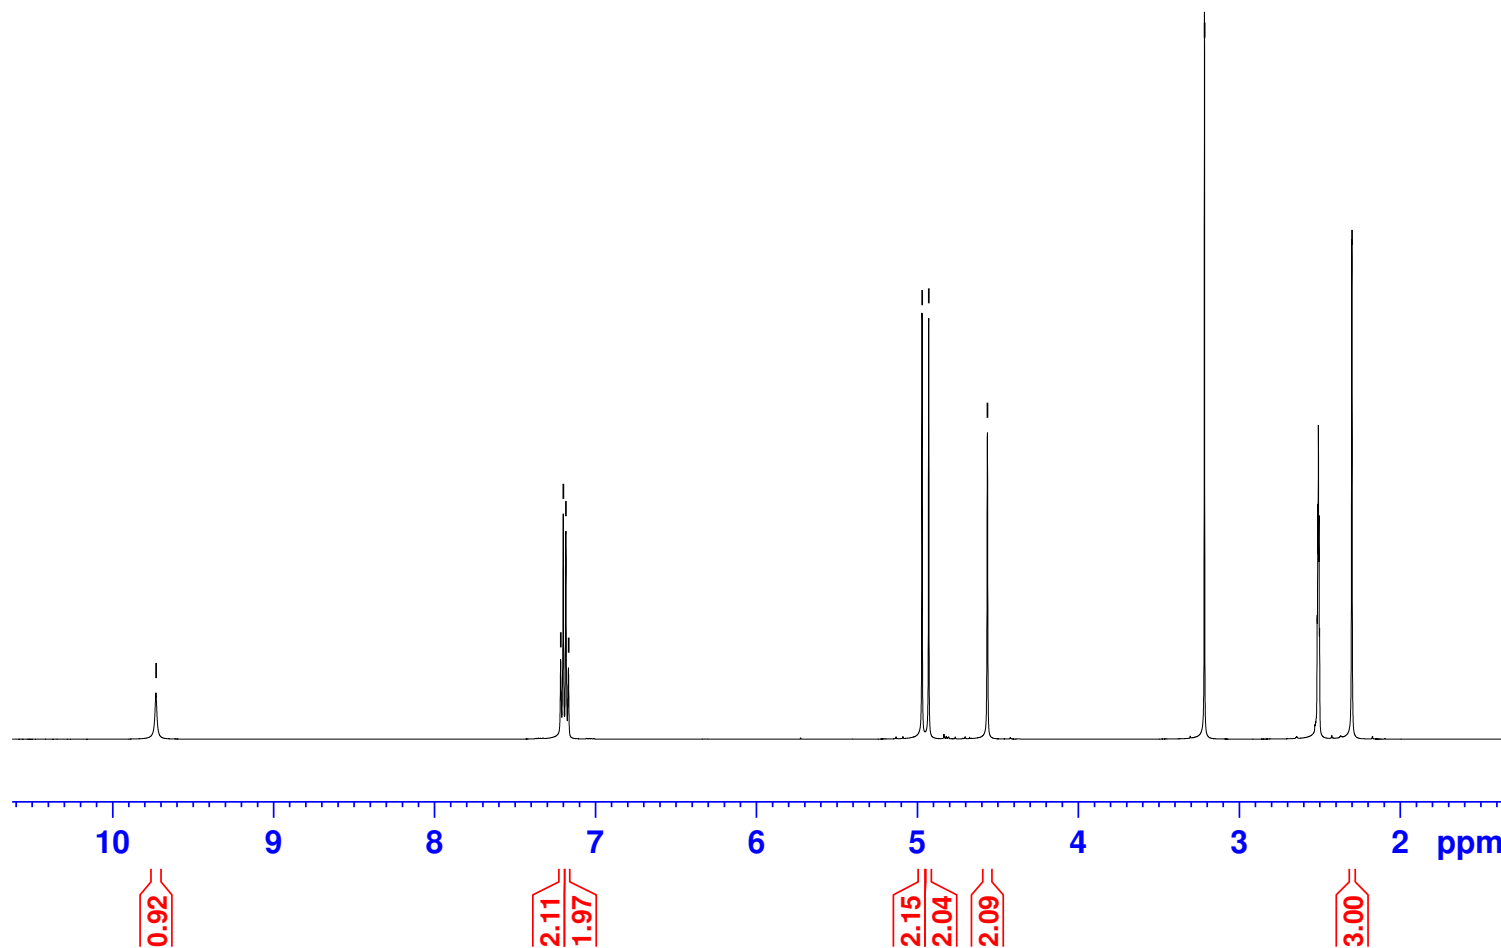

<sup>1</sup>H NMR (500 MHz, DMSO-d<sub>6</sub>, 50°C) of **18**

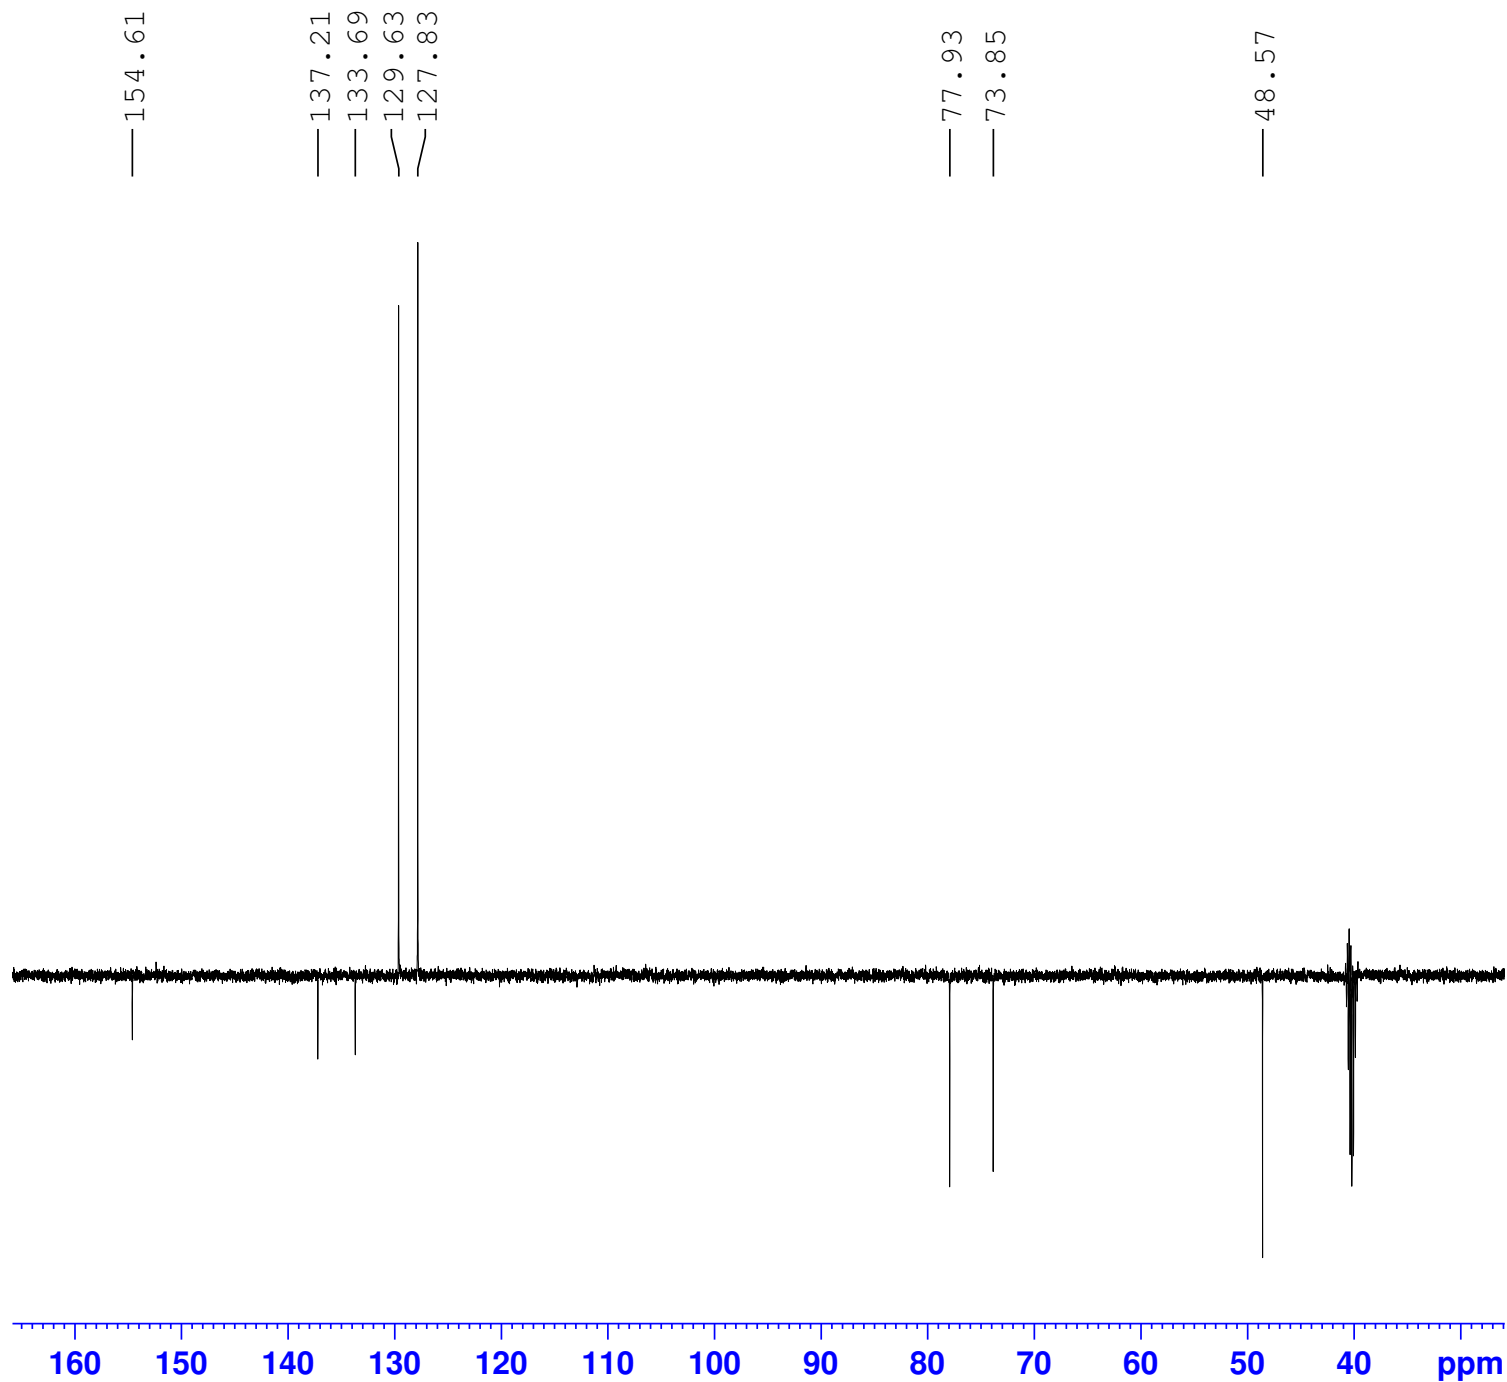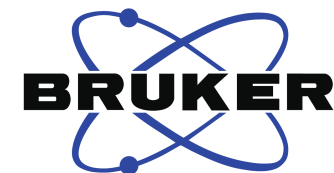

Current Data Parameters  
NAME 18  
EXPNO 2  
PROCNO 1

F2 - Acquisition Parameters  
Date\_ 20181204  
Time 11.38 h  
INSTRUM spect  
PROBHD Z119470\_0187 (  
PULPROG deptq135  
TD 65536  
SOLVENT DMSO  
NS 78  
DS 8  
SWH 29761.904 Hz  
FIDRES 0.908261 Hz  
AQ 1.1010048 sec  
RG 192.72  
DW 16.800 usec  
DE 6.50 usec  
TE 323.2 K  
CNST2 145.000000  
D1 2.00000000 sec  
D2 0.00344828 sec  
D12 0.00002000 sec  
TD0 1  
SFO1 125.7829381 MHz  
NUC1 13C  
P1 10.00 usec  
P2 20.00 usec  
PLW1 82.09700012 W  
SFO2 500.1820007 MHz  
NUC2 1H  
CPDPRG[2] waltz16  
P0 15.00 usec  
P3 10.00 usec  
P4 20.00 usec  
PCPD2 80.00 usec  
PLW2 18.10400009 W  
PLW12 0.28288001 W

F2 - Processing parameters  
SI 32768  
SF 125.7703610 MHz  
WDW EM  
SSB 0  
LB 1.00 Hz  
GB 0  
PC 1.40

$^{13}\text{C}$  (DEPTQ135) NMR (125 MHz, DMSO- $\text{d}_6$ , 50°C) of **18**



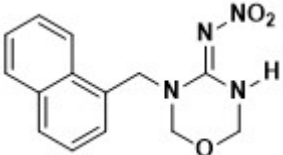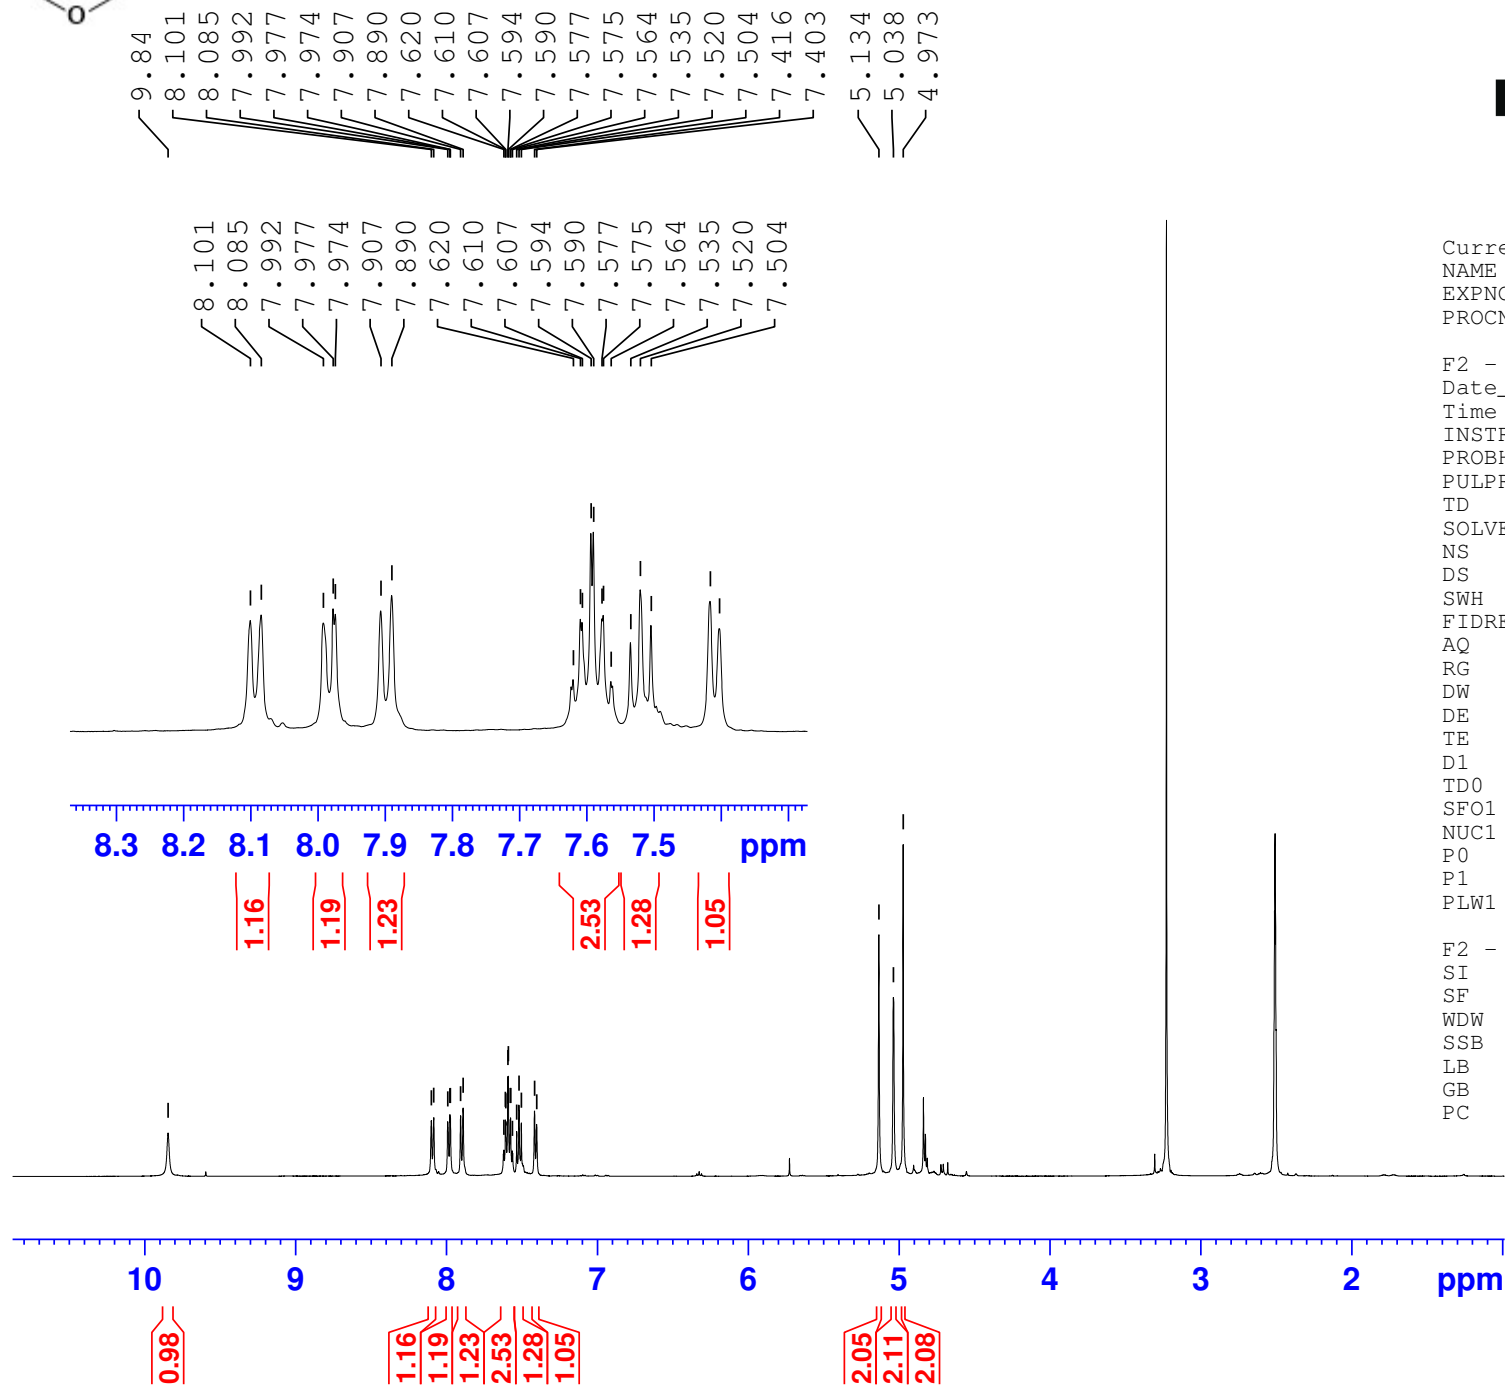

Current Data Parameters  
NAME 19  
EXPNO 1  
PROCNO 1

F2 - Acquisition Parameters  
Date\_ 20181204  
Time 9.03 h  
INSTRUM spect  
PROBHD Z119470\_0187 (  
PULPROG zg30  
TD 65536  
SOLVENT DMSO  
NS 16  
DS 2  
SWH 10000.000 Hz  
FIDRES 0.305176 Hz  
AQ 3.2767999 sec  
RG 95.16  
DW 50.000 usec  
DE 6.50 usec  
TE 323.1 K  
D1 1.00000000 sec  
TD0 1  
SFO1 500.1830886 MHz  
NUC1 1H  
P0 3.33 usec  
P1 10.00 usec  
PLW1 18.10400009 W

F2 - Processing parameters  
SI 65536  
SF 500.1800000 MHz  
WDW EM  
SSB 0  
LB 0.30 Hz  
GB 0  
PC 1.00

<sup>1</sup>H NMR (500 MHz, DMSO-d<sub>6</sub>, 50°C) of **19**

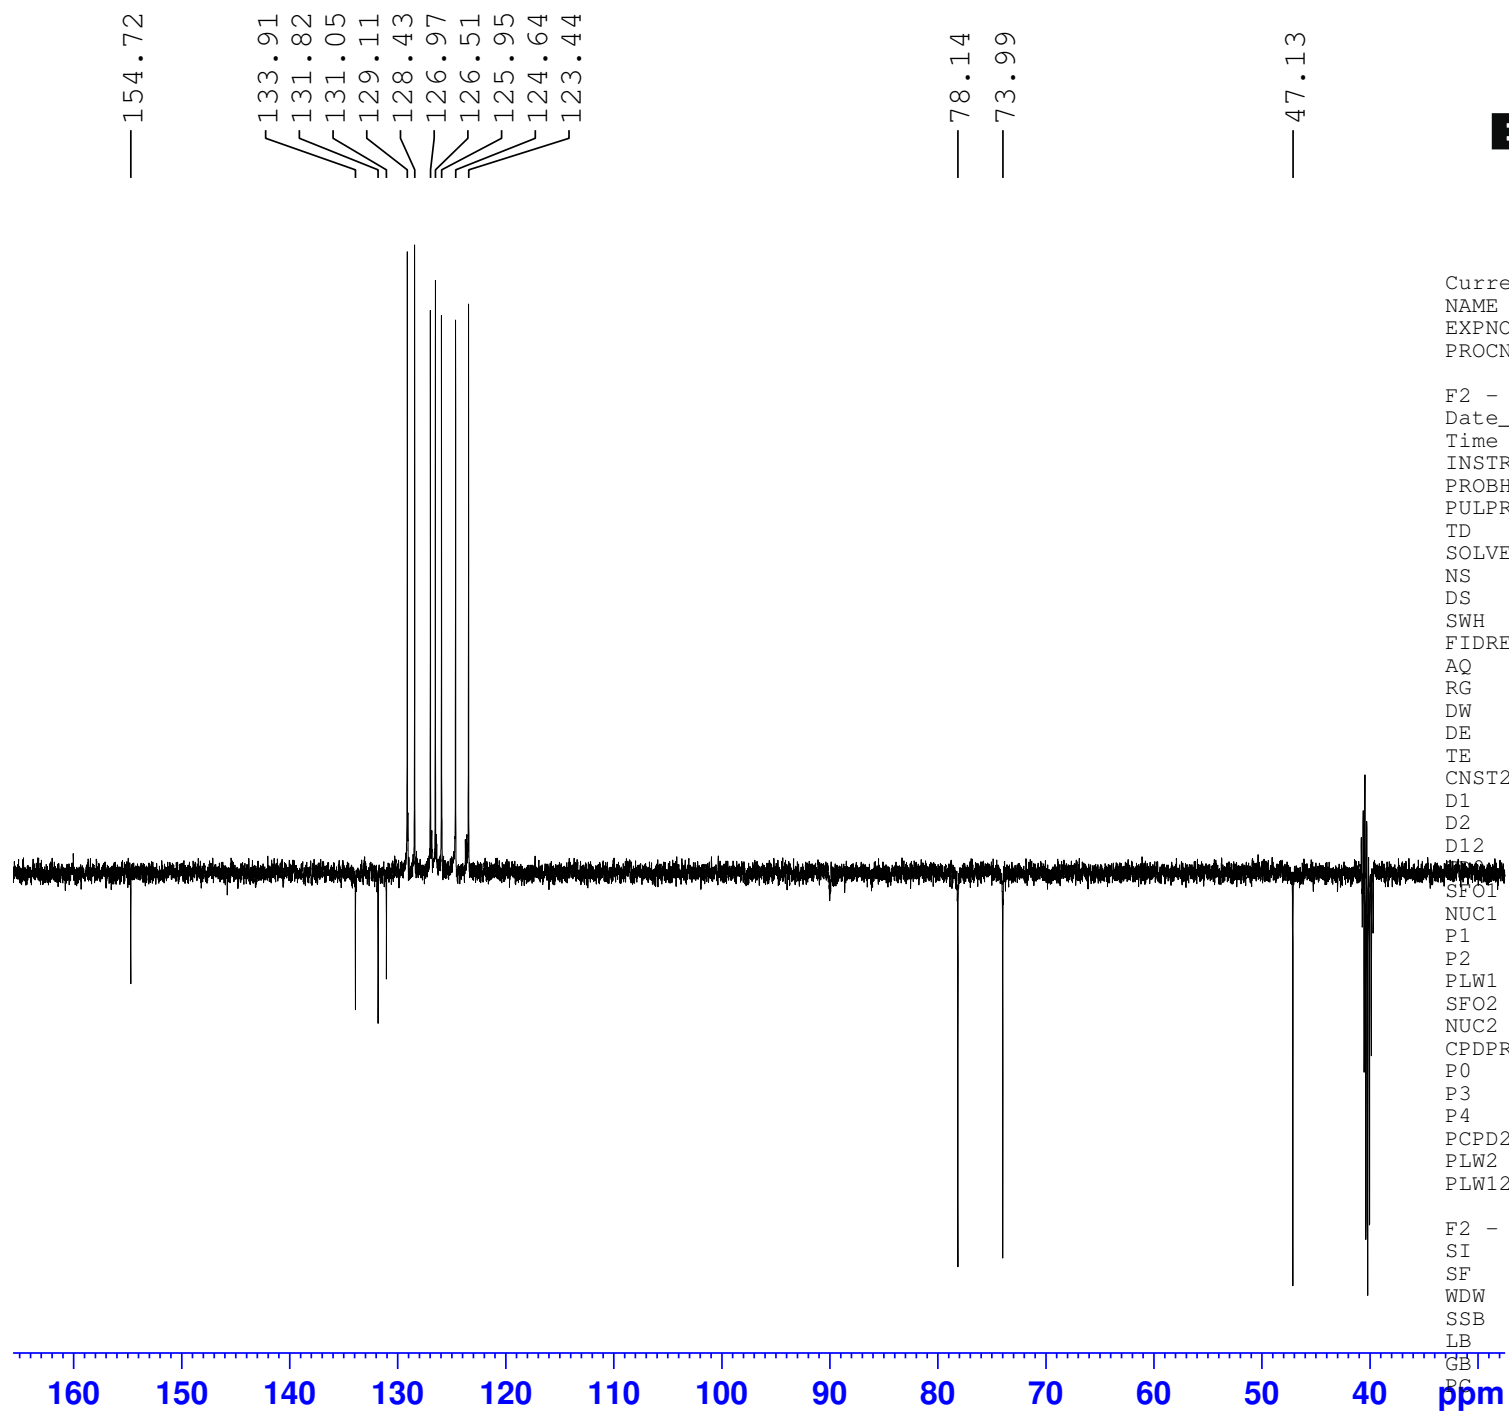

Current Data Parameters  
NAME 19  
EXPNO 2  
PROCNO 1

F2 - Acquisition Parameters  
Date\_ 20181204  
Time 9.13 h  
INSTRUM spect  
PROBHD Z119470\_0187 (  
PULPROG deptq135  
TD 65536  
SOLVENT DMSO  
NS 172  
DS 8  
SWH 29761.904 Hz  
FIDRES 0.908261 Hz  
AQ 1.1010048 sec  
RG 192.72  
DW 16.800 usec  
DE 6.50 usec  
TE 323.2 K  
CNST2 145.000000  
D1 2.00000000 sec  
D2 0.00344828 sec  
D12 0.00002000 sec  
SFO1 125.7829381 MHz  
NUC1 13C  
P1 10.00 usec  
P2 20.00 usec  
PLW1 82.09700012 W  
SFO2 500.1820007 MHz  
NUC2 1H  
CPDPRG[2] waltz16  
P0 15.00 usec  
P3 10.00 usec  
P4 20.00 usec  
PCPD2 80.00 usec  
PLW2 18.10400009 W  
PLW12 0.28288001 W

F2 - Processing parameters  
SI 32768  
SF 125.7703610 MHz  
WDW EM  
SSB 0  
LB 1.00 Hz  
GB 0  
PC 1.40

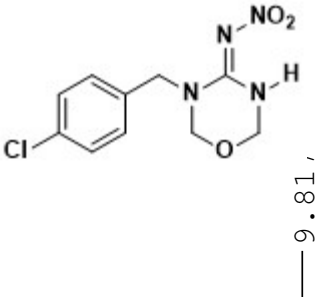

7.445  
7.429  
7.342  
7.326

4.975  
4.966  
4.588

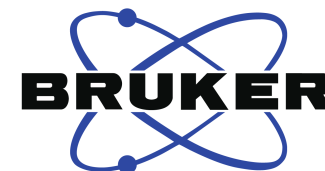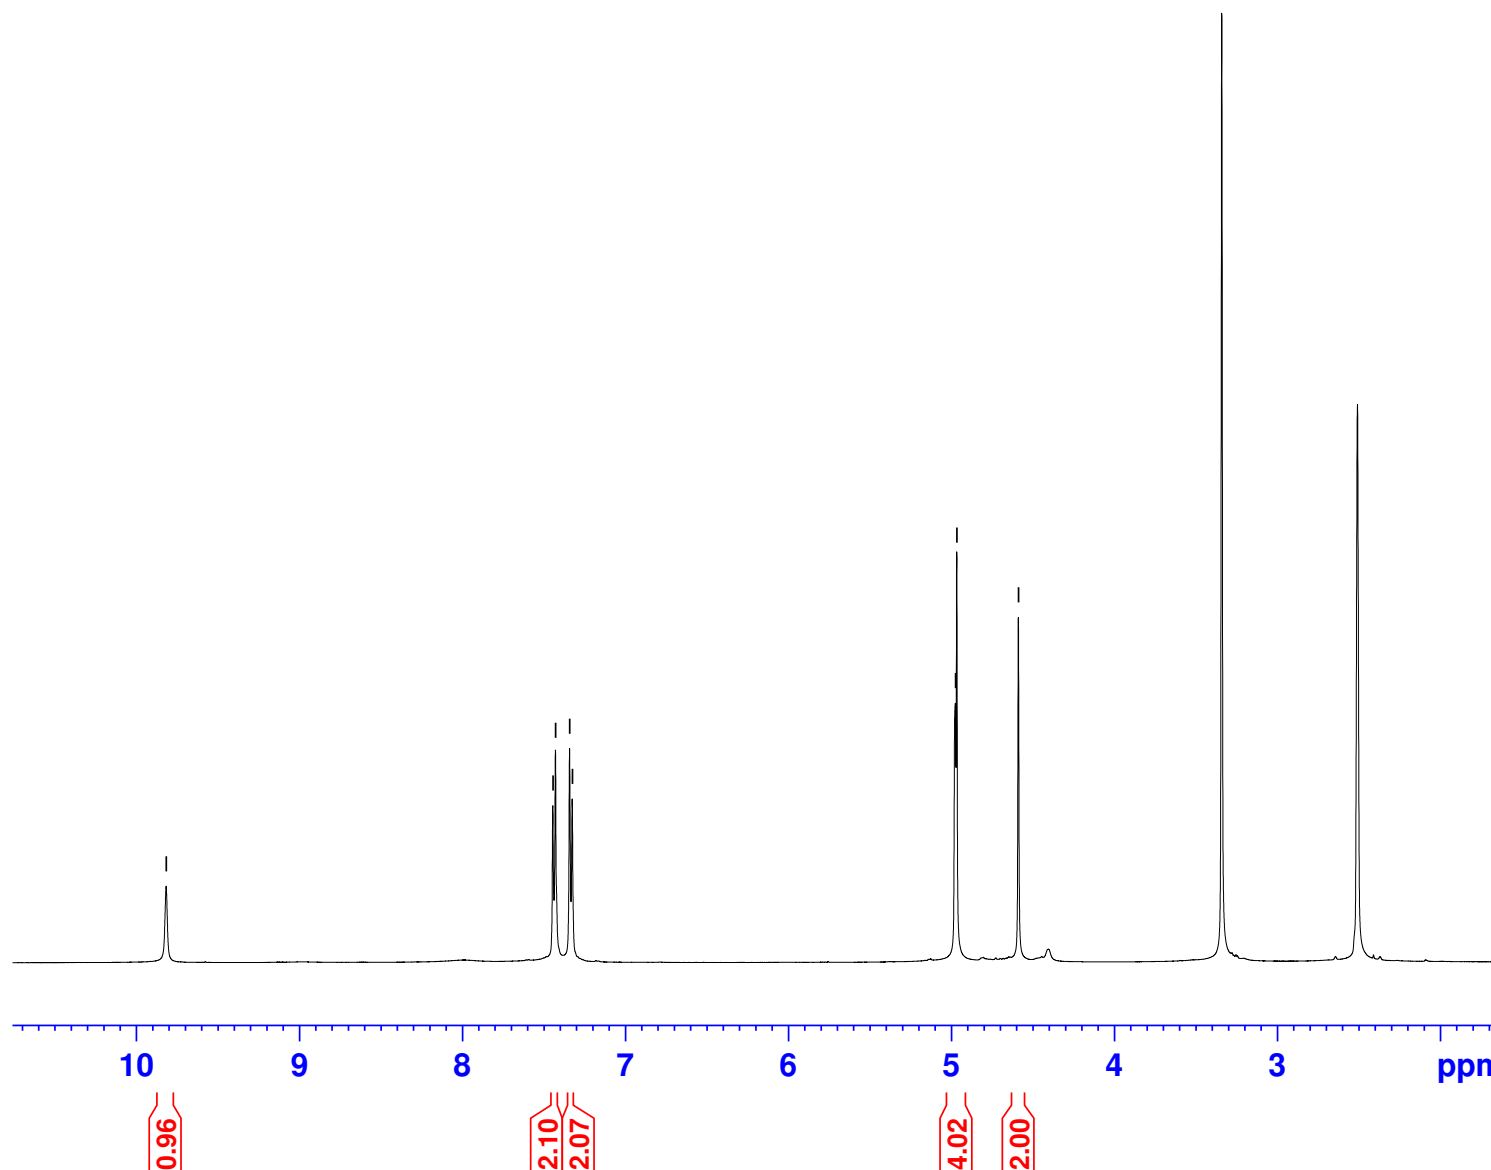

Current Data Parameters  
NAME 20  
EXPNO 1  
PROCNO 1

F2 - Acquisition Parameters  
Date\_ 20181204  
Time 15.14 h  
INSTRUM spect  
PROBHD Z119470\_0187 (  
PULPROG zg30  
TD 65536  
SOLVENT DMSO  
NS 16  
DS 1  
SWH 10000.000 Hz  
FIDRES 0.305176 Hz  
AQ 3.2767999 sec  
RG 139.09  
DW 50.000 usec  
DE 6.50 usec  
TE 298.0 K  
D1 1.00000000 sec  
TD0 1  
SFO1 500.1830886 MHz  
NUC1 1H  
P0 3.33 usec  
P1 10.00 usec  
PLW1 18.10400009 W

F2 - Processing parameters  
SI 65536  
SF 500.1800000 MHz  
WDW EM  
SSB 0  
LB 0.30 Hz  
GB 0  
PC 1.00

<sup>1</sup>H NMR (500 MHz, DMSO-d<sub>6</sub>) of **20**

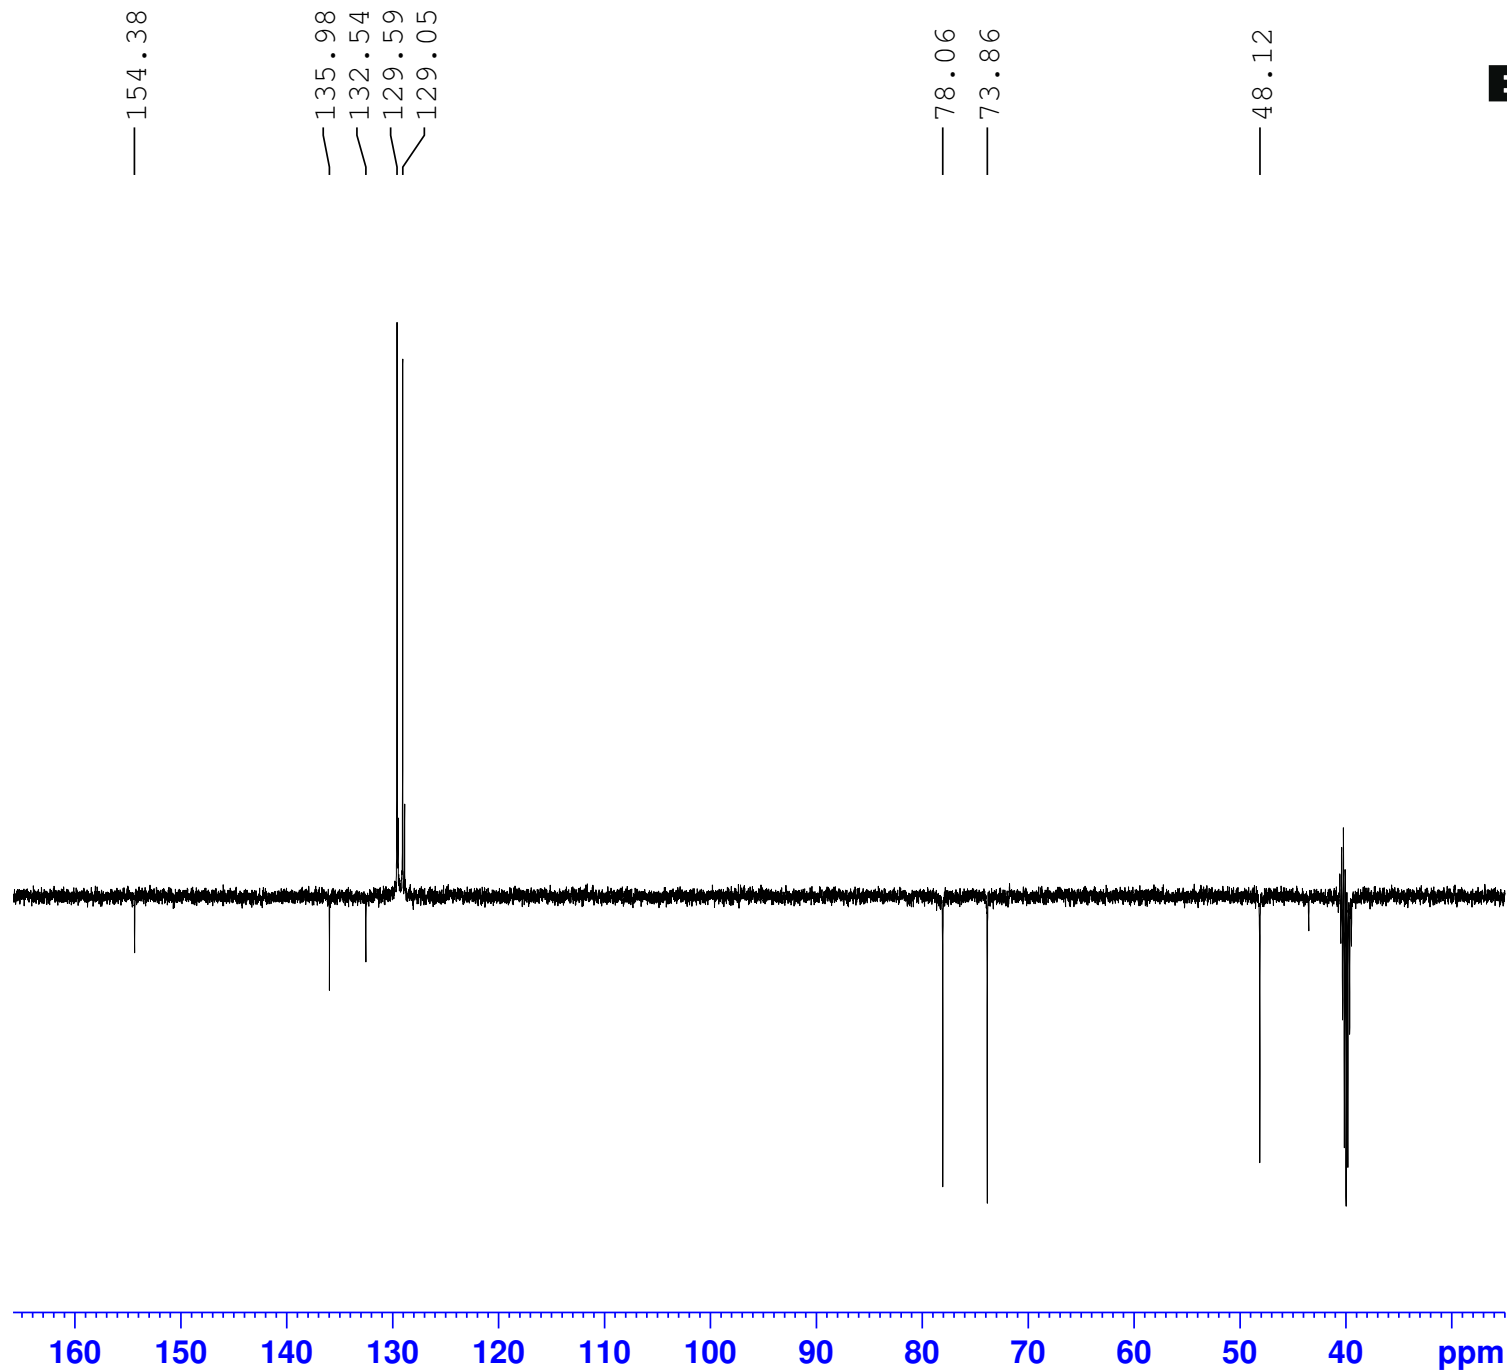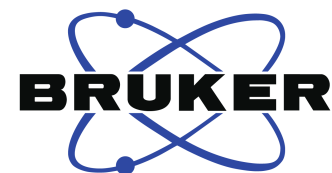

Current Data Parameters  
 NAME 20  
 EXPNO 2  
 PROCNO 1

F2 - Acquisition Parameters  
 Date\_ 20181204  
 Time 15.21 h  
 INSTRUM spect  
 PROBHD Z119470\_0187 (  
 PULPROG deptq135  
 TD 65536  
 SOLVENT DMSO  
 NS 122  
 DS 8  
 SWH 29761.904 Hz  
 FIDRES 0.908261 Hz  
 AQ 1.1010048 sec  
 RG 192.72  
 DW 16.800 usec  
 DE 6.50 usec  
 TE 296.0 K  
 CNST2 145.000000  
 D1 2.00000000 sec  
 D2 0.00344828 sec  
 D12 0.00002000 sec  
 TD0 1  
 SFO1 125.7829381 MHz  
 NUC1 13C  
 P1 10.00 usec  
 P2 20.00 usec  
 PLW1 82.09700012 W  
 SFO2 500.1820007 MHz  
 NUC2 1H  
 CPDPRG[2] waltz16  
 P0 15.00 usec  
 P3 10.00 usec  
 P4 20.00 usec  
 PCPD2 80.00 usec  
 PLW2 18.10400009 W  
 PLW12 0.28288001 W

F2 - Processing parameters  
 SI 32768  
 SF 125.7703610 MHz  
 WDW EM  
 SSB 0  
 LB 1.00 Hz  
 GB 0  
 PC 1.40

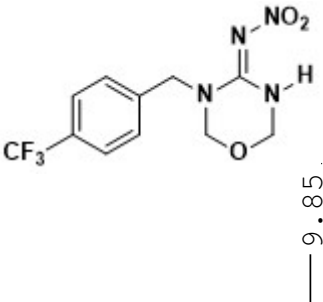

7.756  
7.740  
7.517  
7.501

5.004  
4.996  
4.689

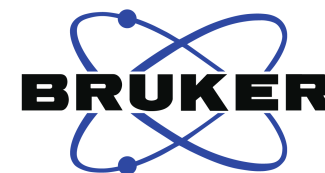

Current Data Parameters  
NAME 21  
EXPNO 3  
PROCNO 1

F2 - Acquisition Parameters  
Date\_ 20180907  
Time 12.51 h  
INSTRUM spect  
PROBHD z119470\_0187 (  
PULPROG zg30  
TD 65536  
SOLVENT DMSO  
NS 16  
DS 2  
SWH 10000.000 Hz  
FIDRES 0.305176 Hz  
AQ 3.2767999 sec  
RG 88.37  
DW 50.000 usec  
DE 6.50 usec  
TE 291.9 K  
D1 1.00000000 sec  
TD0 1  
SFO1 500.1830886 MHz  
NUC1 1H  
P0 3.33 usec  
P1 10.00 usec  
PLW1 18.10400009 W

F2 - Processing parameters  
SI 65536  
SF 500.1800000 MHz  
WDW EM  
SSB 0  
LB 0.30 Hz  
GB 0  
PC 1.00

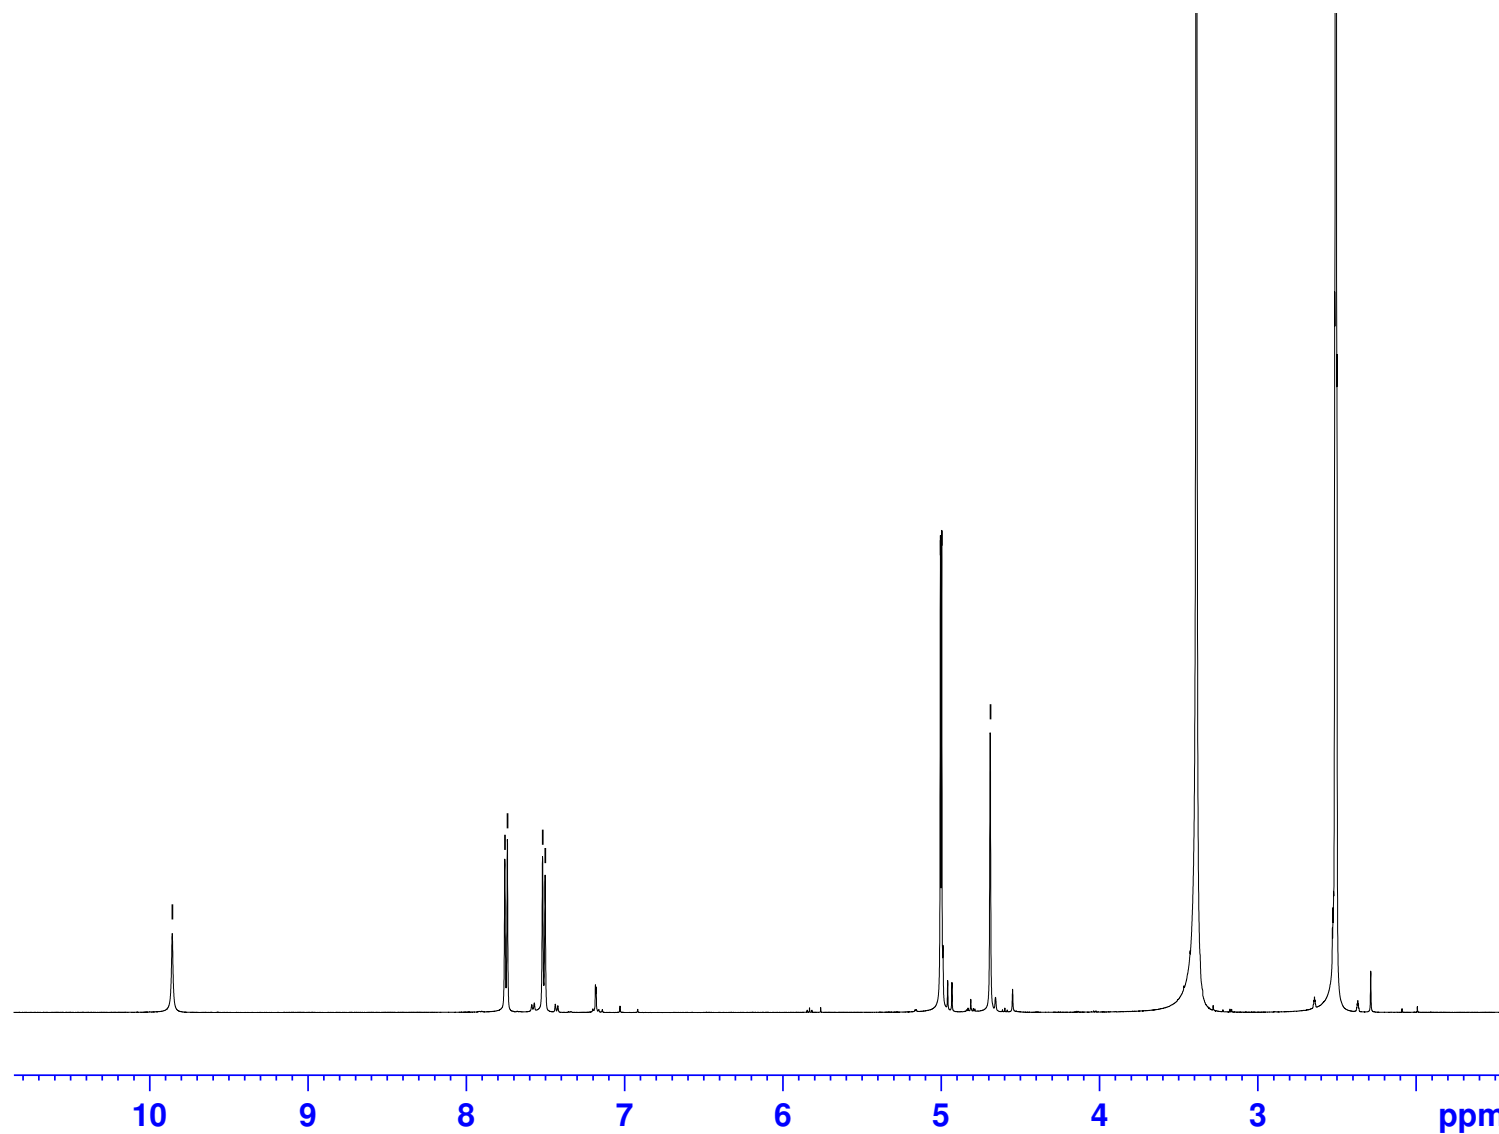

0.99

2.09 2.09

1.99 1.90 2.00

<sup>1</sup>H NMR (500 MHz, DMSO-d<sub>6</sub>) of **21**

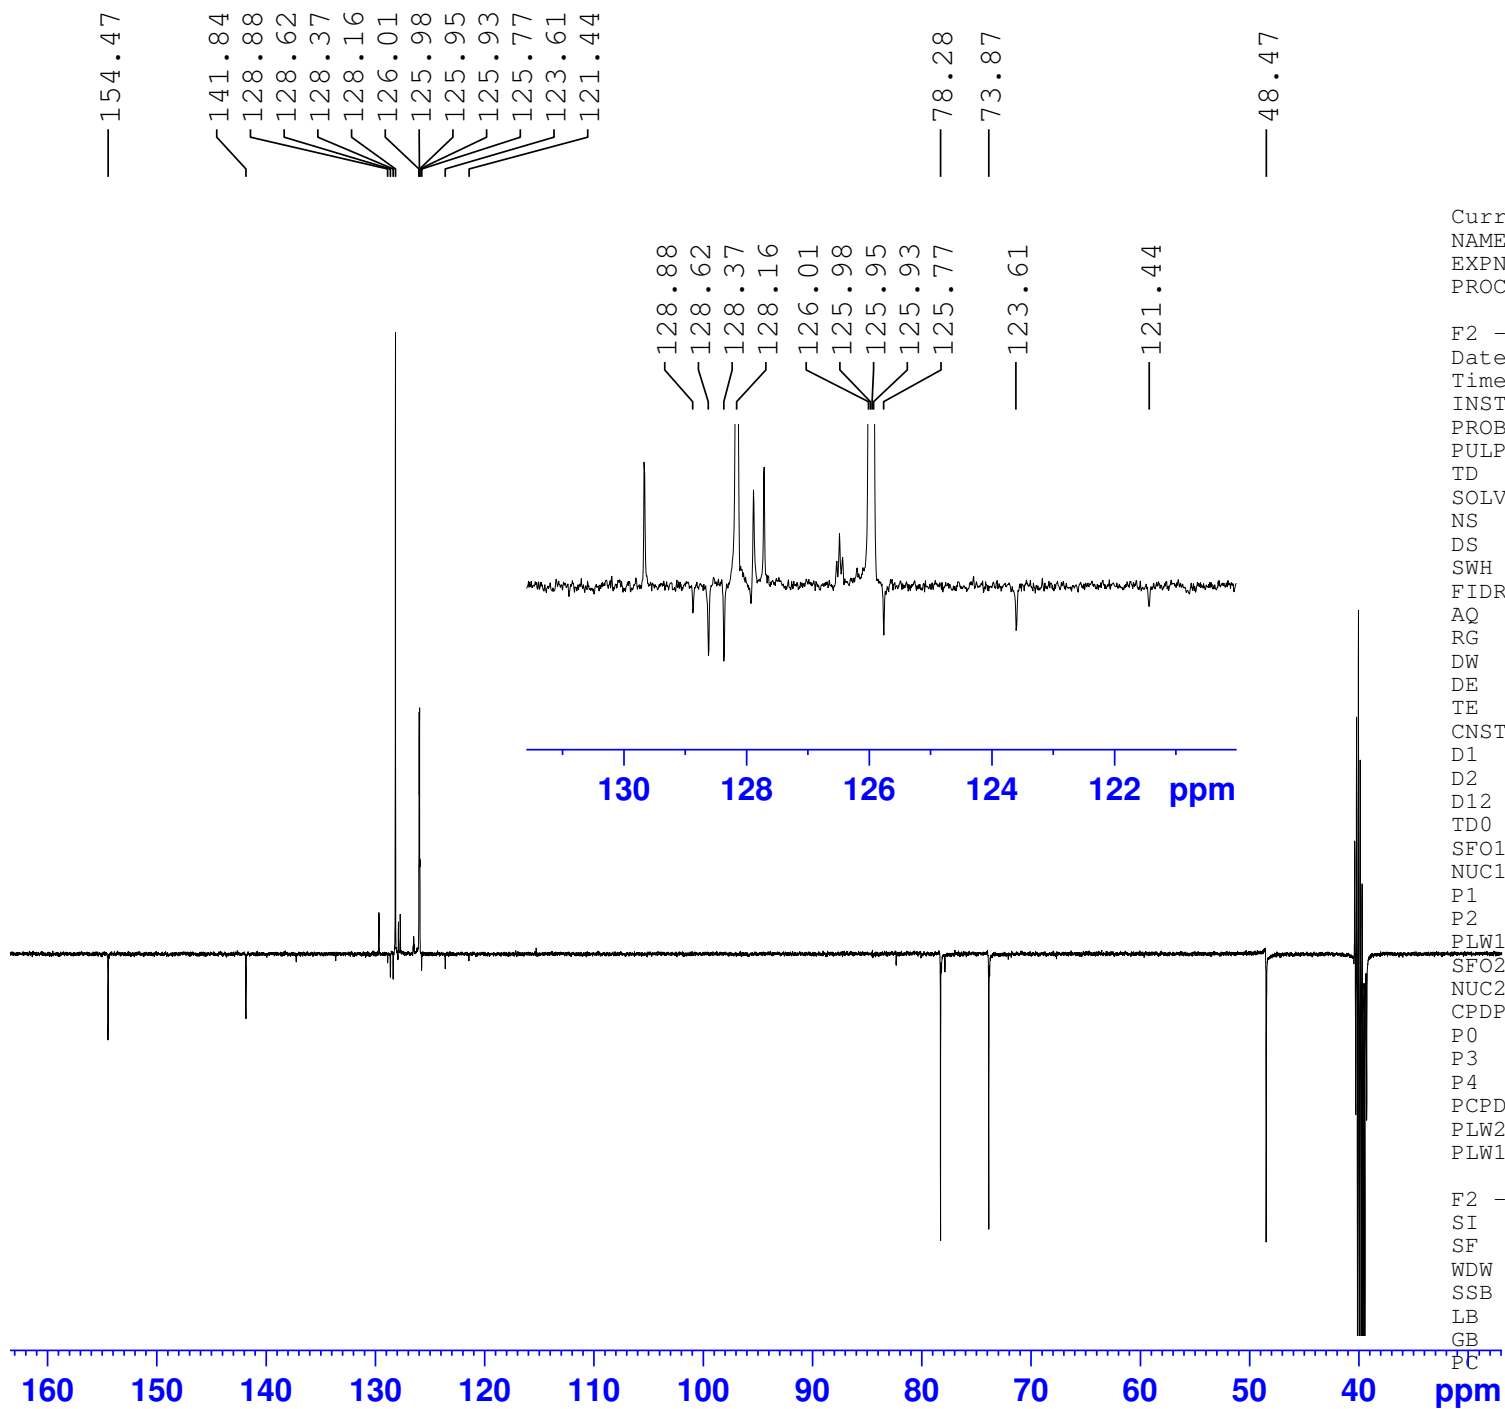

#### Current Data Parameters

NAME 21  
EXPNO 4  
PROCNO 1

#### F2 - Acquisition Parameters

Date\_ 20180926  
Time 10.05 h  
INSTRUM spect  
PROBHD z119470\_0187 (  
PULPROG deptq135  
TD 65536  
SOLVENT DMSO  
NS 17064  
DS 8  
SWH 29761.904 Hz  
FIDRES 0.908261 Hz  
AQ 1.1010048 sec  
RG 192.72  
DW 16.800 usec  
DE 6.50 usec  
TE 295.4 K  
CNST2 145.000000  
D1 2.0000000 sec  
D2 0.00344828 sec  
D12 0.00002000 sec  
TD0 1  
SF01 125.7829381 MHz  
NUC1 13C  
P1 10.00 usec  
P2 20.00 usec  
PLW1 82.09700012 W  
SF02 500.1820007 MHz  
NUC2 1H  
CPDPRG[2] waltz16  
P0 15.00 usec  
P3 10.00 usec  
P4 20.00 usec  
PCPD2 80.00 usec  
PLW2 18.10400009 W  
PLW12 0.28288001 W

#### F2 - Processing parameters

SI 32768  
SF 125.7703610 MHz  
WDW EM  
SSB 0  
LB 1.00 Hz  
GB 0  
PC 1.40

— -60.87

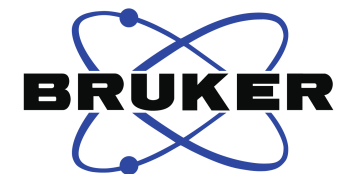

Current Data Parameters  
NAME ARH-8  
EXPNO 1  
PROCNO 1

F2 - Acquisition Parameters  
Date\_ 20190801  
Time 14.44 h  
INSTRUM spect  
PROBHD Z119470\_0187 (  
PULPROG zgfhigqn.2  
TD 131072  
SOLVENT DMSO  
NS 16  
DS 4  
SWH 113636.367 Hz  
FIDRES 1.733953 Hz  
AQ 0.5767168 sec  
RG 11.27  
DW 4.400 usec  
DE 6.50 usec  
TE 293.4 K  
D1 1.00000000 sec  
D11 0.03000000 sec  
D12 0.00002000 sec  
TD0 1  
SFO1 470.5923603 MHz  
NUC1 19F  
P1 16.00 usec  
PLW1 36.93899918 W  
SFO2 500.1820007 MHz  
NUC2 1H  
CPDPRG[2] waltz16  
PCPD2 80.00 usec  
PLW2 18.10400009 W  
PLW12 0.31009001 W

F2 - Processing parameters  
SI 65536  
SF 470.6394242 MHz  
WDW EM  
SSB 0  
LB 0.30 Hz  
GB 0  
PC 1.00

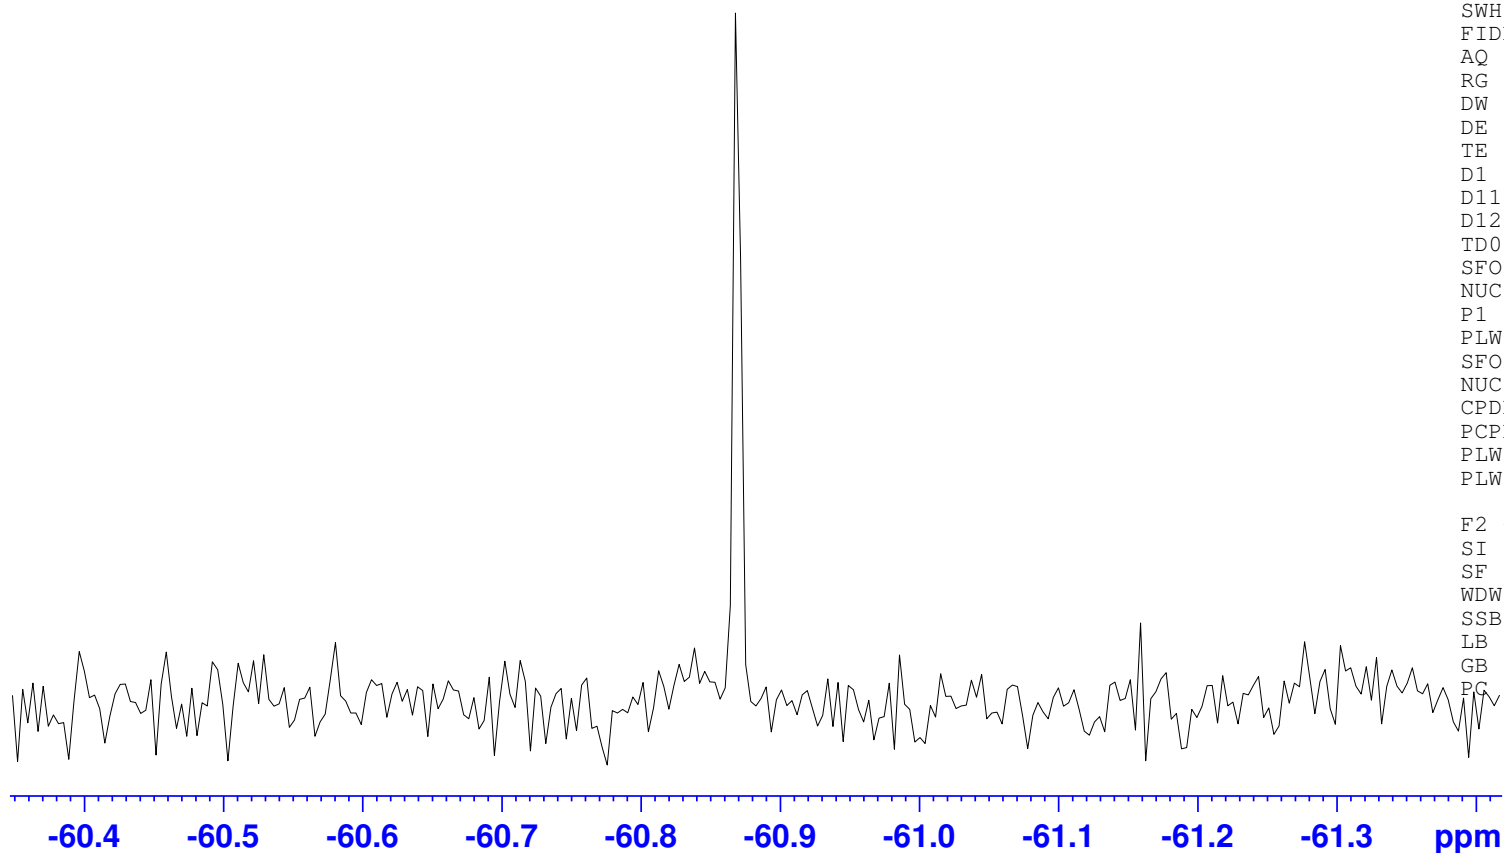

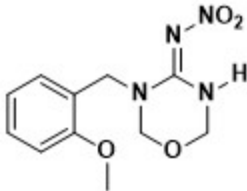

— 9.709

7.307  
7.303  
7.290  
7.288  
7.275  
7.272  
7.216  
7.213  
7.201  
7.198  
7.033  
7.017  
6.964  
6.962  
6.949  
6.947  
6.934  
6.932  
4.982  
4.959  
— 4.536

7.303  
7.290  
7.288  
7.275  
7.272  
7.216  
7.213  
7.201  
7.198

7.033  
7.017  
6.964  
6.962  
6.949  
6.947

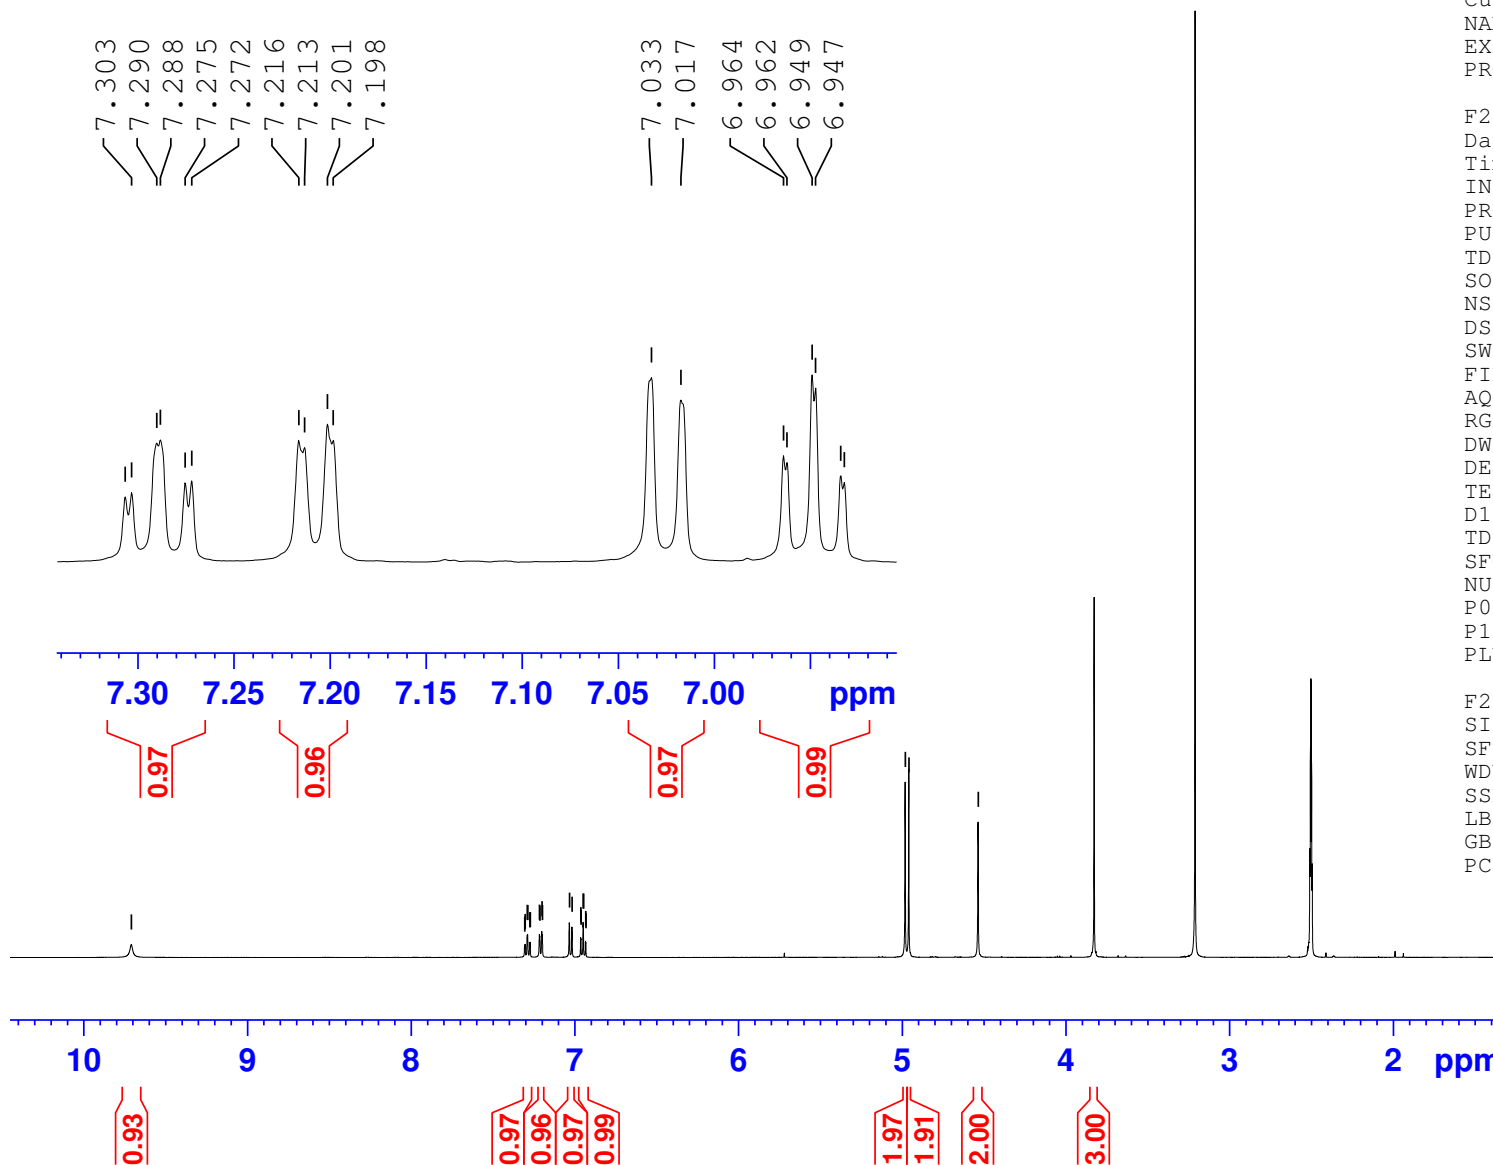

Current Data Parameters  
NAME 22  
EXPNO 1  
PROCNO 1

F2 - Acquisition Parameters  
Date\_ 20181204  
Time 12.30 h  
INSTRUM spect  
PROBHD z119470\_0187 (  
PULPROG zg30  
TD 65536  
SOLVENT DMSO  
NS 16  
DS 2  
SWH 10000.000 Hz  
FIDRES 0.305176 Hz  
AQ 3.2767999 sec  
RG 139.09  
DW 50.000 usec  
DE 6.50 usec  
TE 323.0 K  
D1 1.00000000 sec  
TD0 1  
SFO1 500.1830886 MHz  
NUC1 1H  
P0 3.33 usec  
P1 10.00 usec  
PLW1 18.10400009 W

F2 - Processing parameters  
SI 65536  
SF 500.1800000 MHz  
WDW EM  
SSB 0  
LB 0.30 Hz  
GB 0  
PC 1.00

<sup>1</sup>H NMR (500 MHz, DMSO-d<sub>6</sub>, 50°C) of **22**



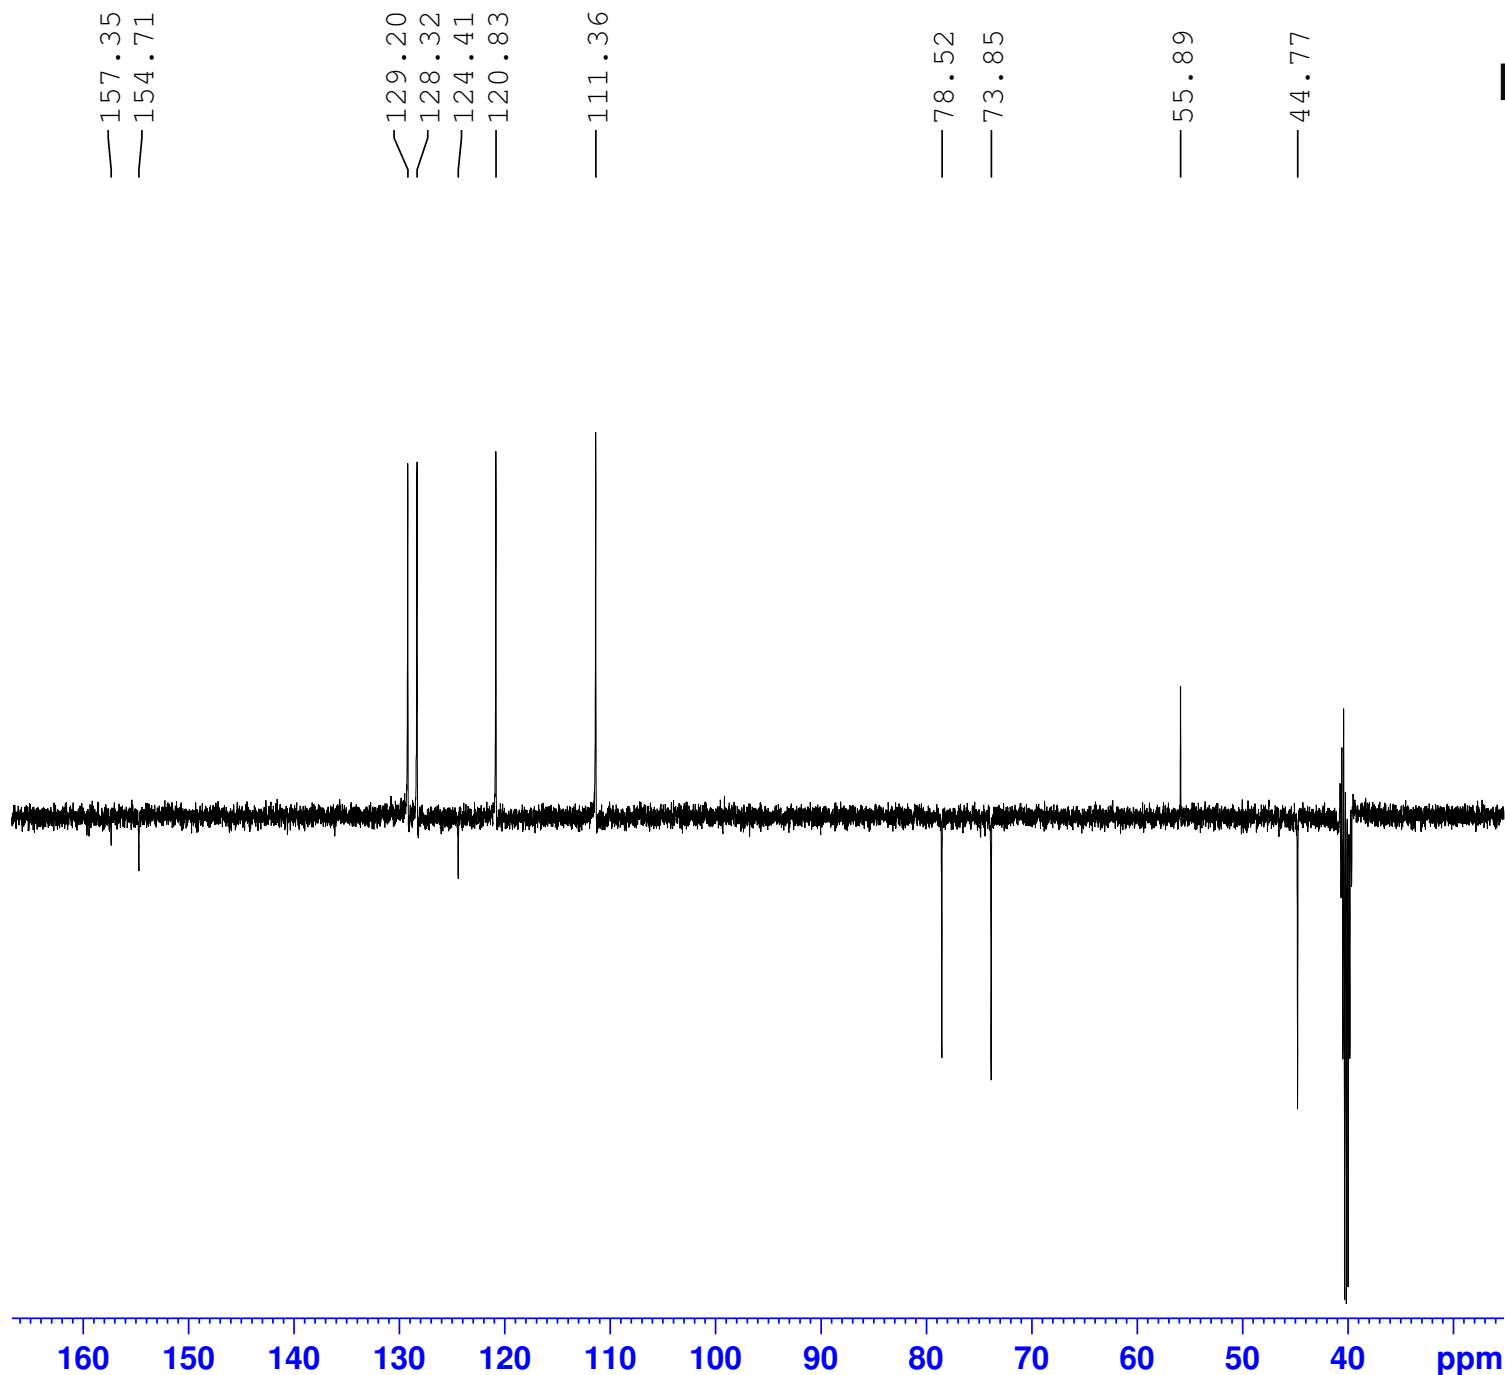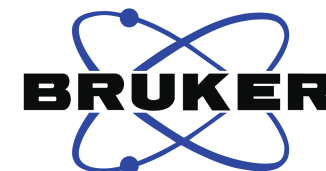

Current Data Parameters  
 NAME 22  
 EXPNO 2  
 PROCNO 1

F2 - Acquisition Parameters  
 Date\_ 20181204  
 Time 13.04 h  
 INSTRUM spect  
 PROBHD Z119470\_0187 (  
 PULPROG deptq135  
 TD 65536  
 SOLVENT DMSO  
 NS 633  
 DS 8  
 SWH 29761.904 Hz  
 FIDRES 0.908261 Hz  
 AQ 1.1010048 sec  
 RG 192.72  
 DW 16.800 usec  
 DE 6.50 usec  
 TE 323.1 K  
 CNST2 145.0000000  
 D1 2.00000000 sec  
 D2 0.00344828 sec  
 D12 0.00002000 sec  
 TD0 1  
 SFO1 125.7829381 MHz  
 NUC1 13C  
 P1 10.00 usec  
 P2 20.00 usec  
 PLW1 82.09700012 W  
 SFO2 500.1820007 MHz  
 NUC2 1H  
 CPDPRG[2] waltz16  
 P0 15.00 usec  
 P3 10.00 usec  
 P4 20.00 usec  
 PCPD2 80.00 usec  
 PLW2 18.10400009 W  
 PLW12 0.28288001 W

F2 - Processing parameters  
 SI 32768  
 SF 125.7703610 MHz  
 WDW EM  
 SSB 0  
 LB 1.00 Hz  
 GB 0  
 PC 1.40

$^{13}\text{C}$  (DEPTQ135) NMR (125 MHz, DMSO- $\text{d}_6$ , 50°C) of **22**

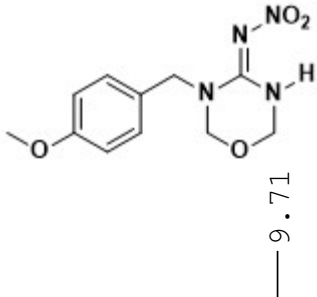

7.272  
7.255  
6.938  
6.921

4.961  
4.957  
4.925  
4.536

— 3.757



Current Data Parameters  
NAME 23  
EXPNO 1  
PROCNO 1

F2 - Acquisition Parameters  
Date\_ 20181204  
Time 11.43 h  
INSTRUM spect  
PROBHD z119470\_0187 (  
PULPROG zg30  
TD 65536  
SOLVENT DMSO  
NS 16  
DS 2  
SWH 10000.000 Hz  
FIDRES 0.305176 Hz  
AQ 3.2767999 sec  
RG 139.09  
DW 50.000 usec  
DE 6.50 usec  
TE 323.1 K  
D1 1.00000000 sec  
TD0 1  
SFO1 500.1830886 MHz  
NUC1 1H  
P0 3.33 usec  
P1 10.00 usec  
PLW1 18.10400009 W

F2 - Processing parameters  
SI 65536  
SF 500.1800000 MHz  
WDW EM  
SSB 0  
LB 0.30 Hz  
GB 0  
PC 1.00

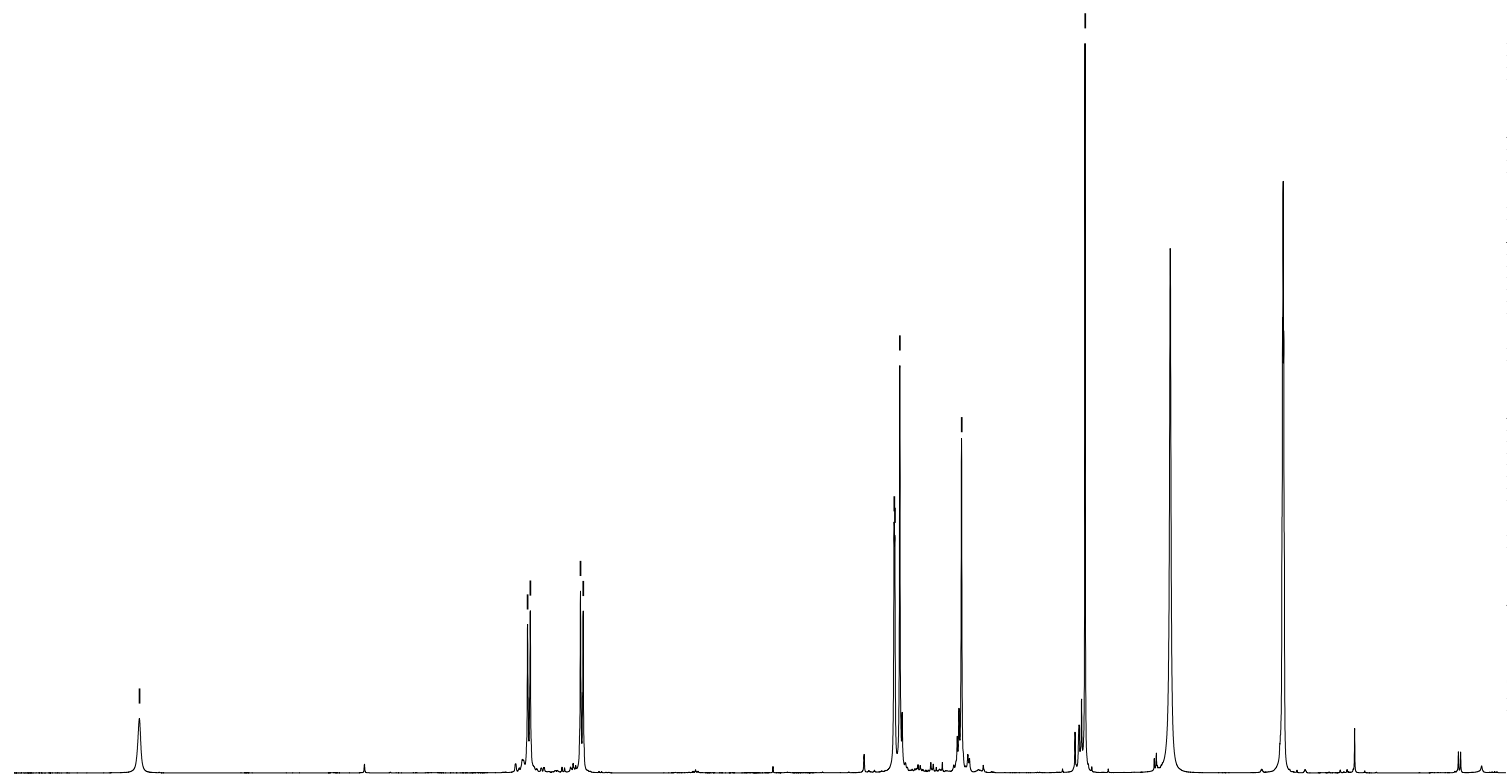

10 9 8 7 6 5 4 3 2 ppm

1.10

2.04

2.00

4.79

2.28

3.07

<sup>1</sup>H NMR (500 MHz, DMSO-d<sub>6</sub>, 50°C) of **23**

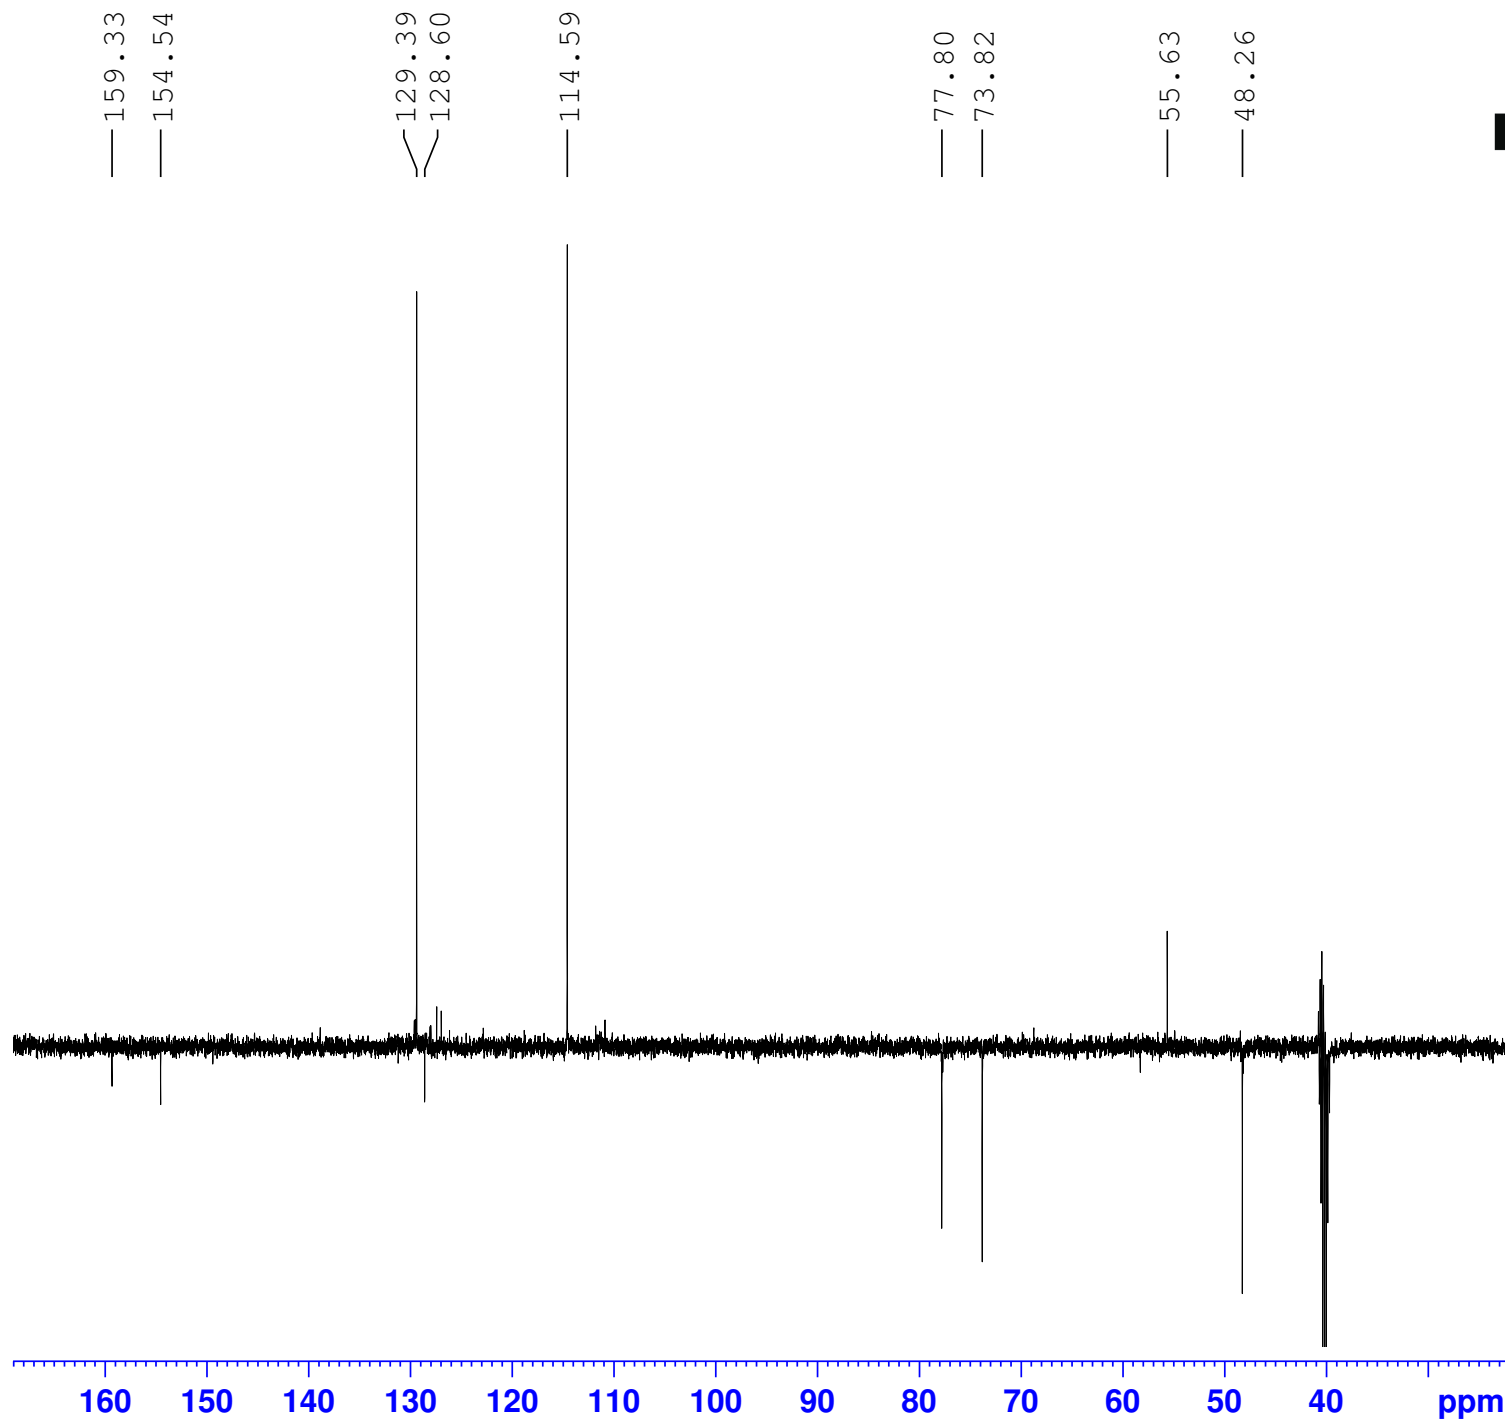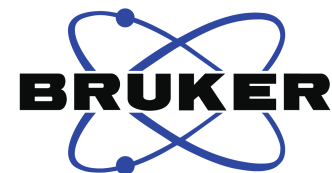

Current Data Parameters  
 NAME 23  
 EXPNO 2  
 PROCNO 1

F2 - Acquisition Parameters  
 Date\_ 20181204  
 Time 11.49 h  
 INSTRUM spect  
 PROBHD z119470\_0187 (  
 PULPROG deptq135  
 TD 65536  
 SOLVENT DMSO  
 NS 104  
 DS 8  
 SWH 29761.904 Hz  
 FIDRES 0.908261 Hz  
 AQ 1.1010048 sec  
 RG 192.72  
 DW 16.800 usec  
 DE 6.50 usec  
 TE 323.2 K  
 CNST2 145.000000  
 D1 2.00000000 sec  
 D2 0.00344828 sec  
 D12 0.00002000 sec  
 TD0 1  
 SFO1 125.7829381 MHz  
 NUC1 13C  
 P1 10.00 usec  
 P2 20.00 usec  
 PLW1 82.09700012 W  
 SFO2 500.1820007 MHz  
 NUC2 1H  
 CPDPRG[2] waltz16  
 P0 15.00 usec  
 P3 10.00 usec  
 P4 20.00 usec  
 PCPD2 80.00 usec  
 PLW2 18.10400009 W  
 PLW12 0.28288001 W

F2 - Processing parameters  
 SI 32768  
 SF 125.7703610 MHz  
 WDW EM  
 SSB 0  
 LB 1.00 Hz  
 GB 0  
 PC 1.40

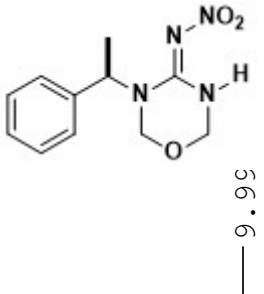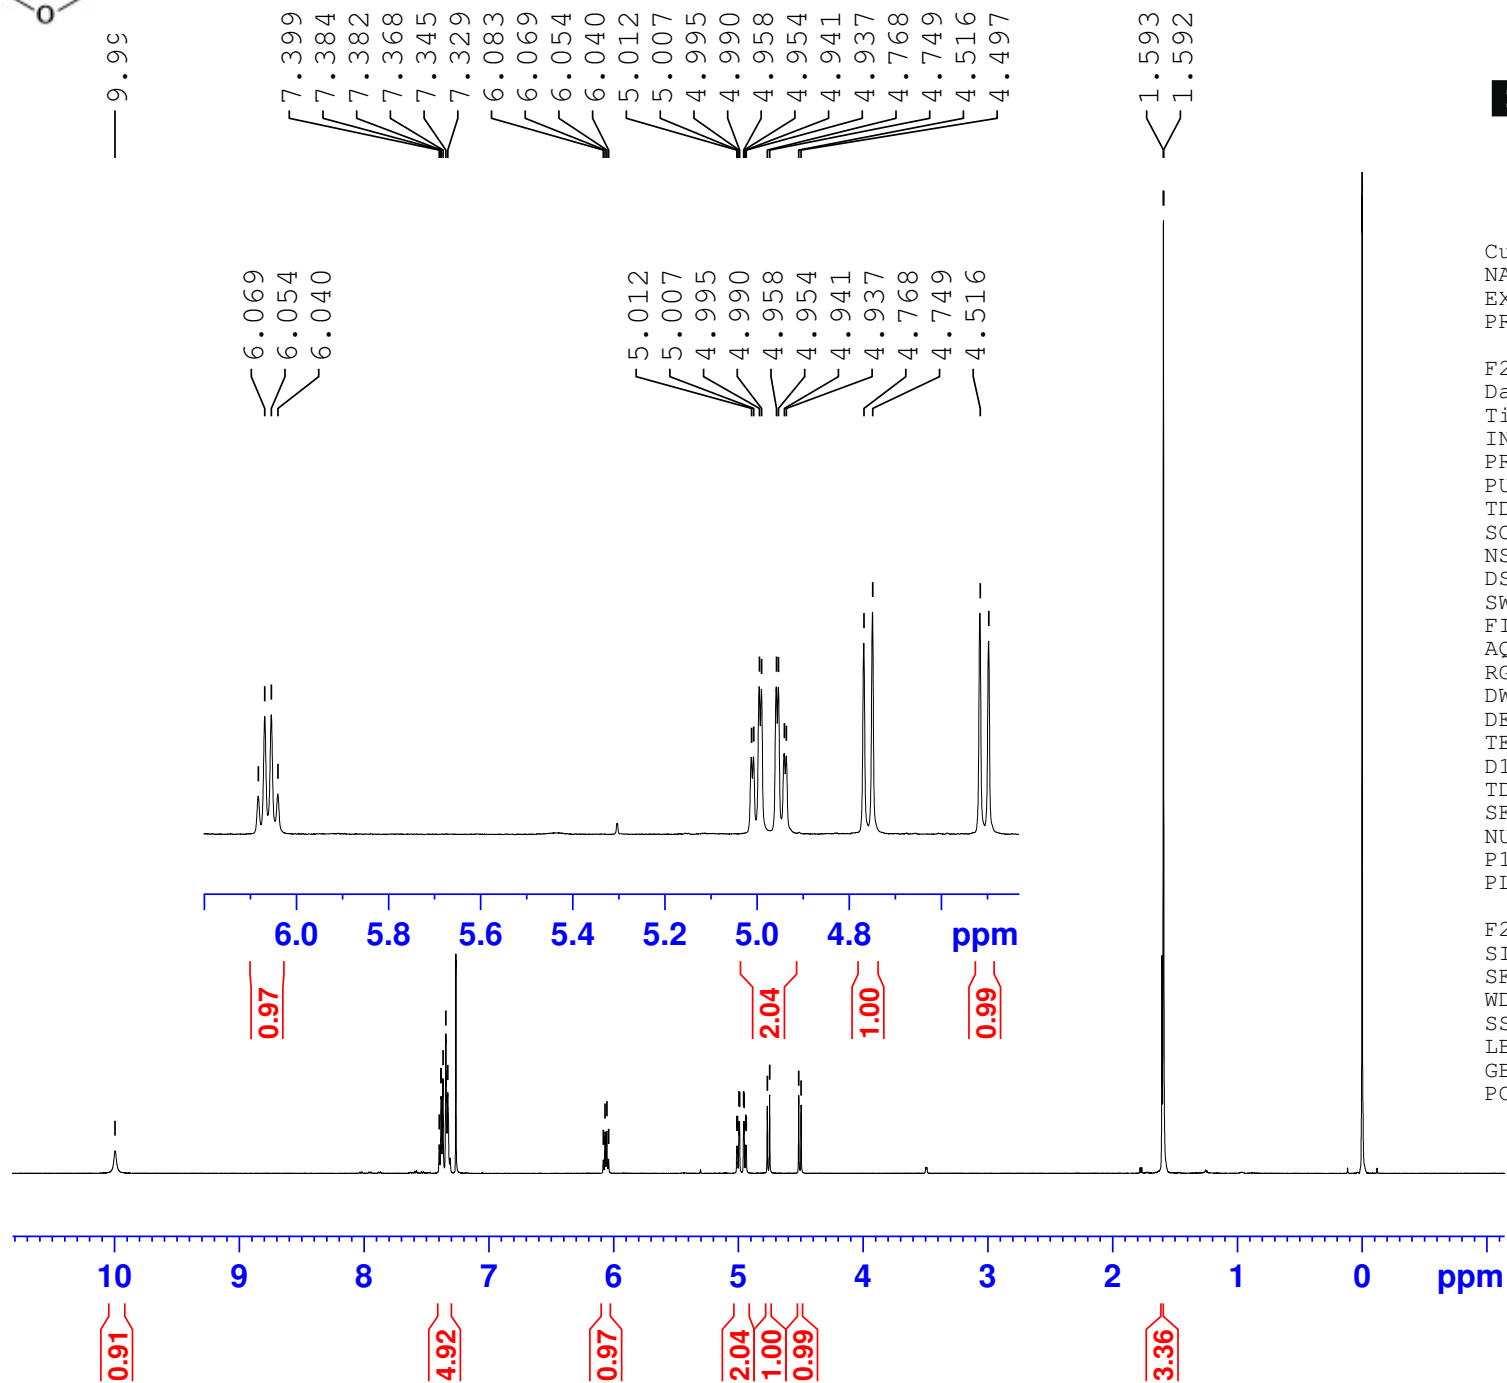

Current Data Parameters  
 NAME 1  
 EXPNO 1  
 PROCNO 1

F2 - Acquisition Parameters  
 Date\_ 20170826  
 Time 8.08 h  
 INSTRUM spect  
 PROBHD z119470\_0187 (  
 PULPROG zg30  
 TD 65536  
 SOLVENT CDCl3  
 NS 16  
 DS 2  
 SWH 10000.000 Hz  
 FIDRES 0.305176 Hz  
 AQ 3.2767999 sec  
 RG 192.72  
 DW 50.000 usec  
 DE 6.50 usec  
 TE 291.9 K  
 D1 1.00000000 sec  
 TD0 1  
 SFO1 500.1830886 MHz  
 NUC1 1H  
 P1 10.00 usec  
 PLW1 18.10400009 W

F2 - Processing parameters  
 SI 65536  
 SF 500.1800100 MHz  
 WDW EM  
 SSB 0  
 LB 0.30 Hz  
 GB 0  
 PC 1.00

<sup>1</sup>H NMR (500 MHz, CDCl<sub>3</sub>) of **R-24**

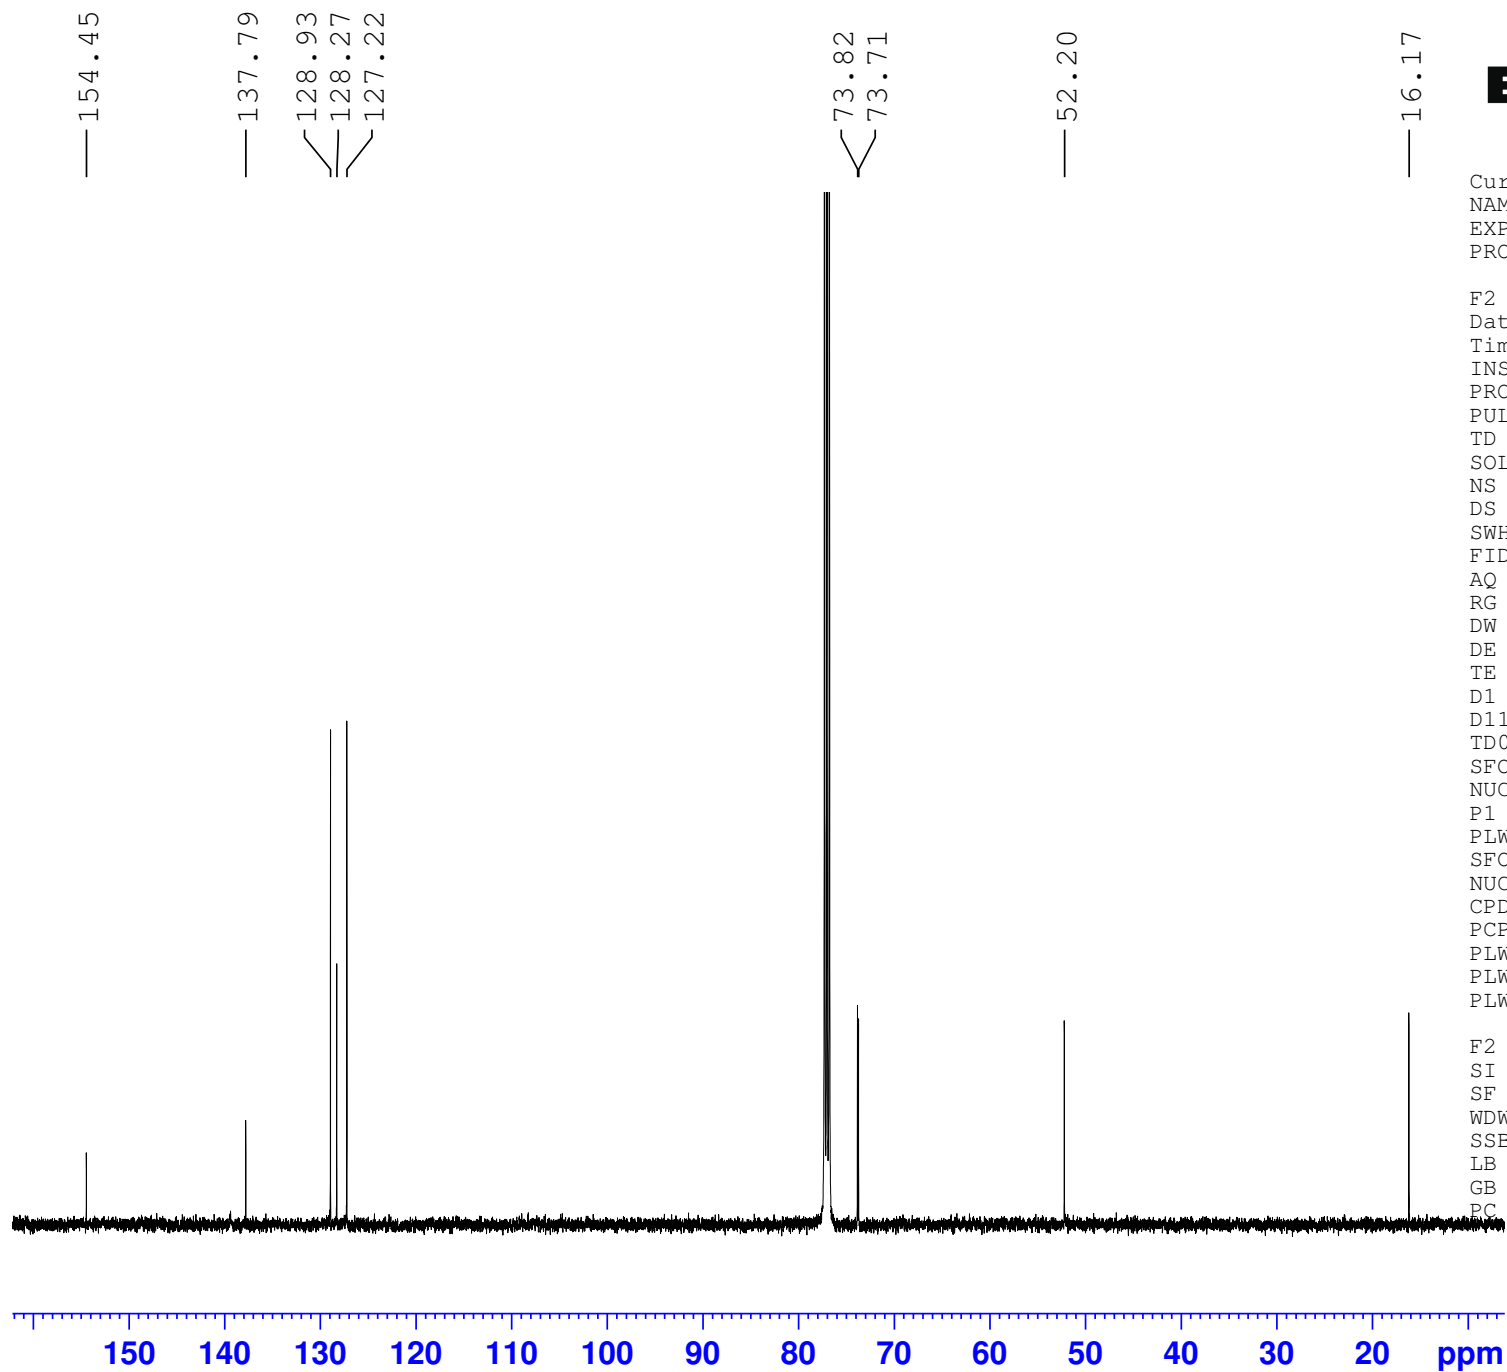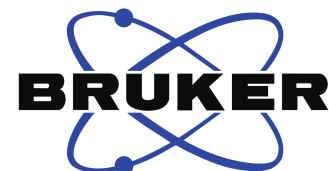

Current Data Parameters  
 NAME 13C  
 EXPNO 1  
 PROCNO 1

F2 - Acquisition Parameters  
 Date\_ 20170826  
 Time 8.05 h  
 INSTRUM spect  
 PROBHD Z119470\_0187 (  
 PULPROG zgpg30  
 TD 65536  
 SOLVENT CDCl3  
 NS 5120  
 DS 4  
 SWH 29761.904 Hz  
 FIDRES 0.908261 Hz  
 AQ 1.1010048 sec  
 RG 192.72  
 DW 16.800 usec  
 DE 6.50 usec  
 TE 292.6 K  
 D1 2.00000000 sec  
 D11 0.03000000 sec  
 TD0 1  
 SFO1 125.7829381 MHz  
 NUC1 13C  
 P1 10.00 usec  
 PLW1 82.09700012 W  
 SFO2 500.1820007 MHz  
 NUC2 1H  
 CPDPRG[2] waltz16  
 PCPD2 80.00 usec  
 PLW2 18.10400009 W  
 PLW12 0.28680280 W  
 PLW13 0.14374560 W

F2 - Processing parameters  
 SI 32768  
 SF 125.7703636 MHz  
 WDW EM  
 SSB 0  
 LB 1.00 Hz  
 GB 0  
 PC 1.40

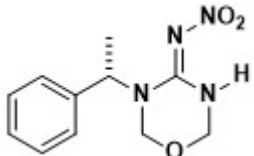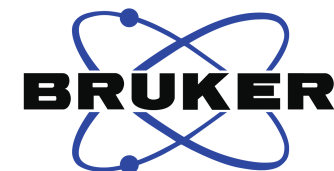

Current Data Parameters  
 NAME S-25  
 EXPNO 1  
 PROCNO 1

F2 - Acquisition Parameters  
 Date\_ 20170622  
 Time 10.51 h  
 INSTRUM spect  
 PROBHD Z119470\_0187 (  
 PULPROG zg30  
 TD 65536  
 SOLVENT CDCl3  
 NS 16  
 DS 2  
 SWH 10000.000 Hz  
 FIDRES 0.305176 Hz  
 AQ 3.2767999 sec  
 RG 95.16  
 DW 50.000 usec  
 DE 6.50 usec  
 TE 291.3 K  
 D1 1.00000000 sec  
 TD0 1  
 SFO1 500.1830886 MHz  
 NUC1 1H  
 P1 10.00 usec  
 PLW1 18.10400009 W

F2 - Processing parameters  
 SI 65536  
 SF 500.180074 MHz  
 WDW EM  
 SSB 0  
 LB 0.30 Hz  
 GB 0  
 PC 1.00

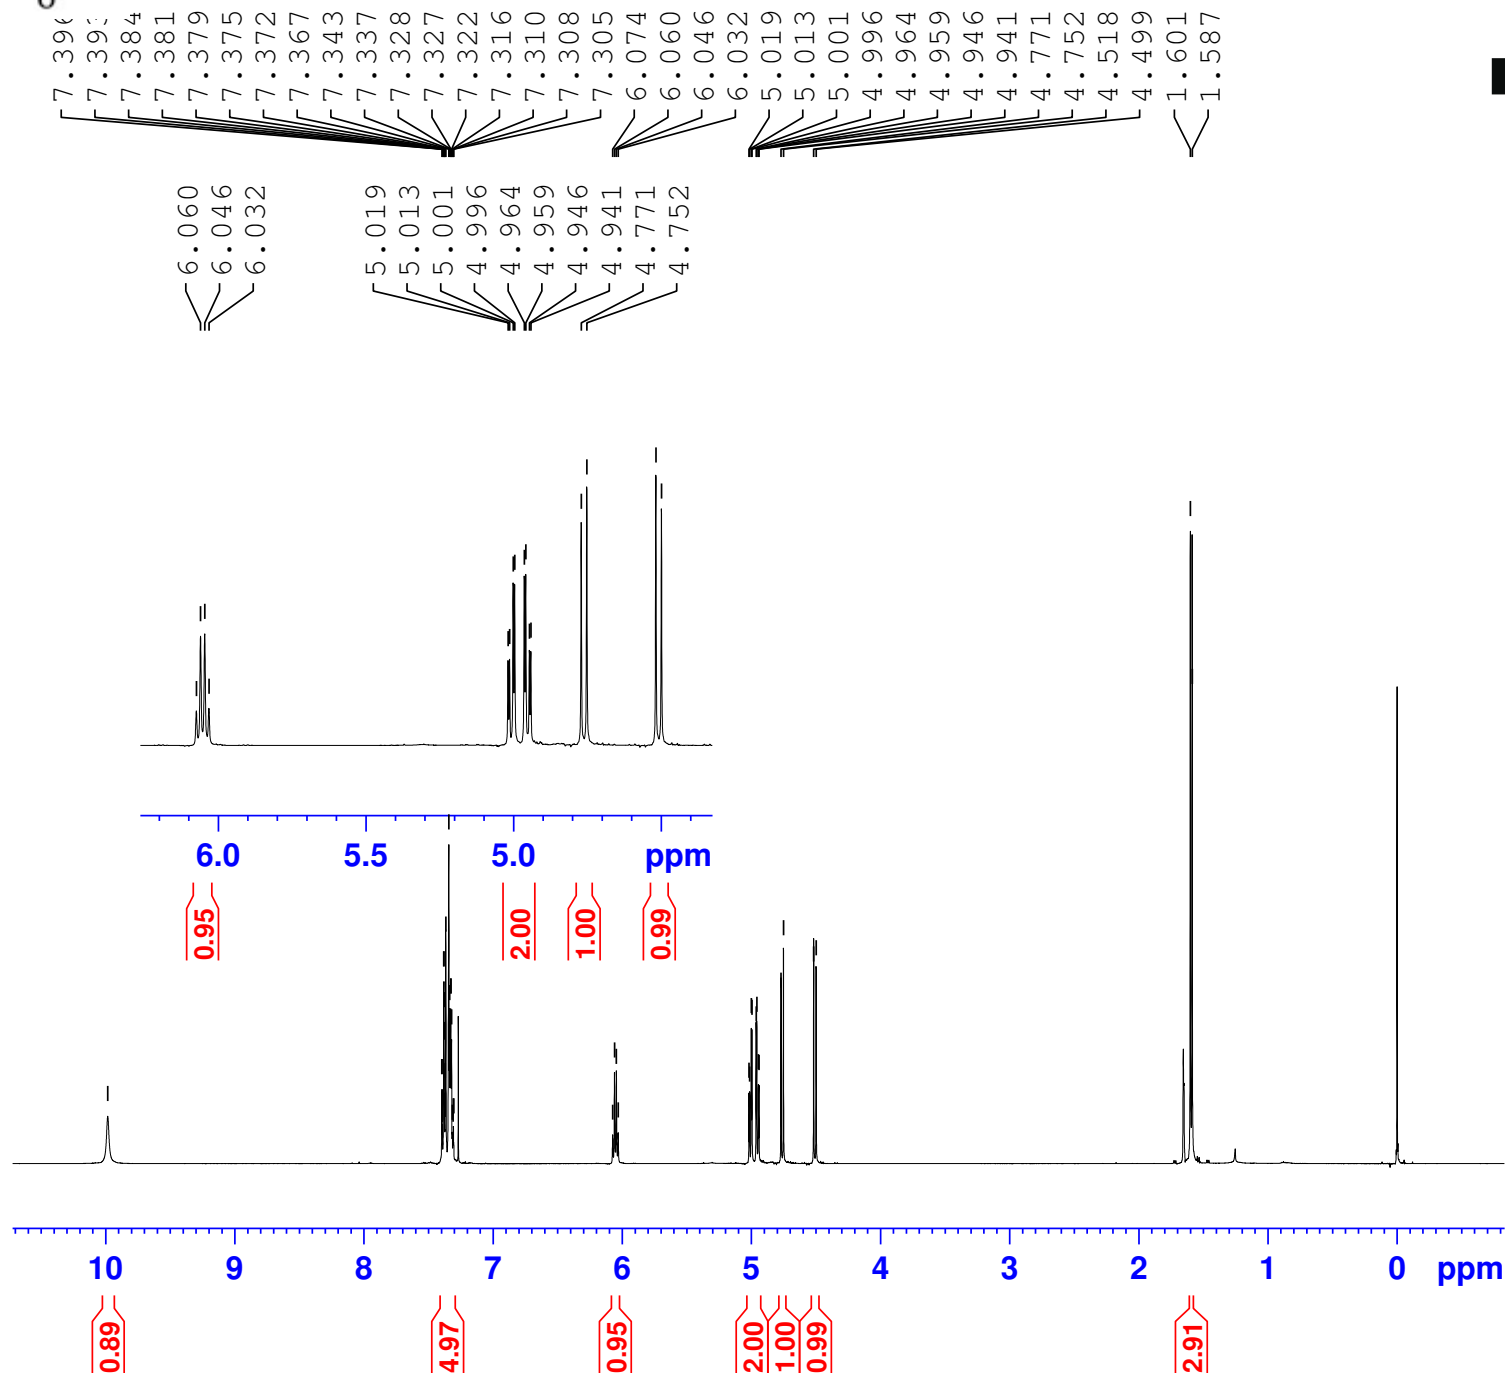

<sup>1</sup>H NMR (500 MHz, CDCl<sub>3</sub>) of S-25

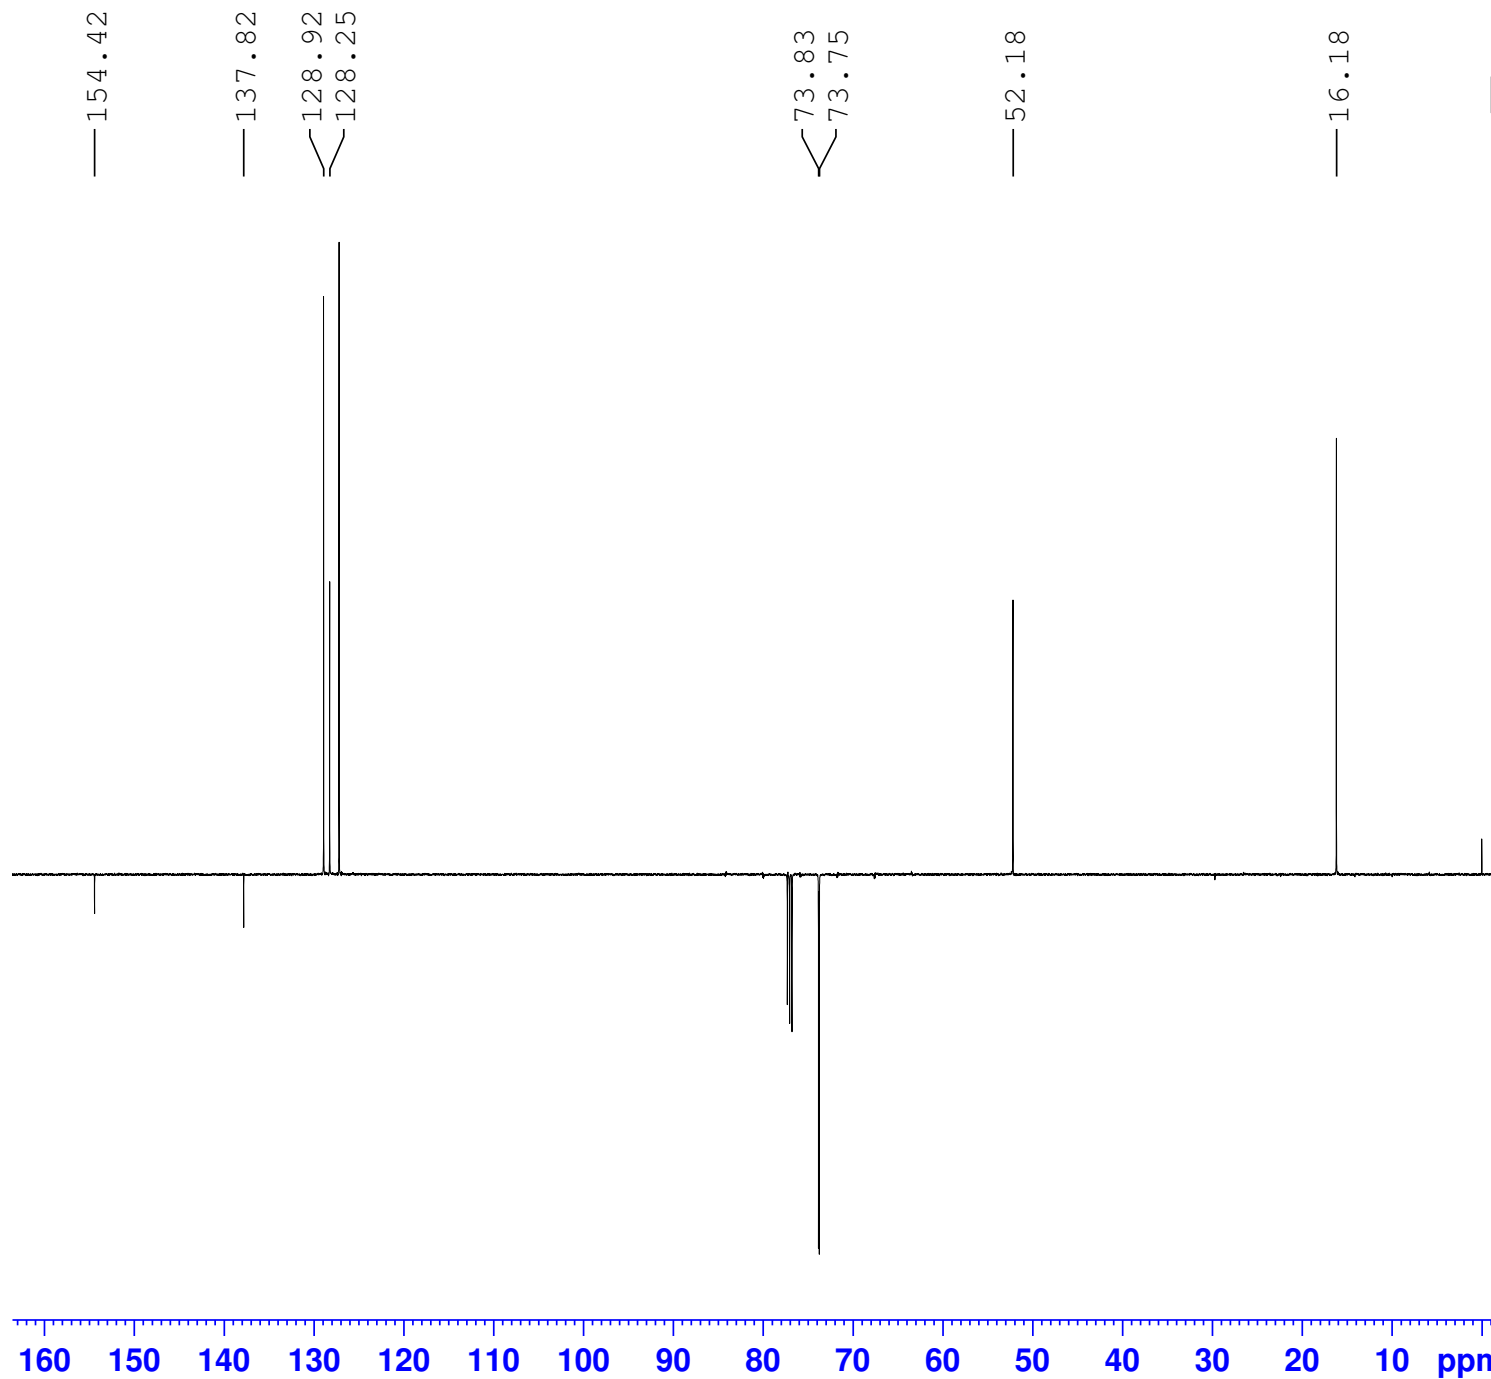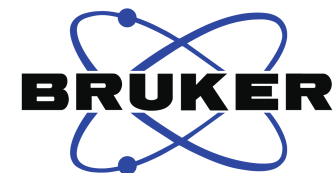

Current Data Parameters  
NAME S-25  
EXPNO 2  
PROCNO 1

F2 - Acquisition Parameters  
Date\_ 20170622  
Time 14.35 h  
INSTRUM spect  
PROBHD z119470\_0187 (  
PULPROG deptq135  
TD 65536  
SOLVENT CDCl3  
NS 4097  
DS 8  
SWH 29761.904 Hz  
FIDRES 0.908261 Hz  
AQ 1.1010048 sec  
RG 192.72  
DW 16.800 usec  
DE 6.50 usec  
TE 291.7 K  
CNST2 145.0000000  
D1 2.00000000 sec  
D2 0.00344828 sec  
D12 0.00002000 sec  
TD0 1  
SFO1 125.7829381 MHz  
NUC1 13C  
P1 10.00 usec  
P2 20.00 usec  
PLW1 82.09700012 W  
SFO2 500.1820007 MHz  
NUC2 1H  
CPDPRG[2] waltz16  
P0 15.00 usec  
P3 10.00 usec  
P4 20.00 usec  
PCPD2 80.00 usec  
PLW2 18.10400009 W  
PLW12 0.28680280 W

F2 - Processing parameters  
SI 32768  
SF 125.7703641 MHz  
WDW EM  
SSB 0  
LB 1.00 Hz  
GB 0  
PC 1.40

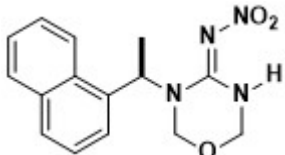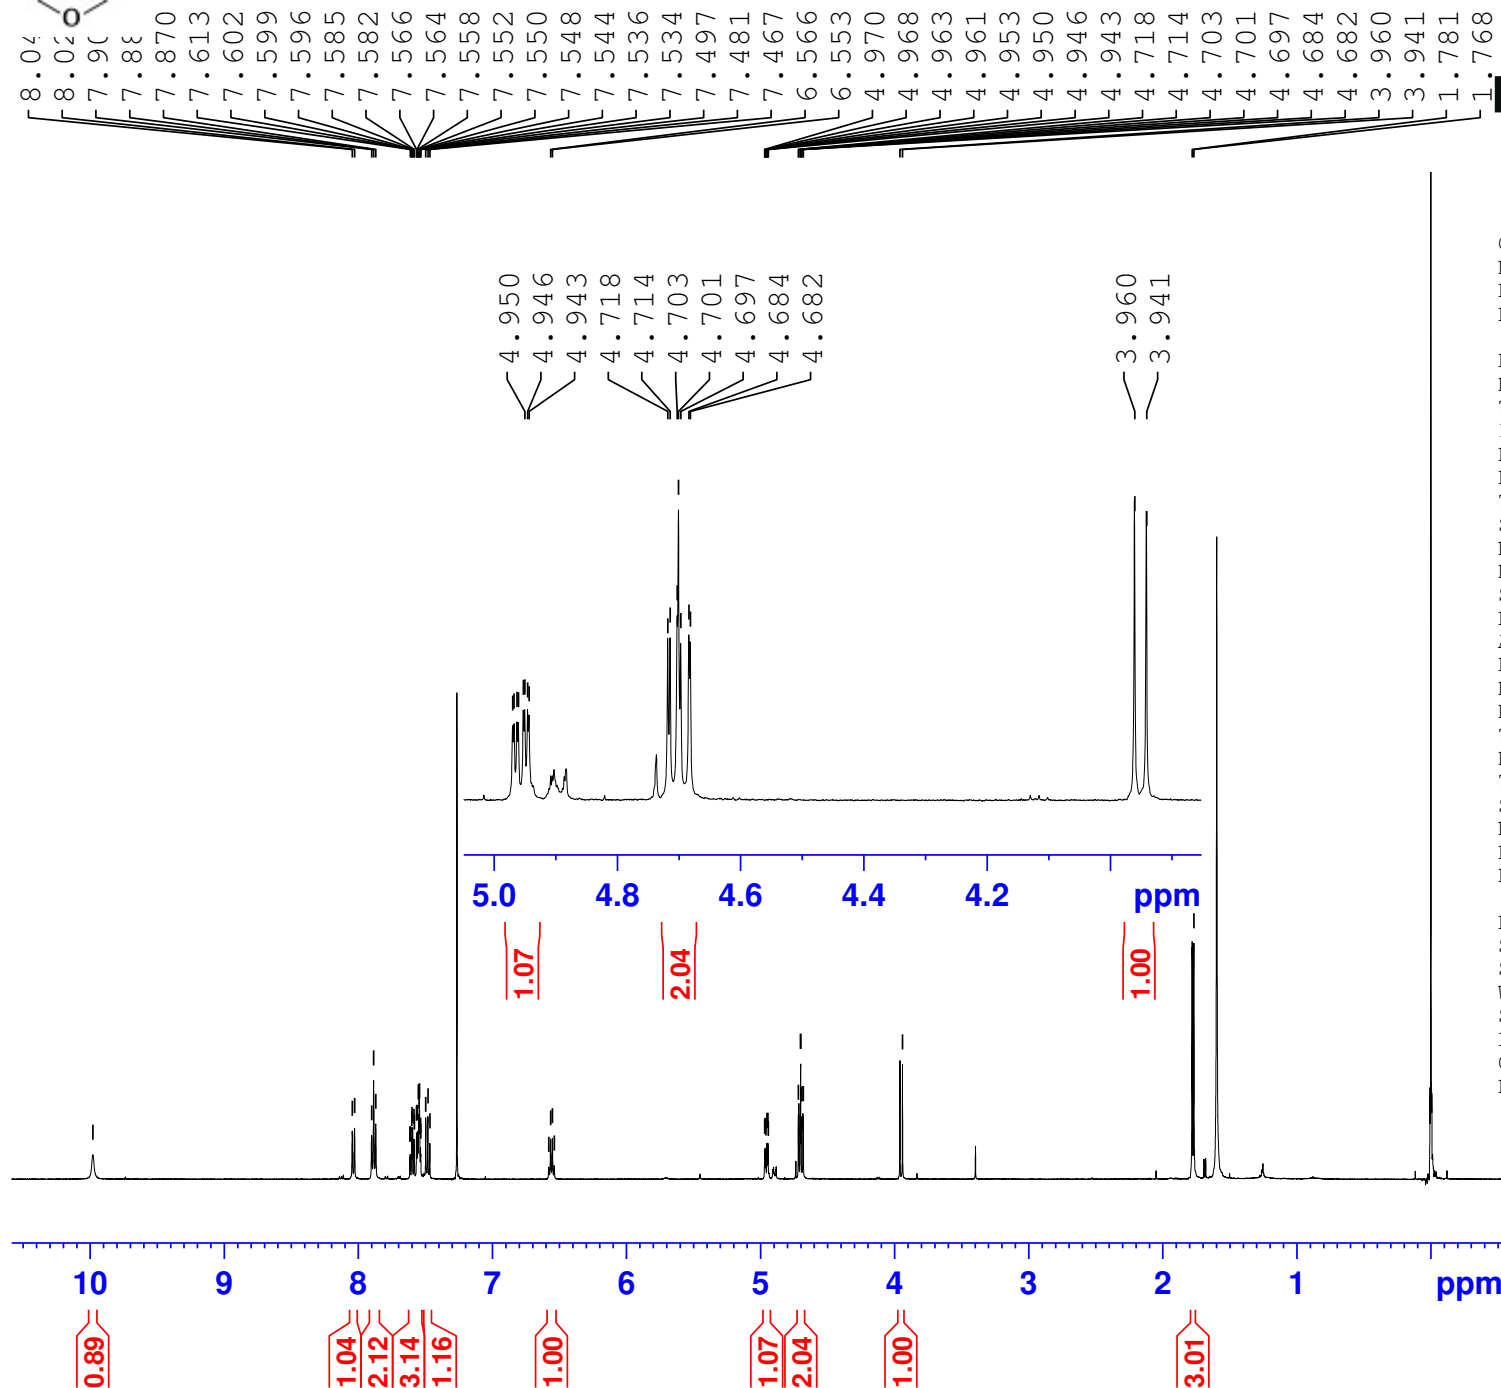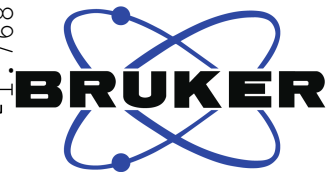

Current Data Parameters  
 NAME R-26  
 EXPNO 1  
 PROCNO 1

F2 - Acquisition Parameters  
 Date\_ 20170825  
 Time 13.02 h  
 INSTRUM spect  
 PROBHD Z119470\_0187 (   
 PULPROG zg30  
 TD 65536  
 SOLVENT CDCl3  
 NS 8  
 DS 0  
 SWH 10000.000 Hz  
 FIDRES 0.305176 Hz  
 AQ 3.2767999 sec  
 RG 139.09  
 DW 50.000 usec  
 DE 6.50 usec  
 TE 291.2 K  
 D1 1.00000000 sec  
 TD0 1  
 SFO1 500.1830886 MHz  
 NUC1 1H  
 P1 10.00 usec  
 PLW1 18.10400009 W

F2 - Processing parameters  
 SI 65536  
 SF 500.1800098 MHz  
 WDW EM  
 SSB 0  
 LB 0.30 Hz  
 GB 0  
 PC 1.00

<sup>1</sup>H NMR (500 MHz, CDCl<sub>3</sub>) of **R-26**



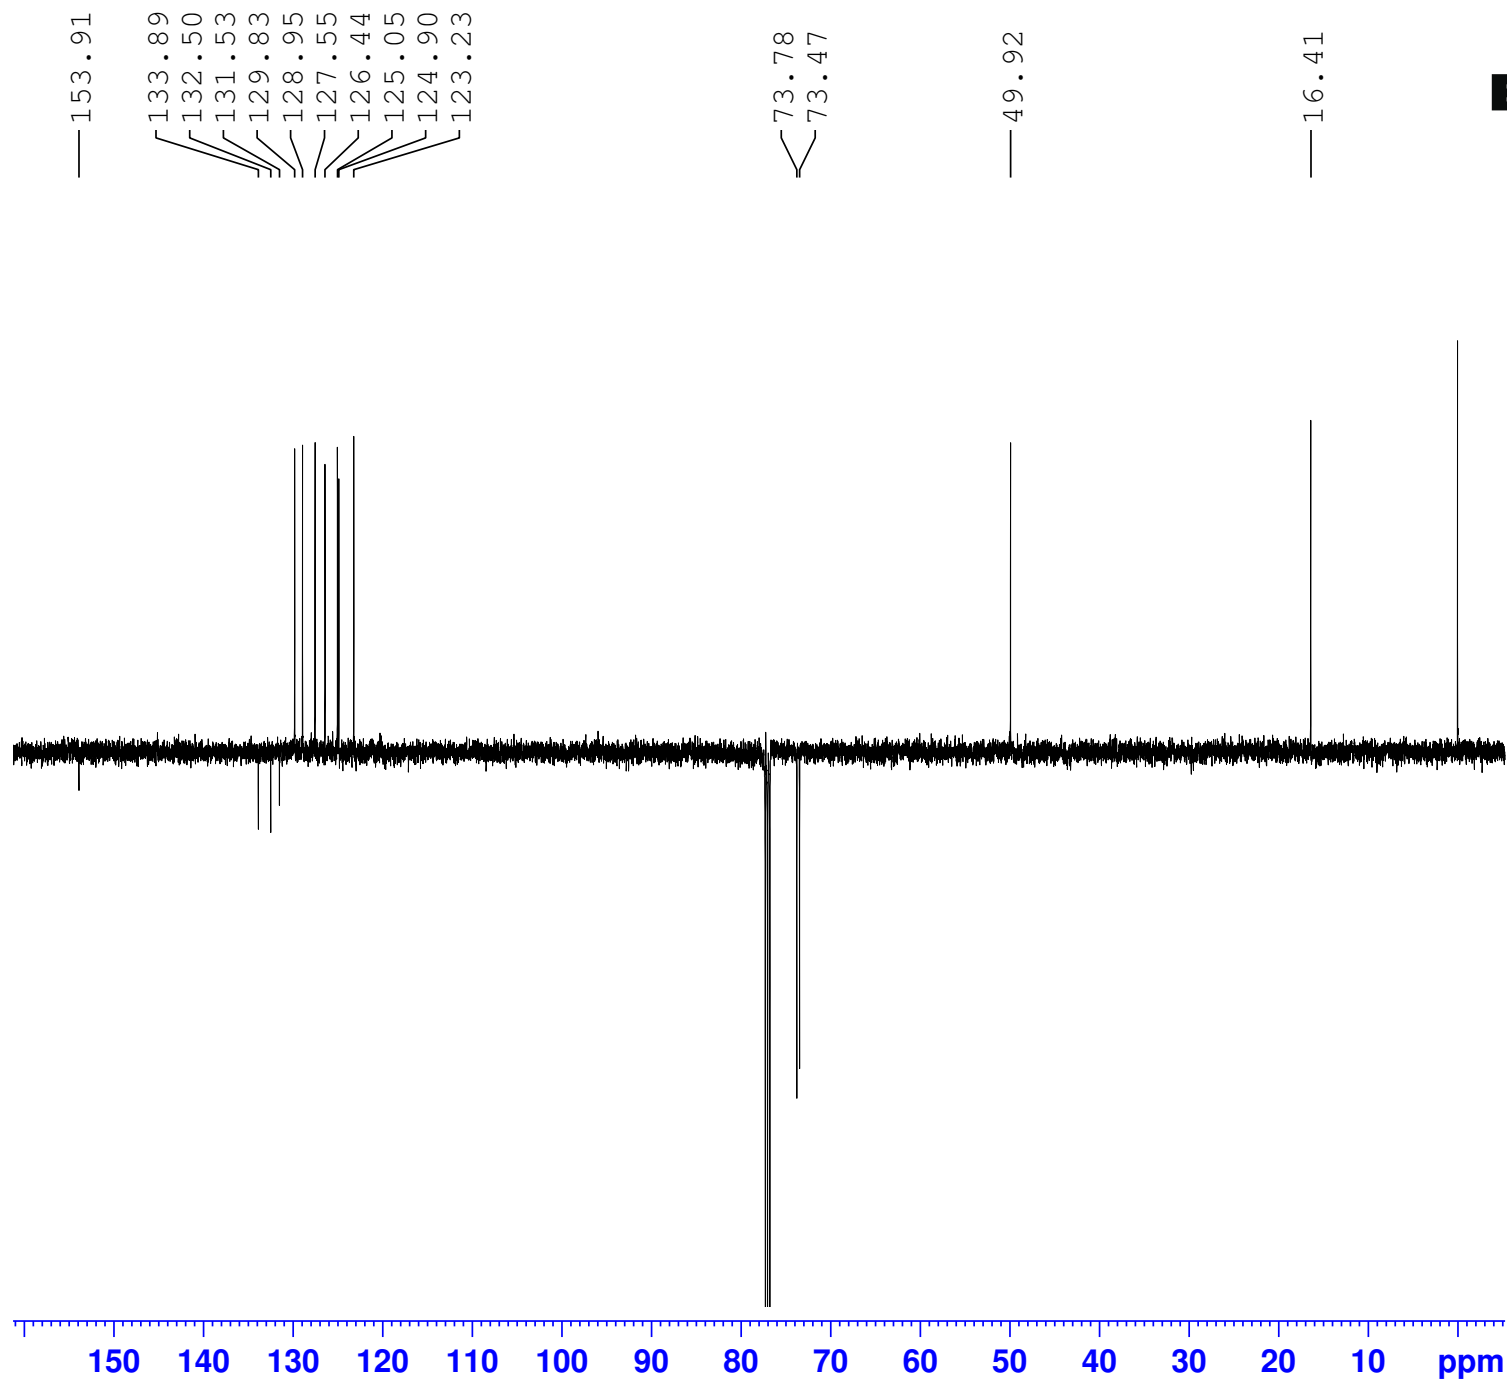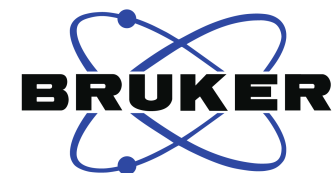

Current Data Parameters  
 NAME R-26  
 EXPNO 2  
 PROCNO 1

F2 - Acquisition Parameters  
 Date\_ 20170825  
 Time 14.23 h  
 INSTRUM spect  
 PROBHD Z119470\_0187 (  
 PULPROG deptq135  
 TD 65536  
 SOLVENT CDCl3  
 NS 1479  
 DS 8  
 SWH 29761.904 Hz  
 FIDRES 0.908261 Hz  
 AQ 1.1010048 sec  
 RG 192.72  
 DW 16.800 usec  
 DE 6.50 usec  
 TE 291.6 K  
 CNST2 145.000000  
 D1 2.00000000 sec  
 D2 0.00344828 sec  
 D12 0.00002000 sec  
 TD0 1  
 SFO1 125.7829381 MHz  
 NUC1 13C  
 P1 10.00 usec  
 P2 20.00 usec  
 PLW1 82.09700012 W  
 SFO2 500.1820007 MHz  
 NUC2 1H  
 CPDPRG[2] waltz16  
 P0 15.00 usec  
 P3 10.00 usec  
 P4 20.00 usec  
 PCPD2 80.00 usec  
 PLW2 18.10400009 W  
 PLW12 0.28680280 W

F2 - Processing parameters  
 SI 32768  
 SF 125.7703610 MHz  
 WDW EM  
 SSB 0  
 LB 1.00 Hz  
 GB 0  
 PC 52 1.40

$^{13}\text{C}$  (DEPTQ135) NMR (125 MHz,  $\text{CDCl}_3$ ) of **R-26**

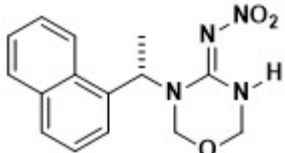

9.98  
8.04  
8.03  
7.90  
7.886  
7.870  
7.615  
7.613  
7.602  
7.599  
7.596  
7.585  
7.582  
7.566  
7.564  
7.558  
7.550  
7.547  
7.544  
7.536  
7.534  
7.497  
7.481  
7.466  
6.568  
6.554  
4.969  
4.967  
4.962  
4.960  
4.952  
4.950  
4.945  
4.943  
4.718  
4.714  
4.701  
4.697  
4.684  
4.682  
3.961  
3.942  
1.782  
1.768

4.960  
4.952  
4.950  
4.945  
4.943  
4.718  
4.714  
4.701  
4.697  
4.684  
4.682

3.961  
3.942

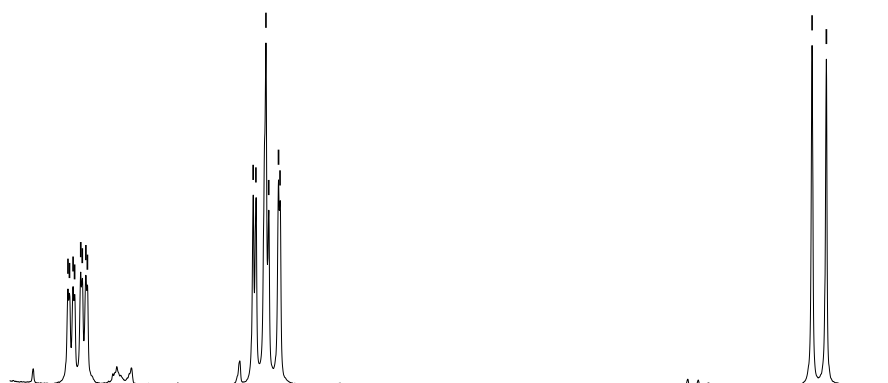

5.0 4.9 4.8 4.7 4.6 4.5 4.4 4.3 4.2 4.1 4.0 ppm

1.06

2.04

1.01

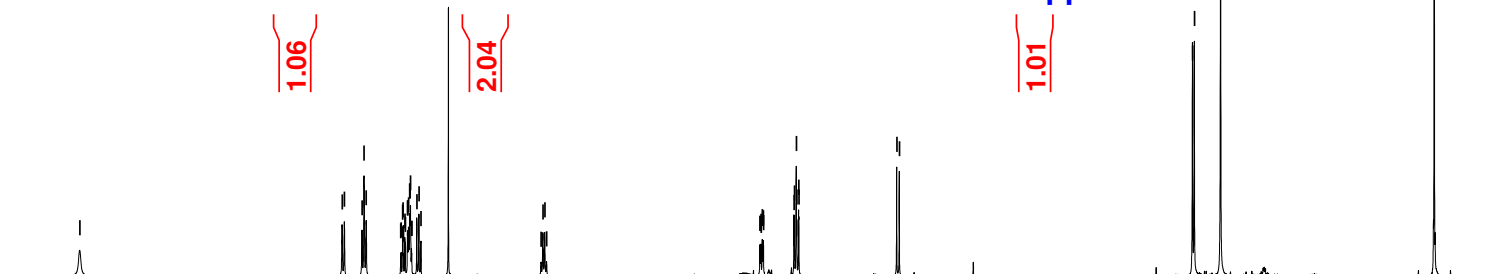

10 9 8 7 6 5 4 3 2 1 ppm

0.86

1.00

1.95

0.98

2.01

1.01

1.00

1.06

2.04

1.01

3.00

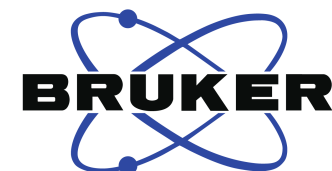

Current Data Parameters  
NAME 1H  
EXPNO 1  
PROCNO 1

F2 - Acquisition Parameters  
Date\_ 20170826  
Time 20.01 h  
INSTRUM spect  
PROBHD Z119470\_0187 (  
PULPROG zg30  
TD 65536  
SOLVENT CDCl3  
NS 16  
DS 2  
SWH 10000.000 Hz  
FIDRES 0.305176 Hz  
AQ 3.2767999 sec  
RG 192.72  
DW 50.000 usec  
DE 6.50 usec  
TE 292.1 K  
D1 1.00000000 sec  
TD0 1  
SFO1 500.1830886 MHz  
NUC1 1H  
P1 10.00 usec  
PLW1 18.10400009 W

F2 - Processing parameters  
SI 65536  
SF 500.1800101 MHz  
WDW EM  
SSB 0  
LB 0.30 Hz  
GB 0  
PC 1.00

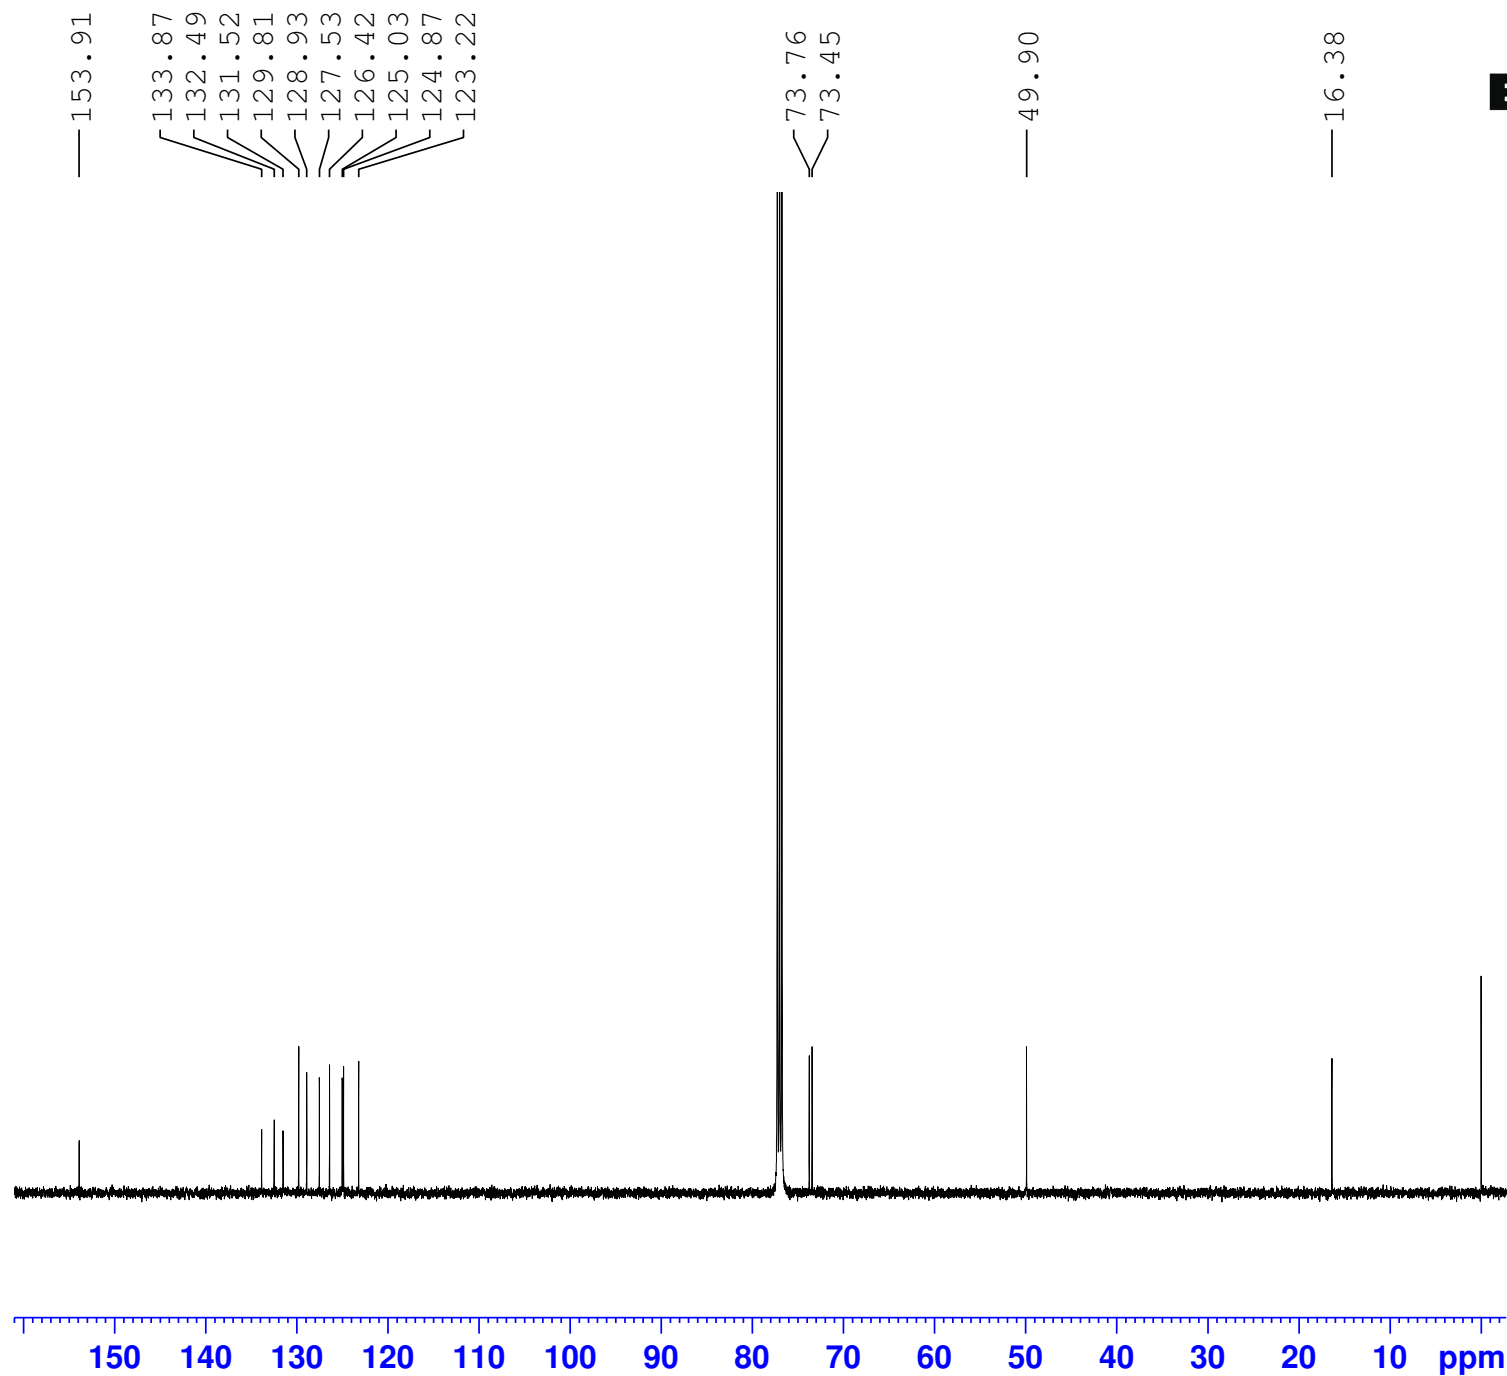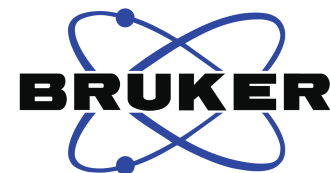

Current Data Parameters  
NAME 13C  
EXPNO 1  
PROCNO 1

F2 - Acquisition Parameters  
Date\_ 20170826  
Time 19.59 h  
INSTRUM spect  
PROBHD Z119470\_0187 (  
PULPROG zgpg30  
TD 65536  
SOLVENT CDCl3  
NS 5120  
DS 4  
SWH 29761.904 Hz  
FIDRES 0.908261 Hz  
AQ 1.1010048 sec  
RG 192.72  
DW 16.800 usec  
DE 6.50 usec  
TE 292.8 K  
D1 2.00000000 sec  
D11 0.03000000 sec  
TD0 1  
SFO1 125.7829381 MHz  
NUC1 13C  
P1 10.00 usec  
PLW1 82.09700012 W  
SFO2 500.1820007 MHz  
NUC2 1H  
CPDPRG[2] waltz16  
PCPD2 80.00 usec  
PLW2 18.10400009 W  
PLW12 0.28680280 W  
PLW13 0.14374560 W

F2 - Processing parameters  
SI 32768  
SF 125.7703632 MHz  
WDW EM  
SSB 0  
LB 1.00 Hz  
GB 0  
PC 1.40

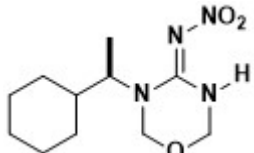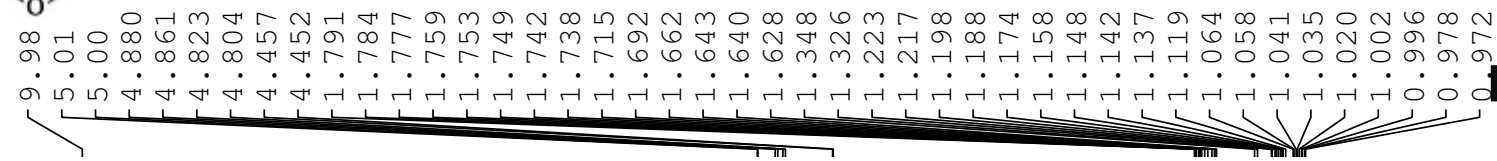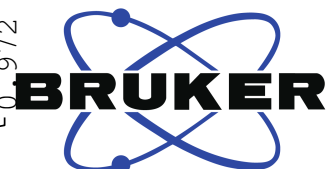

Current Data Parameters  
 NAME 1H  
 EXPNO 1  
 PROCNO 1

F2 - Acquisition Parameters  
 Date\_ 20181101  
 Time 11.56 h  
 INSTRUM spect  
 PROBHD z119470\_0187 (  
 PULPROG zg30  
 TD 65536  
 SOLVENT CDCl3  
 NS 5  
 DS 1  
 SWH 10000.000 Hz  
 FIDRES 0.305176 Hz  
 AQ 3.276799 sec  
 RG 95.16  
 DW 50.000 usec  
 DE 6.50 usec  
 TE 292.1 K  
 D1 1.00000000 sec  
 TD0 1  
 SFO1 500.1830886 MHz  
 NUC1 1H  
 P0 3.33 usec  
 P1 10.00 usec  
 PLW1 18.10400009 W

F2 - Processing parameters  
 SI 65536  
 SF 500.1800069 MHz  
 WDW EM  
 SSB 0  
 LB 0.30 Hz  
 GB 0  
 PC 1.00

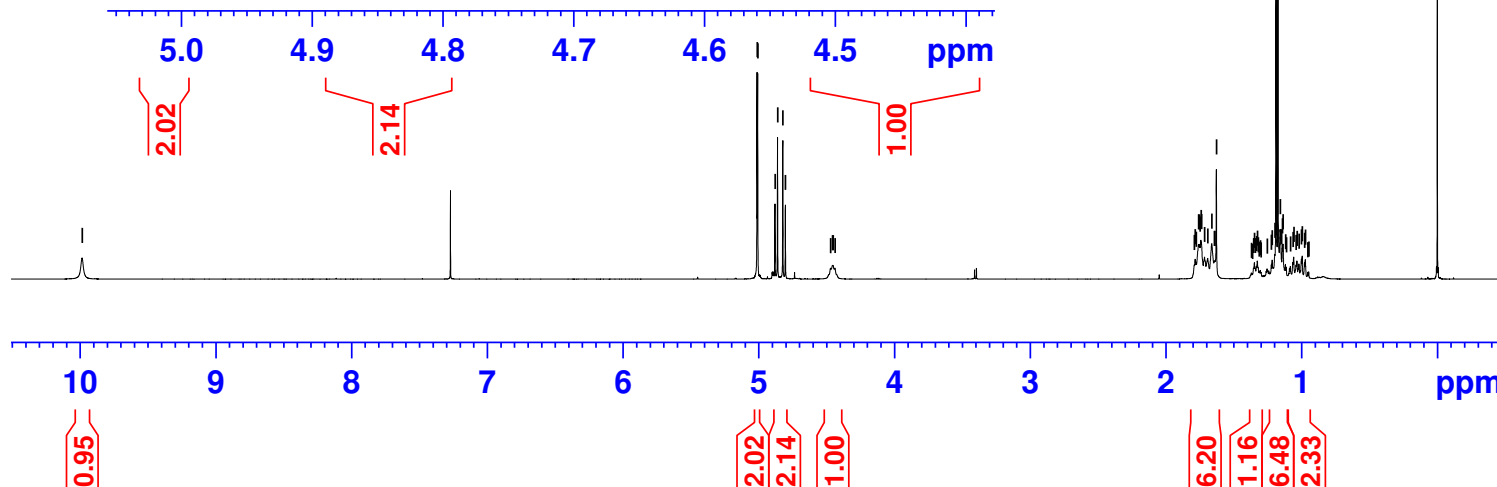

<sup>1</sup>H NMR (500 MHz, CDCl<sub>3</sub>) of **R-28**

—154.91

<73.73  
<73.33

—55.52

—40.84

<29.82

<29.75

<25.94

<25.82

—16.08

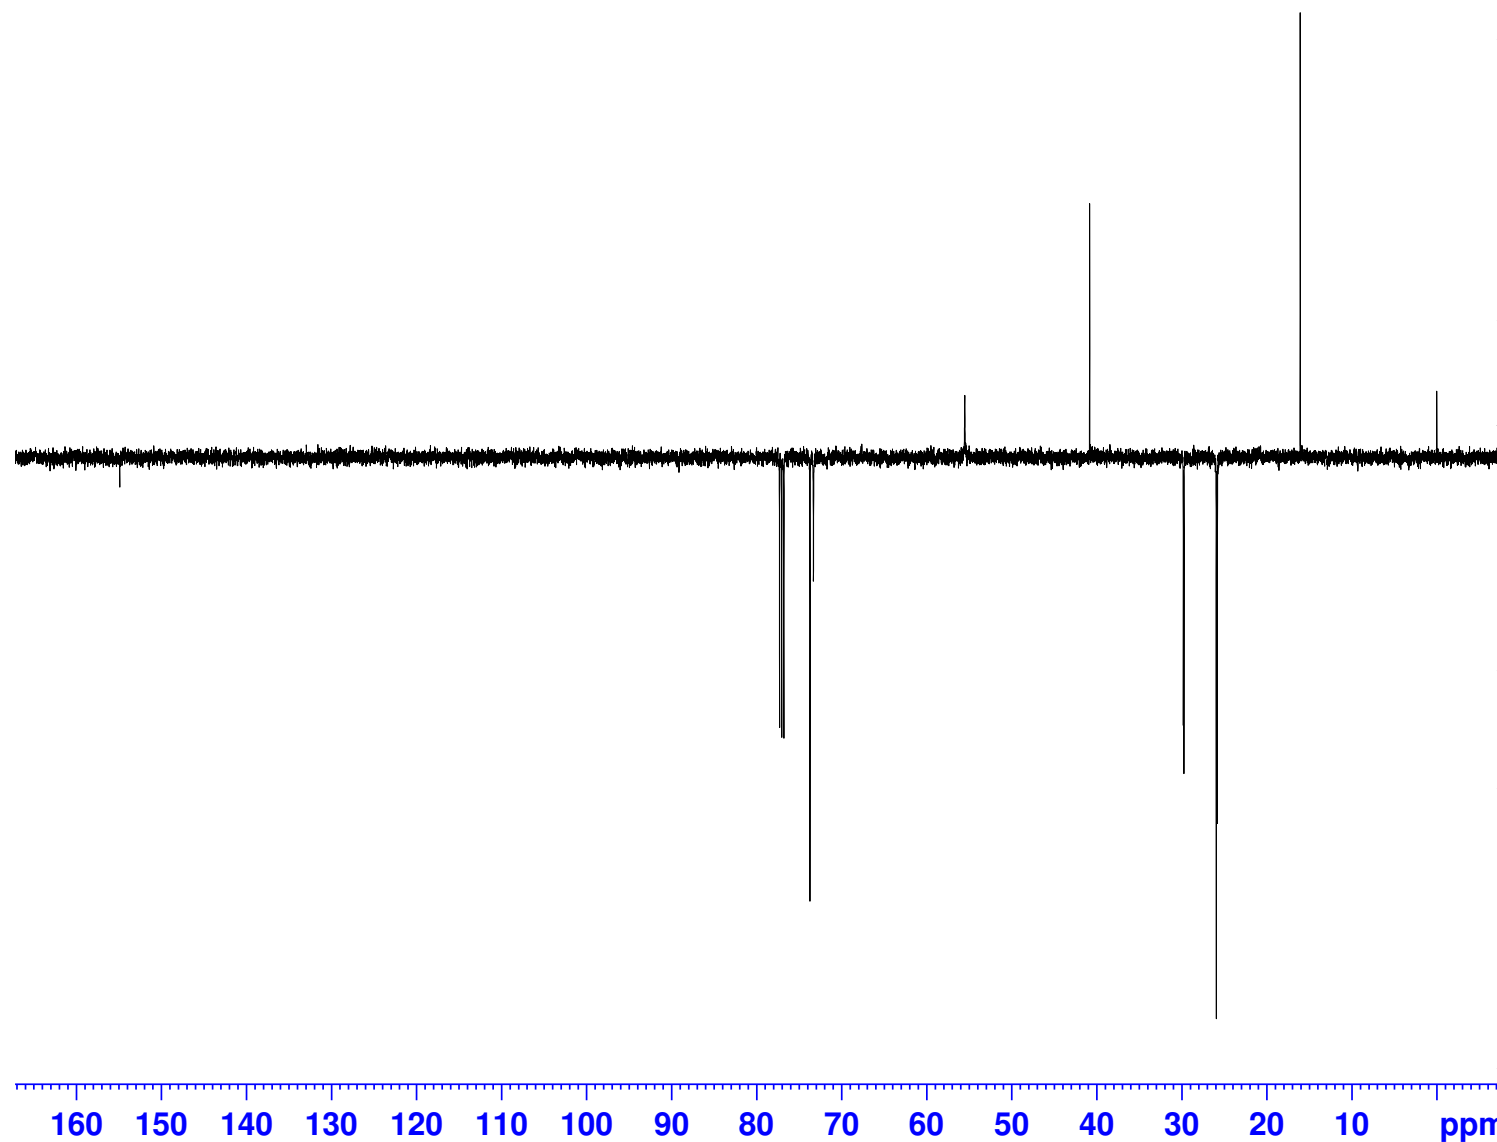

Current Data Parameters  
NAME 13C  
EXPNO 1  
PROCNO 1

F2 - Acquisition Parameters  
Date\_ 20181101  
Time 12.07 h  
INSTRUM spect  
PROBHD Z119470\_0187 (  
PULPROG deptq135  
TD 65536  
SOLVENT CDCl3  
NS 146  
DS 8  
SWH 29761.904 Hz  
FIDRES 0.908261 Hz  
AQ 1.1010048 sec  
RG 192.72  
RW 16.800 usec  
DE 6.50 usec  
TE 292.5 K  
CNST2 145.000000  
D1 2.00000000 sec  
D2 0.00344828 sec  
D12 0.00002000 sec  
TD0 1  
SFO1 125.7829381 MHz  
NUC1 13C  
P1 10.00 usec  
P2 20.00 usec  
PLW1 82.09700012 W  
SFO2 500.1820007 MHz  
NUC2 1H  
CPDPRG[2] waltz16  
P0 15.00 usec  
P3 10.00 usec  
P4 20.00 usec  
PCPD2 80.00 usec  
PLW2 18.10400009 W  
PLW12 0.28288001 W

F2 - Processing parameters  
SI 32768  
SF 125.7703610 MHz  
WDW EM  
SSB 0  
LB 1.00 Hz  
GB 0  
PC 5640

$^{13}\text{C}$  (DEPTQ135) NMR (125 MHz,  $\text{CDCl}_3$ ) of **R-28**

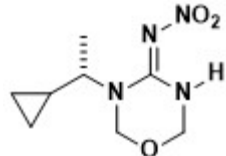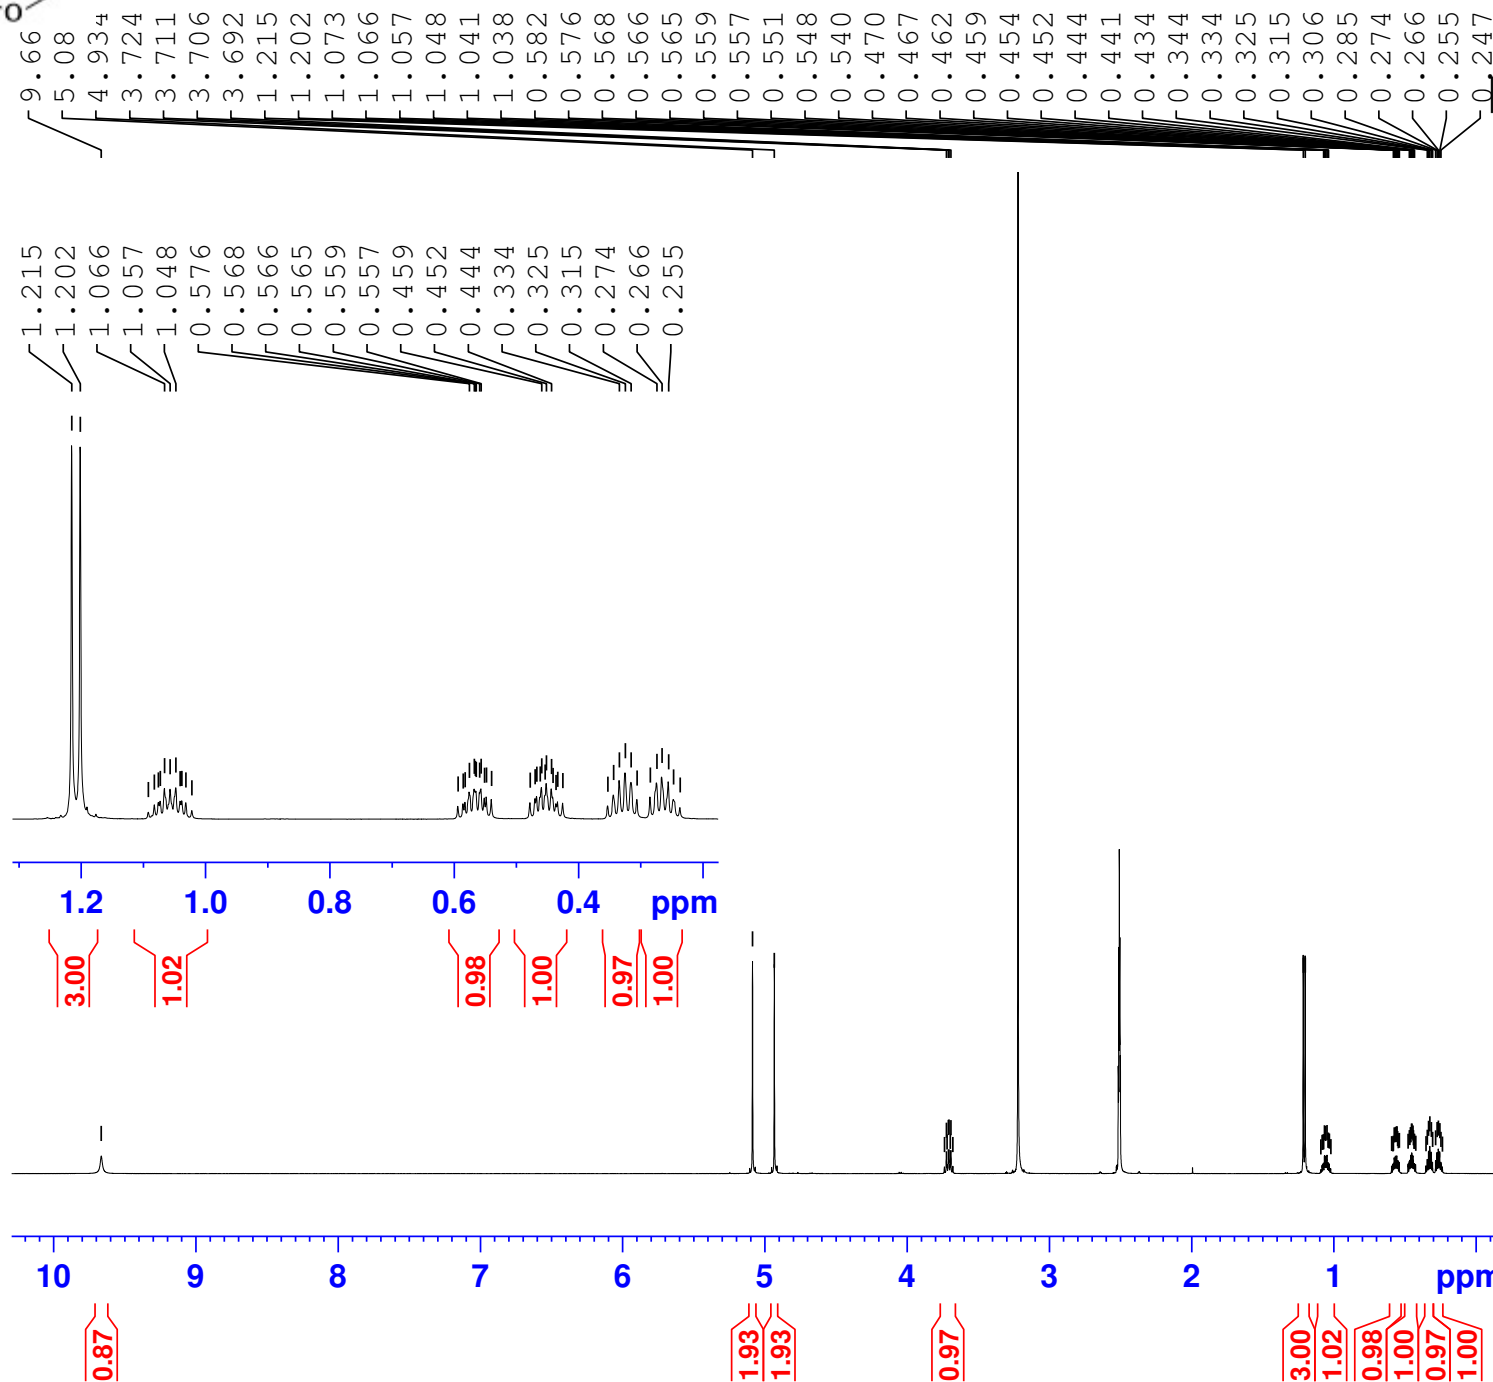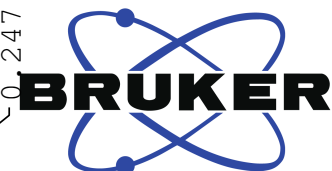

Current Data Parameters  
NAME S-29  
EXPNO 1  
PROCNO 1

F2 - Acquisition Parameters  
Date\_ 20180920  
Time 11.21 h  
INSTRUM spect  
PROBHD z119470\_0187 (  
PULPROG zg30  
TD 65536  
SOLVENT DMSO  
NS 5  
DS 1  
SWH 10000.000 Hz  
FIDRES 0.305176 Hz  
AQ 3.276799 sec  
RG 108.3  
DW 50.000 usec  
DE 6.50 usec  
TE 323.1 K  
D1 1.00000000 sec  
TD0 1  
SFO1 500.1830886 MHz  
NUC1 1H  
P0 3.33 usec  
P1 10.00 usec  
PLW1 18.10400009 W

F2 - Processing parameters  
SI 65536  
SF 500.1800000 MHz  
WDW EM  
SSB 0  
LB 0.30 Hz  
GB 0  
PC 1.00

<sup>1</sup>H NMR (500 MHz, DMSO-d<sub>6</sub>, 50°C) of S-29

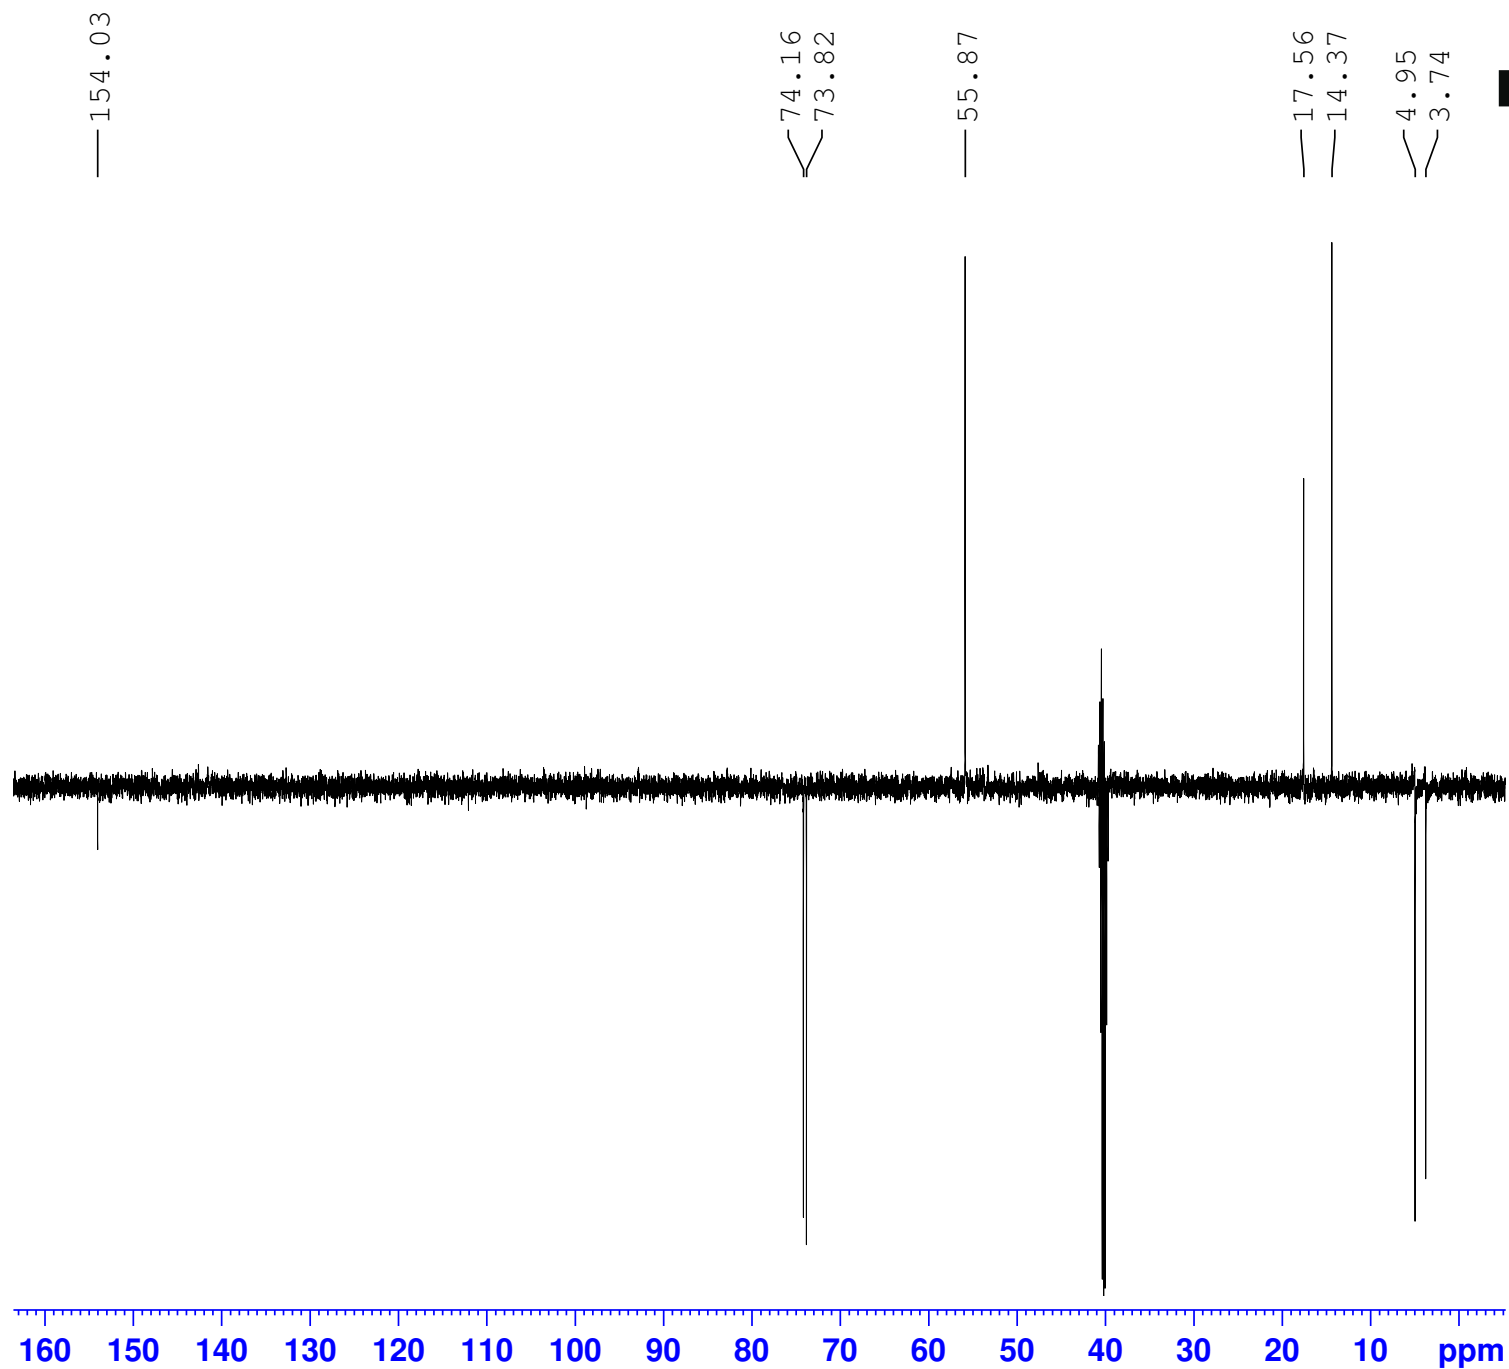

Current Data Parameters  
 NAME S-29  
 EXPNO 2  
 PROCNO 1

F2 - Acquisition Parameters  
 Date\_ 20180920  
 Time 11.32 h  
 INSTRUM spect  
 PROBHD Z119470\_0187 (  
 PULPROG deptq135  
 TD 65536  
 SOLVENT DMSO  
 NS 185  
 DS 8  
 SWH 29761.904 Hz  
 FIDRES 0.908261 Hz  
 AQ 1.1010048 sec  
 RG 192.72  
 DW 16.800 usec  
 DE 6.50 usec  
 TE 323.2 K  
 CNST2 145.000000  
 D1 2.00000000 sec  
 D2 0.00344828 sec  
 D12 0.00002000 sec  
 TD0 1  
 SFO1 125.7829381 MHz  
 NUC1 13C  
 P1 10.00 usec  
 P2 20.00 usec  
 PLW1 82.09700012 W  
 SFO2 500.1820007 MHz  
 NUC2 1H  
 CPDPRG[2] waltz16  
 P0 15.00 usec  
 P3 10.00 usec  
 P4 20.00 usec  
 PCPD2 80.00 usec  
 PLW2 18.10400009 W  
 PLW12 0.28288001 W

F2 - Processing parameters  
 SI 32768  
 SF 125.7703610 MHz  
 WDW EM  
 SSB 0  
 LB 1.00 Hz  
 GB 0  
 PC 1.40

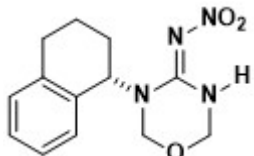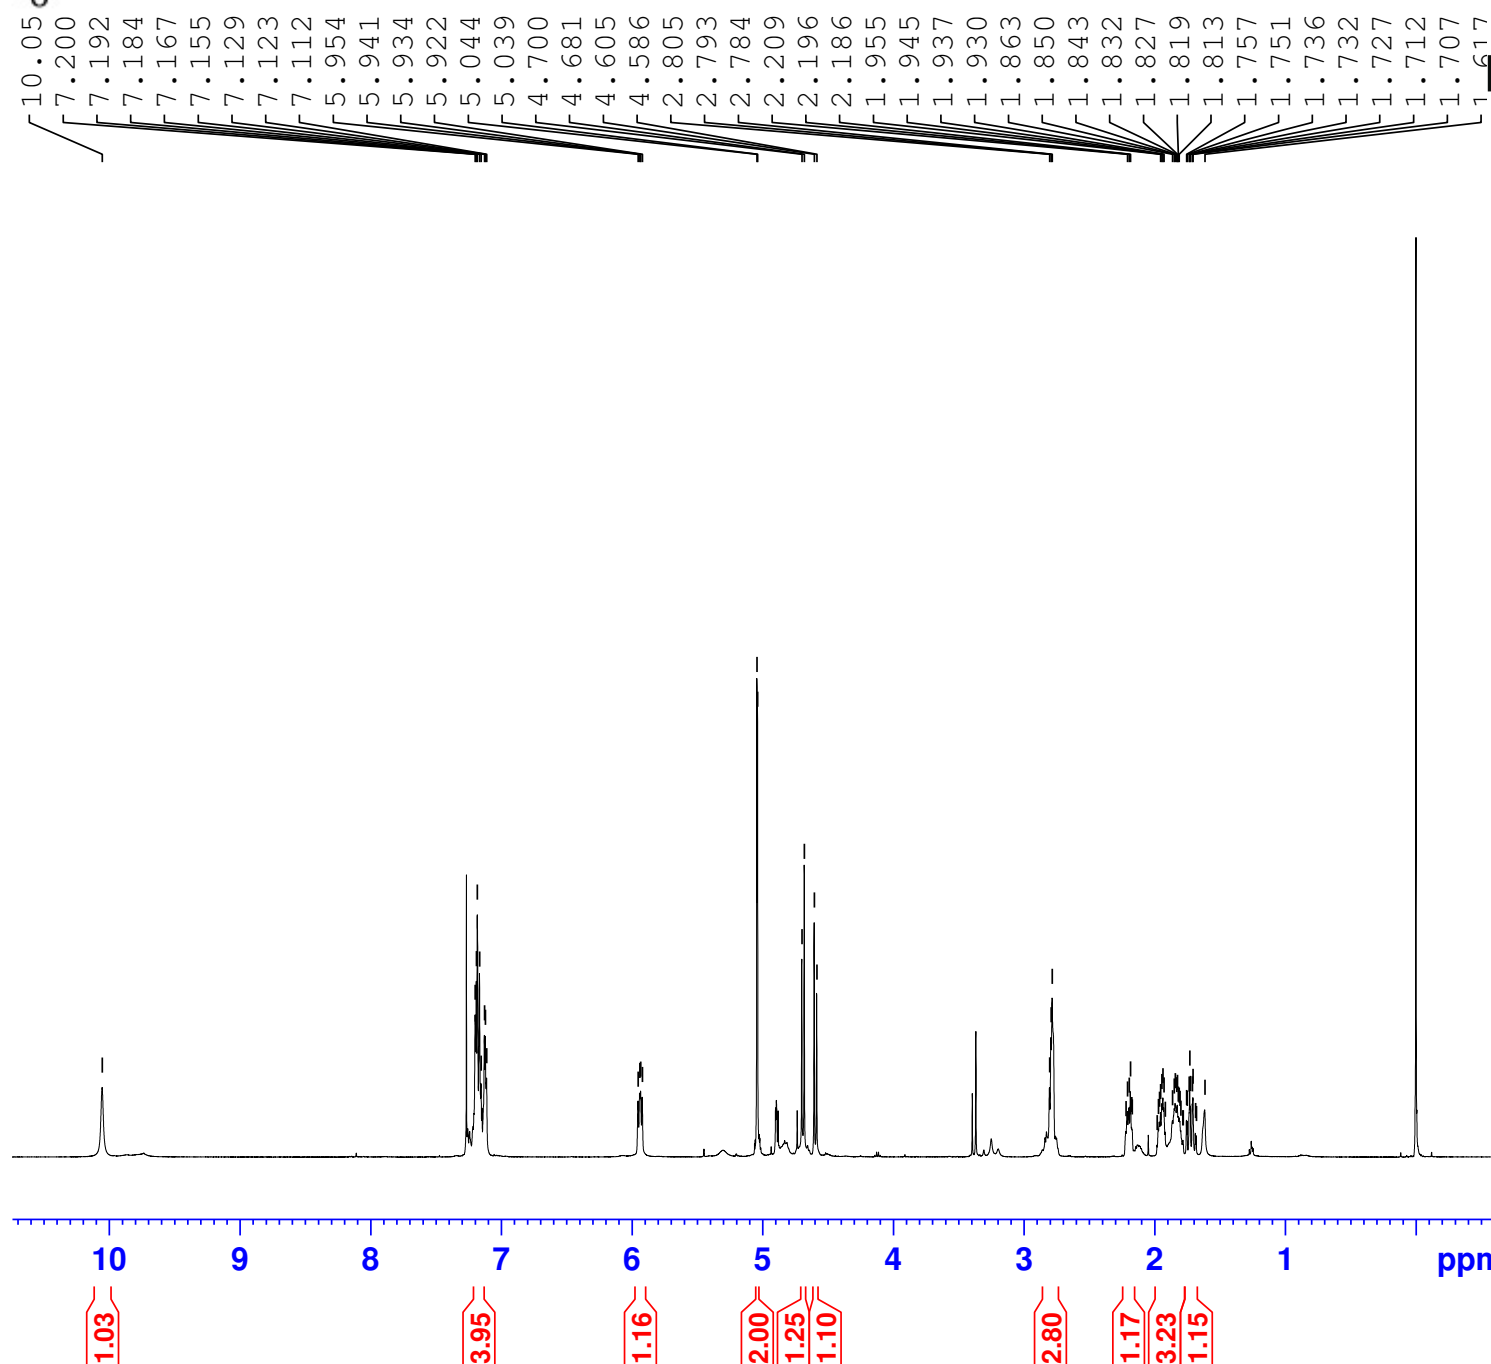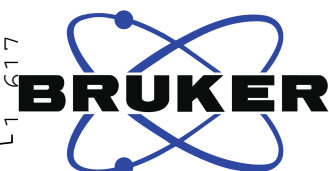

Current Data Parameters  
NAME S-30  
EXPNO 1  
PROCNO 1

F2 - Acquisition Parameters  
Date\_ 20180829  
Time 17.18 h  
INSTRUM spect  
PROBHD Z119470\_0187 (  
PULPROG zg30  
TD 65536  
SOLVENT CDCl3  
NS 10  
DS 1  
SWH 10000.000 Hz  
FIDRES 0.305176 Hz  
AQ 3.2767999 sec  
RG 108.3  
DW 50.000 usec  
DE 6.50 usec  
TE 291.1 K  
D1 1.00000000 sec  
TD0 1  
SFO1 500.1830886 MHz  
NUC1 1H  
P0 3.33 usec  
P1 10.00 usec  
PLW1 18.10400009 W

F2 - Processing parameters  
SI 65536  
SF 500.1800084 MHz  
WDW EM  
SSB 0  
LB 0.30 Hz  
GB 0  
PC 1.00

<sup>1</sup>H NMR (500 MHz, CDCl<sub>3</sub>) of S-30



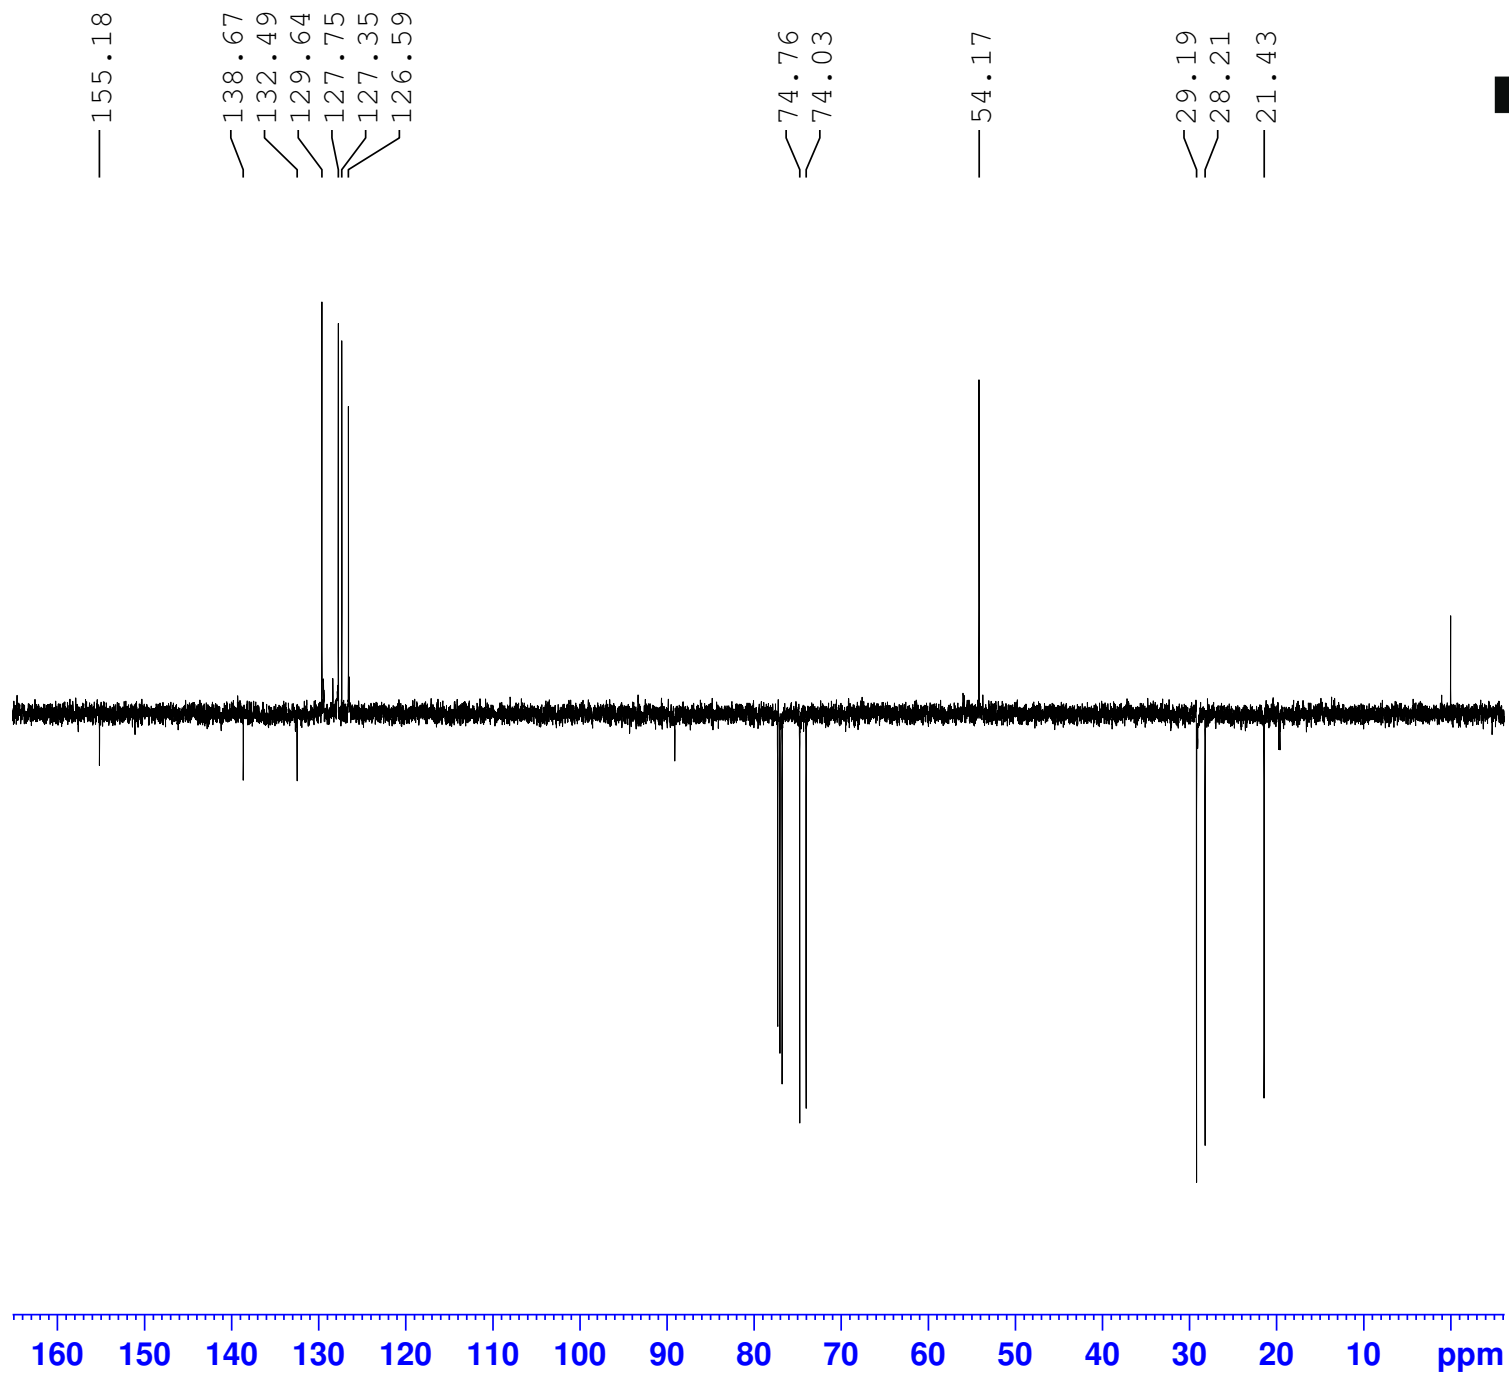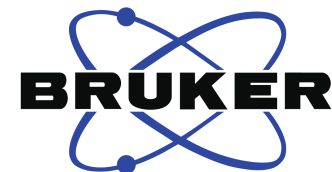

Current Data Parameters  
 NAME S-30  
 EXPNO 2  
 PROCNO 1

F2 - Acquisition Parameters  
 Date\_ 20180829  
 Time 17.29 h  
 INSTRUM spect  
 PROBHD Z119470\_0187 (  
 PULPROG deptq135  
 TD 65536  
 SOLVENT CDCl3  
 NS 157  
 DS 8  
 SWH 29761.904 Hz  
 FIDRES 0.908261 Hz  
 AQ 1.1010048 sec  
 RG 192.72  
 DW 16.800 usec  
 DE 6.50 usec  
 TE 291.7 K  
 CNST2 145.0000000  
 D1 2.00000000 sec  
 D2 0.00344828 sec  
 D12 0.00002000 sec  
 TD0 1  
 SFO1 125.7829381 MHz  
 NUC1 13C  
 P1 10.00 usec  
 P2 20.00 usec  
 PLW1 82.09700012 W  
 SFO2 500.1820007 MHz  
 NUC2 1H  
 CPDPRG[2] waltz16  
 P0 15.00 usec  
 P3 10.00 usec  
 P4 20.00 usec  
 PCPD2 80.00 usec  
 PLW2 18.10400009 W  
 PLW12 0.28288001 W

F2 - Processing parameters  
 SI 32768  
 SF 125.7703642 MHz  
 WDW EM  
 SSB 0  
 LB 1.00 Hz  
 GB 0  
 PC 60.40

$^{13}\text{C}$  (DEPTQ135) NMR (125 MHz,  $\text{CDCl}_3$ ) of S-30

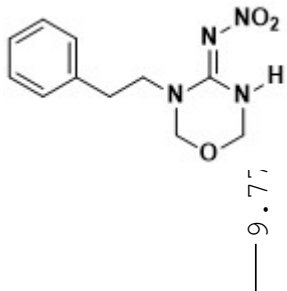

7.342  
7.331  
7.328  
7.316  
7.313  
7.273  
7.270  
7.266  
7.256  
7.225  
7.222  
7.209

4.897  
4.892  
4.456

3.680  
3.666  
3.653  
2.977  
2.964  
2.950

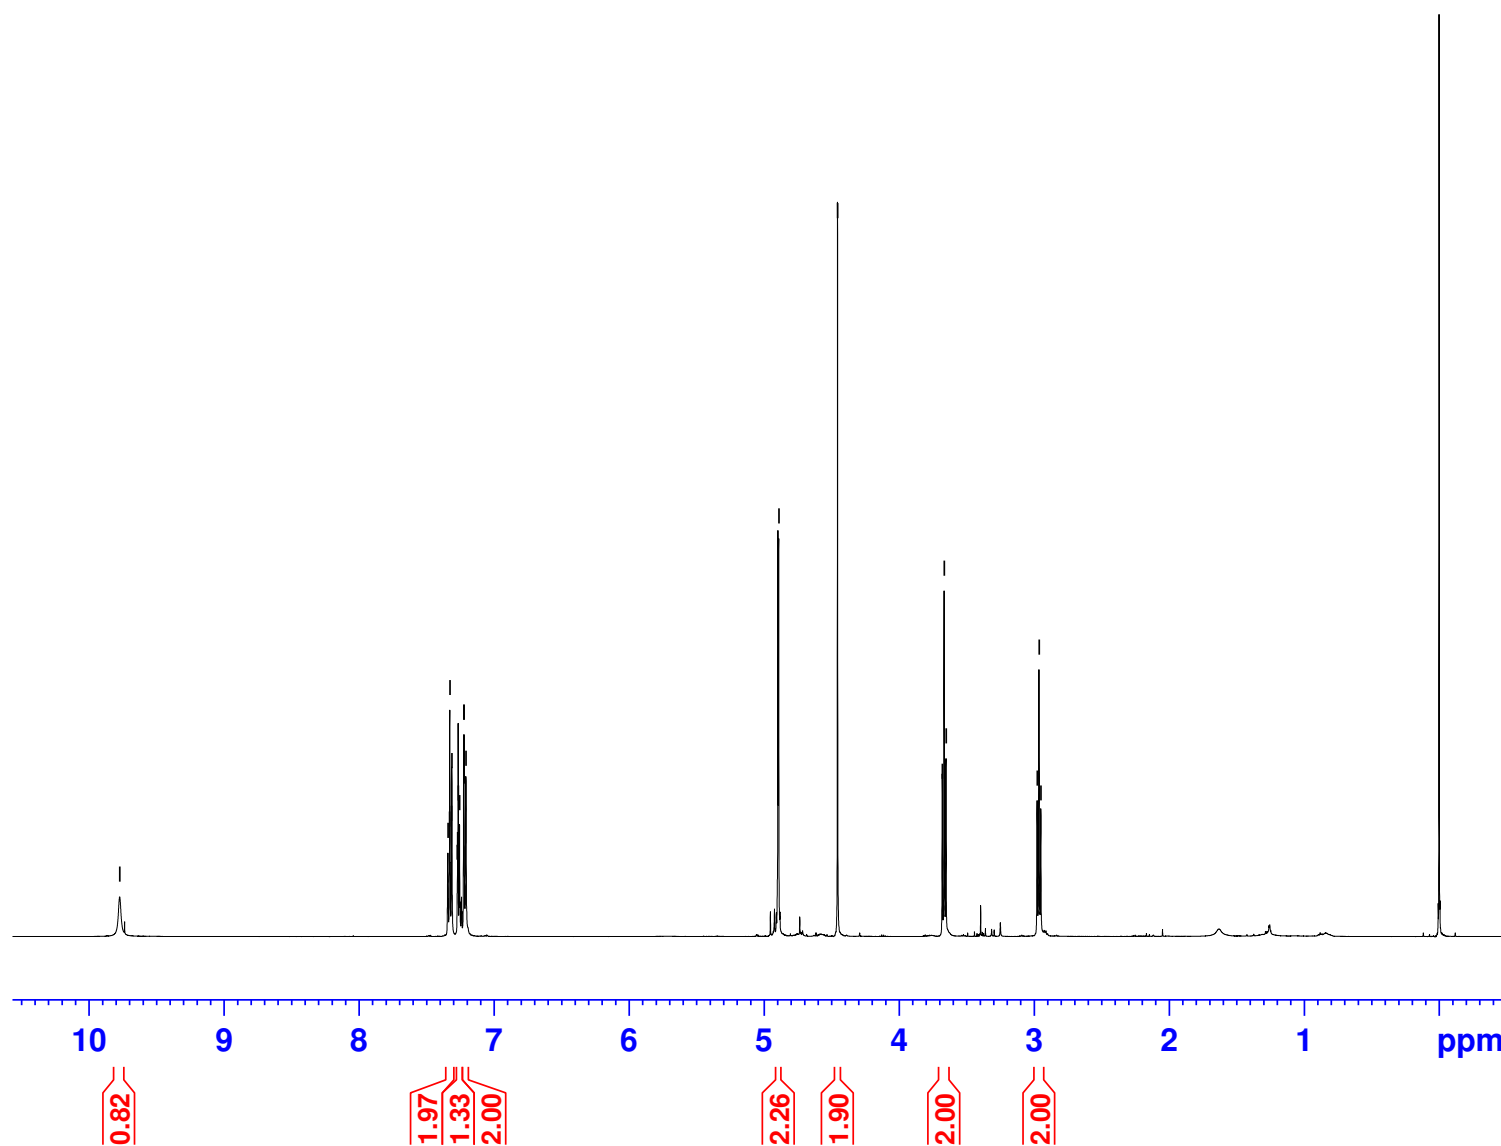

Current Data Parameters  
NAME R-31  
EXPNO 1  
PROCNO 1

F2 - Acquisition Parameters  
Date\_ 20180829  
Time 17.35 h  
INSTRUM spect  
PROBHD Z119470\_0187 (   
PULPROG zg30  
TD 65536  
SOLVENT CDCl3  
NS 16  
DS 2  
SWH 10000.000 Hz  
FIDRES 0.305176 Hz  
AQ 3.2767999 sec  
RG 139.09  
DW 50.000 usec  
DE 6.50 usec  
TE 291.8 K  
D1 1.00000000 sec  
TD0 1  
SFO1 500.1830886 MHz  
NUC1 1H  
P0 3.33 usec  
P1 10.00 usec  
PLW1 18.10400009 W

F2 - Processing parameters  
SI 65536  
SF 500.1800090 MHz  
WDW EM  
SSB 0  
LB 0.30 Hz  
GB 0  
PC 1.00

<sup>1</sup>H NMR (500 MHz, CDCl<sub>3</sub>) of **R-31**

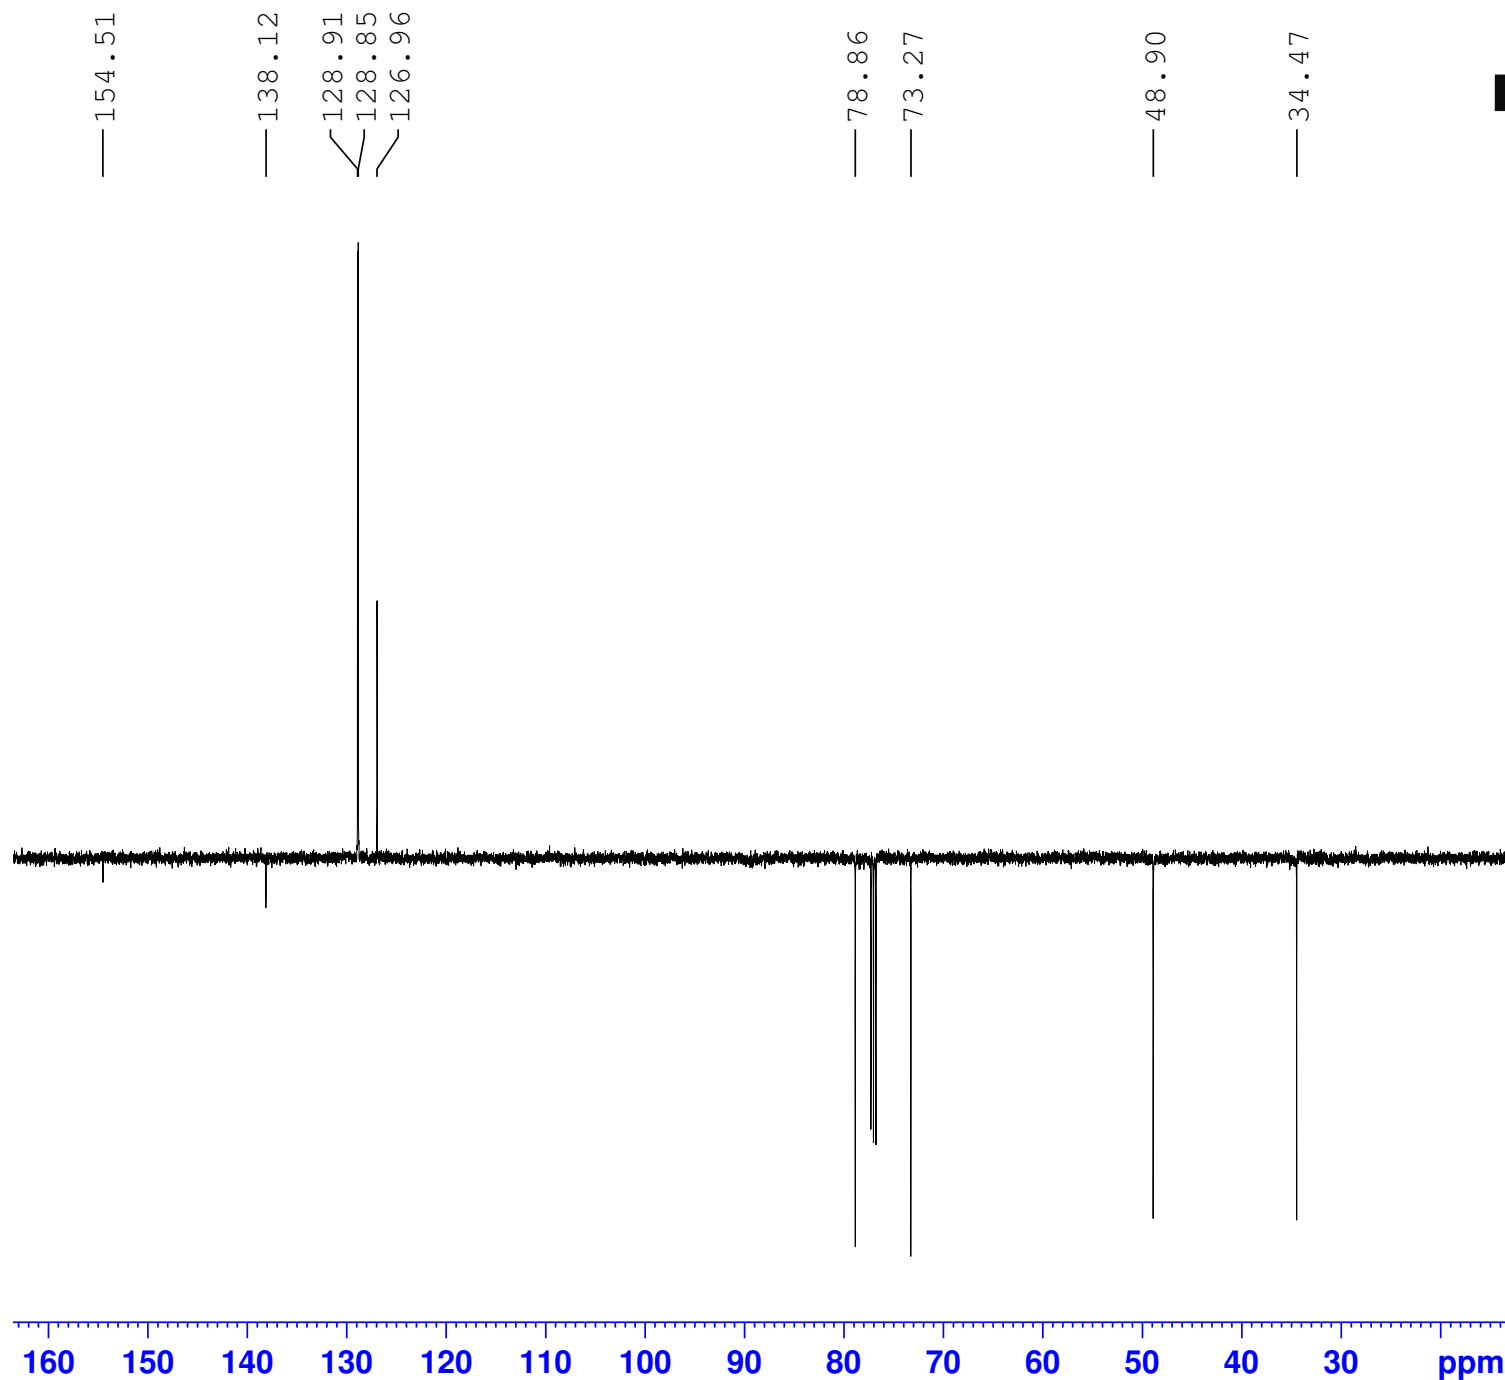

Current Data Parameters  
NAME R-31  
EXPNO 2  
PROCNO 1

F2 - Acquisition Parameters  
Date\_ 20180829  
Time 17.50 h  
INSTRUM spect  
PROBHD Z119470\_0187 (  
PULPROG deptq135  
TD 65536  
SOLVENT CDCl3  
NS 256  
DS 8  
SWH 29761.904 Hz  
FIDRES 0.908261 Hz  
AQ 1.1010048 sec  
RG 192.72  
DW 16.800 usec  
DE 6.50 usec  
TE 292.3 K  
CNST2 145.000000  
D1 2.0000000 sec  
D2 0.00344828 sec  
D12 0.00002000 sec  
TD0 1  
SFO1 125.7829381 MHz  
NUC1 13C  
P1 10.00 usec  
P2 20.00 usec  
PLW1 82.09700012 W  
SFO2 500.1820007 MHz  
NUC2 1H  
CPDPRG[2] waltz16  
P0 15.00 usec  
P3 10.00 usec  
P4 20.00 usec  
PCPD2 80.00 usec  
PLW2 18.10400009 W  
PLW12 0.28288001 W

F2 - Processing parameters  
SI 32768  
SF 125.7703641 MHz  
WDW EM  
SSB 0  
LB 1.00 Hz  
GB 0  
PC 1.40

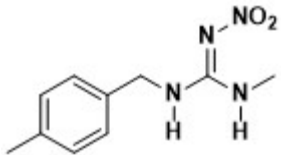

— 9.174

— 7.791

7.197

7.181

7.161

7.146

— 4.380

— 2.842

— 2.282

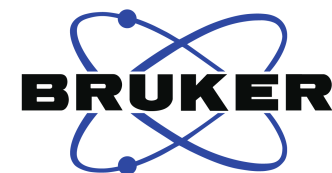

Current Data Parameters  
NAME 33  
EXPNO 1  
PROCNO 1

F2 - Acquisition Parameters  
Date\_ 20181012  
Time 18.21 h  
INSTRUM spect  
PROBHD Z119470\_0187 (  
PULPROG zg30  
TD 65536  
SOLVENT DMSO  
NS 16  
DS 1  
SWH 10000.000 Hz  
FIDRES 0.305176 Hz  
AQ 3.2767999 sec  
RG 77.78  
DW 50.000 usec  
DE 6.50 usec  
TE 292.0 K  
D1 1.00000000 sec  
TD0 1  
SFO1 500.1830886 MHz  
NUC1 1H  
P0 3.33 usec  
P1 10.00 usec  
PLW1 18.10400009 W

F2 - Processing parameters  
SI 65536  
SF 500.1800000 MHz  
WDW EM  
SSB 0  
LB 0.30 Hz  
GB 0  
PC 1.00

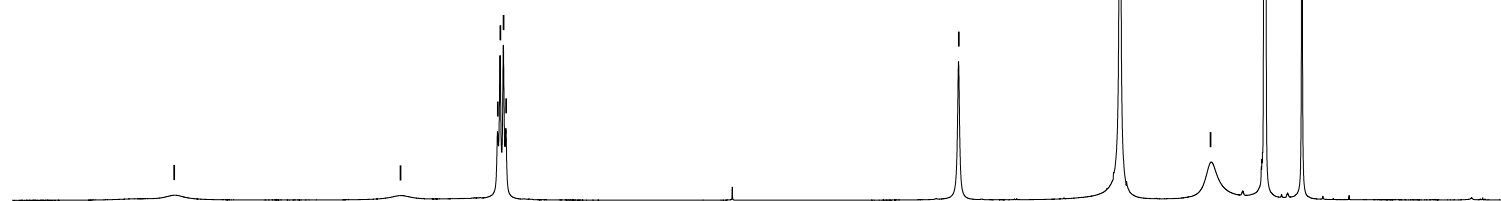

10 9 8 7 6 5 4 3 2 ppm

0.57

0.58

4.01

2.02

3.02

3.00

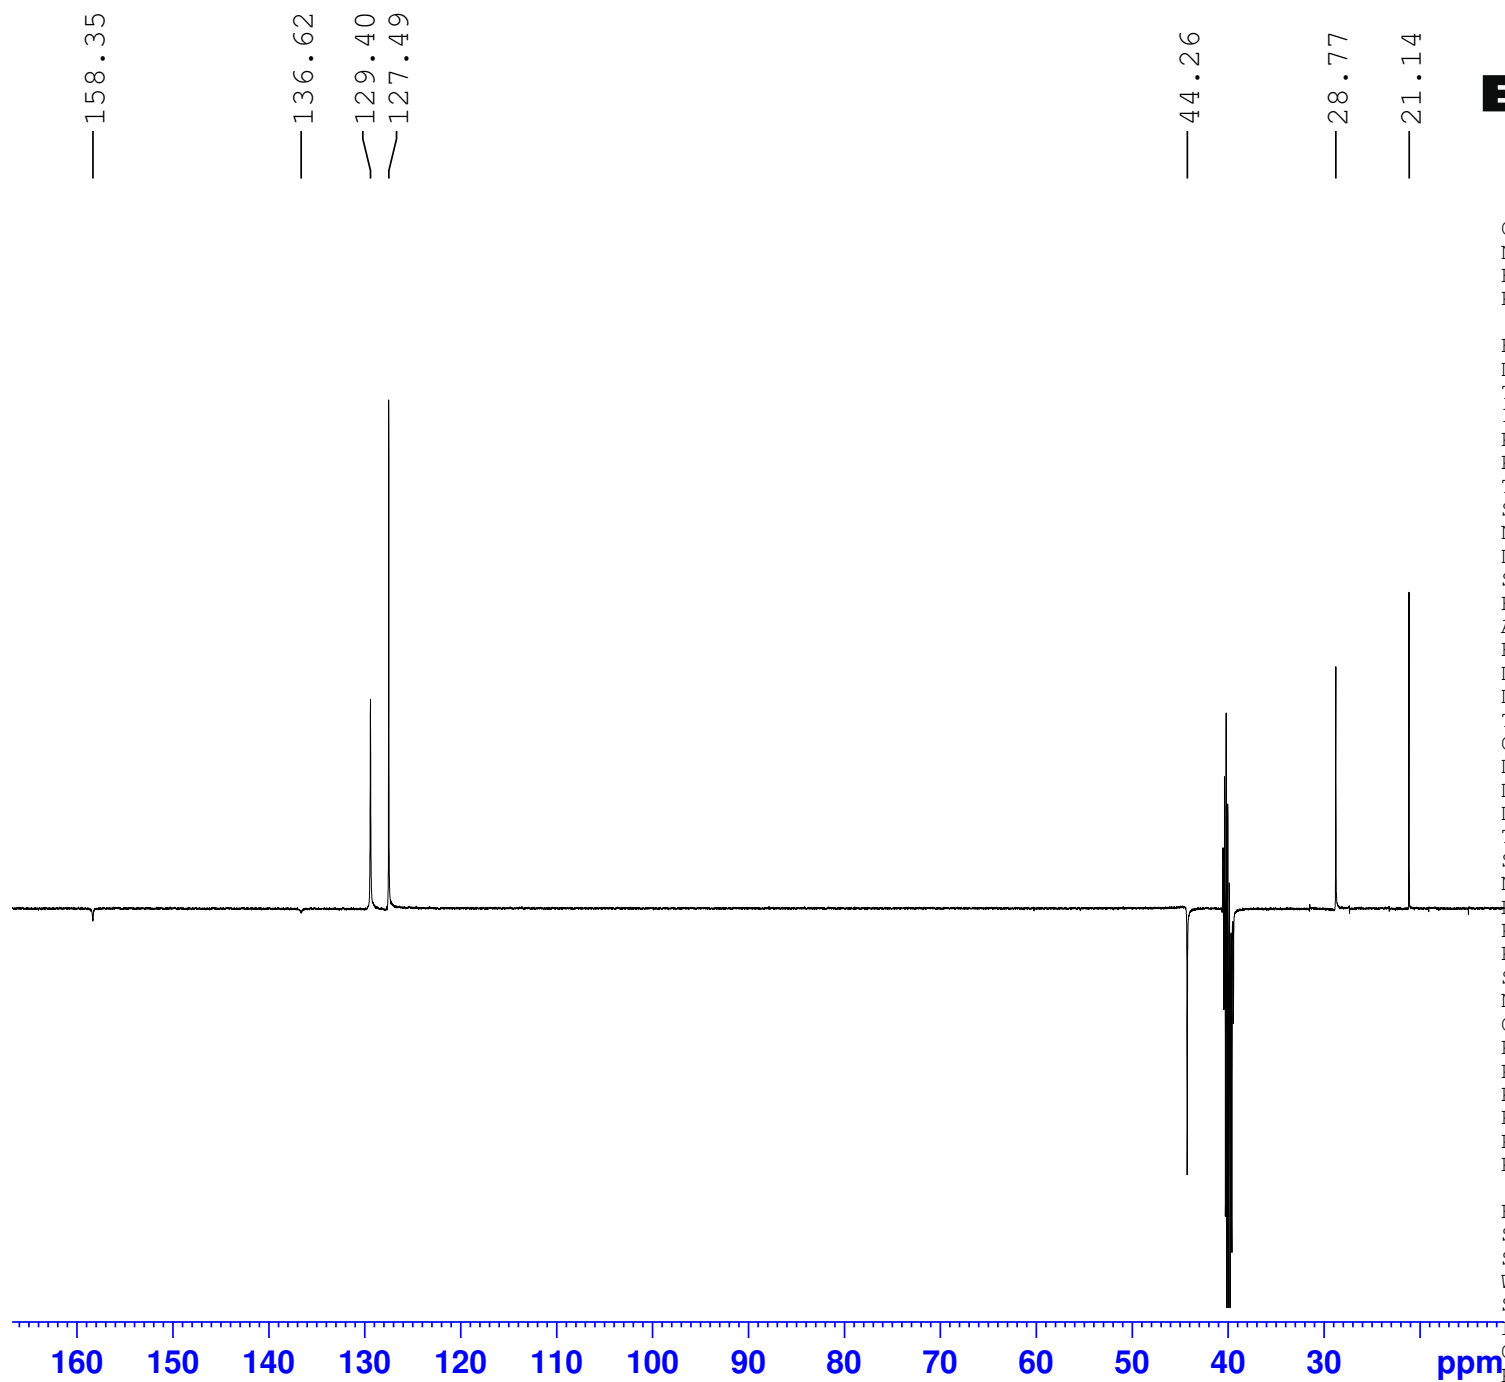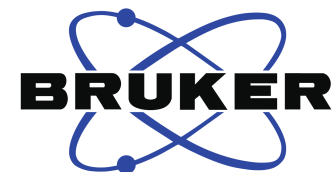

Current Data Parameters  
 NAME 33  
 EXPNO 2  
 PROCNO 1

F2 - Acquisition Parameters  
 Date\_ 20181013  
 Time 12.17 h  
 INSTRUM spect  
 PROBHD Z119470\_0187 (  
 PULPROG deptq135  
 TD 65536  
 SOLVENT DMSO  
 NS 20480  
 DS 8  
 SWH 29761.904 Hz  
 FIDRES 0.908261 Hz  
 AQ 1.1010048 sec  
 RG 192.72  
 DW 16.800 usec  
 DE 6.50 usec  
 TE 292.1 K  
 CNST2 145.0000000  
 D1 2.00000000 sec  
 D2 0.00344828 sec  
 D12 0.00002000 sec  
 TD0 1  
 SFO1 125.7829381 MHz  
 NUC1 13C  
 P1 10.00 usec  
 P2 20.00 usec  
 PLW1 82.09700012 W  
 SFO2 500.1820007 MHz  
 NUC2 1H  
 CPDPRG[2] waltz16  
 P0 15.00 usec  
 P3 10.00 usec  
 P4 20.00 usec  
 PCPD2 80.00 usec  
 PLW2 18.10400009 W  
 PLW12 0.28288001 W

F2 - Processing parameters  
 SI 32768  
 SF 125.7703610 MHz  
 WDW EM  
 SSB 0  
 LB 1.00 Hz  
 GB 0  
 PC 1.40

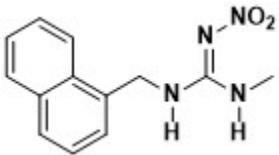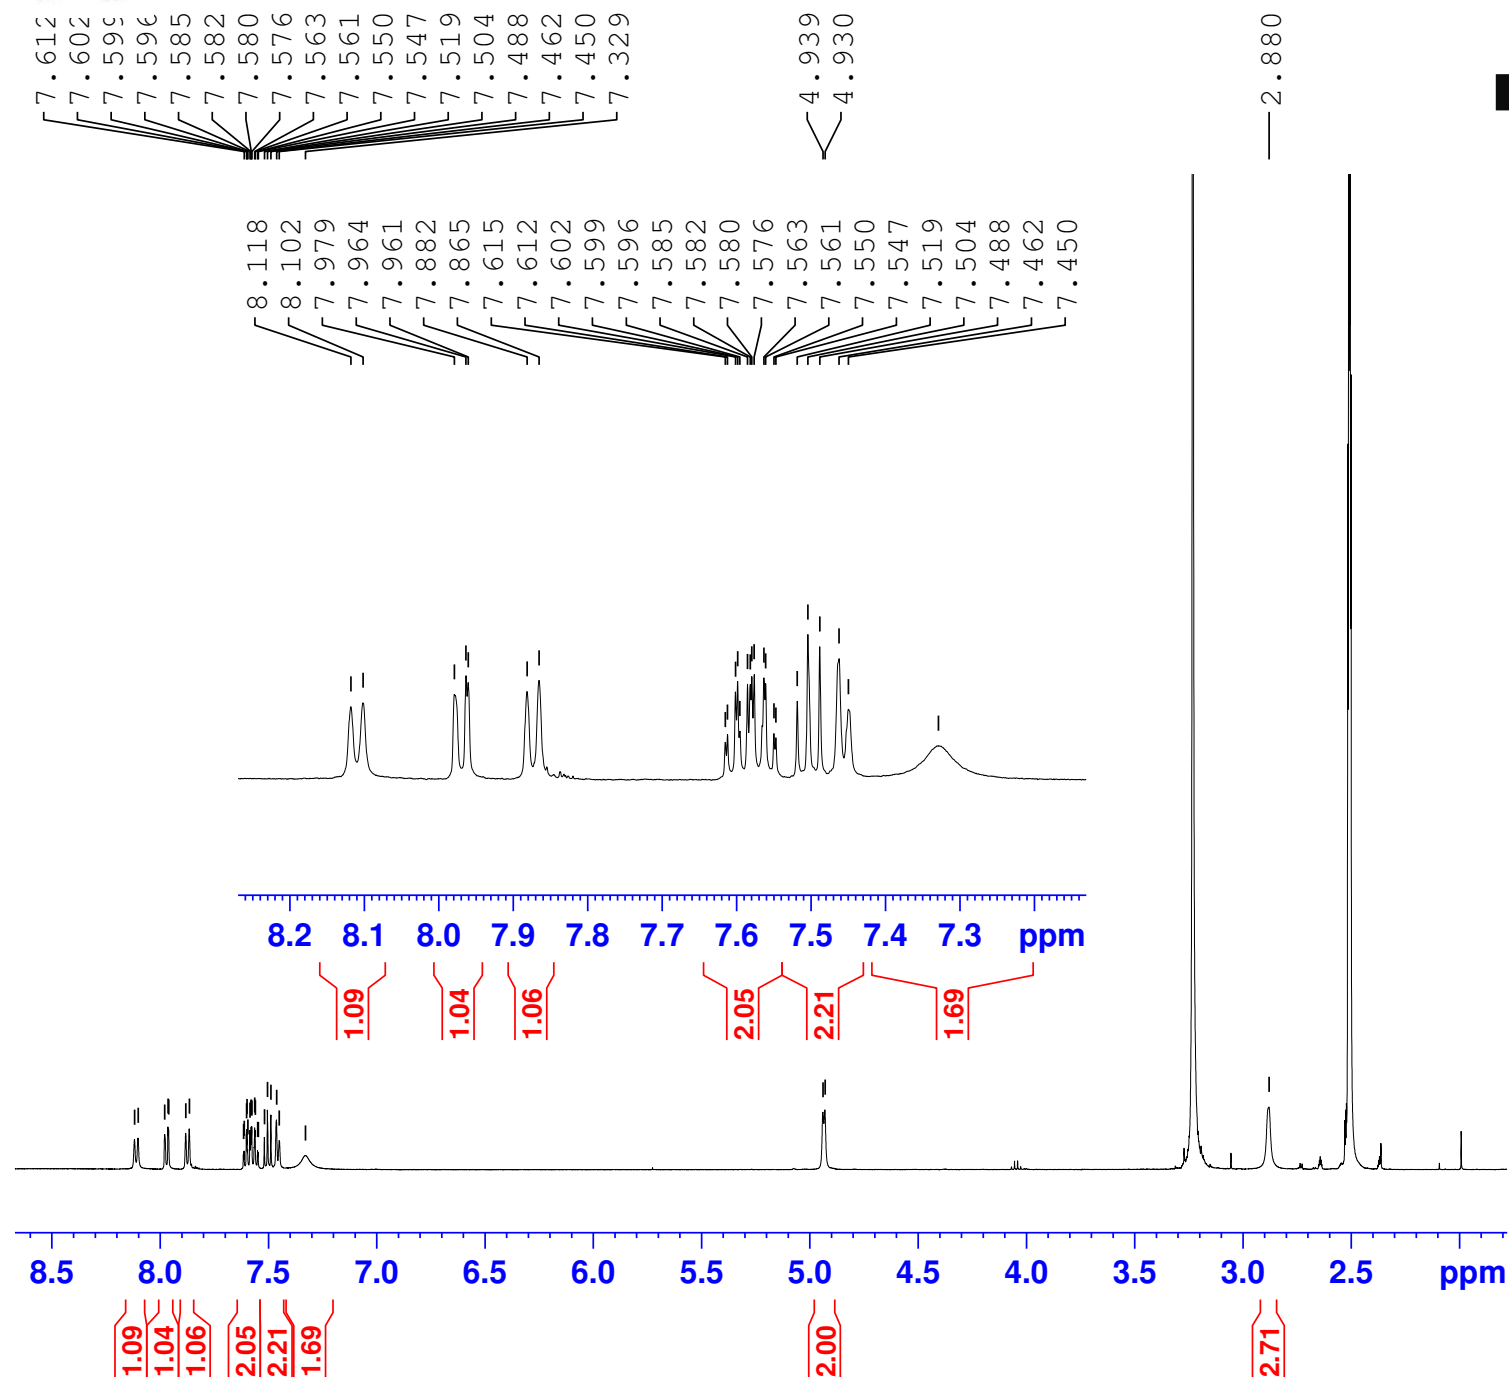

Current Data Parameters  
 NAME 34  
 EXPNO 2  
 PROCNO 1

F2 - Acquisition Parameters  
 Date\_ 20180904  
 Time 17.08 h  
 INSTRUM spect  
 PROBHD Z119470\_0187 (  
 PULPROG zg30  
 TD 65536  
 SOLVENT DMSO  
 NS 16  
 DS 2  
 SWH 10000.000 Hz  
 FIDRES 0.305176 Hz  
 AQ 3.2767999 sec  
 RG 139.09  
 DW 50.000 usec  
 DE 6.50 usec  
 TE 323.3 K  
 D1 1.00000000 sec  
 TD0 1  
 SFO1 500.1830886 MHz  
 NUC1 1H  
 P0 3.33 usec  
 P1 10.00 usec  
 PLW1 18.10400009 W

F2 - Processing parameters  
 SI 65536  
 SF 500.1800000 MHz  
 WDW EM  
 SSB 0  
 LB 0.30 Hz  
 GB 0  
 PC 1.00

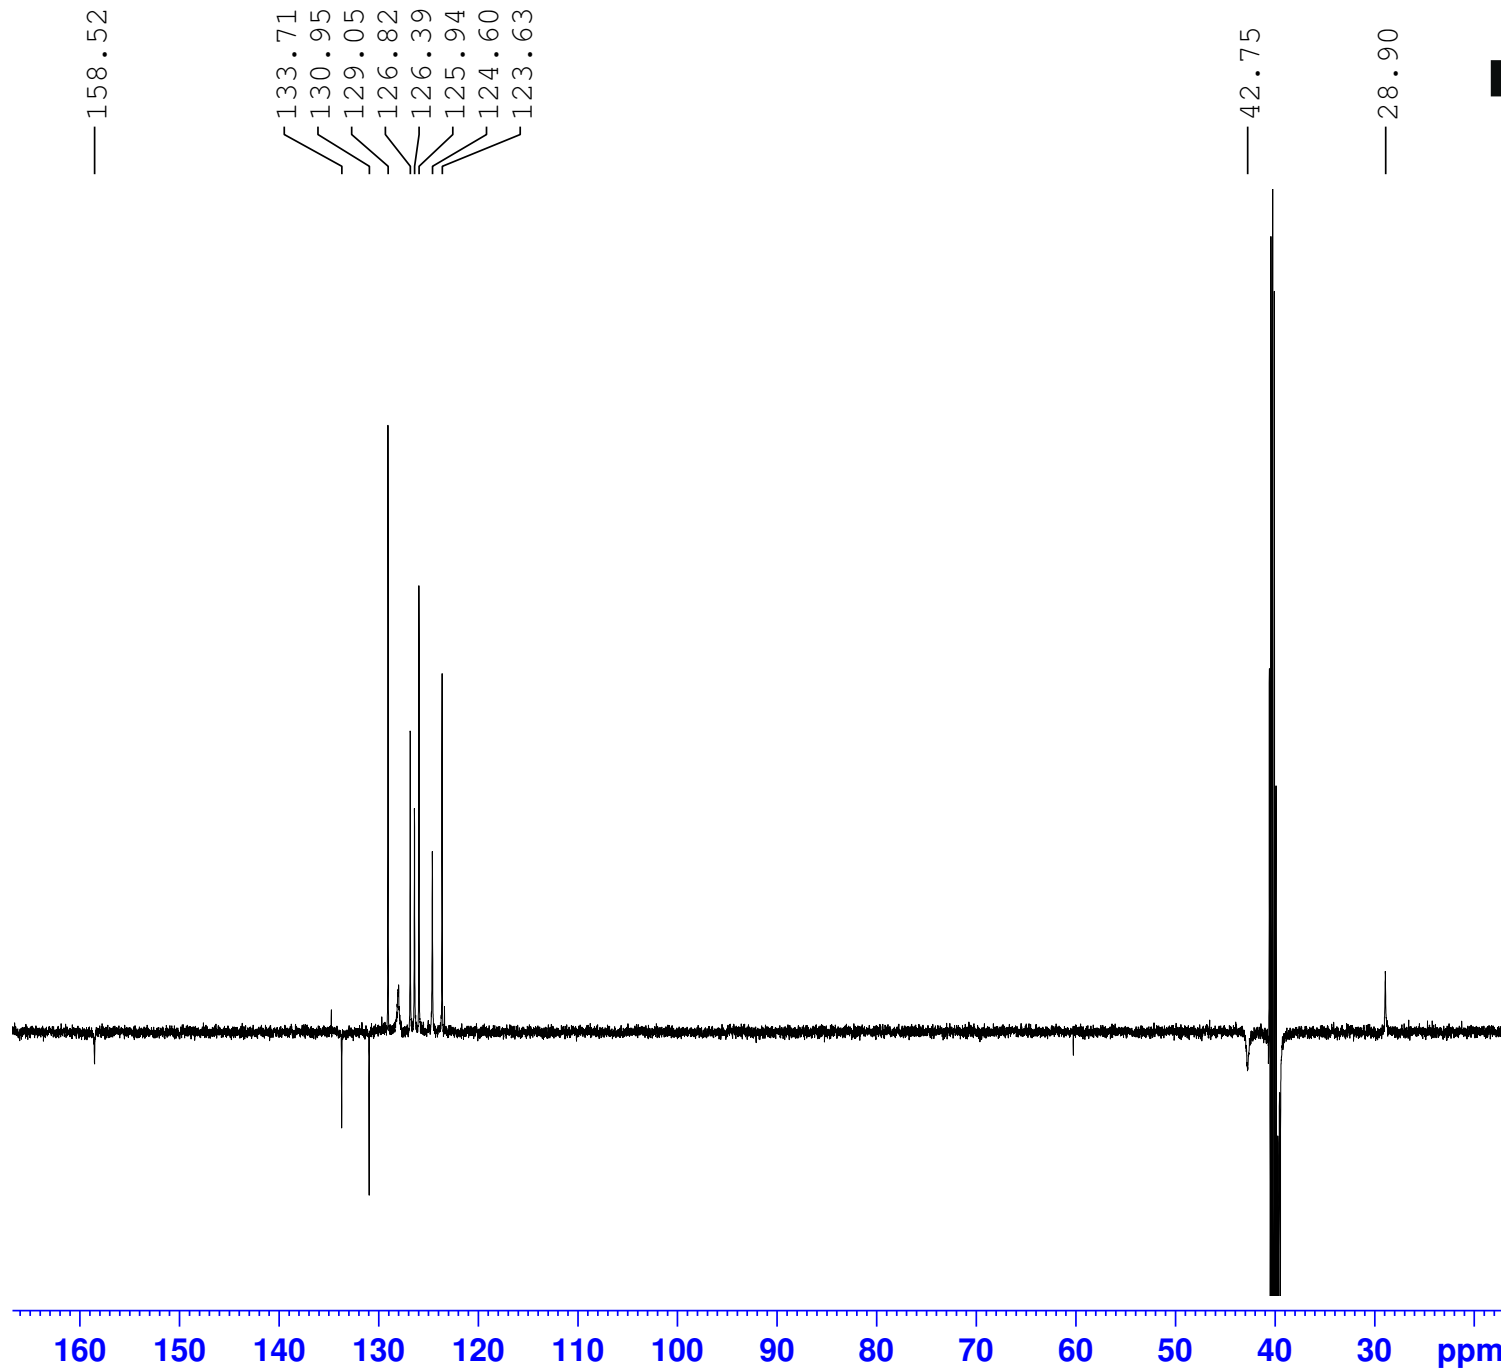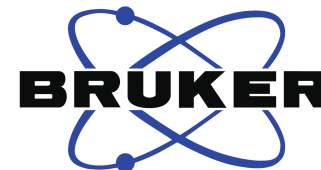

Current Data Parameters  
NAME 34  
EXPNO 3  
PROCNO 1

F2 - Acquisition Parameters  
Date\_ 20180905  
Time 9.23 h  
INSTRUM spect  
PROBHD Z119470\_0187 (  
PULPROG deptq135  
TD 65536  
SOLVENT DMSO  
NS 18519  
DS 8  
SWH 29761.904 Hz  
FIDRES 0.908261 Hz  
AQ 1.1010048 sec  
RG 192.72  
DW 16.800 usec  
DE 6.50 usec  
TE 297.9 K  
CNST2 145.0000000  
D1 2.00000000 sec  
D2 0.00344828 sec  
D12 0.00002000 sec  
TD0 1  
SFO1 125.7829381 MHz  
NUC1 13C  
P1 10.00 usec  
P2 20.00 usec  
PLW1 82.09700012 W  
SFO2 500.1820007 MHz  
NUC2 1H  
CPDPRG[2] waltz16  
P0 15.00 usec  
P3 10.00 usec  
P4 20.00 usec  
PCPD2 80.00 usec  
PLW2 18.10400009 W  
PLW12 0.28288001 W

F2 - Processing parameters  
SI 32768  
SF 125.7703610 MHz  
WDW EM  
SSB 0  
LB 1.00 Hz  
GB 0  
PC 1.40

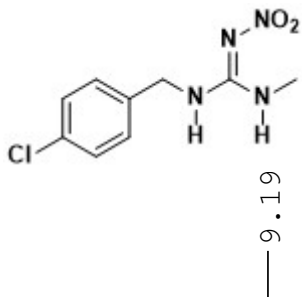

— 7.856  
 — 7.417  
 — 7.400  
 — 7.330  
 — 7.313

— 4.411

— 2.853

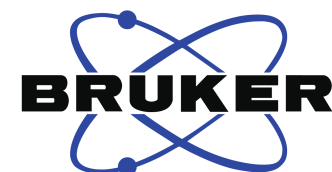

Current Data Parameters  
 NAME 35  
 EXPNO 1  
 PROCNO 1

F2 - Acquisition Parameters  
 Date\_ 20180831  
 Time 12.22 h  
 INSTRUM spect  
 PROBHD Z119470\_0187 (  
 PULPROG zg30  
 TD 65536  
 SOLVENT DMSO  
 NS 16  
 DS 2  
 SWH 10000.000 Hz  
 FIDRES 0.305176 Hz  
 AQ 3.2767999 sec  
 RG 77.78  
 DW 50.000 usec  
 DE 6.50 usec  
 TE 292.8 K  
 D1 1.00000000 sec  
 TD0 1  
 SFO1 500.1830886 MHz  
 NUC1 1H  
 P0 3.33 usec  
 P1 10.00 usec  
 PLW1 18.10400009 W

F2 - Processing parameters  
 SI 65536  
 SF 500.1800000 MHz  
 WDW EM  
 SSB 0  
 LB 0.30 Hz  
 GB 0  
 PC 1.00

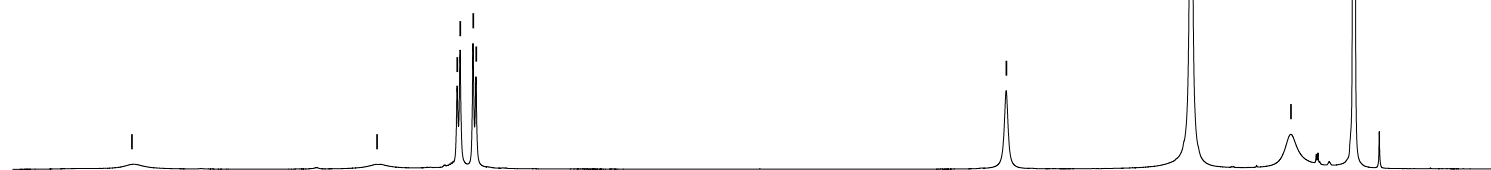

9.5 9.0 8.5 8.0 7.5 7.0 6.5 6.0 5.5 5.0 4.5 4.0 3.5 3.0 2.5 ppm

0.63

0.66

2.07

2.06

2.00

2.99

<sup>1</sup>H NMR (500 MHz, DMSO-d<sub>6</sub>) of **35**



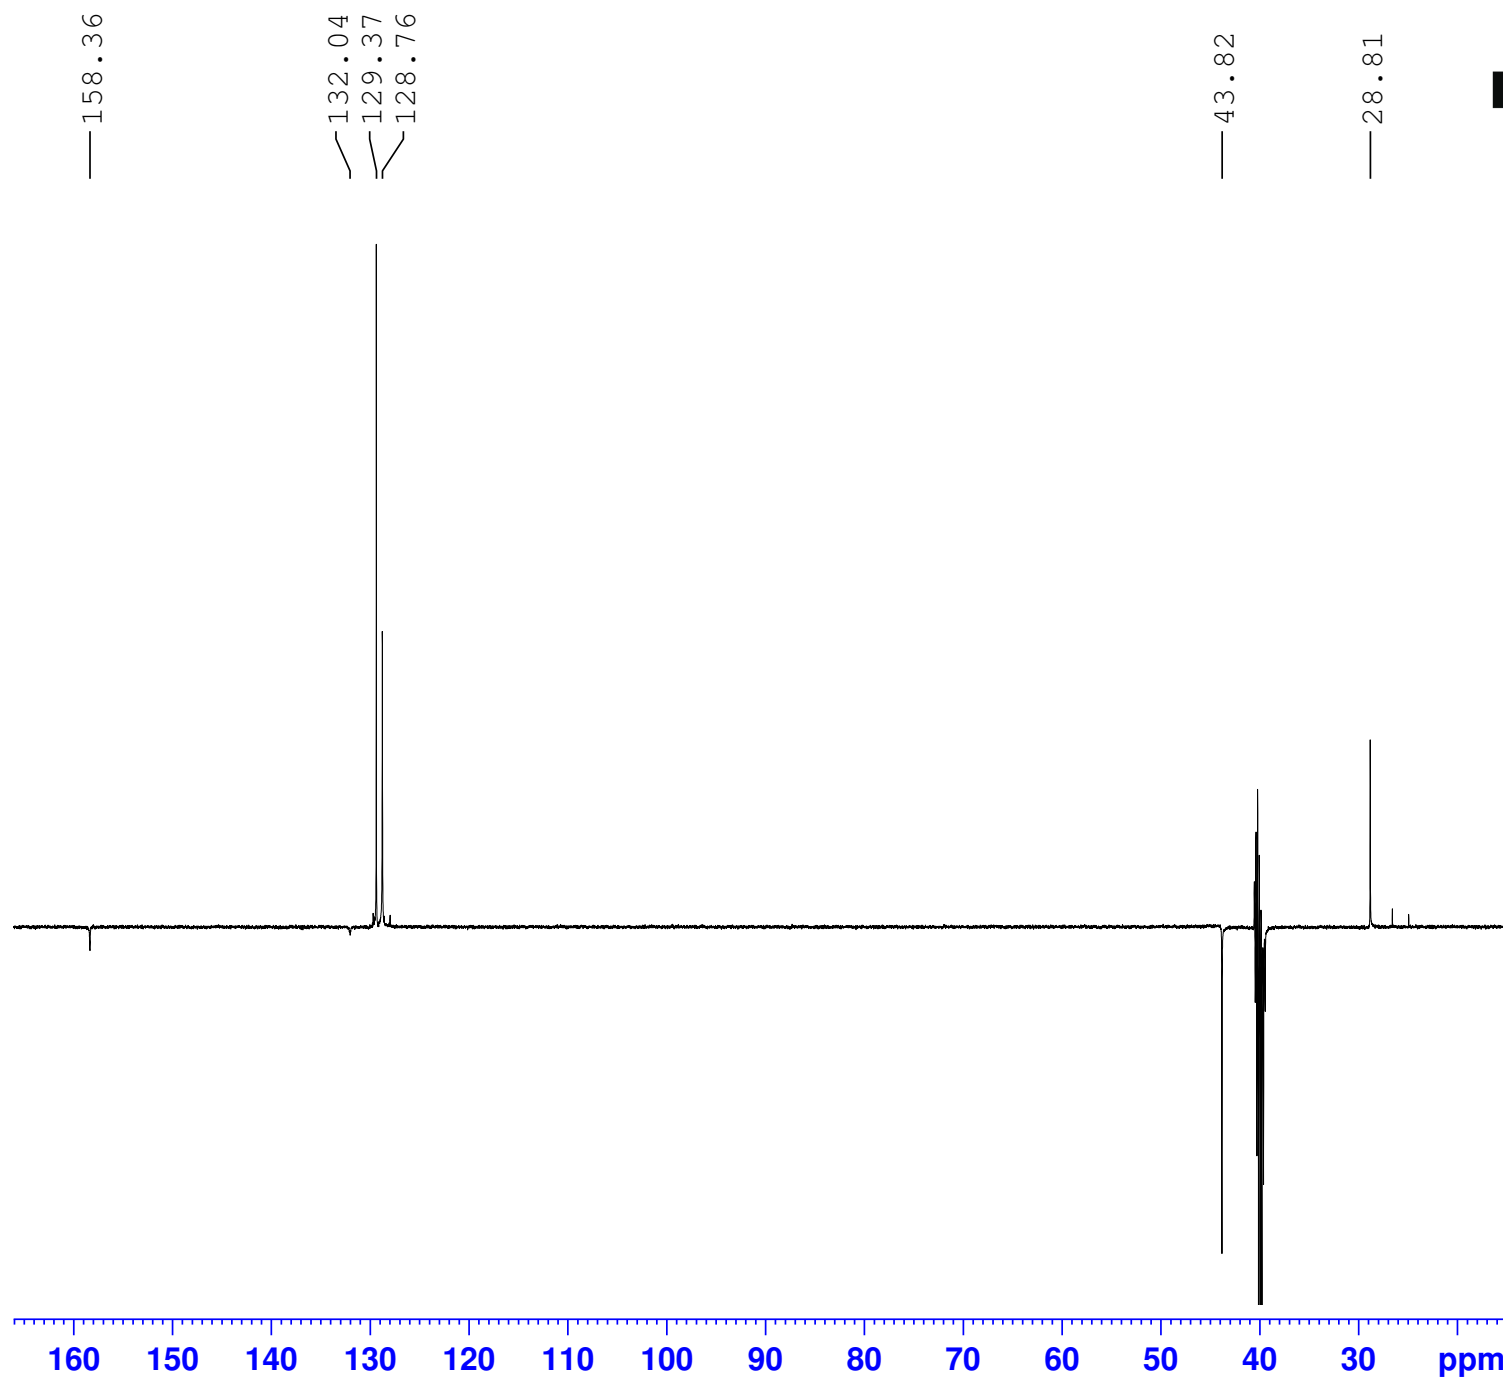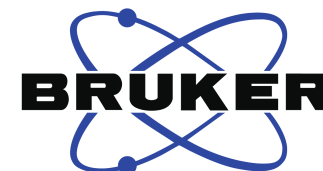

Current Data Parameters  
 NAME 35  
 EXPNO 2  
 PROCNO 1

F2 - Acquisition Parameters  
 Date\_ 20180831  
 Time 18.49 h  
 INSTRUM spect  
 PROBHD Z119470\_0187 (  
 PULPROG deptq135  
 TD 65536  
 SOLVENT DMSO  
 NS 6952  
 DS 8  
 SWH 29761.904 Hz  
 FIDRES 0.908261 Hz  
 AQ 1.1010048 sec  
 RG 192.72  
 DW 16.800 usec  
 DE 6.50 usec  
 TE 294.1 K  
 CNST2 145.0000000  
 D1 2.00000000 sec  
 D2 0.00344828 sec  
 D12 0.00002000 sec  
 TD0 1  
 SFO1 125.7829381 MHz  
 NUC1 13C  
 P1 10.00 usec  
 P2 20.00 usec  
 PLW1 82.09700012 W  
 SFO2 500.1820007 MHz  
 NUC2 1H  
 CPDPRG[2] waltz16  
 P0 15.00 usec  
 P3 10.00 usec  
 P4 20.00 usec  
 PCPD2 80.00 usec  
 PLW2 18.10400009 W  
 PLW12 0.28680280 W

F2 - Processing parameters  
 SI 32768  
 SF 125.7703610 MHz  
 WDW EM  
 SSB 0  
 LB 1.00 Hz  
 GB 0  
 PC 1.40

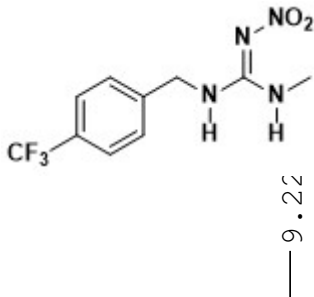

7.890  
7.726  
7.710  
7.517  
7.501

— 4.513

— 2.875



Current Data Parameters  
NAME 36  
EXPNO 2  
PROCNO 1

F2 - Acquisition Parameters  
Date\_ 20180928  
Time 12.49 h  
INSTRUM spect  
PROBHD Z119470\_0187 (  
PULPROG zg30  
TD 65536  
SOLVENT DMSO  
NS 5  
DS 1  
SWH 10000.000 Hz  
FIDRES 0.305176 Hz  
AQ 3.2767999 sec  
RG 108.3  
DW 50.000 usec  
DE 6.50 usec  
TE 293.1 K  
D1 1.00000000 sec  
TD0 1  
SFO1 500.1830886 MHz  
NUC1 1H  
P0 3.33 usec  
P1 10.00 usec  
PLW1 18.10400009 W

F2 - Processing parameters  
SI 65536  
SF 500.1800000 MHz  
WDW EM  
SSB 0  
LB 0.30 Hz  
GB 0  
PC 1.00

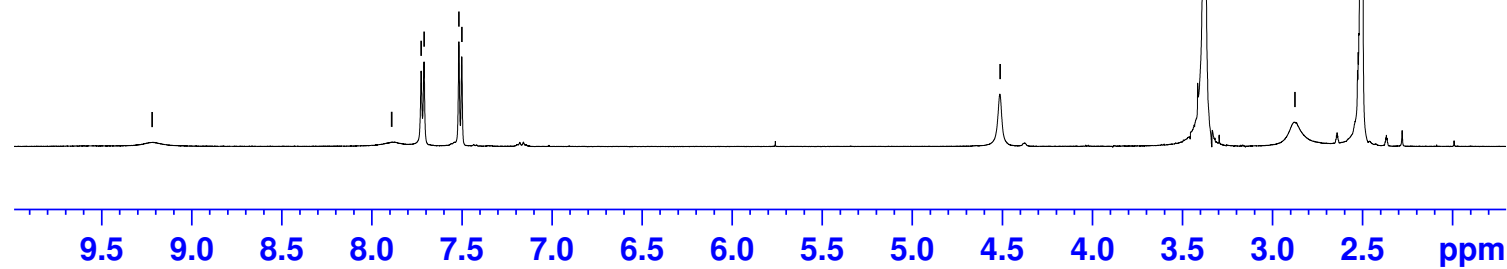

0.61

0.62

2.00

2.02

1.93

2.71

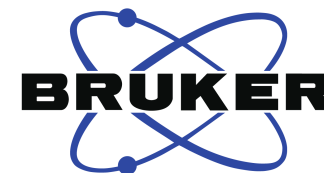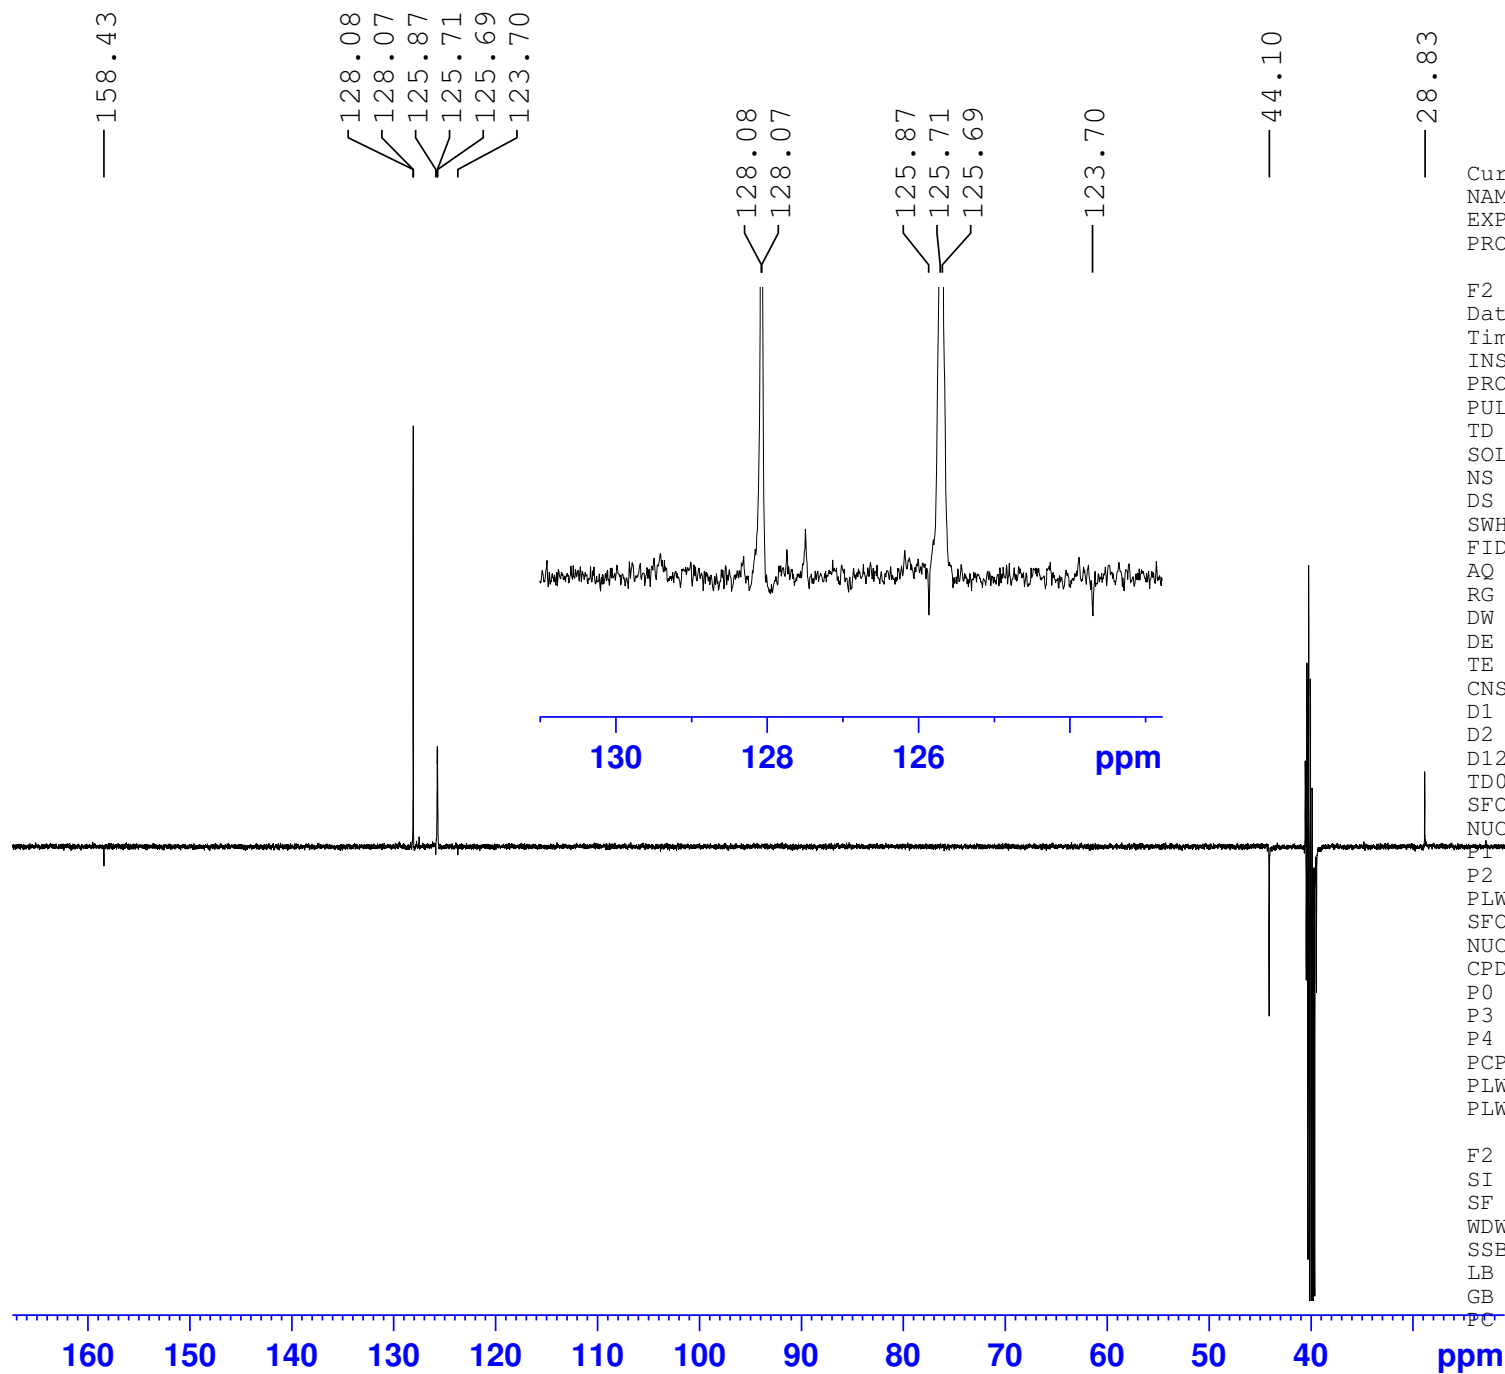

Current Data Parameters  
NAME 36  
EXPNO 3  
PROCNO 1

F2 - Acquisition Parameters  
Date\_ 20180928  
Time 17.03 h  
INSTRUM spect  
PROBHD Z119470\_0187 (  
PULPROG deptq135  
TD 65536  
SOLVENT DMSO  
NS 4764  
DS 8  
SWH 29761.904 Hz  
FIDRES 0.908261 Hz  
AQ 1.1010048 sec  
RG 192.72  
DW 16.800 usec  
DE 6.50 usec  
TE 293.4 K  
CNST2 145.0000000  
D1 2.00000000 sec  
D2 0.00344828 sec  
D12 0.00002000 sec  
TD0 1  
SFO1 125.7829381 MHz  
NUC1 13C  
P1 10.00 usec  
P2 20.00 usec  
PLW1 82.09700012 W  
SFO2 500.1820007 MHz  
NUC2 1H  
CPDPRG[2] waltz16  
P0 15.00 usec  
P3 10.00 usec  
P4 20.00 usec  
PCPD2 80.00 usec  
PLW2 18.10400009 W  
PLW12 0.28288001 W

F2 - Processing parameters  
SI 32768  
SF 125.7703610 MHz  
WDW EM  
SSB 0  
LB 1.00 Hz  
GB 0  
PC 1.40

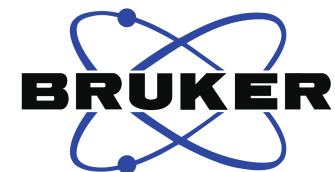

Current Data Parameters  
NAME ARH-14  
EXPNO 1  
PROCNO 1

F2 - Acquisition Parameters  
Date\_ 20190801  
Time 14.40 h  
INSTRUM spect  
PROBHD Z119470\_0187 (  
PULPROG zgfhigqn.2  
TD 131072  
SOLVENT DMSO  
NS 16  
DS 4  
SWH 113636.367 Hz  
FIDRES 1.733953 Hz  
AQ 0.5767168 sec  
RG 11.27  
DW 4.400 usec  
DE 6.50 usec  
TE 293.4 K  
D1 1.00000000 sec  
D11 0.03000000 sec  
D12 0.00002000 sec  
TD0 1  
SFO1 470.5923603 MHz  
NUC1 19F  
P1 16.00 usec  
PLW1 36.93899918 W  
SFO2 500.1820007 MHz  
NUC2 1H  
CPDPRG[2] waltz16  
PCPD2 80.00 usec  
PLW2 18.10400009 W  
PLW12 0.31009001 W

F2 - Processing parameters  
SI 65536  
SF 470.6394242 MHz  
WDW EM  
SSB 0  
LB 0.30 Hz  
GB 0  
PC 1.00

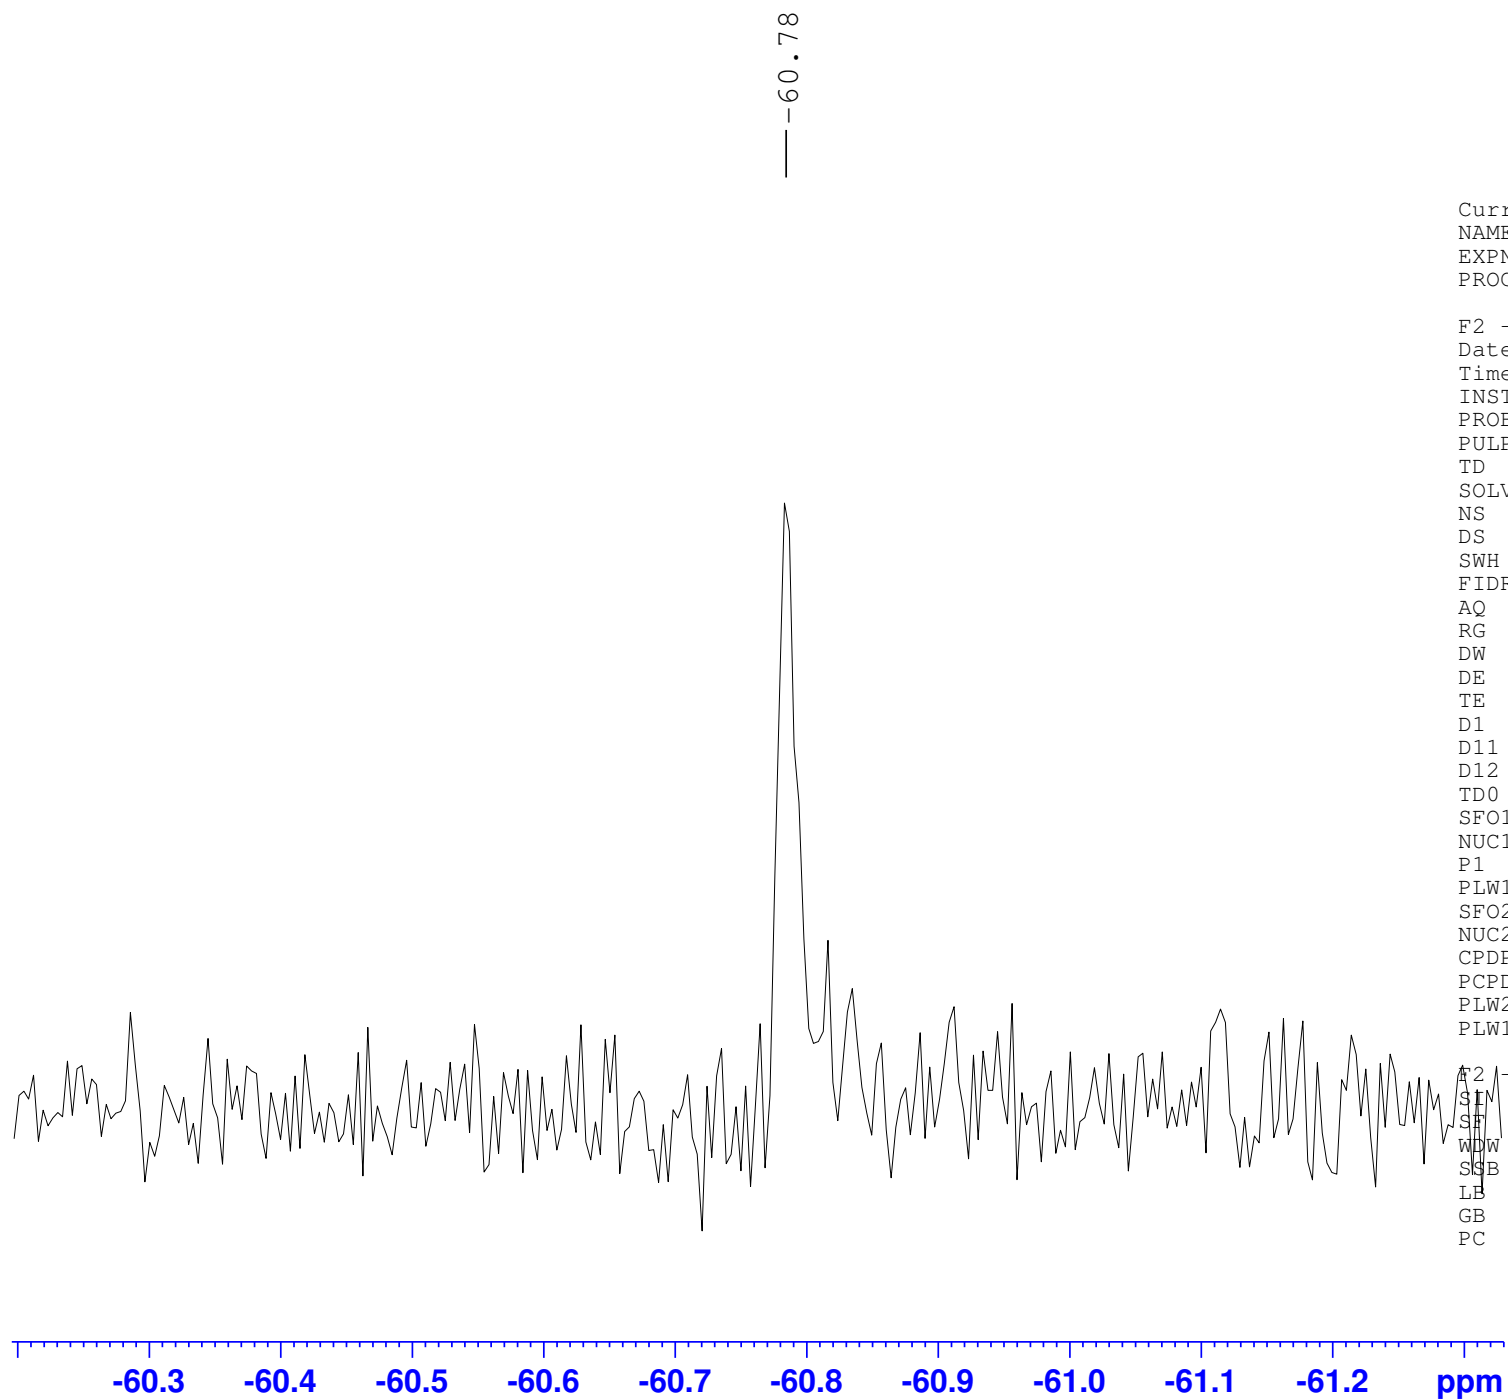

$^{19}\text{F}$  NMR (470 MHz,  $\text{DMSO-d}_6$ ) of **36**

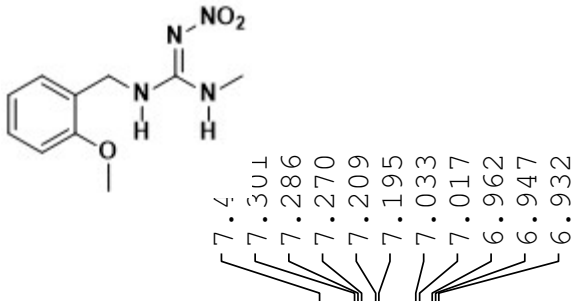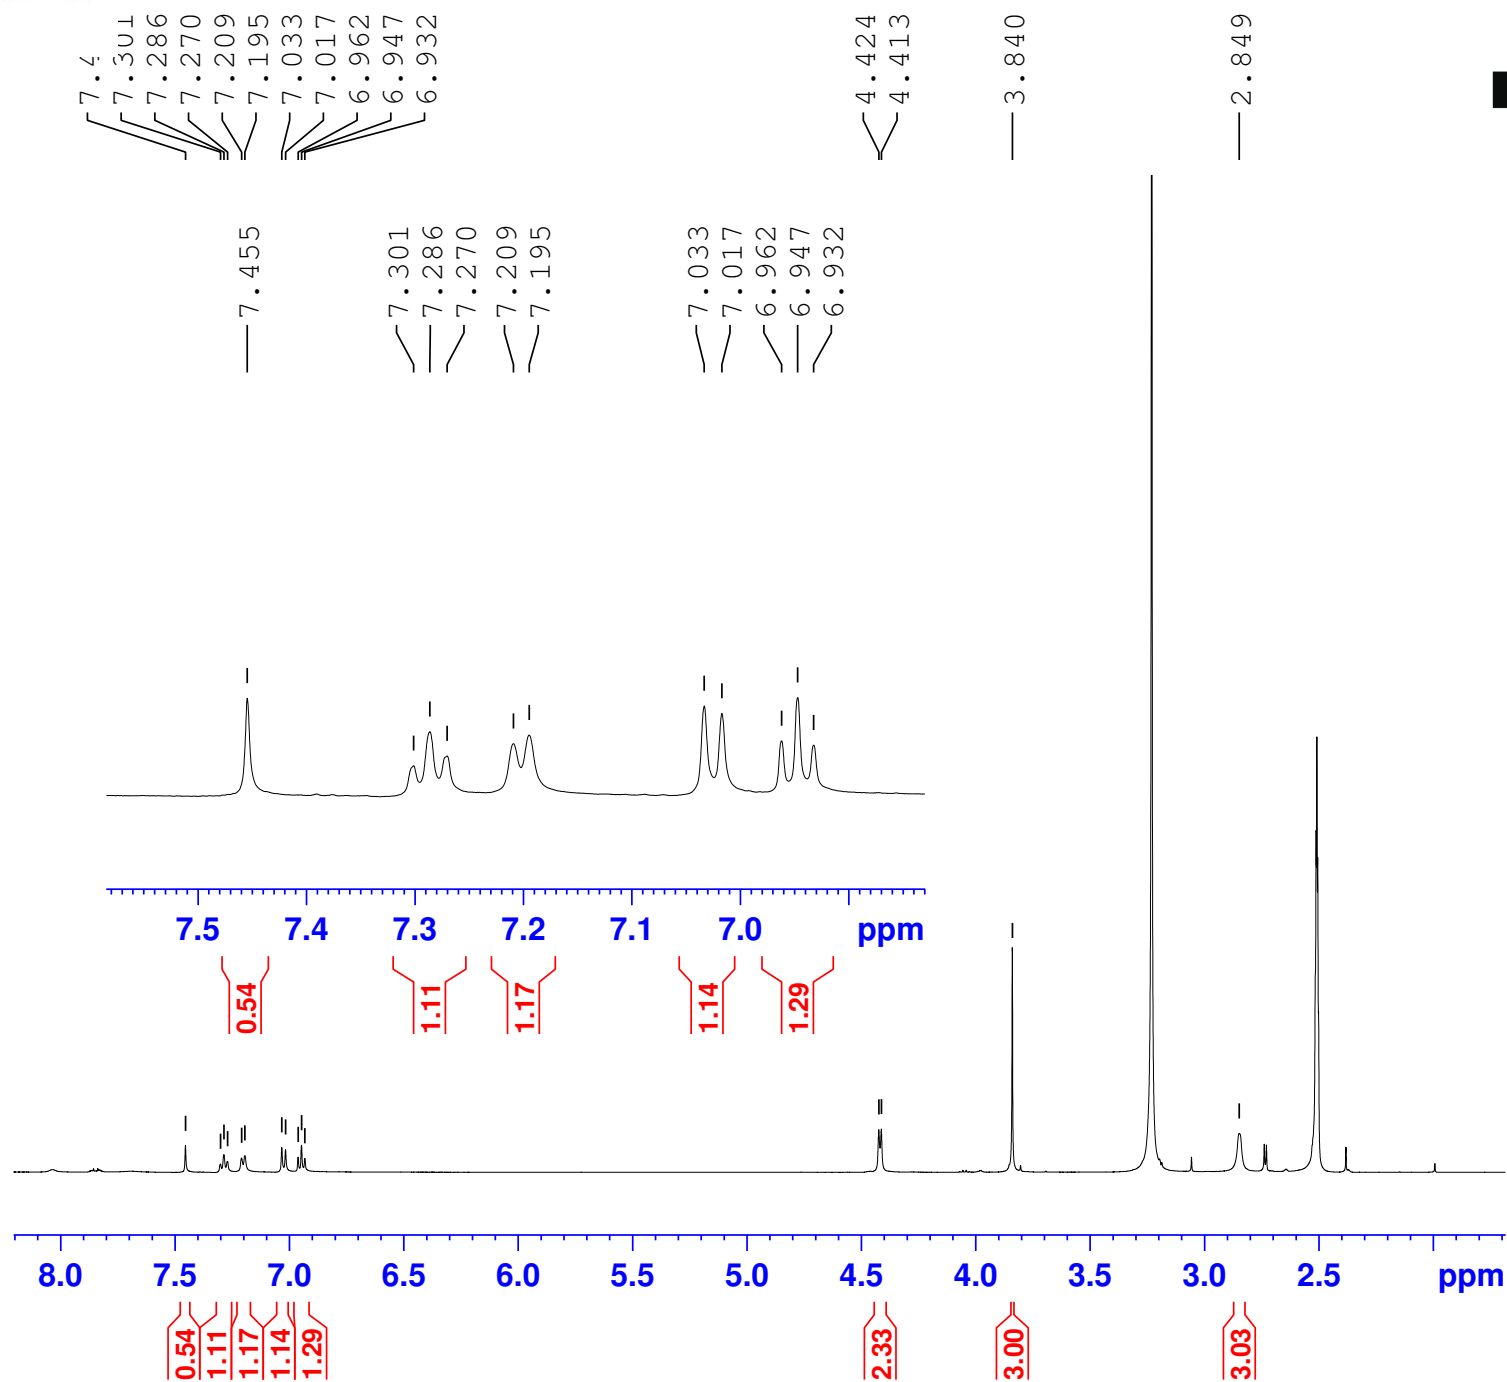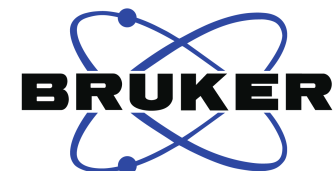

Current Data Parameters  
 NAME 37  
 EXPNO 2  
 PROCNO 1

F2 - Acquisition Parameters  
 Date\_ 20180829  
 Time 18.09 h  
 INSTRUM spect  
 PROBHD z119470\_0187 ( )  
 PULPROG zg30  
 TD 65536  
 SOLVENT DMSO  
 NS 16  
 DS 2  
 SWH 10000.000 Hz  
 FIDRES 0.305176 Hz  
 AQ 3.2767999 sec  
 RG 139.09  
 DW 50.000 usec  
 DE 6.50 usec  
 TE 323.0 K  
 D1 1.00000000 sec  
 TD0 1  
 SFO1 500.1830886 MHz  
 NUC1 1H  
 P0 3.33 usec  
 P1 10.00 usec  
 PLW1 18.10400009 W

F2 - Processing parameters  
 SI 65536  
 SF 500.1800000 MHz  
 WDW EM  
 SSB 0  
 LB 0.30 Hz  
 GB 0  
 PC 1.00

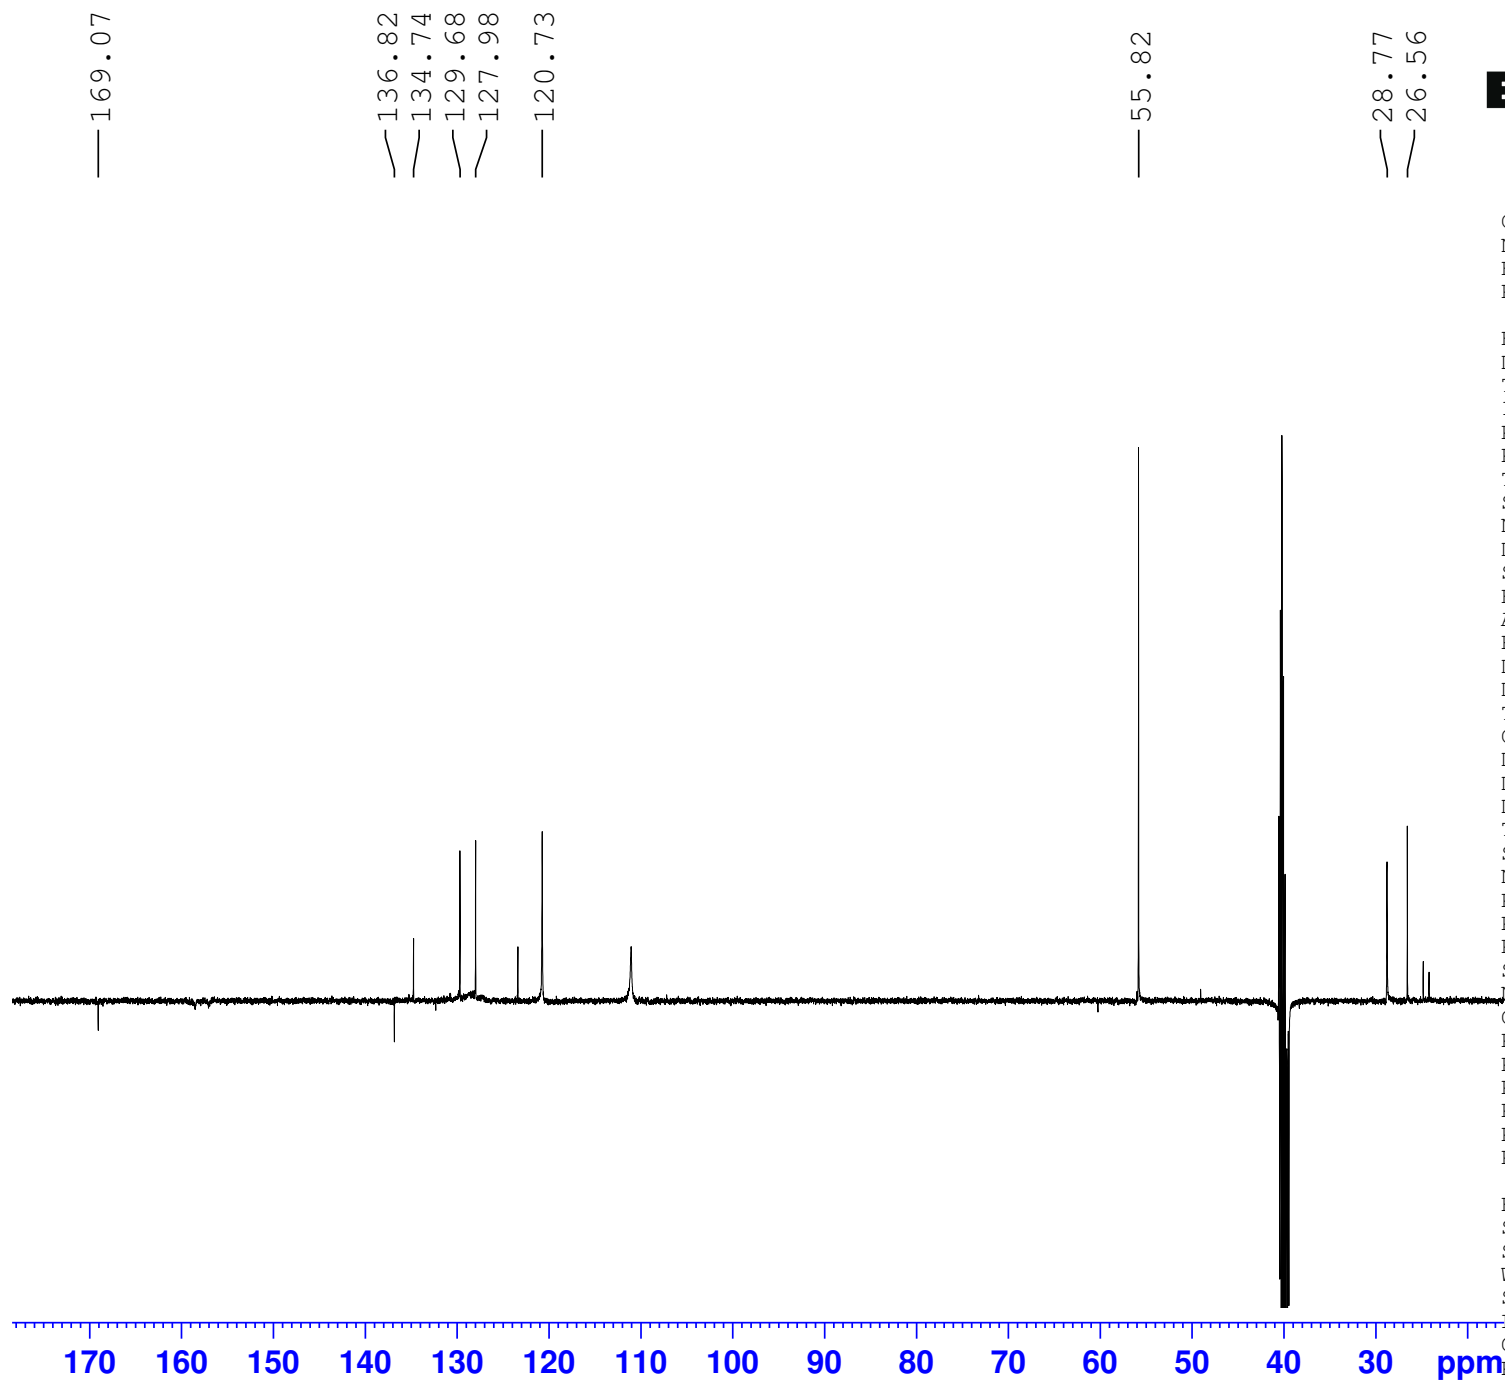

Current Data Parameters  
 NAME 37  
 EXPNO 3  
 PROCNO 1

F2 - Acquisition Parameters  
 Date\_ 20180831  
 Time 10.08 h  
 INSTRUM spect  
 PROBHD z119470\_0187 (  
 PULPROG deptq135  
 TD 65536  
 SOLVENT DMSO  
 NS 16926  
 DS 8  
 SWH 29761.904 Hz  
 FIDRES 0.908261 Hz  
 AQ 1.1010048 sec  
 RG 192.72  
 DW 16.800 usec  
 DE 6.50 usec  
 TE 293.2 K  
 CNST2 145.0000000  
 D1 2.00000000 sec  
 D2 0.00344828 sec  
 D12 0.00002000 sec  
 TD0 1  
 SFO1 125.7829381 MHz  
 NUC1 13C  
 P1 10.00 usec  
 P2 20.00 usec  
 PLW1 82.09700012 W  
 SFO2 500.1820007 MHz  
 NUC2 1H  
 CPDPRG[2] waltz16  
 P0 15.00 usec  
 P3 10.00 usec  
 P4 20.00 usec  
 PCPD2 80.00 usec  
 PLW2 18.10400009 W  
 PLW12 0.28288001 W

F2 - Processing parameters  
 SI 32768  
 SF 125.7703610 MHz  
 WDW EM  
 SSB 0  
 LB 1.00 Hz  
 GB 0  
 PC 1.40

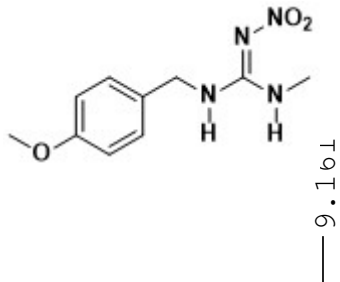

— 7.768  
 < 7.251  
 < 7.235  
 < 6.919  
 < 6.902

< 4.356  
 < 4.347  
 — 3.735  
 — 2.826

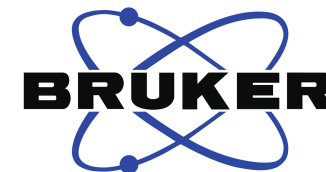

Current Data Parameters  
 NAME 38  
 EXPNO 1  
 PROCNO 1

F2 - Acquisition Parameters  
 Date\_ 20181205  
 Time 10.53 h  
 INSTRUM spect  
 PROBHD Z119470\_0187 (  
 PULPROG zg30  
 TD 65536  
 SOLVENT DMSO  
 NS 16  
 DS 2  
 SWH 10000.000 Hz  
 FIDRES 0.305176 Hz  
 AQ 3.2767999 sec  
 RG 70.58  
 DW 50.000 usec  
 DE 6.50 usec  
 TE 291.1 K  
 D1 1.00000000 sec  
 TD0 1  
 SFO1 500.1830886 MHz  
 NUC1 1H  
 P0 3.33 usec  
 P1 10.00 usec  
 PLW1 18.10400009 W

F2 - Processing parameters  
 SI 65536  
 SF 500.1800000 MHz  
 WDW EM  
 SSB 0  
 LB 0.30 Hz  
 GB 0  
 PC 1.00

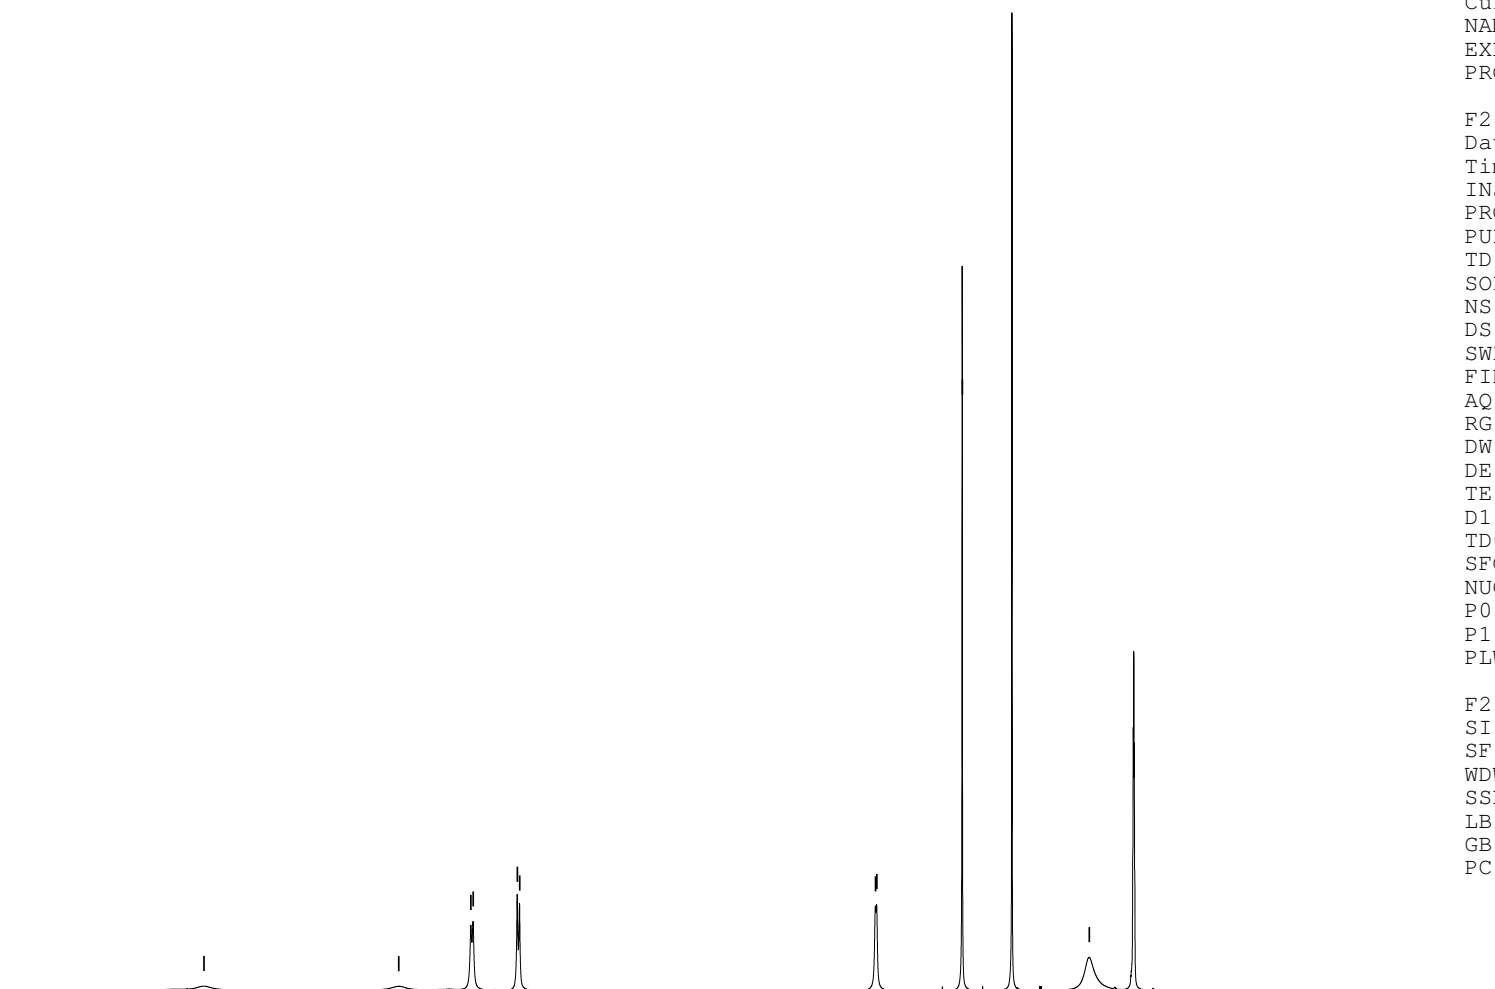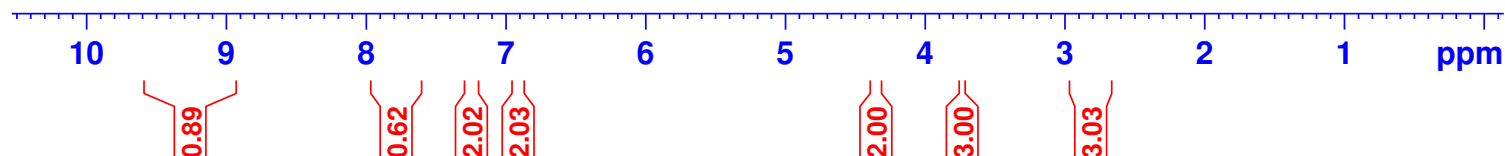

<sup>1</sup>H NMR (500 MHz, DMSO-d<sub>6</sub>, 50°C of **38**)

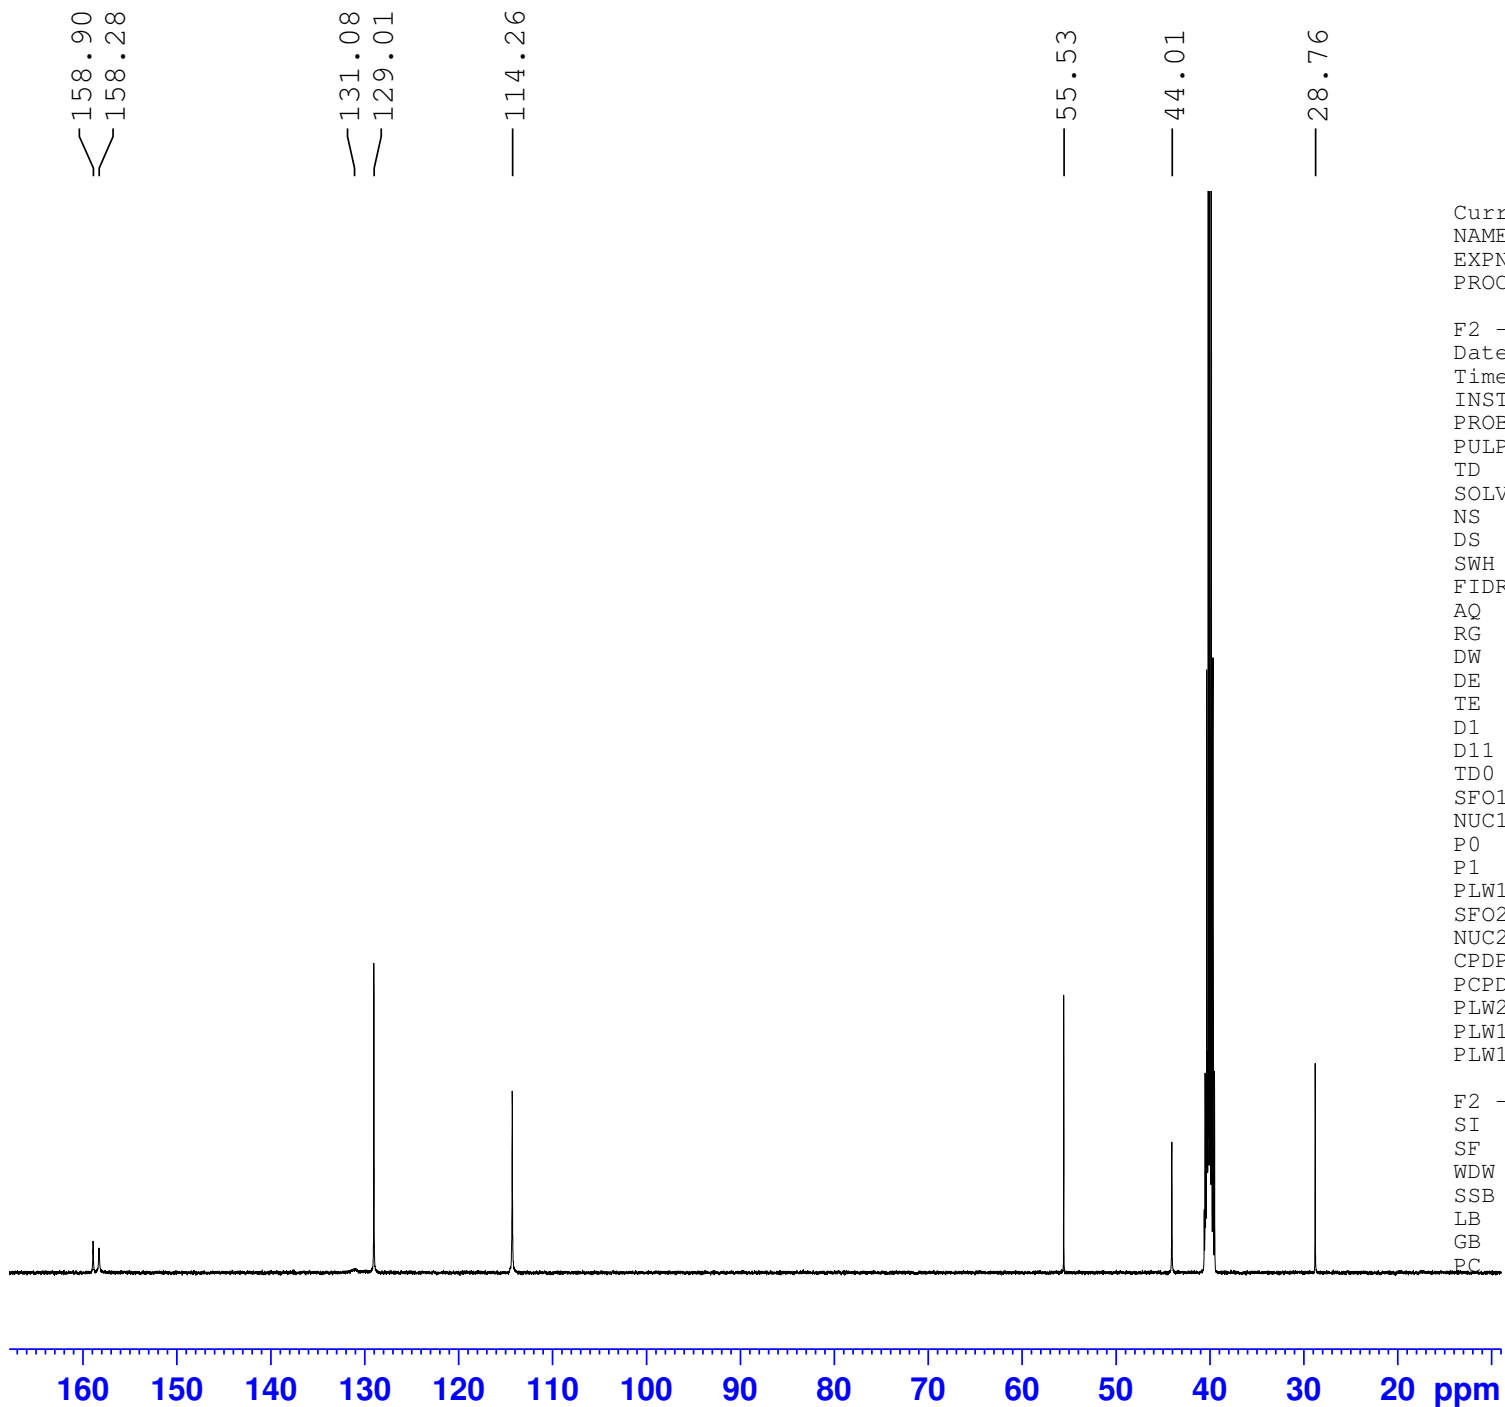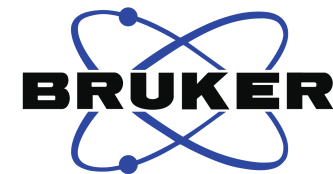

Current Data Parameters  
NAME 38  
EXPNO 3  
PROCNO 1

F2 - Acquisition Parameters  
Date\_ 20181205  
Time 12.54 h  
INSTRUM spect  
PROBHD Z119470\_0187 (  
PULPROG zgpg30  
TD 65536  
SOLVENT DMSO  
NS 1973  
DS 8  
SWH 29761.904 Hz  
FIDRES 0.908261 Hz  
AQ 1.1010048 sec  
RG 192.72  
DW 16.800 usec  
DE 6.50 usec  
TE 291.6 K  
D1 2.00000000 sec  
D11 0.03000000 sec  
TD0 1  
SFO1 125.7829381 MHz  
NUC1 13C  
P0 3.33 usec  
P1 10.00 usec  
PLW1 82.09700012 W  
SFO2 500.1820007 MHz  
NUC2 1H  
CPDPRG[2] waltz65  
PCPD2 80.00 usec  
PLW2 18.10400009 W  
PLW12 0.28288001 W  
PLW13 0.14228000 W

F2 - Processing parameters  
SI 32768  
SF 125.7703610 MHz  
WDW EM  
SSB 0  
LB 1.00 Hz  
GB 0  
PC 1.40



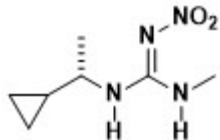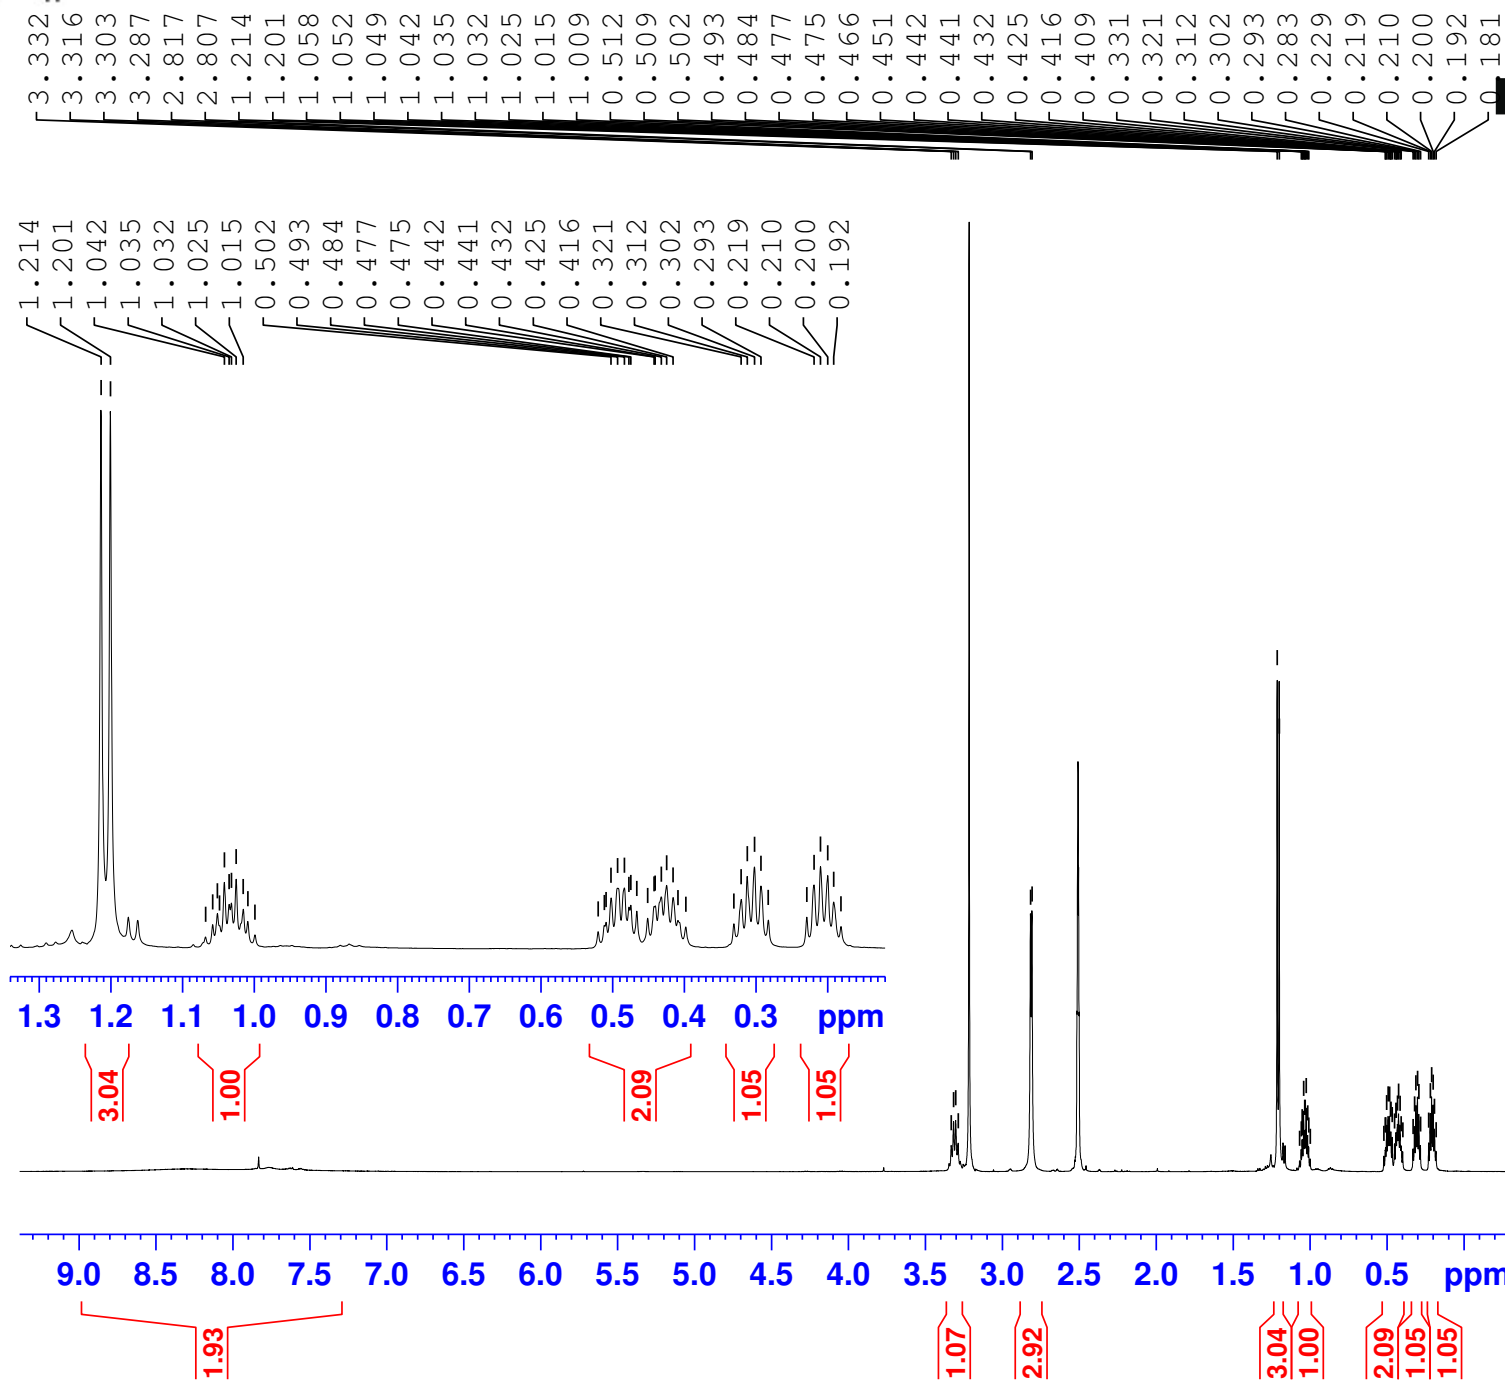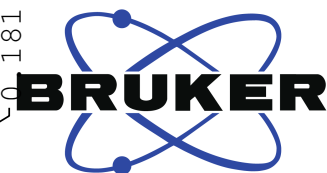

Current Data Parameters  
 NAME S-39  
 EXPNO 2  
 PROCNO 1

F2 - Acquisition Parameters  
 Date\_ 20180905  
 Time 17.57 h  
 INSTRUM spect  
 PROBHD Z119470\_0187 (zg30)  
 PULPROG zg30  
 TD 65536  
 SOLVENT DMSO  
 NS 5  
 DS 1  
 SWH 10000.000 Hz  
 FIDRES 0.305176 Hz  
 AQ 3.276799 sec  
 RG 77.78  
 DW 50.000 usec  
 DE 6.50 usec  
 TE 323.2 K  
 D1 1.00000000 sec  
 TD0 1  
 SFO1 500.1830886 MHz  
 NUC1 1H  
 P0 3.33 usec  
 P1 10.00 usec  
 PLW1 18.10400009 W

F2 - Processing parameters  
 SI 65536  
 SF 500.1800000 MHz  
 WDW EM  
 SSB 0  
 LB 0.30 Hz  
 GB 0  
 PC 1.00

<sup>1</sup>H NMR (500 MHz, DMSO-d<sub>6</sub>, 50°C) of S-39

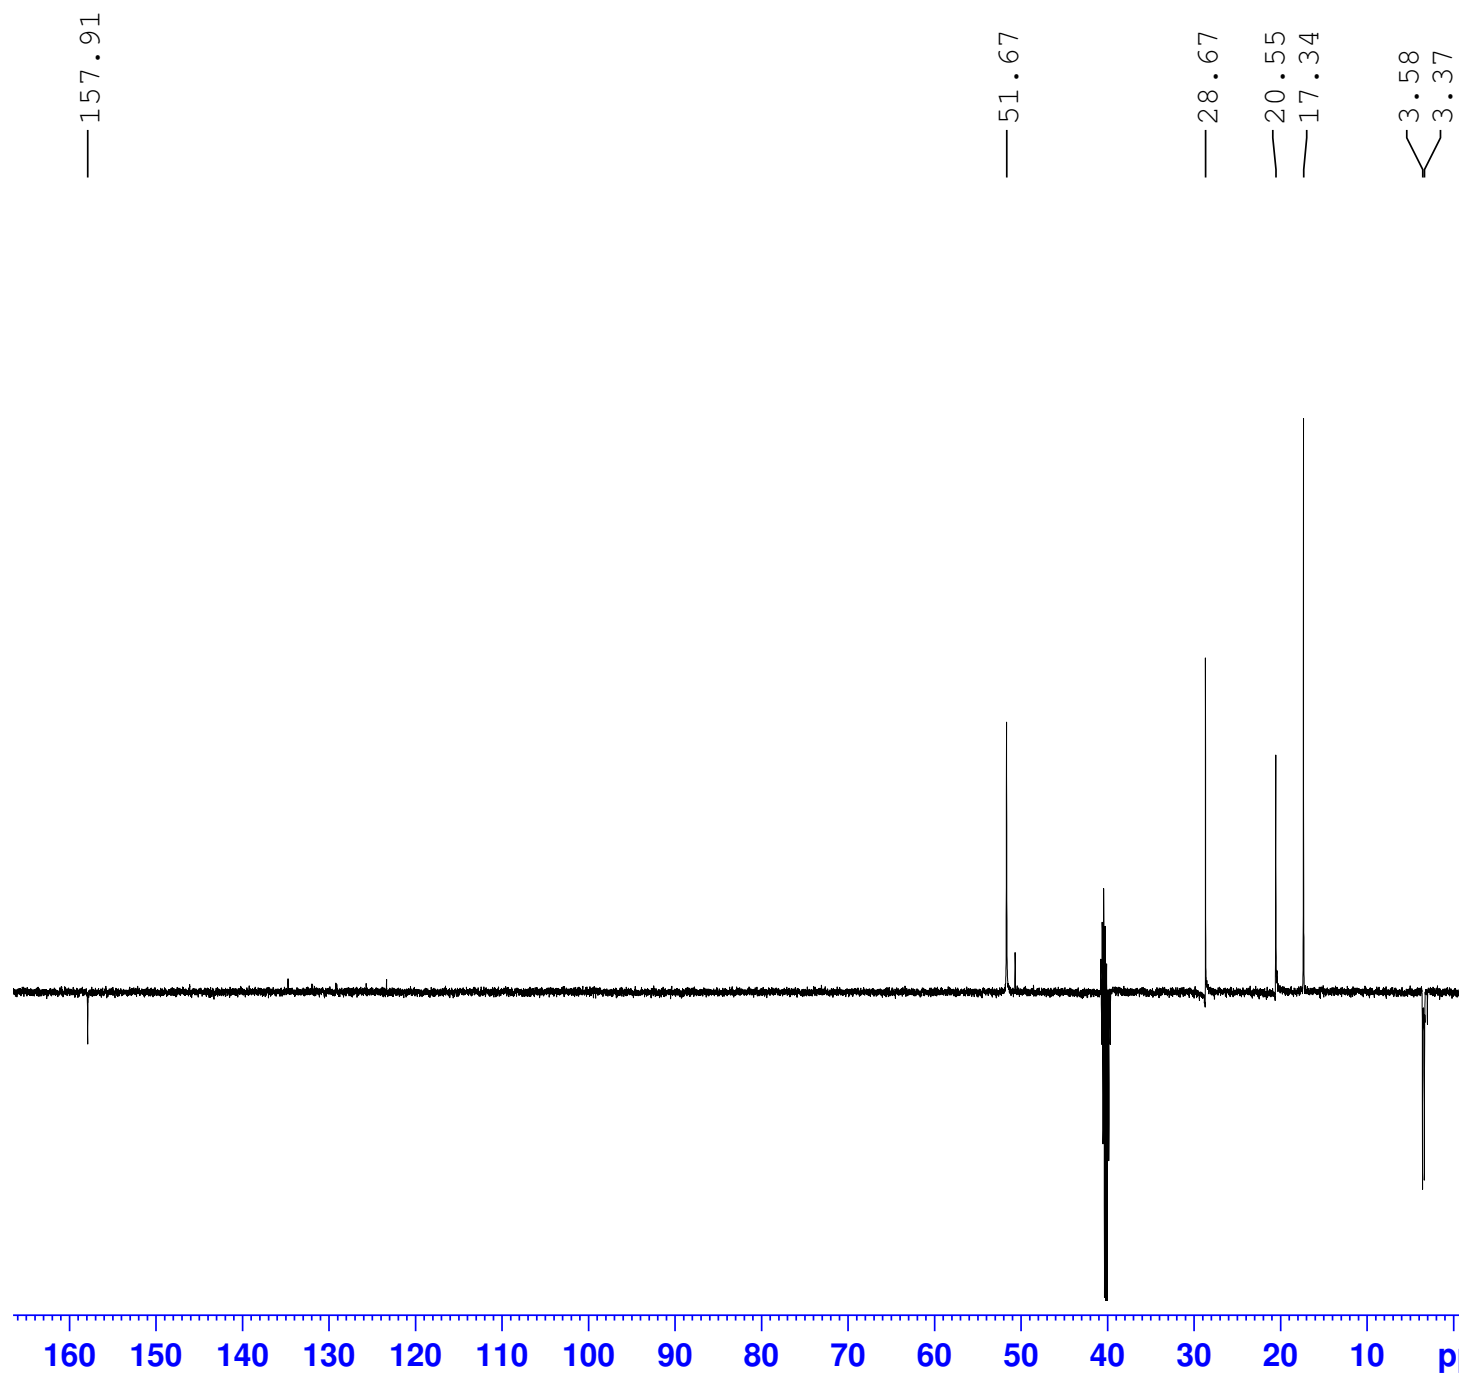

Current Data Parameters  
 NAME S-39  
 EXPNO 4  
 PROCNO 1

F2 - Acquisition Parameters  
 Date\_ 20180906  
 Time 11.34 h  
 INSTRUM spect  
 PROBHD Z119470\_0187 (  
 PULPROG deptq135  
 TD 65536  
 SOLVENT DMSO  
 NS 1087  
 DS 8  
 SWH 29761.904 Hz  
 FIDRES 0.908261 Hz  
 AQ 1.1010048 sec  
 RG 192.72  
 DW 16.800 usec  
 DE 6.50 usec  
 TE 323.3 K  
 CNST2 145.0000000  
 D1 2.00000000 sec  
 D2 0.00344828 sec  
 D12 0.00002000 sec  
 TD0 1  
 SFO1 125.7829381 MHz  
 NUC1 13C  
 P1 10.00 usec  
 P2 20.00 usec  
 PLW1 82.09700012 W  
 SFO2 500.1820007 MHz  
 NUC2 1H  
 CPDPRG[2] waltz16  
 P0 15.00 usec  
 P3 10.00 usec  
 P4 20.00 usec  
 PCPD2 80.00 usec  
 PLW2 18.10400009 W  
 PLW12 0.28288001 W

F2 - Processing parameters  
 SI 32768  
 SF 125.7703610 MHz  
 WDW EM  
 SSB 0  
 LB 1.00 Hz  
 GB 0  
 PC 140

<sup>13</sup>C (DEPTQ135) NMR (125 MHz, DMSO-d<sub>6</sub>, 50°C) of **S-39**

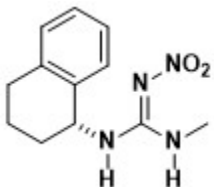

— 8.806

7.220  
7.191  
7.140  
7.128

— 5.051

2.861  
2.825  
2.804  
2.789  
2.776  
2.766  
2.755  
2.745  
2.722  
2.012  
2.004  
1.905  
1.862  
1.841  
1.821  
1.800

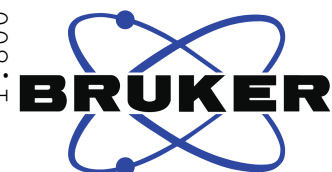

Current Data Parameters  
NAME S-40  
EXPNO 2  
PROCNO 1

F2 - Acquisition Parameters  
Date\_ 20180920  
Time 10.42 h  
INSTRUM spect  
PROBHD Z119470\_0187 (  
PULPROG zg30  
TD 65536  
SOLVENT DMSO  
NS 16  
DS 2  
SWH 10000.000 Hz  
FIDRES 0.305176 Hz  
AQ 3.2767999 sec  
RG 77.78  
DW 50.000 usec  
DE 6.50 usec  
TE 323.0 K  
D1 1.00000000 sec  
TD0 1  
SFO1 500.1830886 MHz  
NUC1 1H  
P0 3.33 usec  
P1 10.00 usec  
PLW1 18.10400009 W

F2 - Processing parameters  
SI 65536  
SF 500.1800000 MHz  
WDW EM  
SSB 0  
LB 0.30 Hz  
GB 0  
PC 1.00

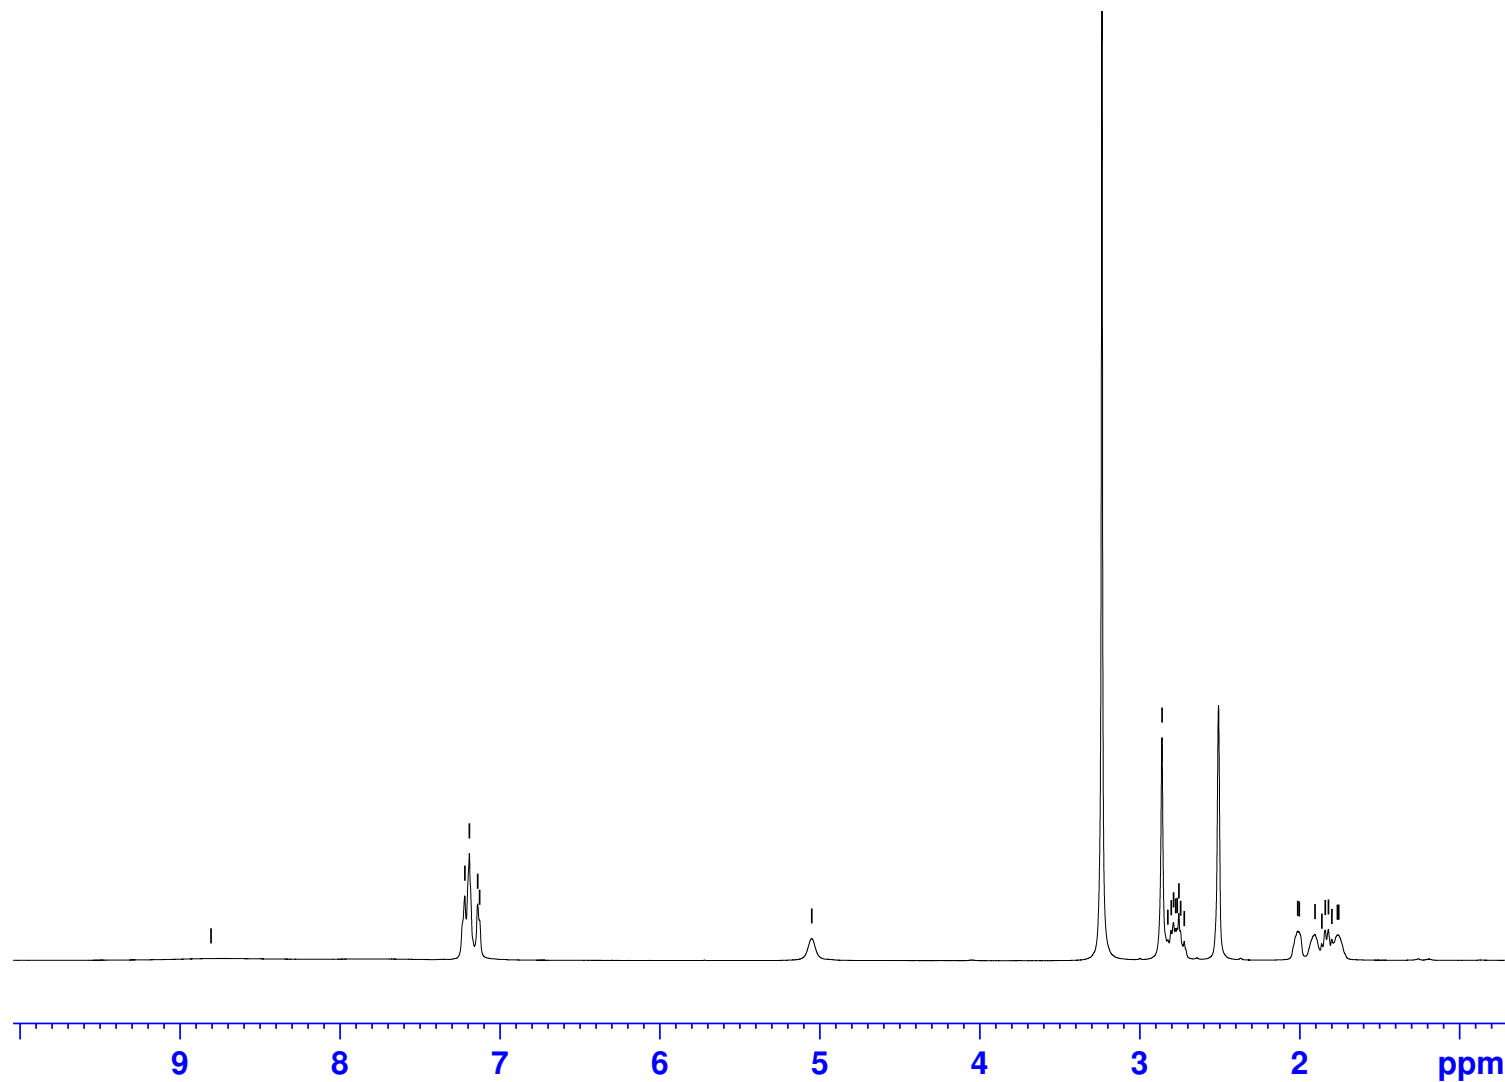

<sup>1</sup>H NMR (500 MHz, DMSO-d<sub>6</sub>, 50°C) of **S-40**

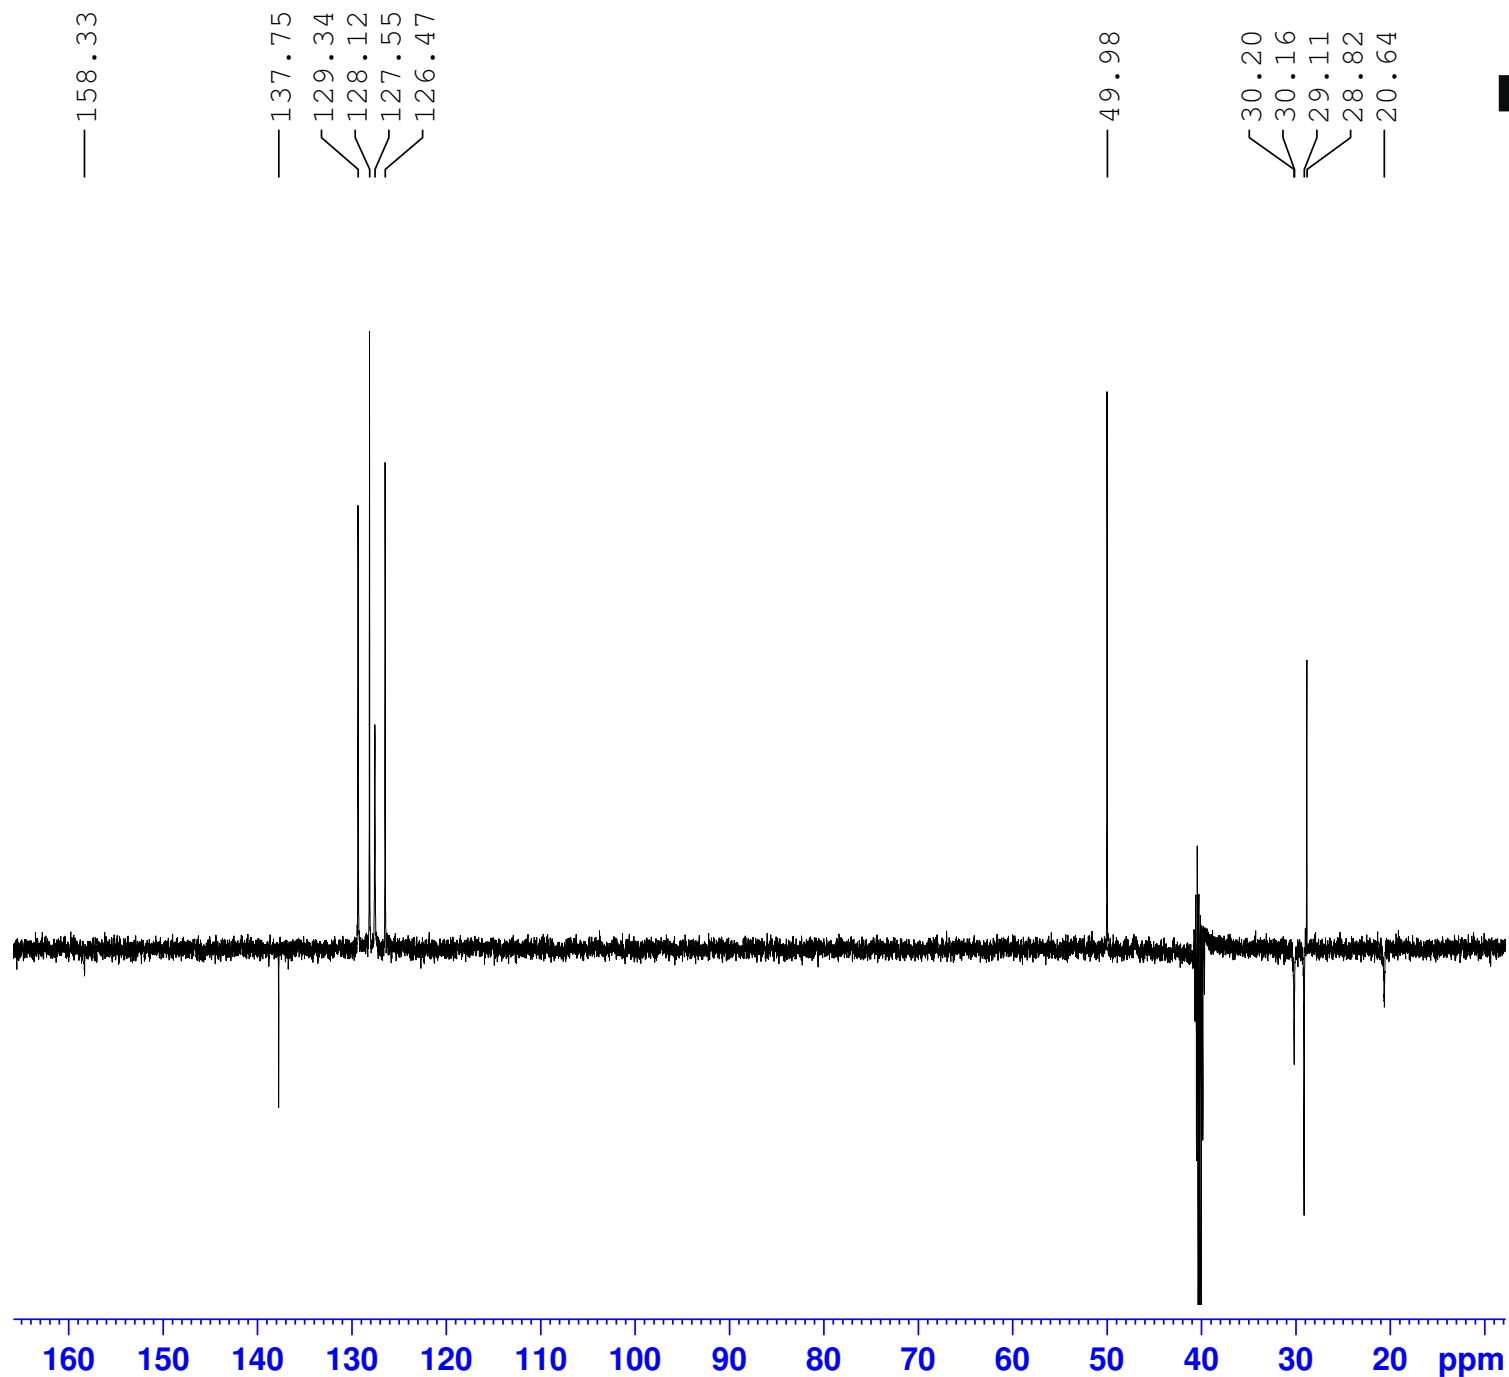

Current Data Parameters  
 NAME S-40  
 EXPNO 3  
 PROCNO 1

F2 - Acquisition Parameters  
 Date\_ 20180920  
 Time 10.59 h  
 INSTRUM spect  
 PROBHD z119470\_0187 (  
 PULPROG deptq135  
 TD 65536  
 SOLVENT DMSO  
 NS 256  
 DS 8  
 SWH 29761.904 Hz  
 FIDRES 0.908261 Hz  
 AQ 1.1010048 sec  
 RG 192.72  
 DW 16.800 usec  
 DE 6.50 usec  
 TE 323.2 K  
 CNST2 145.0000000  
 D1 2.00000000 sec  
 D2 0.00344828 sec  
 D12 0.00002000 sec  
 TD0 1  
 SFO1 125.7829381 MHz  
 NUC1 13C  
 P1 10.00 usec  
 P2 20.00 usec  
 PLW1 82.09700012 W  
 SFO2 500.1820007 MHz  
 NUC2 1H  
 CPDPRG[2] waltz16  
 P0 15.00 usec  
 P3 10.00 usec  
 P4 20.00 usec  
 PCPD2 80.00 usec  
 PLW2 18.10400009 W  
 PLW12 0.28288001 W

F2 - Processing parameters  
 SI 32768  
 SF 125.7703610 MHz  
 WDW EM  
 SSB 0  
 LB 1.00 Hz  
 GB 0  
 PC 791.40

<sup>13</sup>C (DEPTQ135) NMR (125 MHz, DMSO-d<sub>6</sub>, 50°C) of **S-40**

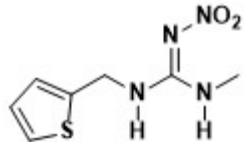

— 9.180

7.920  
7.914  
7.909  
7.903  
7.423  
7.415  
7.031  
6.982  
6.973  
6.966

— 4.573

— 2.815



Current Data Parameters  
NAME 41  
EXPNO 1  
PROCNO 1

F2 - Acquisition Parameters  
Date\_ 20181008  
Time 18.53 h  
INSTRUM spect  
PROBHD Z119470\_0187 (  
PULPROG zg30  
TD 65536  
SOLVENT DMSO  
NS 5  
DS 2  
SWH 10000.000 Hz  
FIDRES 0.305176 Hz  
AQ 3.2767999 sec  
RG 62.71  
DW 50.000 usec  
DE 6.50 usec  
TE 291.7 K  
D1 1.00000000 sec  
TD0 1  
SFO1 500.1830886 MHz  
NUC1 1H  
P0 3.33 usec  
P1 10.00 usec  
PLW1 18.10400009 W

F2 - Processing parameters  
SI 65536  
SF 500.180000 MHz  
WDW EM  
SSB 0  
LB 0.30 Hz  
GB 0  
PC 1.00

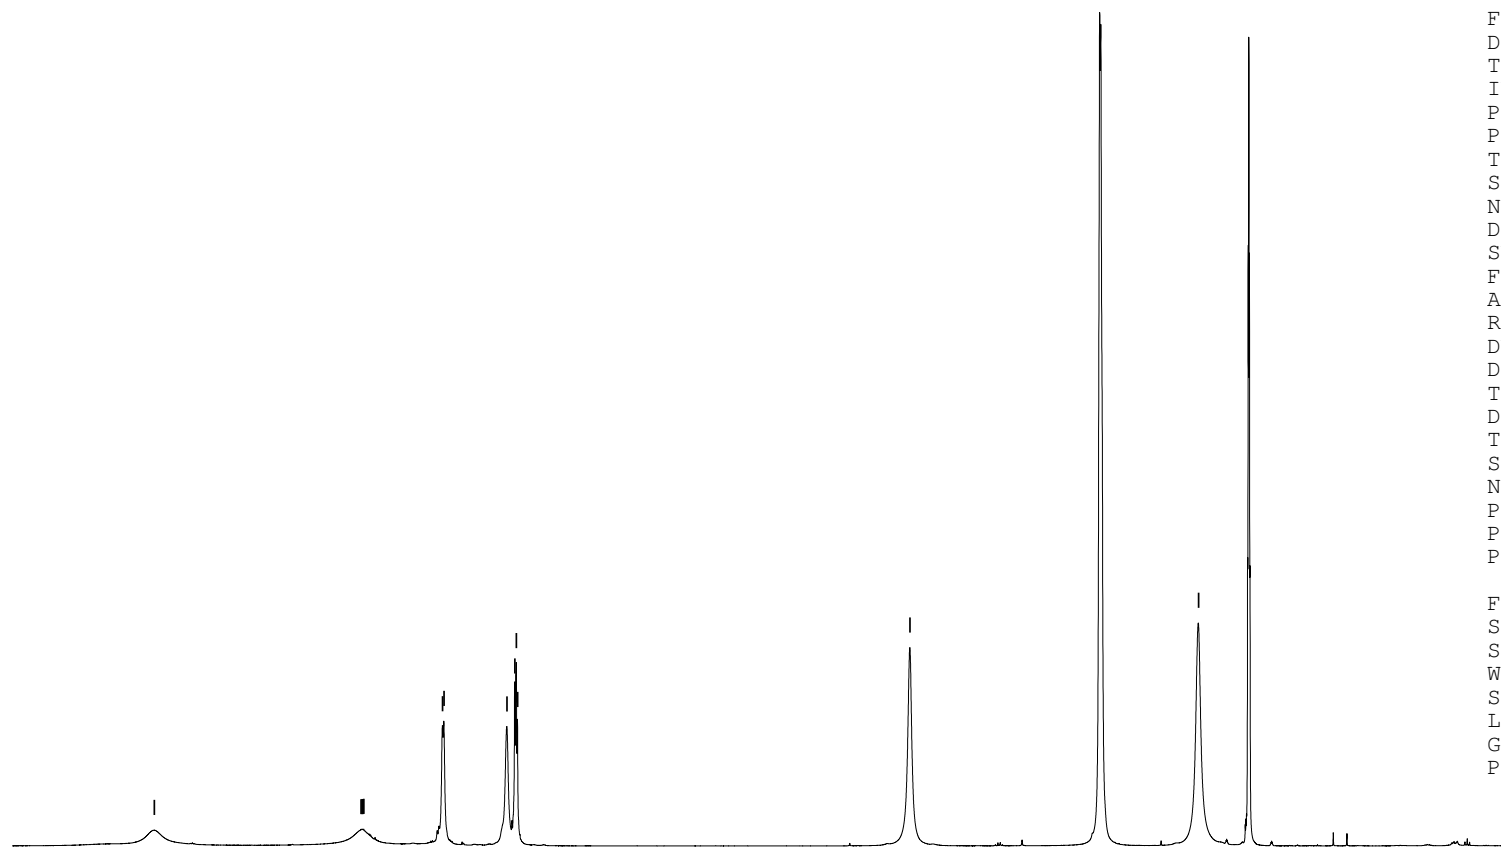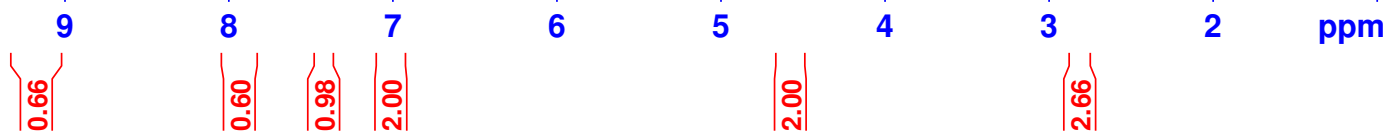

<sup>1</sup>H NMR (500 MHz, DMSO-d<sub>6</sub>) of 41

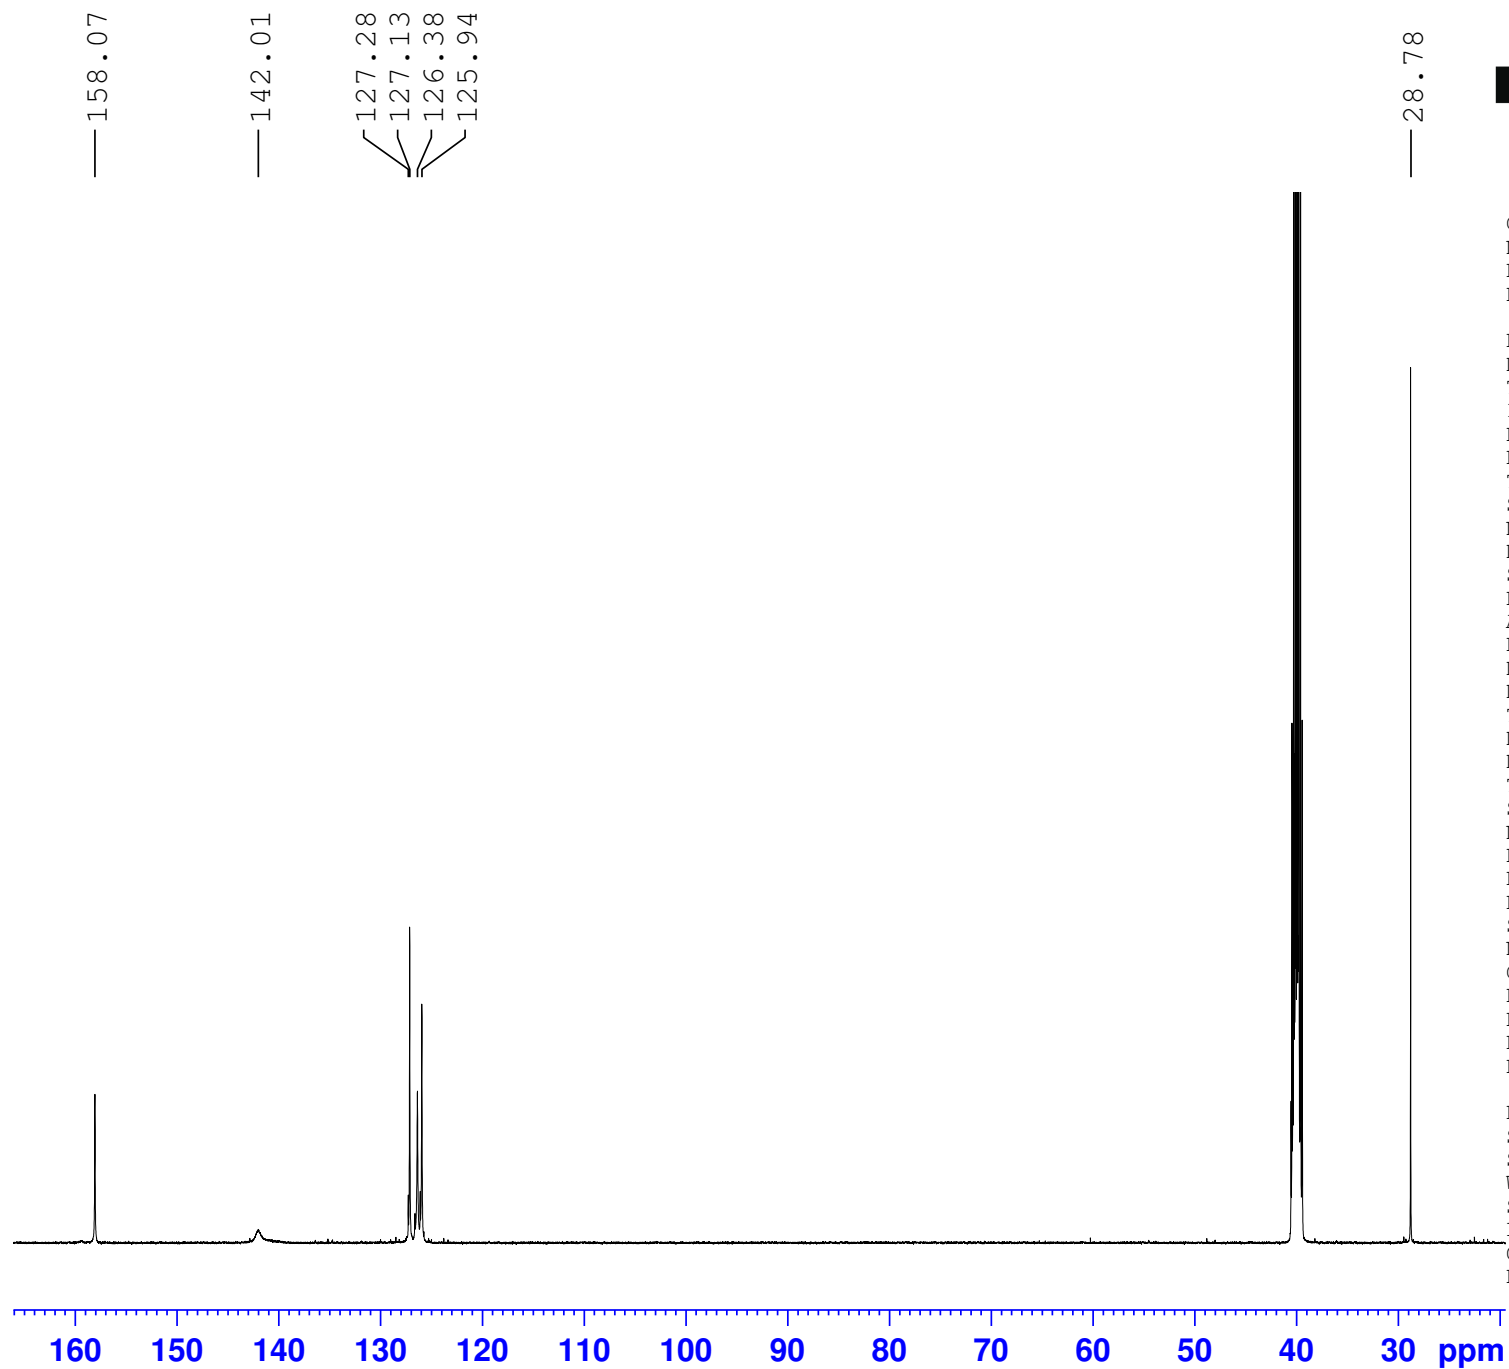

Current Data Parameters  
 NAME 41  
 EXPNO 3  
 PROCNO 1

F2 - Acquisition Parameters  
 Date\_ 20181016  
 Time 21.44 h  
 INSTRUM spect  
 PROBHD Z119470\_0187 (  
 PULPROG zgpg30  
 TD 65536  
 SOLVENT DMSO  
 NS 30720  
 DS 8  
 SWH 29761.904 Hz  
 FIDRES 0.908261 Hz  
 AQ 1.1010048 sec  
 RG 192.72  
 DW 16.800 usec  
 DE 6.50 usec  
 TE 292.7 K  
 D1 2.00000000 sec  
 D11 0.03000000 sec  
 TD0 1  
 SFO1 125.7829381 MHz  
 NUC1 13C  
 P0 3.33 usec  
 P1 10.00 usec  
 PLW1 82.09700012 W  
 SFO2 500.1820007 MHz  
 NUC2 1H  
 CPDPRG[2] waltz65  
 PCPD2 80.00 usec  
 PLW2 18.10400009 W  
 PLW12 0.28288001 W  
 PLW13 0.14228000 W

F2 - Processing parameters  
 SI 32768  
 SF 125.7703610 MHz  
 WDW EM  
 SSB 0  
 LB 1.00 Hz  
 GB 0  
 PC 1.40

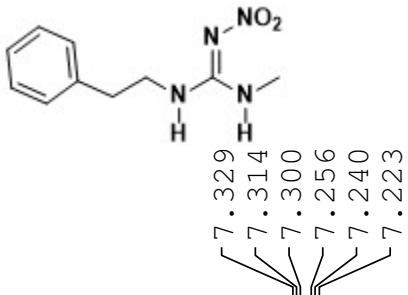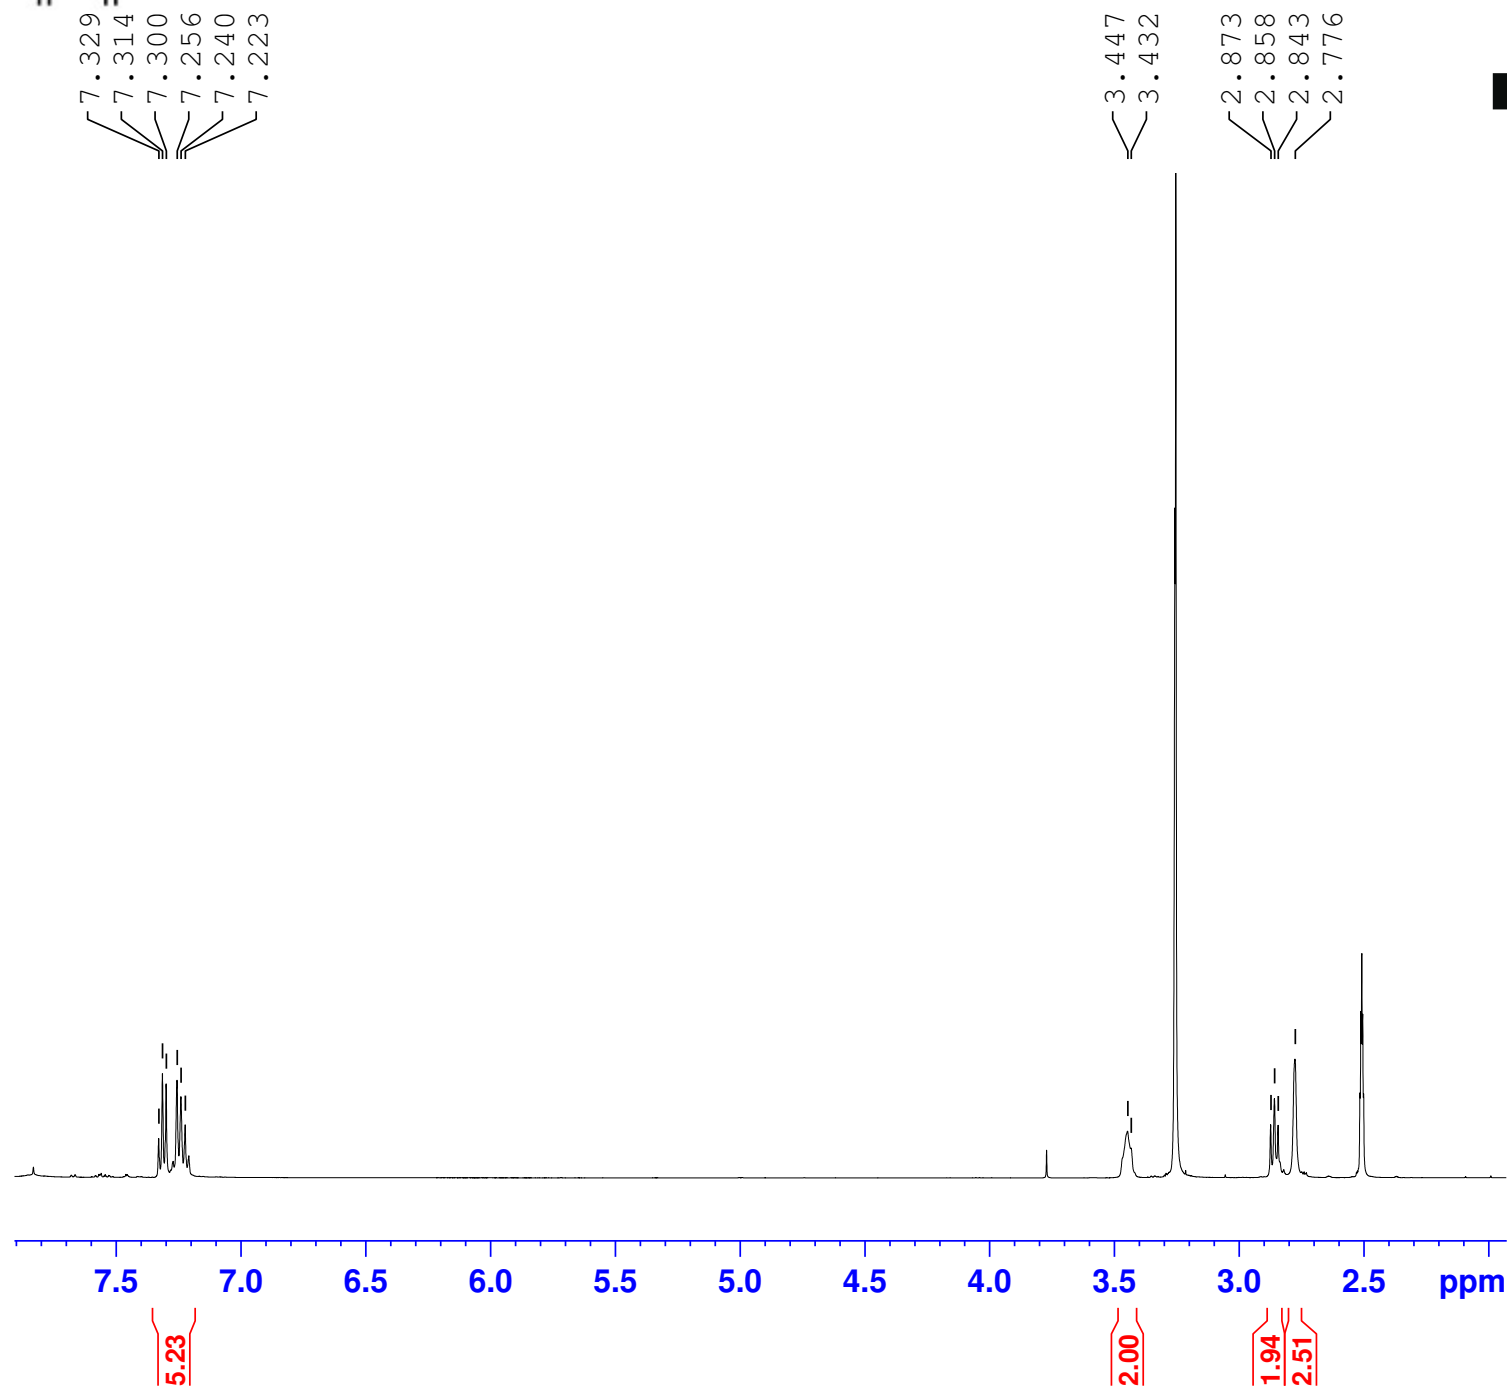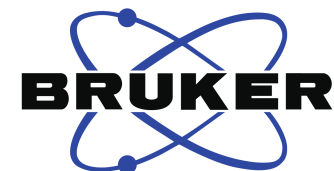

Current Data Parameters  
 NAME 42  
 EXPNO 1  
 PROCNO 1

F2 - Acquisition Parameters  
 Date\_ 20180920  
 Time 11.05 h  
 INSTRUM spect  
 PROBHD Z119470\_0187 (  
 PULPROG zg30  
 TD 65536  
 SOLVENT DMSO  
 NS 5  
 DS 1  
 SWH 10000.000 Hz  
 FIDRES 0.305176 Hz  
 AQ 3.2767999 sec  
 RG 77.78  
 DW 50.000 usec  
 DE 6.50 usec  
 TE 323.0 K  
 D1 1.00000000 sec  
 TD0 1  
 SFO1 500.1830886 MHz  
 NUC1 1H  
 P0 3.33 usec  
 P1 10.00 usec  
 PLW1 18.10400009 W

F2 - Processing parameters  
 SI 65536  
 SF 500.1800000 MHz  
 WDW EM  
 SSB 0  
 LB 0.30 Hz  
 GB 0  
 PC 1.00

<sup>1</sup>H NMR (500 MHz, DMSO-d<sub>6</sub>) of 42

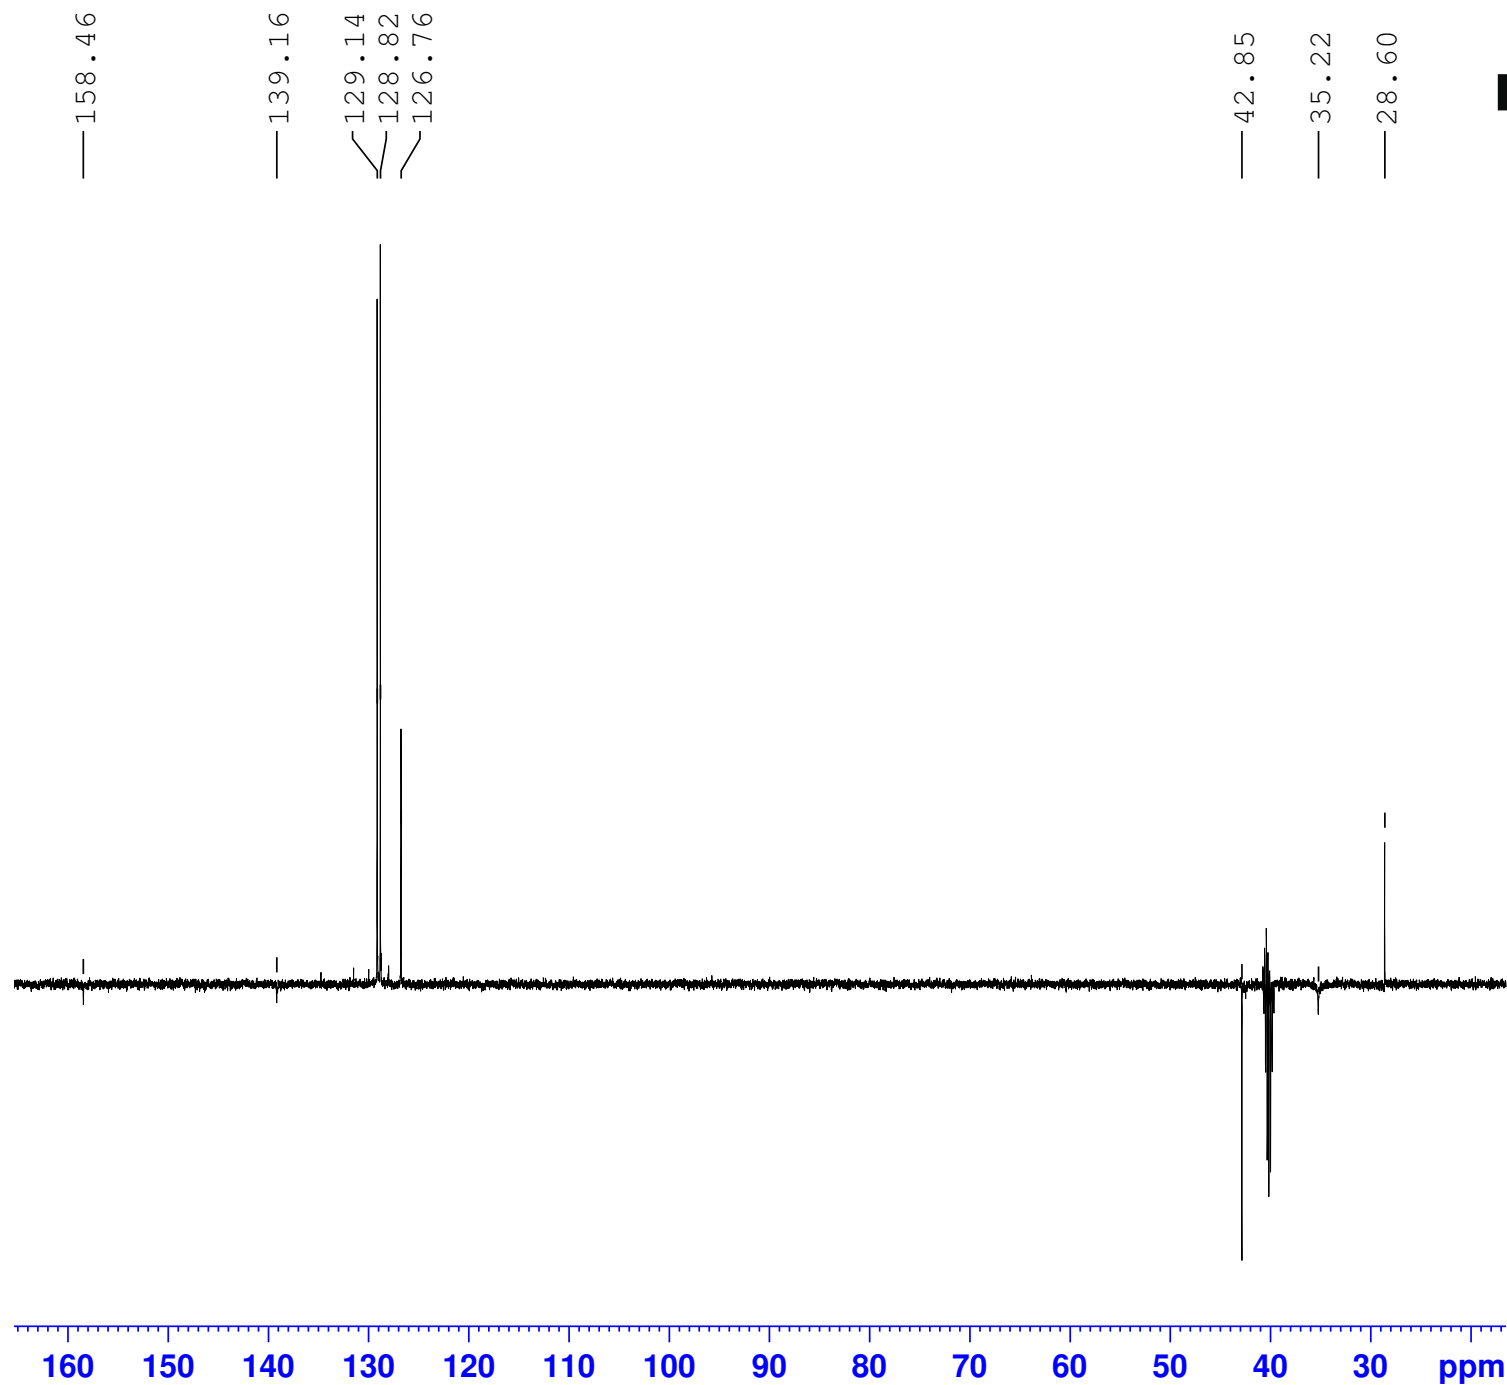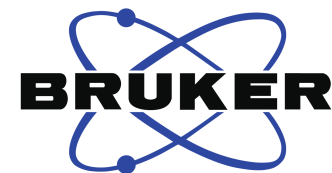

Current Data Parameters  
 NAME 42  
 EXPNO 2  
 PROCNO 1

F2 - Acquisition Parameters  
 Date\_ 20180920  
 Time 11.15 h  
 INSTRUM spect  
 PROBHD Z119470\_0187 (  
 PULPROG deptq135  
 TD 65536  
 SOLVENT DMSO  
 NS 156  
 DS 8  
 SWH 29761.904 Hz  
 FIDRES 0.908261 Hz  
 AQ 1.1010048 sec  
 RG 192.72  
 DW 16.800 usec  
 DE 6.50 usec  
 TE 323.1 K  
 CNST2 145.0000000  
 D1 2.00000000 sec  
 D2 0.00344828 sec  
 D12 0.00002000 sec  
 TD0 1  
 SFO1 125.7829381 MHz  
 NUC1 13C  
 P1 10.00 usec  
 P2 20.00 usec  
 PLW1 82.09700012 W  
 SFO2 500.1820007 MHz  
 NUC2 1H  
 CPDPRG[2] waltz16  
 P0 15.00 usec  
 P3 10.00 usec  
 P4 20.00 usec  
 PCPD2 80.00 usec  
 PLW2 18.10400009 W  
 PLW12 0.28288001 W

F2 - Processing parameters  
 SI 32768  
 SF 125.7703610 MHz  
 WDW EM  
 SSB 0  
 LB 1.00 Hz  
 GB 0  
 PC 1.40



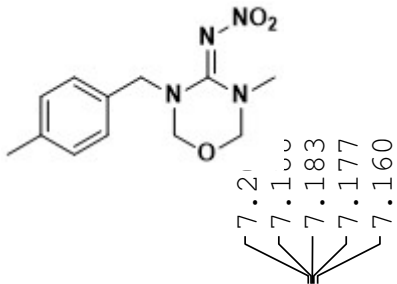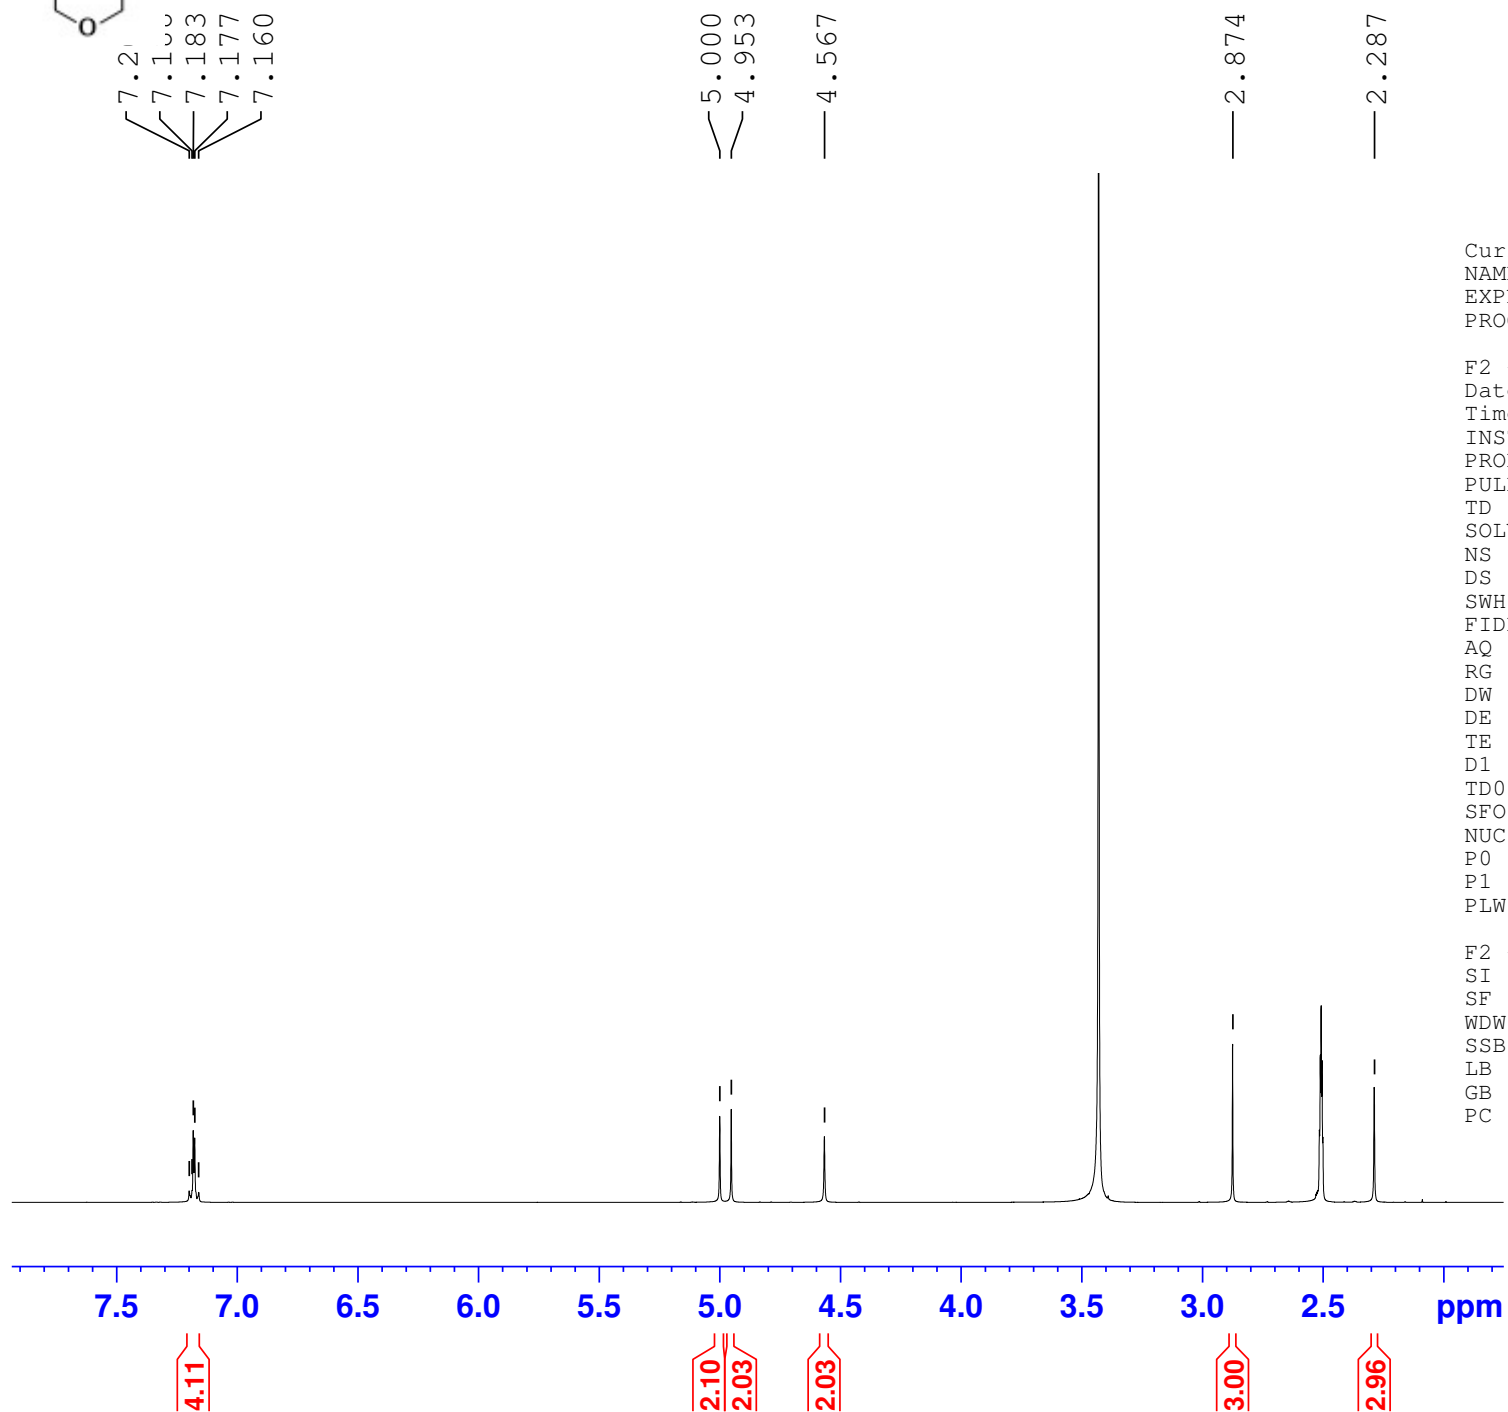

Current Data Parameters  
 NAME 43  
 EXPNO 1  
 PROCNO 1

F2 - Acquisition Parameters  
 Date\_ 20181126  
 Time 18.15 h  
 INSTRUM spect  
 PROBHD z119470\_0187 (   
 PULPROG zg30  
 TD 65536  
 SOLVENT DMSO  
 NS 16  
 DS 2  
 SWH 10000.000 Hz  
 FIDRES 0.305176 Hz  
 AQ 3.2767999 sec  
 RG 62.71  
 DW 50.000 usec  
 DE 6.50 usec  
 TE 291.0 K  
 D1 1.00000000 sec  
 TD0 1  
 SF01 500.1830886 MHz  
 NUC1 1H  
 P0 3.33 usec  
 P1 10.00 usec  
 PLW1 18.10400009 W

F2 - Processing parameters  
 SI 65536  
 SF 500.1800000 MHz  
 WDW EM  
 SSB 0  
 LB 0.30 Hz  
 GB 0  
 PC 1.00

<sup>1</sup>H NMR (500 MHz, DMSO-d<sub>6</sub>) of **43**

—156.88

—137.57

—132.92

—129.68

—128.13

—79.60

—77.42

—50.70

—33.93

—21.15

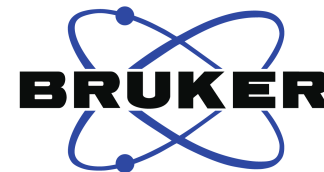

Current Data Parameters  
NAME 43  
EXPNO 2  
PROCNO 1

F2 - Acquisition Parameters  
Date\_ 20181128  
Time 9.25 h  
INSTRUM spect  
PROBHD z119470\_0187 (  
PULPROG deptq135  
TD 65536  
SOLVENT DMSO  
NS 16720  
DS 8  
SWH 29761.904 Hz  
FIDRES 0.908261 Hz  
AQ 1.1010048 sec  
RG 192.72  
DW 16.800 usec  
DE 6.50 usec  
TE 291.7 K  
CNST2 145.000000  
D1 2.00000000 sec  
D2 0.00344828 sec  
D12 0.00002000 sec  
TD0 1  
SFO1 125.7829381 MHz  
NUC1 13C  
P1 10.00 usec  
P2 20.00 usec  
PLW1 82.09700012 W  
SFO2 500.1820007 MHz  
NUC2 1H  
CPDPRG[2] waltz16  
P0 15.00 usec  
P3 10.00 usec  
P4 20.00 usec  
PCPD2 80.00 usec  
PLW2 18.10400009 W  
PLW12 0.28288001 W

F2 - Processing parameters  
SI 32768  
SF 125.7703610 MHz  
WDW EM  
SSB 0  
LB 1.00 Hz  
GB 0  
PC 1.40

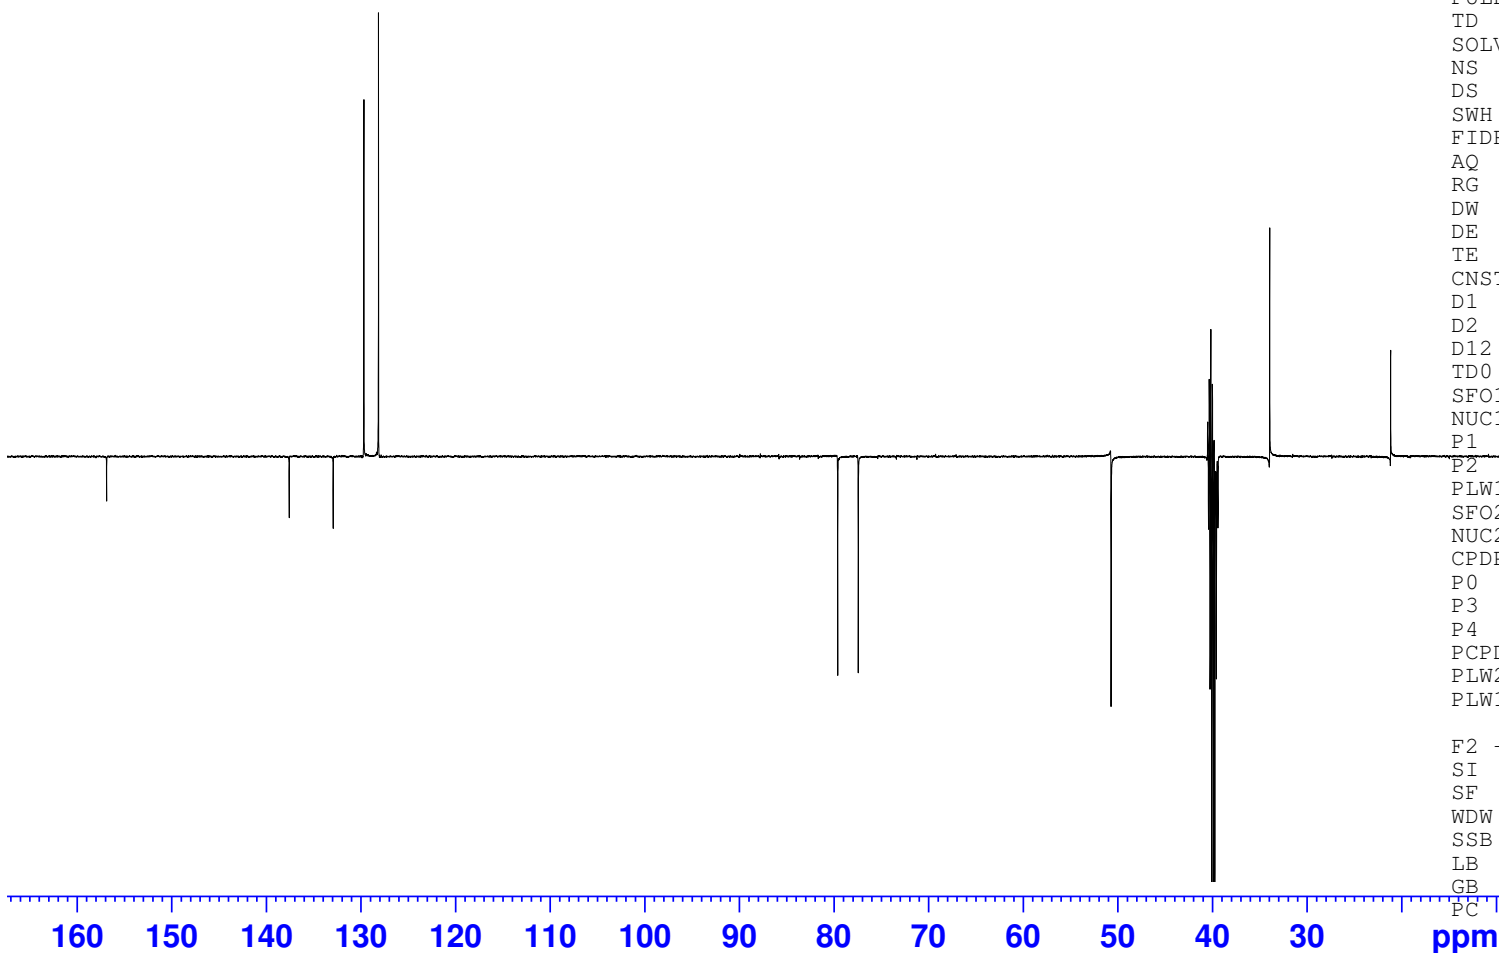

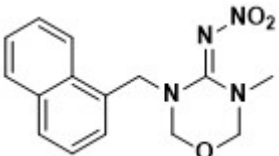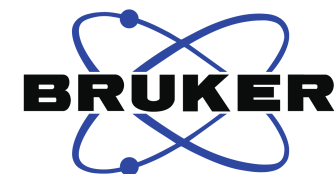

Current Data Parameters  
NAME 44  
EXPNO 1  
PROCNO 1

F2 - Acquisition Parameters  
Date\_ 20190613  
Time 18.37 h  
INSTRUM spect  
PROBHD zg30  
PULPROG zg30  
TD 65536  
SOLVENT CDCl3  
NS 5  
DS 2  
SWH 10000.000 Hz  
FIDRES 0.305176 Hz  
AQ 3.2767999 sec  
RG 139.09  
DW 50.000 usec  
DE 6.50 usec  
TE 298.0 K  
D1 1.00000000 sec  
TD0 1  
SFO1 500.1830886 MHz  
NUC1 1H  
P0 3.49 usec  
P1 10.47 usec  
PLW1 18.10400009 W

F2 - Processing parameters  
SI 65536  
SF 500.1800104 MHz  
WDW EM  
SSB 0  
LB 0.30 Hz  
GB 0  
PC 1.00

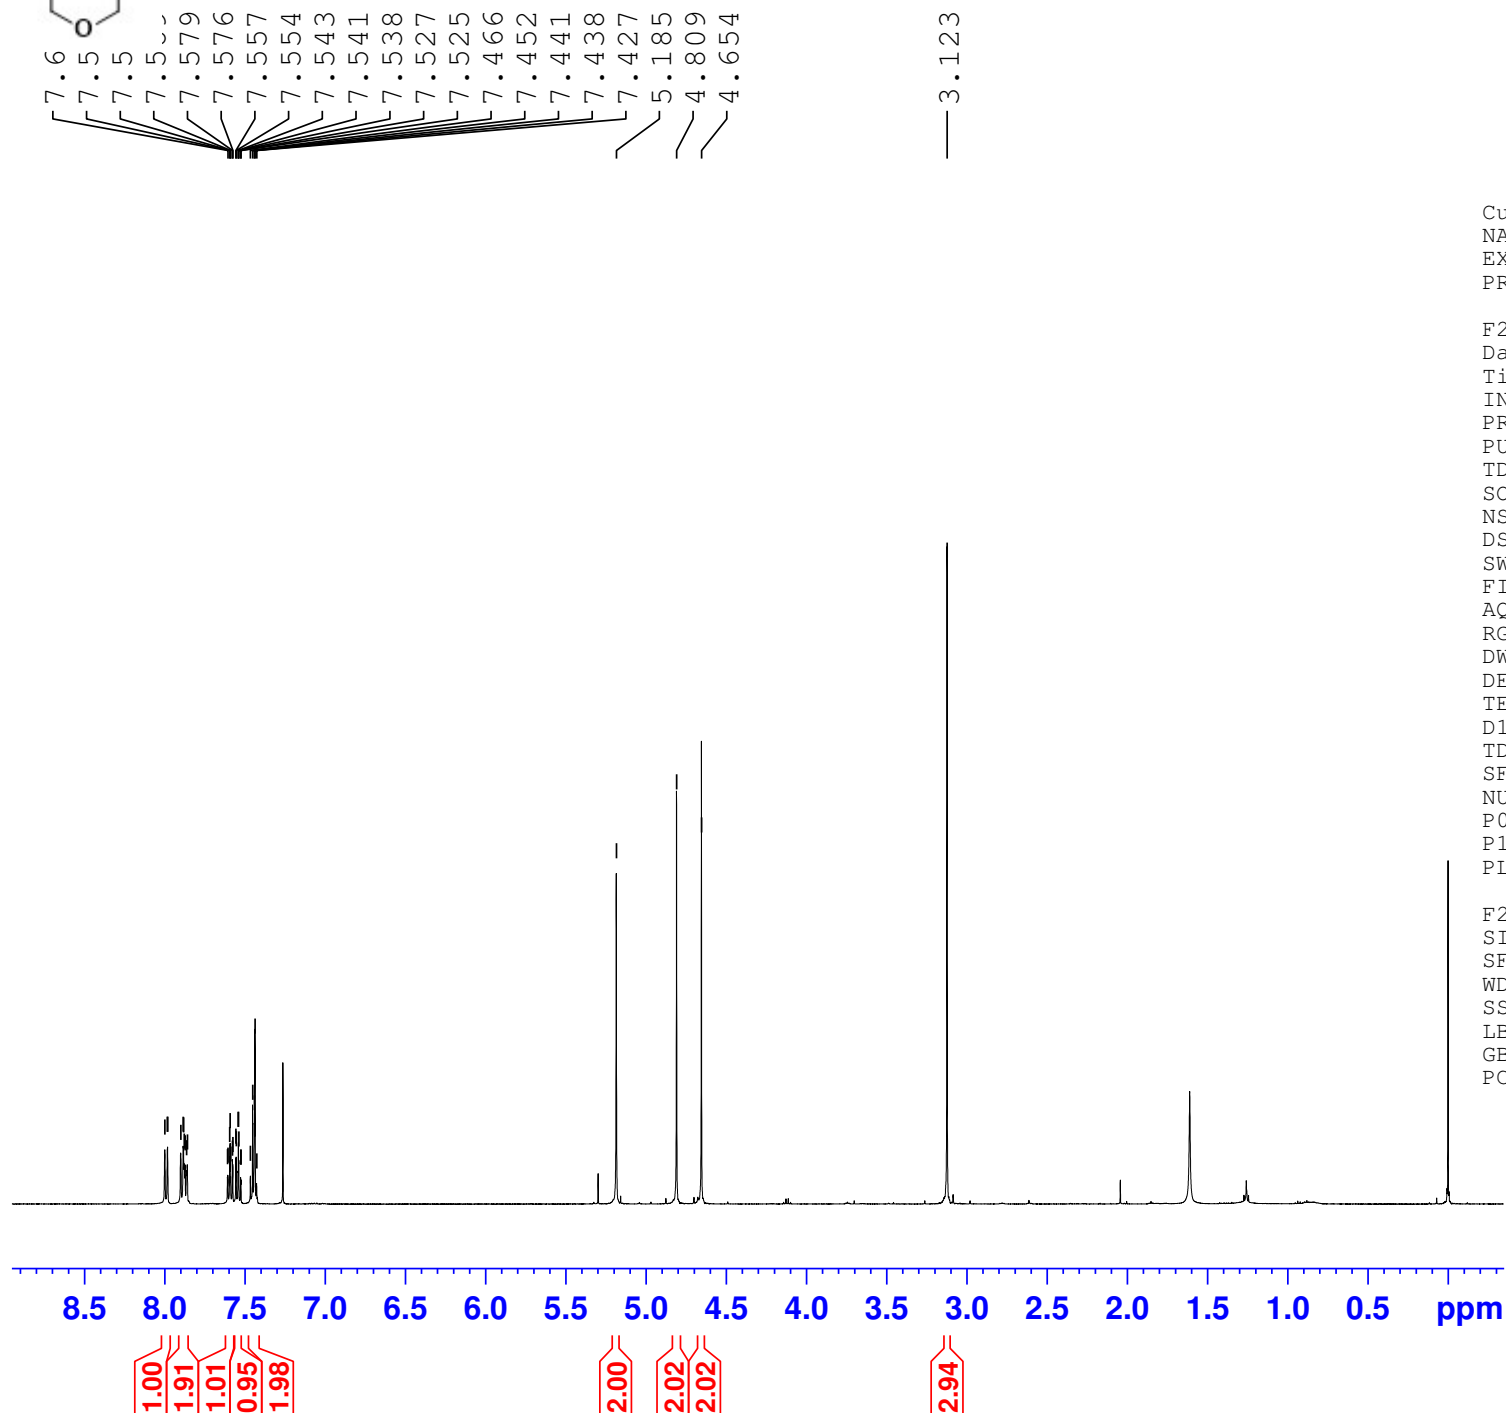

<sup>1</sup>H NMR (500 MHz, CDCl<sub>3</sub>) of **44**

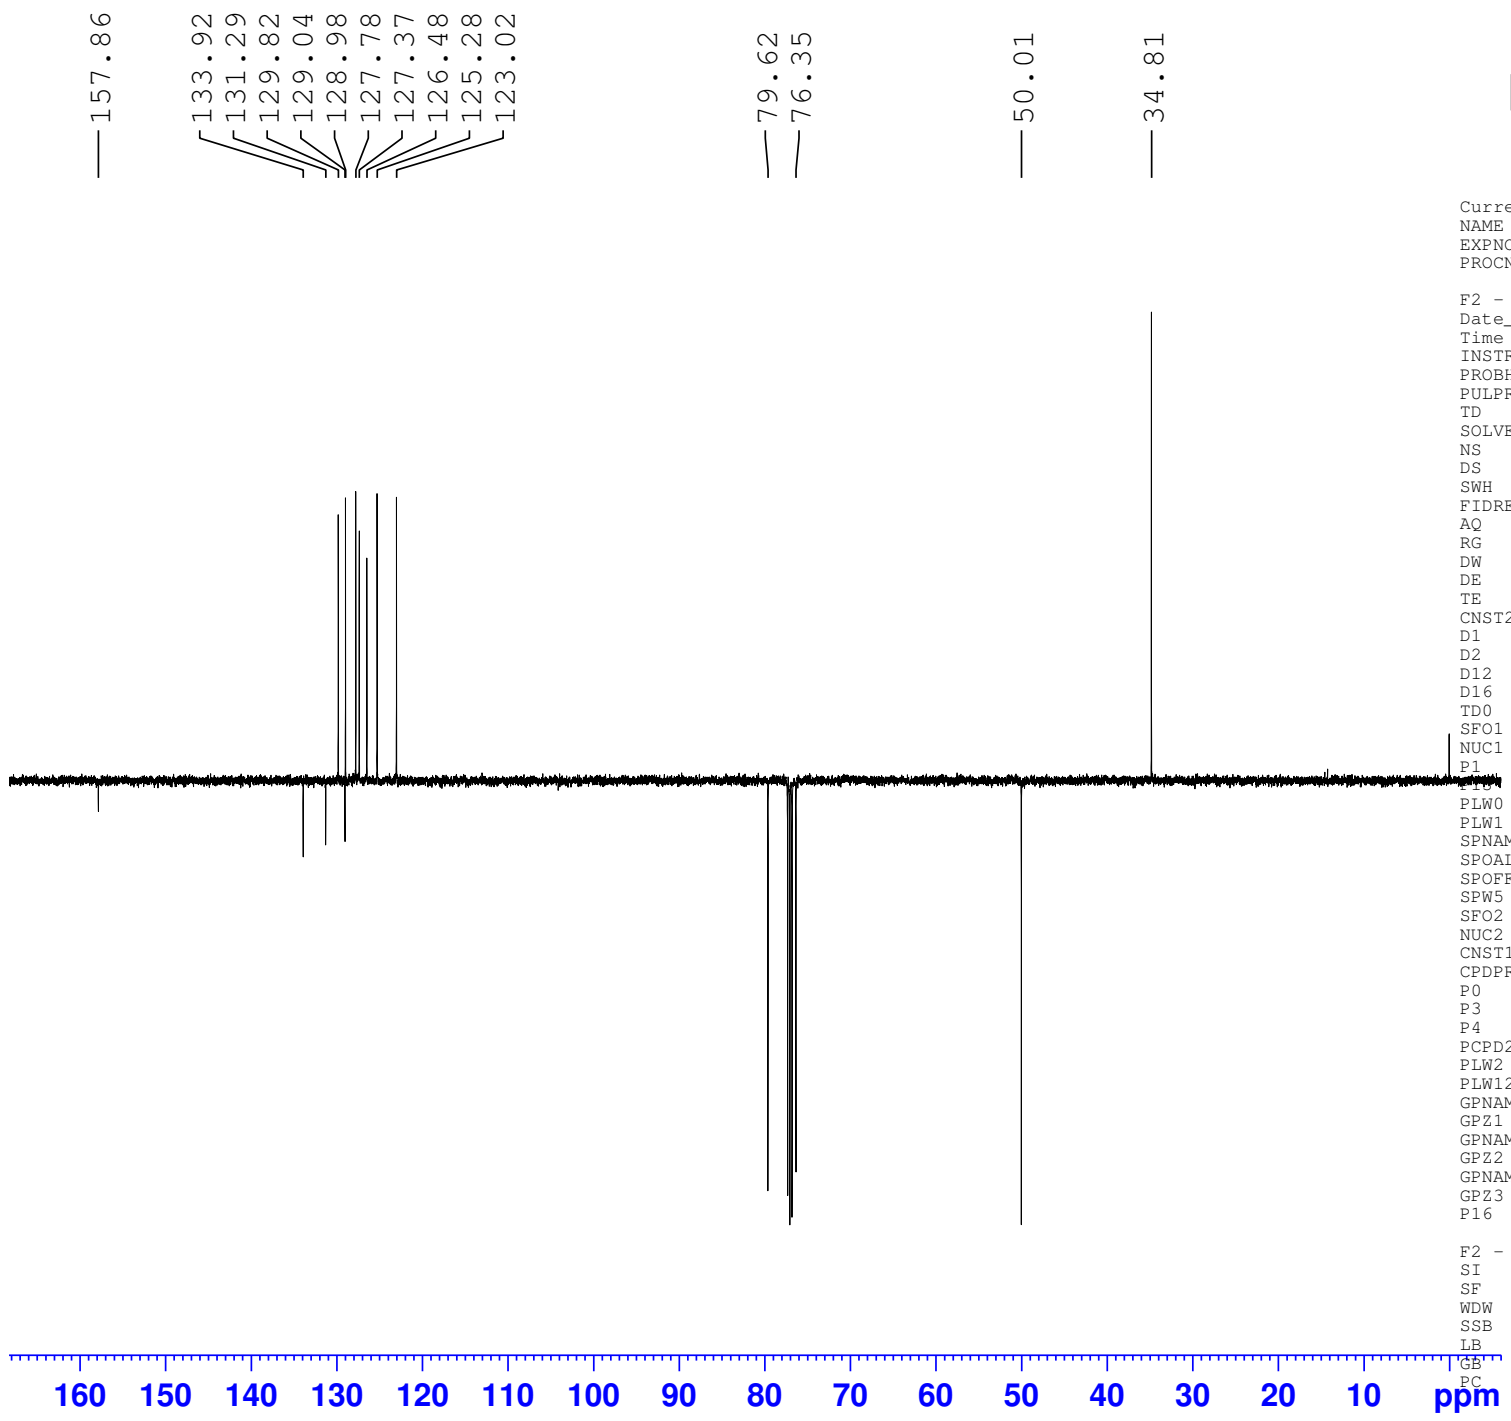

Current Data Parameters  
 NAME 44  
 EXPNO 2  
 PROCNO 1

F2 - Acquisition Parameters  
 Date\_ 20190620  
 Time 18.54 h  
 INSTRUM spect  
 PROBHD z119470\_0187 (  
 PULPROG deptqgppsp  
 TD 65536  
 SOLVENT CDCl3  
 NS 1024  
 DS 8  
 SWH 29761.904 Hz  
 FIDRES 0.908261 Hz  
 AQ 1.1010048 sec  
 RG 192.72  
 DW 16.800 usec  
 DE 6.50 usec  
 TE 291.1 K  
 CNST2 145.0000000  
 D1 2.00000000 sec  
 D2 0.00344828 sec  
 D12 0.00002000 sec  
 D16 0.00020000 sec  
 TD0 1  
 SFO1 125.7829381 MHz  
 NUC1 13C  
 P1 10.00 usec  
 P2 2000.00 usec  
 PLW0 0 W  
 PLW1 82.09700012 W  
 SPNAM[5] Crp60comp.4  
 SPOAL5 0.500  
 SPOFFS5 0 Hz  
 SPW5 12.54300022 W  
 SFO2 500.1820007 MHz  
 NUC2 1H  
 CNST12 1.5000000  
 CPDPRG[2] waltz65  
 P0 15.70 usec  
 P3 10.47 usec  
 P4 20.94 usec  
 PCPD2 80.00 usec  
 PLW2 18.10400009 W  
 PLW12 0.31009001 W  
 GPNAM[1] SMSQ10.100  
 GPZ1 31.00 %  
 GPNAM[2] SMSQ10.100  
 GPZ2 31.00 %  
 GPNAM[3] SMSQ10.100  
 GPZ3 31.00 %  
 P16 1000.00 usec

F2 - Processing parameters  
 SI 32768  
 SF 125.7703610 MHz  
 WDW EM  
 SSB 0  
 LB 1.00 Hz  
 GB 0  
 PC 1.40

<sup>13</sup>C (DEPTQ135) NMR (125 MHz, CDCl<sub>3</sub>) of 44

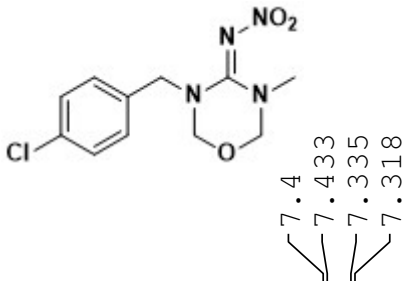

5.020  
5.000  
4.618

2.875

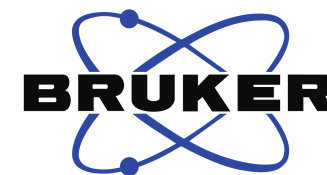

Current Data Parameters  
NAME 45  
EXPNO 1  
PROCNO 1

F2 - Acquisition Parameters  
Date\_ 20190115  
Time 10.26 h  
INSTRUM spect  
PROBHD Z119470\_0187 (  
PULPROG zg30  
TD 65536  
SOLVENT DMSO  
NS 16  
DS 2  
SWH 10000.000 Hz  
FIDRES 0.305176 Hz  
AQ 3.2767999 sec  
RG 95.16  
DW 50.000 usec  
DE 6.50 usec  
TE 291.4 K  
D1 1.00000000 sec  
TD0 1  
SFO1 500.1830886 MHz  
NUC1 1H  
P0 3.33 usec  
P1 10.00 usec  
PLW1 18.10400009 W

F2 - Processing parameters  
SI 65536  
SF 500.1800000 MHz  
WDW EM  
SSB 0  
LB 0.30 Hz  
GB 0  
PC 1.00

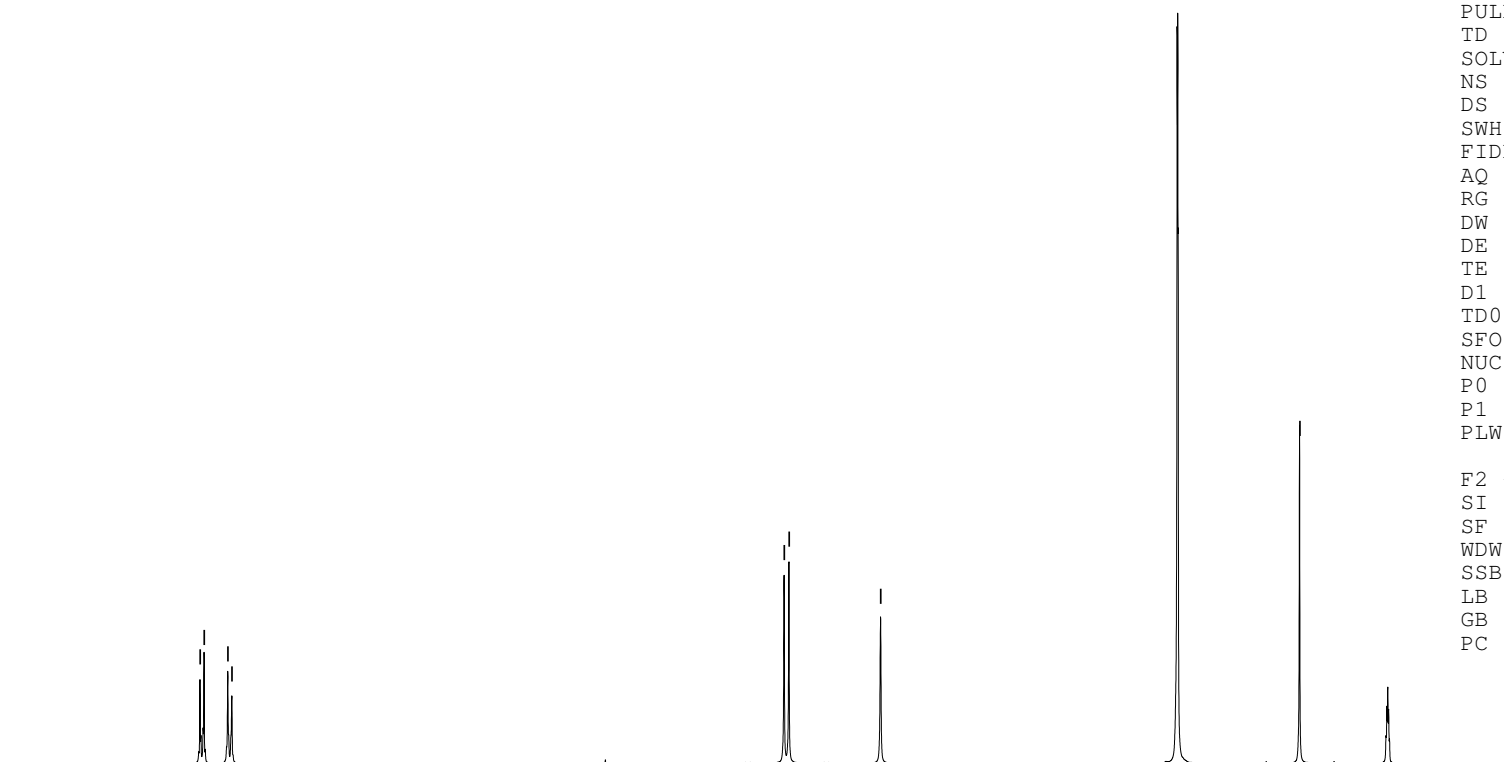

8.0 7.5 7.0 6.5 6.0 5.5 5.0 4.5 4.0 3.5 3.0 2.5 ppm

2.02  
2.06

2.08  
2.03

2.00

3.05

<sup>1</sup>H NMR (500 MHz, DMSO-d<sub>6</sub>) of 45

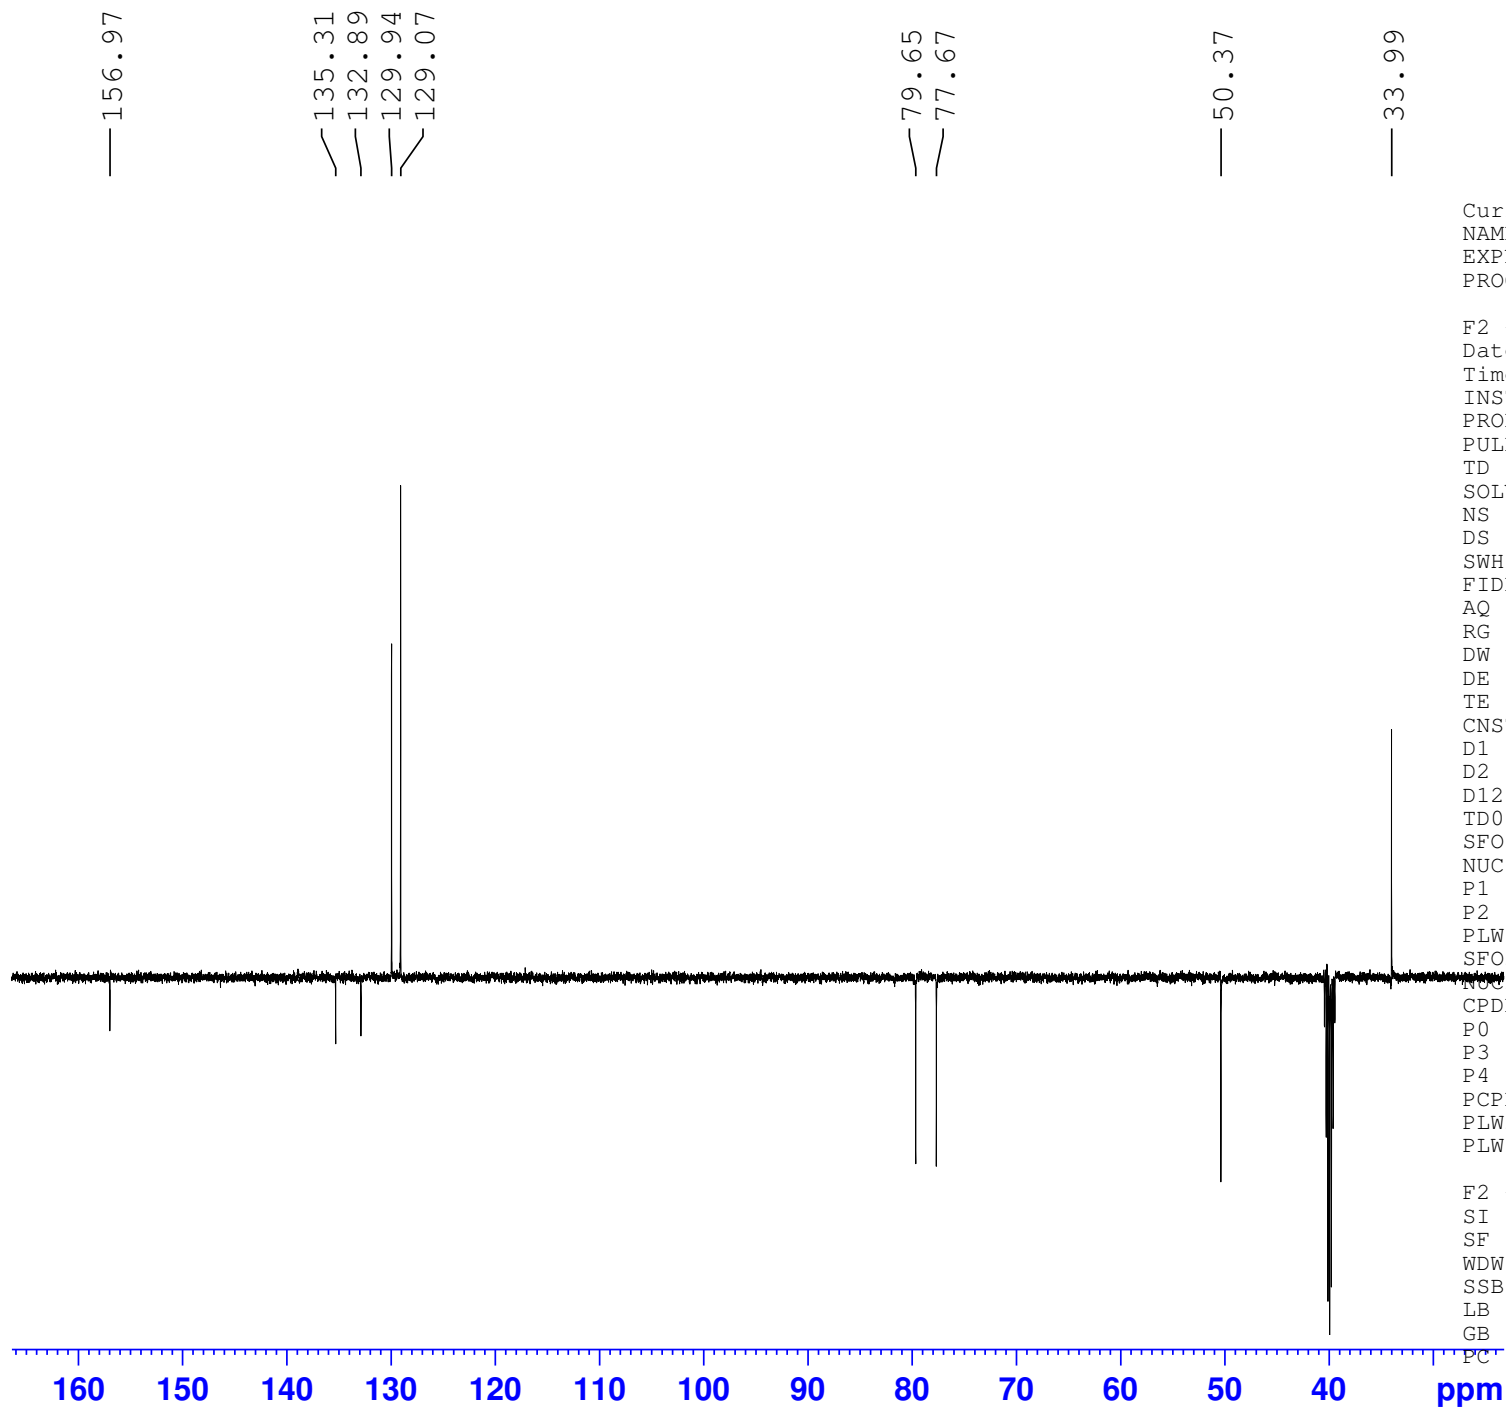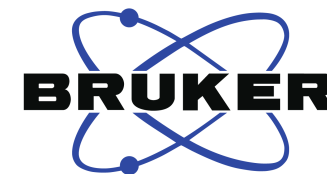

Current Data Parameters  
 NAME 45  
 EXPNO 2  
 PROCNO 1

F2 - Acquisition Parameters  
 Date\_ 20190115  
 Time 10.33 h  
 INSTRUM spect  
 PROBHD Z119470\_0187 (  
 PULPROG deptq135  
 TD 65536  
 SOLVENT DMSO  
 NS 116  
 DS 8  
 SWH 29761.904 Hz  
 FIDRES 0.908261 Hz  
 AQ 1.1010048 sec  
 RG 192.72  
 DW 16.800 usec  
 DE 6.50 usec  
 TE 291.8 K  
 CNST2 145.0000000  
 D1 2.00000000 sec  
 D2 0.00344828 sec  
 D12 0.00002000 sec  
 TD0 1  
 SFO1 125.7829381 MHz  
 NUC1 13C  
 P1 10.00 usec  
 P2 20.00 usec  
 PLW1 82.09700012 W  
 SFO2 500.1820007 MHz  
 NUC2 1H  
 CPDPRG[2] waltz16  
 P0 15.00 usec  
 P3 10.00 usec  
 P4 20.00 usec  
 PCPD2 80.00 usec  
 PLW2 18.10400009 W  
 PLW12 0.28288001 W

F2 - Processing parameters  
 SI 32768  
 SF 125.7703610 MHz  
 WDW EM  
 SSB 0  
 LB 1.00 Hz  
 GB 0  
 PC 1.40

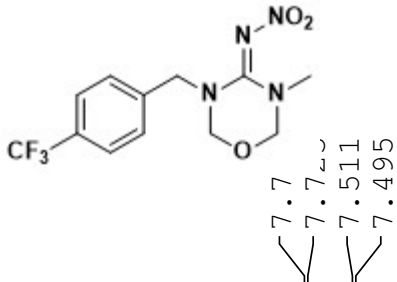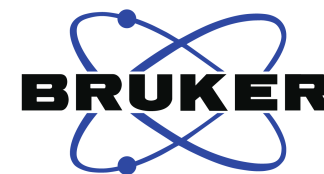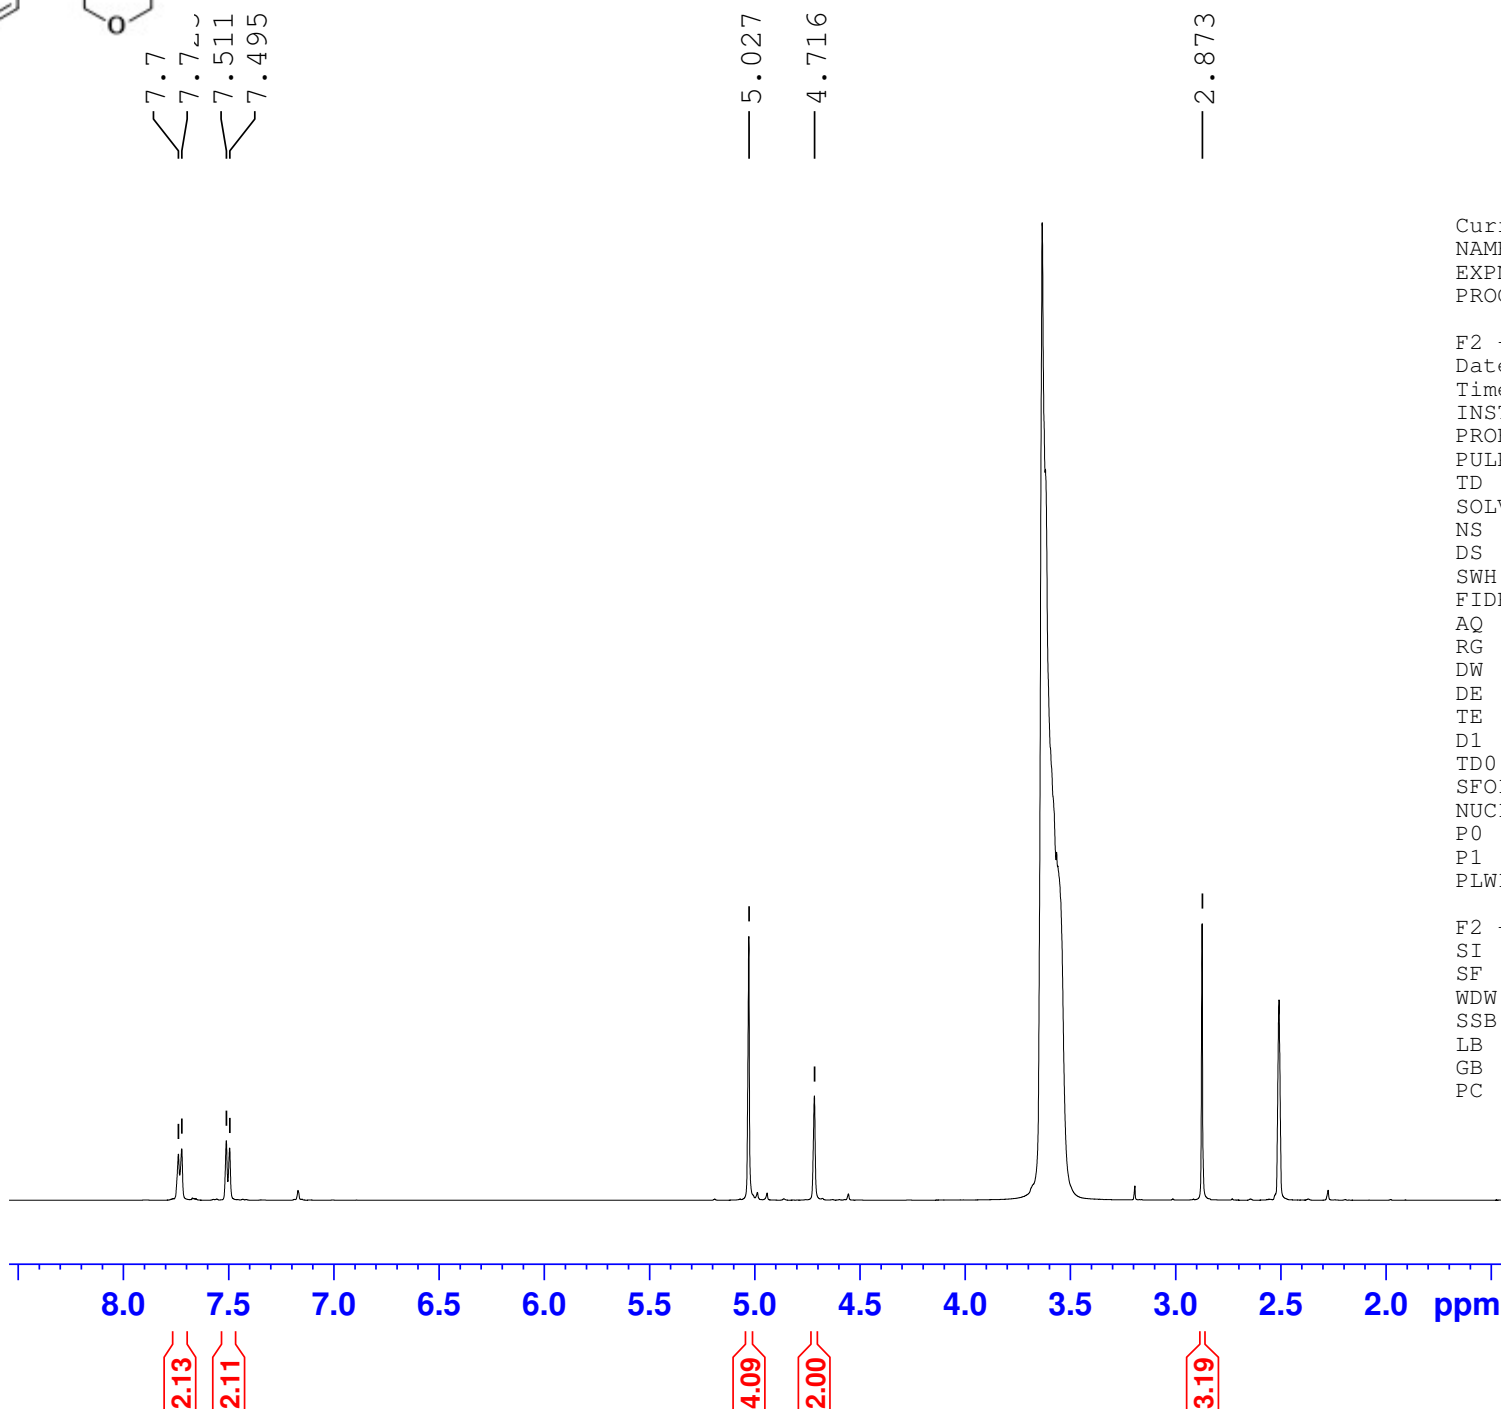

Current Data Parameters  
 NAME 46  
 EXPNO 1  
 PROCNO 1

F2 - Acquisition Parameters  
 Date\_ 20190115  
 Time 9.35 h  
 INSTRUM spect  
 PROBHD Z119470\_0187 (  
 PULPROG zg30  
 TD 65536  
 SOLVENT DMSO  
 NS 16  
 DS 2  
 SWH 10000.000 Hz  
 FIDRES 0.305176 Hz  
 AQ 3.2767999 sec  
 RG 19.48  
 DW 50.000 usec  
 DE 6.50 usec  
 TE 291.1 K  
 D1 1.00000000 sec  
 TD0 1  
 SFO1 500.1830886 MHz  
 NUC1 1H  
 P0 3.33 usec  
 P1 10.00 usec  
 PLW1 18.10400009 W

F2 - Processing parameters  
 SI 65536  
 SF 500.1800000 MHz  
 WDW EM  
 SSB 0  
 LB 0.30 Hz  
 GB 0  
 PC 1.00

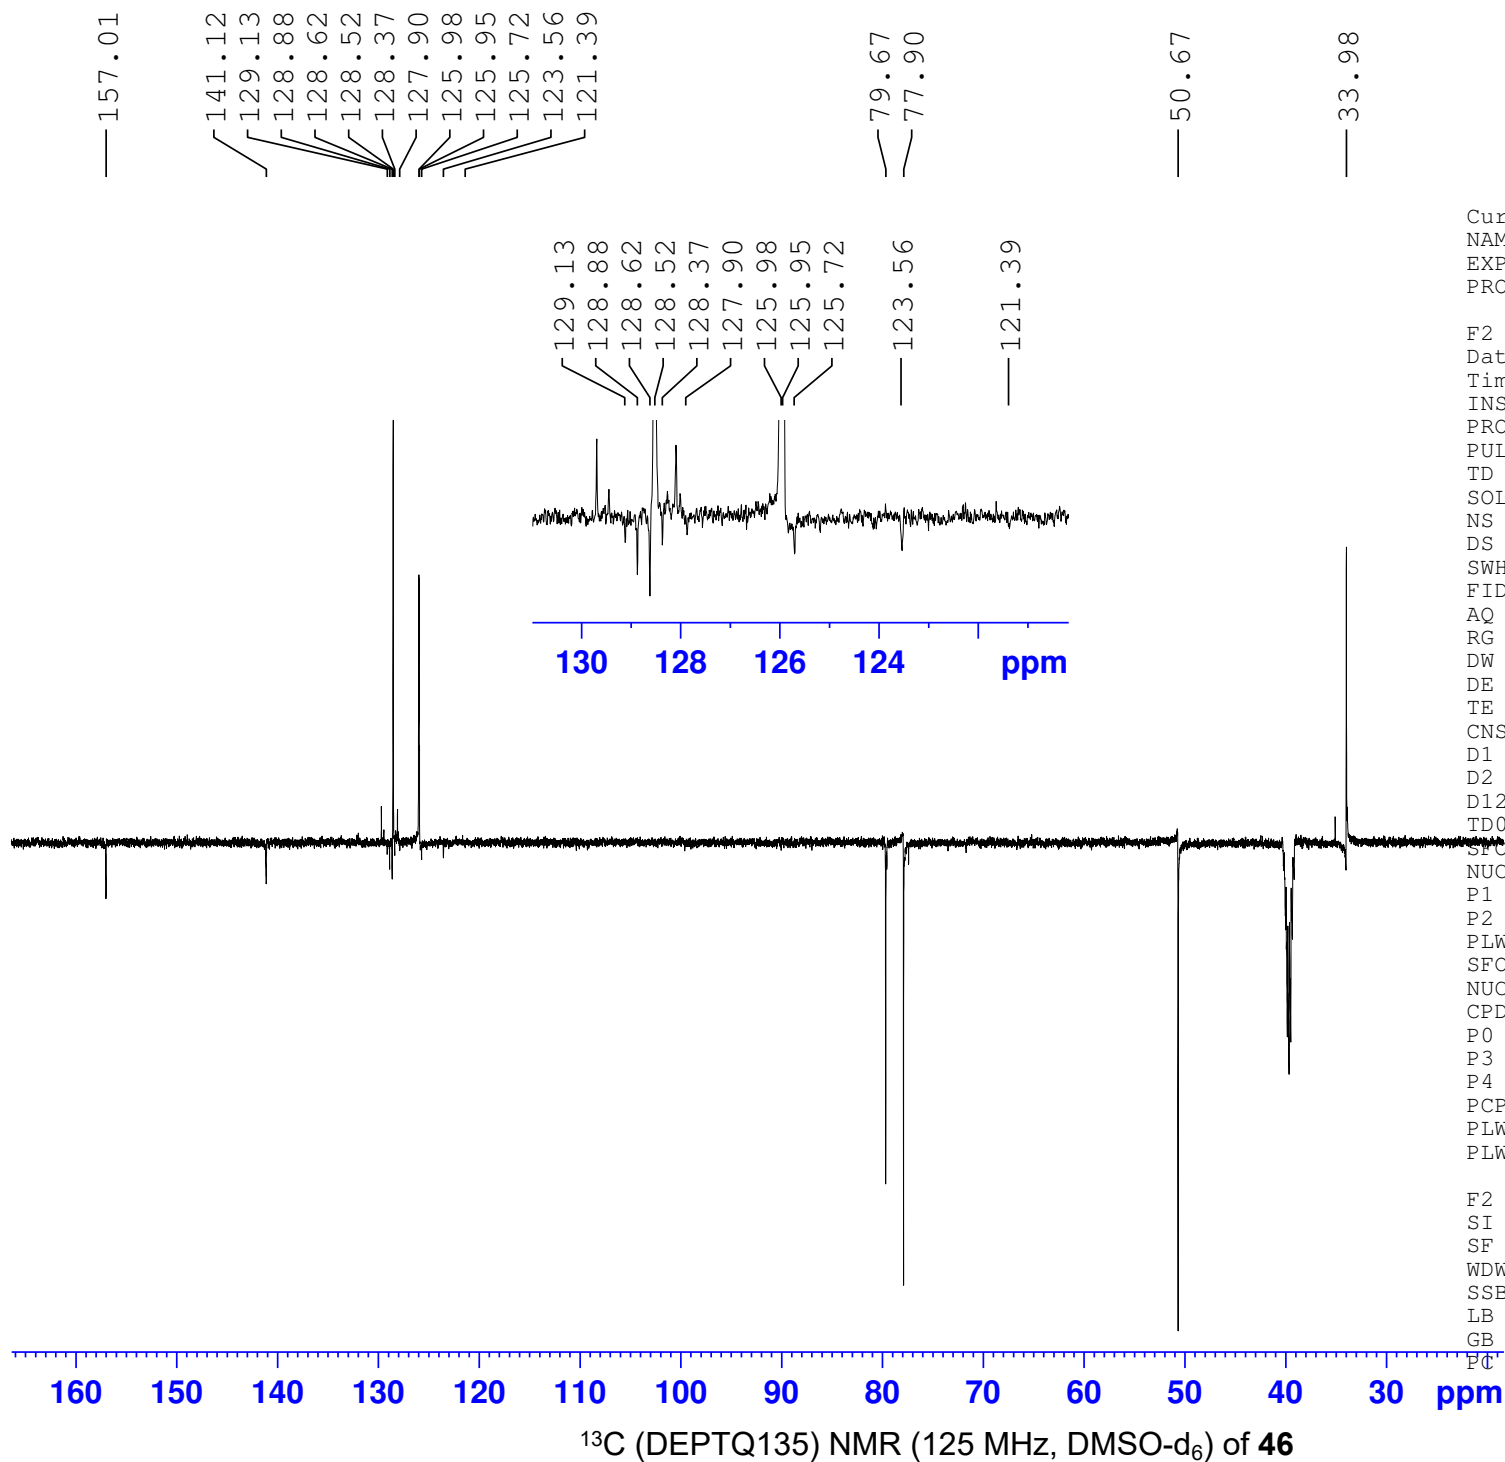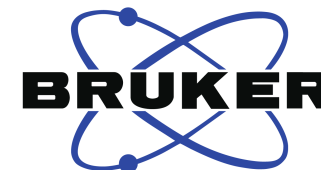

Current Data Parameters  
NAME 46  
EXPNO 2  
PROCNO 1

F2 - Acquisition Parameters  
Date\_ 20190115  
Time 10.17 h  
INSTRUM spect  
PROBHD Z119470\_0187 (  
PULPROG deptq135  
TD 65536  
SOLVENT DMSO  
NS 741  
DS 8  
SWH 29761.904 Hz  
FIDRES 0.908261 Hz  
AQ 1.1010048 sec  
RG 192.72  
DW 16.800 usec  
DE 6.50 usec  
TE 291.6 K  
CNST2 145.0000000  
D1 2.00000000 sec  
D2 0.00344828 sec  
D12 0.00002000 sec  
TD0 1  
SFO1 125.7829381 MHz  
NUC1 13C  
P1 10.00 usec  
P2 20.00 usec  
PLW1 82.09700012 W  
SFO2 500.1820007 MHz  
NUC2 1H  
CPDPRG[2] waltz16  
P0 15.00 usec  
P3 10.00 usec  
P4 20.00 usec  
PCPD2 80.00 usec  
PLW2 18.10400009 W  
PLW12 0.28288001 W

F2 - Processing parameters  
SI 32768  
SF 125.7703610 MHz  
WDW EM  
SSB 0  
LB 1.00 Hz  
GB 0  
PC 1.40



— -60.78

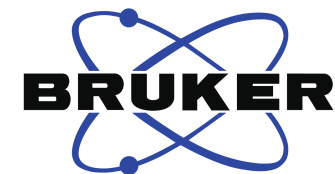

Current Data Parameters  
NAME 46  
EXPNO 3  
PROCNO 1

F2 - Acquisition Parameters  
Date\_ 20190801  
Time 14.40 h  
INSTRUM spect  
PROBHD Z119470\_0187 (  
PULPROG zgfhigqn.2  
TD 131072  
SOLVENT DMSO  
NS 16  
DS 4  
SWH 113636.367 Hz  
FIDRES 1.733953 Hz  
AQ 0.5767168 sec  
RG 11.27  
DW 4.400 usec  
DE 6.50 usec  
TE 293.4 K  
D1 1.00000000 sec  
D11 0.03000000 sec  
D12 0.00002000 sec  
TD0 1  
SFO1 470.5923603 MHz  
NUC1 19F  
P1 16.00 usec  
PLW1 36.93899918 W  
SFO2 500.1820007 MHz  
NUC2 1H  
CPDPRG[2] waltz16  
PCPD2 80.00 usec  
PLW2 18.10400009 W  
PLW12 0.31009001 W

F2 - Processing parameters  
65536  
470.6394242 MHz  
EM  
SSB 0  
LB 0.30 Hz  
GB 0  
PC 1.00

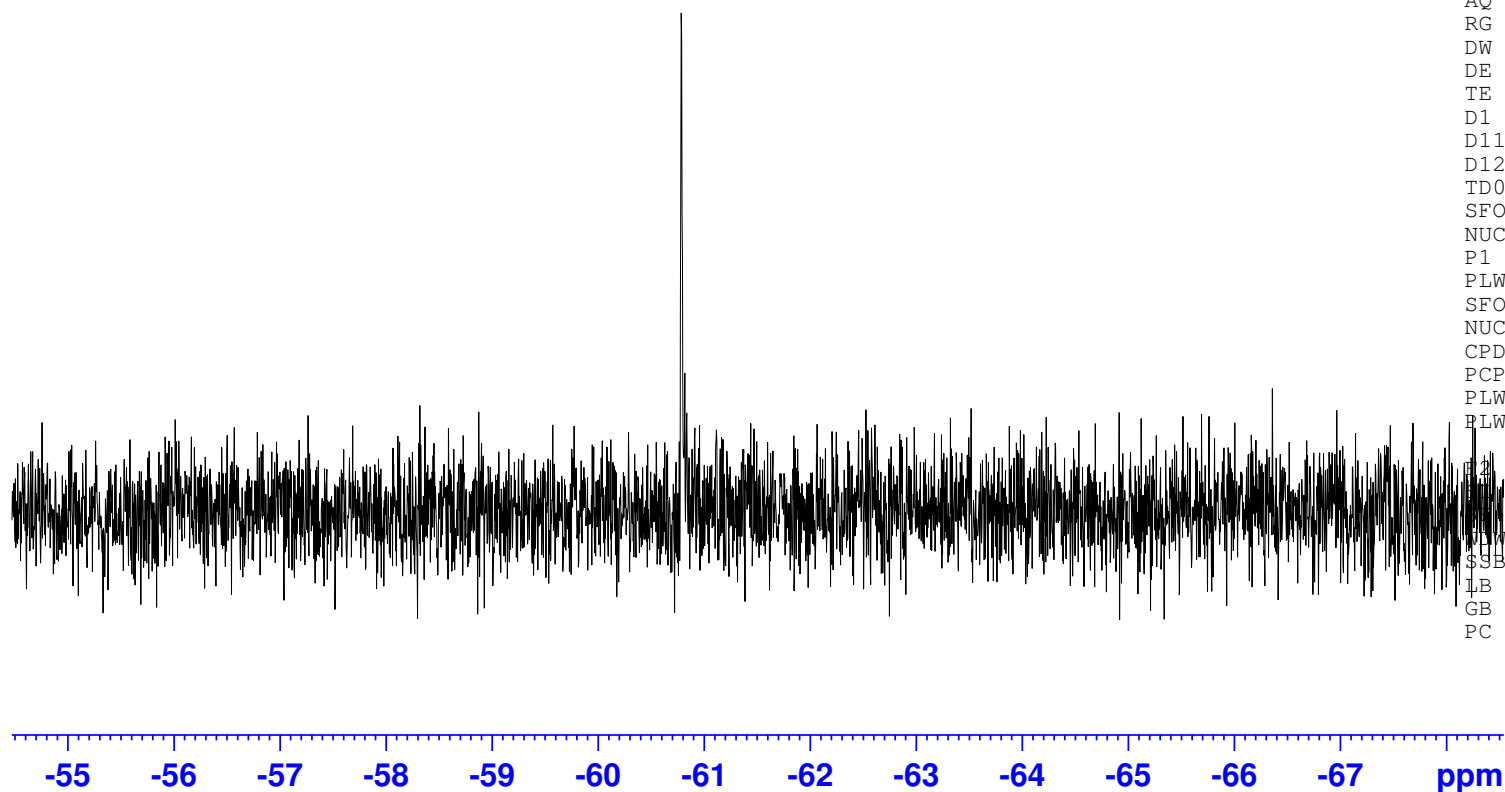

<sup>19</sup>F NMR (470 MHz, DMSO-d<sub>6</sub>) of **46**

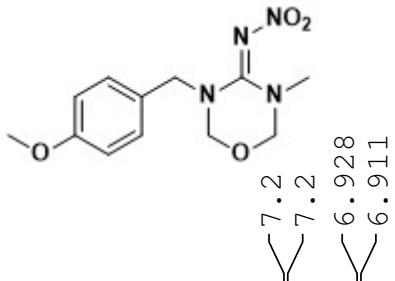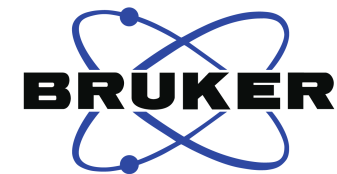

Current Data Parameters  
 NAME 47  
 EXPNO 1  
 PROCNO 1

F2 - Acquisition Parameters  
 Date\_ 20190611  
 Time 18.00 h  
 INSTRUM spect  
 PROBHD Z119470\_0187 (  
 PULPROG zg30  
 TD 65536  
 SOLVENT DMSO  
 NS 16  
 DS 2  
 SWH 10000.000 Hz  
 FIDRES 0.305176 Hz  
 AQ 3.2767999 sec  
 RG 48.27  
 DW 50.000 usec  
 DE 6.50 usec  
 TE 298.0 K  
 D1 1.00000000 sec  
 TD0 1  
 SFO1 500.1830886 MHz  
 NUC1 1H  
 P0 3.49 usec  
 P1 10.47 usec  
 PLW1 18.10400009 W

F2 - Processing parameters  
 SI 65536  
 SF 500.1800000 MHz  
 WDW EM  
 SSB 0  
 LB 0.30 Hz  
 GB 0  
 PC 1.00

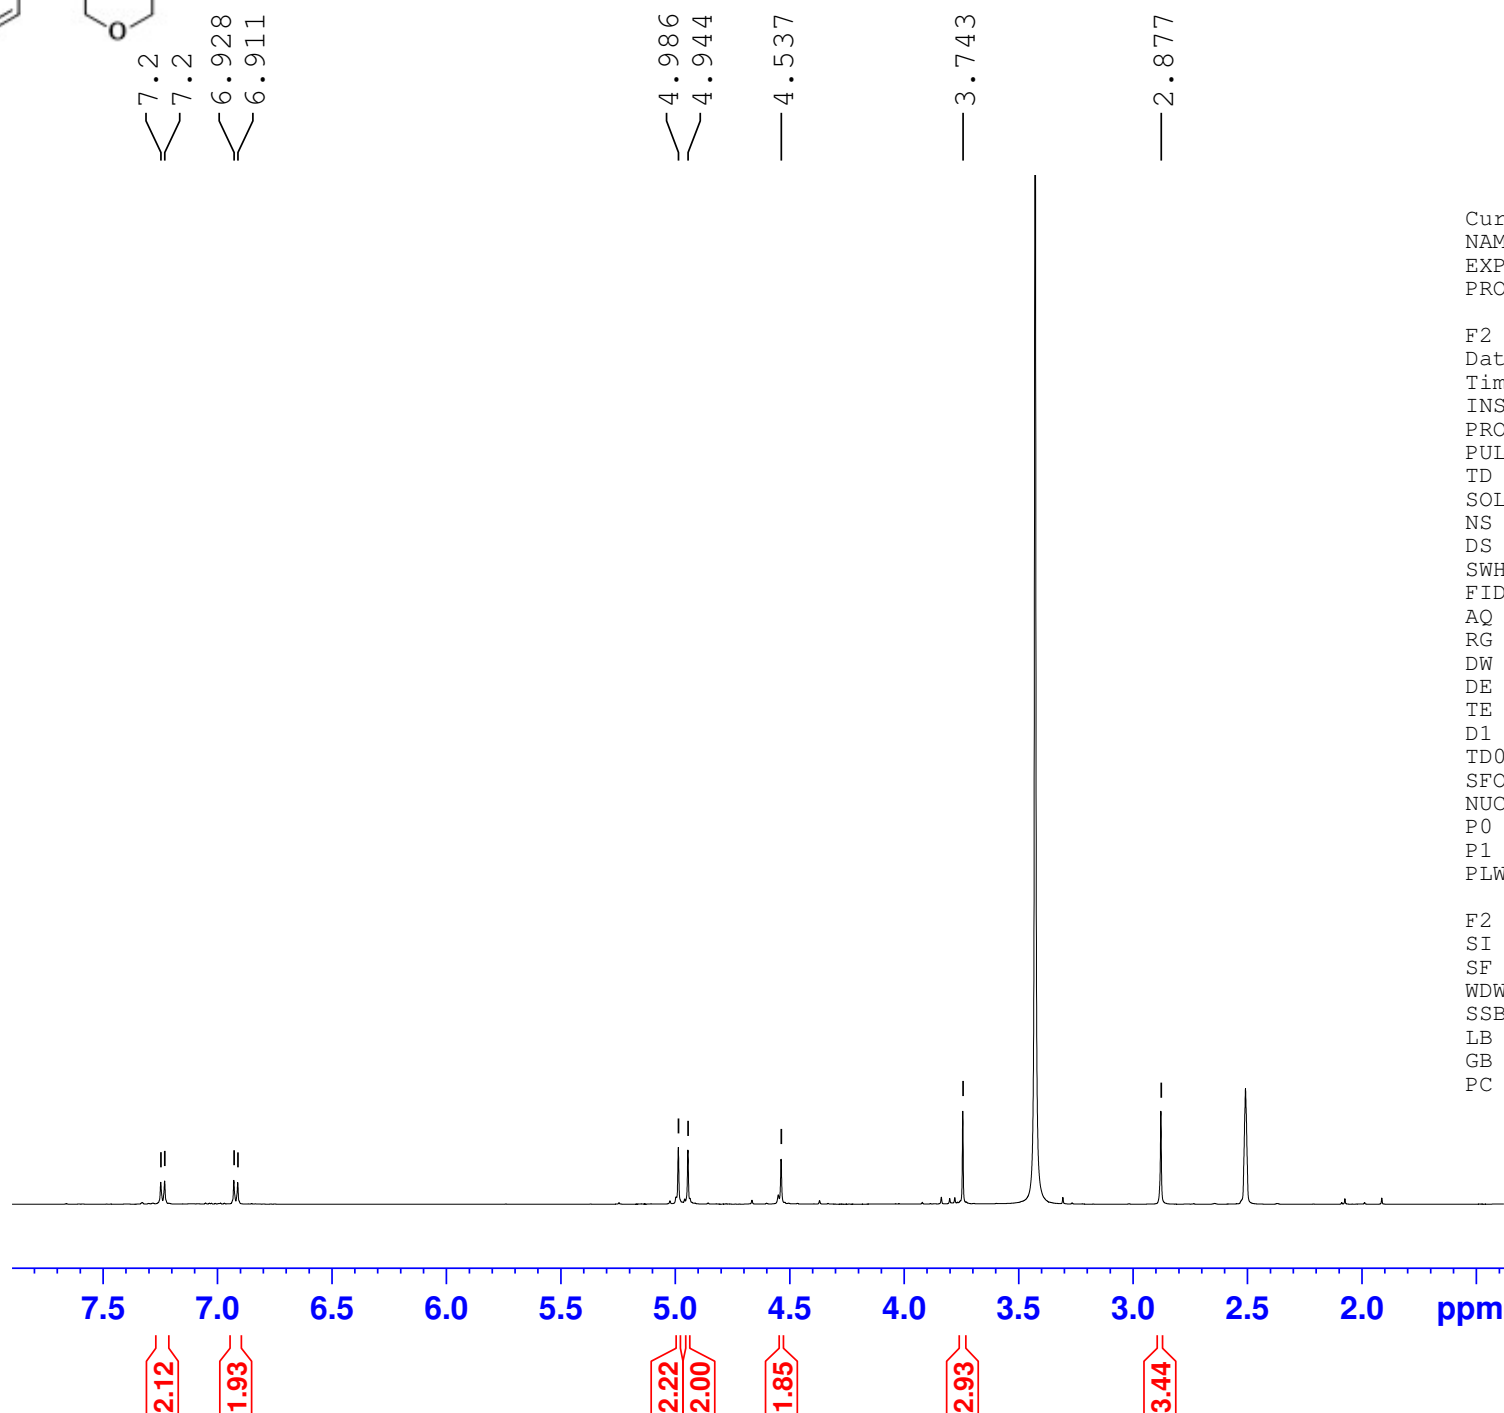

<sup>1</sup>H NMR (500 MHz, DMSO-d<sub>6</sub>) of **47**

—159.42  
—156.81

—129.71  
—127.72

—114.52

—79.58  
—77.30

—55.58  
—50.41

—33.91

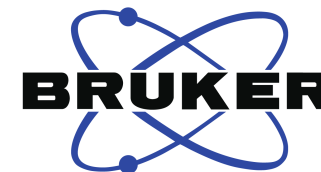

Current Data Parameters  
NAME 47  
EXPNO 3  
PROCNO 1

F2 - Acquisition Parameters  
Date\_ 20190611  
Time 18.18 h  
INSTRUM spect  
PROBHD Z119470\_0187 (  
PULPROG deptq135  
TD 65536  
SOLVENT DMSO  
NS 200  
DS 8  
SWH 29761.904 Hz  
FIDRES 0.908261 Hz  
AQ 1.1010048 sec  
RG 192.72  
DW 16.800 usec  
DE 6.50 usec  
TE 298.2 K  
CNST2 145.0000000  
D1 2.00000000 sec  
D2 0.00344828 sec  
D12 0.00002000 sec  
TD0 1  
SFO1 125.7829381 MHz  
NUC1 13C  
P1 10.00 usec  
PCPD 20.00 usec  
PLW1 82.09700012 W  
SFO2 500.1820007 MHz  
NUC2 1H  
CPDPRG[2] waltz16  
P0 15.70 usec  
P3 10.47 usec  
P4 20.94 usec  
PCPD2 80.00 usec  
PLW2 18.10400009 W  
PLW12 0.31009001 W

F2 - Processing parameters  
SI 32768  
SF 125.7703610 MHz  
WDW EM  
SSB 0  
LB 1.00 Hz  
GB 0  
PC 1.40



<sup>13</sup>C (DEPTQ135) NMR (125 MHz, DMSO-d<sub>6</sub>) of **47**
